# Supplementary material
Source: publisher figshare collection journal article supplement (https://acs.figshare.com/ndownloader/files/6864504)
Supplement: Supplementary file 1 [file 6864504]

data_global

#======================================================================

# 1. SUBMISSION DETAILS

_publ_contact_autor
;
        Hans-Joachim Drexler
        Leibniz-Institut f\"ur Katalyse e. V.
        an der Universit\"at Rostock 
        Albert-Einstein-Str. 29a
        18059 Rostock
        Germany
;
_publ_contact_author_phone        '049 381 1281 148'
_publ_contact_author_fax          '049 381 1281 51148'
_publ_contact_author_email        'hans-joachim.drexler@catalysis.de'


_publ_requested_journal           'JACS'

_publ_contact_letter
;
The actual main author is:

       'Matthias Beller'
;       Leibniz-Institut f\"ur Katalyse e. V.
        an der Universit\"at Rostock 
        Albert-Einstein-Str. 29a
        18059 Rostock
        Germany
;
  However, the x-ray investigations were performed by Dr. H.-J. Drexler.
  Please make use of his address in questions of the x-ray analysis. 

;

#======================================================================

# 2. TITLE AND AUTHOR LIST

_publ_section_title
;
Mechanism of Base-Mediated Ru(PNP)-Catalyzed Methanol Dehydrogenation
;

# The loop structure below should contain the names and addresses of 
# all authors, in the required order of publication. Repeat as 
# necessary.
loop_
 _publ_author_name
 _publ_author_address

      'Elisabetta Alberico'
;     Leibniz-Institut f\"ur Katalyse e. V. 
      an der Universit\"at Rostock 
      Albert-Einstein-Str.29a
      18059 Rostock
      Germany
;
      'Alastair J. J. Lennox'
;     Leibniz-Institut f\"ur Katalyse e. V. 
      an der Universit\"at Rostock 
      Albert-Einstein-Str.29a
      18059 Rostock
      Germany
;
      'Lydia Neumann'
;     Leibniz-Institut f\"ur Katalyse e. V. 
      an der Universit\"at Rostock 
      Albert-Einstein-Str.29a
      18059 Rostock
      Germany
;
      'Haijun Jiao'
;     Leibniz-Institut f\"ur Katalyse e. V. 
      an der Universit\"at Rostock 
      Albert-Einstein-Str.29a
      18059 Rostock
      Germany
;
      'Wolfgang Baumann'
;     Leibniz-Institut f\"ur Katalyse e. V. 
      an der Universit\"at Rostock 
      Albert-Einstein-Str.29a
      18059 Rostock
      Germany
;
      'Hans-Joachim Drexler'
;     Leibniz-Institut f\"ur Katalyse e. V. 
      an der Universit\"at Rostock 
      Albert-Einstein-Str.29a
      18059 Rostock
      Germany
;
      'Martin Nielson'
;     Centre for Catalysis and Sustainable Chemistry
      Department of Chemistry
      Technical University of Denmark
      Kemitorvet 207
      2800 Kgs. Lyngby
      Denmark
;
      'Henrik Junge'
;     Leibniz-Institut f\"ur Katalyse e. V. 
      an der Universit\"at Rostock 
      Albert-Einstein-Str.29a
      18059 Rostock
      Germany
;
      'Matthias Beller'
;     Leibniz-Institut f\"ur Katalyse e. V. 
      an der Universit\"at Rostock 
      Albert-Einstein-Str.29a
      18059 Rostock
      Germany
;

#======================================================================
 
data_ax0242abs1
 
_audit_creation_method            SHELXL-2014
_chemical_name_systematic
;
 ?
;
_chemical_name_common             ?
_chemical_melting_point           ?
_chemical_formula_moiety          ?
_chemical_formula_sum
 'C17 H38 Cl N O P2 Ru' 
_chemical_formula_weight          470.94

loop_
 _atom_type_symbol
 _atom_type_description
 _atom_type_scat_dispersion_real
 _atom_type_scat_dispersion_imag
 _atom_type_scat_source
 'C'  'C'   0.0033   0.0016
 'International Tables Vol C Tables 4.2.6.8 and 6.1.1.4'
 'H'  'H'   0.0000   0.0000
 'International Tables Vol C Tables 4.2.6.8 and 6.1.1.4'
 'N'  'N'   0.0061   0.0033
 'International Tables Vol C Tables 4.2.6.8 and 6.1.1.4'
 'O'  'O'   0.0106   0.0060
 'International Tables Vol C Tables 4.2.6.8 and 6.1.1.4'
 'P'  'P'   0.1023   0.0942
 'International Tables Vol C Tables 4.2.6.8 and 6.1.1.4'
 'Cl'  'Cl'   0.1484   0.1585
 'International Tables Vol C Tables 4.2.6.8 and 6.1.1.4'
 'Ru'  'Ru'  -1.2594   0.8363
 'International Tables Vol C Tables 4.2.6.8 and 6.1.1.4'
 
_space_group_crystal_system       orthorhombic
_space_group_IT_number            33
_space_group_name_H-M_alt         'P n a 21'
_space_group_name_Hall            'P 2c -2n'
 
_shelx_space_group_comment
;
The symmetry employed for this shelxl refinement is uniquely defined
by the following loop, which should always be used as a source of
symmetry information in preference to the above space-group names.
They are only intended as comments.
;
 
loop_
 _space_group_symop_operation_xyz
 'x, y, z'
 '-x, -y, z+1/2'
 '-x+1/2, y+1/2, z+1/2'
 'x+1/2, -y+1/2, z'
 
_cell_length_a                    16.7462(4)
_cell_length_b                    11.1318(3)
_cell_length_c                    12.3646(3)
_cell_angle_alpha                 90
_cell_angle_beta                  90
_cell_angle_gamma                 90
_cell_volume                      2304.95(10)
_cell_formula_units_Z             4
_cell_measurement_temperature     150(2)
_cell_measurement_reflns_used     9351
_cell_measurement_theta_min       2.7510
_cell_measurement_theta_max       27.5692
 
_exptl_crystal_description        prism
_exptl_crystal_colour             colourless
_exptl_crystal_size_max           0.360
_exptl_crystal_size_mid           0.350
_exptl_crystal_size_min           0.260
_exptl_crystal_density_meas       ? 
_exptl_crystal_density_method     'not measured'             
_exptl_crystal_density_diffrn     1.357          
_exptl_crystal_F_000              984
_exptl_absorpt_coefficient_mu     0.939
_exptl_absorpt_correction_type    multi-scan
_exptl_absorpt_process_details    'X-SHAPE and X-RED32 (Stoe & Cie, 2005)' 

_exptl_absorpt_correction_T_min   0.69
_exptl_absorpt_correction_T_max   0.79
 
_exptl_special_details
;
 ?
;
 
_diffrn_ambient_temperature       150(2)
_diffrn_radiation_wavelength      0.71073
_diffrn_radiation_type           'MoK\a'
_diffrn_radiation_source         'sealed tube'
_diffrn_radiation_monochromator  'graphite'
_diffrn_measurement_device_type  'Bruker APEX-II CCD'
_diffrn_measurement_method       '\f and \w scans'
_diffrn_detector_area_resol_mean  ? 
_diffrn_reflns_number             26793
_diffrn_reflns_av_unetI/netI      0.0156
_diffrn_reflns_av_R_equivalents   0.0205
_diffrn_reflns_limit_h_min        -21
_diffrn_reflns_limit_h_max        21
_diffrn_reflns_limit_k_min        -13
_diffrn_reflns_limit_k_max        14
_diffrn_reflns_limit_l_min        -15
_diffrn_reflns_limit_l_max        15
_diffrn_reflns_theta_min          2.462
_diffrn_reflns_theta_max          26.994
_diffrn_reflns_theta_full         25.242
_diffrn_measured_fraction_theta_max   0.997
_diffrn_measured_fraction_theta_full  0.996
_diffrn_reflns_Laue_measured_fraction_max    0.997
_diffrn_reflns_Laue_measured_fraction_full   0.996
_diffrn_reflns_point_group_measured_fraction_max   0.997
_diffrn_reflns_point_group_measured_fraction_full  0.996
_reflns_number_total              5014
_reflns_number_gt                 4854
_reflns_threshold_expression      'I > 2\s(I)'
_reflns_Friedel_coverage          0.910
_reflns_Friedel_fraction_max      0.997
_reflns_Friedel_fraction_full     0.997
 
_reflns_special_details
;
 Reflections were merged by SHELXL according to the crystal
 class for the calculation of statistics and refinement.
 
 _reflns_Friedel_fraction is defined as the number of unique
 Friedel pairs measured divided by the number that would be
 possible theoretically, ignoring centric projections and
 systematic absences.
;
 
_computing_data_collection        'X-AREA (Stoe & Cie, 2005)' 
_computing_cell_refinement        'X-AREA'   
_computing_data_reduction         'X-RED (Stoe & Cie, 2005)'    
_computing_structure_solution     'SHELXS-97 (Sheldrick, 2008)' 
_computing_structure_refinement   'SHELXL-97 (Sheldrick, 2008)' 
_computing_molecular_graphics     'SHELXTL (Sheldrick, 2008)'   
_computing_publication_material   'SHELXTL (Sheldrick, 2008)'  
 
_refine_special_details
;
 ?
;
_refine_ls_structure_factor_coef  Fsqd
_refine_ls_matrix_type            full
_refine_ls_weighting_scheme       calc
_refine_ls_weighting_details
'w=1/[\s^2^(Fo^2^)+(0.0313P)^2^+0.8478P] where P=(Fo^2^+2Fc^2^)/3'
_atom_sites_solution_primary      ?
_atom_sites_solution_secondary    ?
_atom_sites_solution_hydrogens    mixed
_refine_ls_hydrogen_treatment     mixed
_refine_ls_extinction_method      none
_refine_ls_extinction_coef        .
_refine_ls_abs_structure_details
;
 Flack x determined using 2267 quotients [(I+)-(I-)]/[(I+)+(I-)]
 (Parsons, Flack and Wagner, Acta Cryst. B69 (2013) 249-259).
;
_refine_ls_abs_structure_Flack    -0.006(9)
_chemical_absolute_configuration  ?
_refine_ls_number_reflns          5014
_refine_ls_number_parameters      224
_refine_ls_number_restraints      1
_refine_ls_R_factor_all           0.0199
_refine_ls_R_factor_gt            0.0187
_refine_ls_wR_factor_ref          0.0515
_refine_ls_wR_factor_gt           0.0504
_refine_ls_goodness_of_fit_ref    1.043
_refine_ls_restrained_S_all       1.043
_refine_ls_shift/su_max           0.001
_refine_ls_shift/su_mean          0.000
 
loop_
 _atom_site_label
 _atom_site_type_symbol
 _atom_site_fract_x
 _atom_site_fract_y
 _atom_site_fract_z
 _atom_site_U_iso_or_equiv
 _atom_site_adp_type
 _atom_site_occupancy
 _atom_site_site_symmetry_order  
 _atom_site_calc_flag
 _atom_site_refinement_flags_posn
 _atom_site_refinement_flags_adp
 _atom_site_refinement_flags_occupancy
 _atom_site_disorder_assembly
 _atom_site_disorder_group
Ru1 Ru 0.09117(2) 0.93196(2) 0.74258(3) 0.01852(7) Uani 1 1 d . . . . .
H1R H 0.117(3) 0.915(4) 0.862(4) 0.038(11) Uiso 1 1 d . . . . .
Cl1 Cl 0.04062(5) 0.96940(8) 0.55159(6) 0.03341(17) Uani 1 1 d . . . . .
P1 P 0.14629(4) 1.12337(6) 0.75298(8) 0.02794(16) Uani 1 1 d . . . . .
P2 P 0.00829(4) 0.76737(6) 0.76148(6) 0.02209(16) Uani 1 1 d . . . . .
O1 O 0.23920(16) 0.7918(3) 0.6948(3) 0.0497(7) Uani 1 1 d . . . . .
N1 N -0.01691(15) 1.0272(2) 0.7948(2) 0.0228(5) Uani 1 1 d . . . . .
H1 H -0.011(2) 1.026(3) 0.869(3) 0.017(8) Uiso 1 1 d . . . . .
C1 C 0.0600(2) 1.2145(3) 0.7987(3) 0.0402(8) Uani 1 1 d . . . . .
H1A H 0.0604 1.2209 0.8786 0.048 Uiso 1 1 calc R U . . .
H1B H 0.0638 1.2965 0.7682 0.048 Uiso 1 1 calc R U . . .
C2 C -0.0170(2) 1.1554(3) 0.7616(3) 0.0336(7) Uani 1 1 d . . . . .
H2A H -0.0633 1.1972 0.7943 0.040 Uiso 1 1 calc R U . . .
H2B H -0.0217 1.1613 0.6819 0.040 Uiso 1 1 calc R U . . .
C3 C -0.09100(16) 0.9643(3) 0.7650(3) 0.0284(7) Uani 1 1 d . . . . .
H3A H -0.0975 0.9646 0.6854 0.034 Uiso 1 1 calc R U . . .
H3B H -0.1375 1.0058 0.7974 0.034 Uiso 1 1 calc R U . . .
C4 C -0.08688(17) 0.8356(3) 0.8061(3) 0.0287(7) Uani 1 1 d . . . . .
H4A H -0.1324 0.7888 0.7772 0.034 Uiso 1 1 calc R U . . .
H4B H -0.0901 0.8347 0.8860 0.034 Uiso 1 1 calc R U . . .
C5 C 0.2236(3) 1.1594(4) 0.8543(4) 0.0523(11) Uani 1 1 d . . . . .
H5 H 0.2328 1.2481 0.8540 0.063 Uiso 1 1 calc R U . . .
C6 C 0.2987(3) 1.0994(7) 0.8300(5) 0.0817(18) Uani 1 1 d . . . . .
H6A H 0.3377 1.1174 0.8869 0.123 Uiso 1 1 calc R U . . .
H6B H 0.3191 1.1279 0.7603 0.123 Uiso 1 1 calc R U . . .
H6C H 0.2900 1.0124 0.8265 0.123 Uiso 1 1 calc R U . . .
C7 C 0.1956(4) 1.1206(6) 0.9705(5) 0.0809(17) Uani 1 1 d . . . . .
H7A H 0.1960 1.0328 0.9759 0.121 Uiso 1 1 calc R U . . .
H7B H 0.1414 1.1504 0.9835 0.121 Uiso 1 1 calc R U . . .
H7C H 0.2319 1.1545 1.0247 0.121 Uiso 1 1 calc R U . . .
C8 C 0.1756(2) 1.1971(3) 0.6243(3) 0.0396(8) Uani 1 1 d . . . . .
H8 H 0.1255 1.2057 0.5809 0.048 Uiso 1 1 calc R U . . .
C9 C 0.2323(2) 1.1160(4) 0.5570(3) 0.0456(9) Uani 1 1 d . . . . .
H9A H 0.2428 1.1540 0.4870 0.068 Uiso 1 1 calc R U . . .
H9B H 0.2071 1.0376 0.5455 0.068 Uiso 1 1 calc R U . . .
H9C H 0.2827 1.1053 0.5961 0.068 Uiso 1 1 calc R U . . .
C10 C 0.2108(4) 1.3224(4) 0.6339(5) 0.0712(16) Uani 1 1 d . . . . .
H10A H 0.2654 1.3169 0.6619 0.107 Uiso 1 1 calc R U . . .
H10B H 0.1781 1.3704 0.6835 0.107 Uiso 1 1 calc R U . . .
H10C H 0.2115 1.3606 0.5626 0.107 Uiso 1 1 calc R U . . .
C11 C 0.0282(2) 0.6521(3) 0.8659(3) 0.0328(7) Uani 1 1 d . . . . .
H11 H -0.0203 0.6001 0.8726 0.039 Uiso 1 1 calc R U . . .
C12 C 0.0444(3) 0.7103(3) 0.9769(3) 0.0416(9) Uani 1 1 d . . . . .
H12A H 0.0447 0.6481 1.0330 0.062 Uiso 1 1 calc R U . . .
H12B H 0.0025 0.7691 0.9929 0.062 Uiso 1 1 calc R U . . .
H12C H 0.0964 0.7508 0.9755 0.062 Uiso 1 1 calc R U . . .
C13 C 0.0989(3) 0.5724(3) 0.8354(4) 0.0445(10) Uani 1 1 d . . . . .
H13A H 0.1461 0.6226 0.8227 0.067 Uiso 1 1 calc R U . . .
H13B H 0.0862 0.5274 0.7695 0.067 Uiso 1 1 calc R U . . .
H13C H 0.1099 0.5160 0.8945 0.067 Uiso 1 1 calc R U . . .
C14 C -0.0217(2) 0.6853(3) 0.6381(3) 0.0346(7) Uani 1 1 d . . . . .
H14 H -0.0541 0.7436 0.5950 0.042 Uiso 1 1 calc R U . . .
C15 C 0.0482(2) 0.6503(3) 0.5651(3) 0.0375(8) Uani 1 1 d . . . . .
H15A H 0.0809 0.5896 0.6015 0.056 Uiso 1 1 calc R U . . .
H15B H 0.0808 0.7215 0.5500 0.056 Uiso 1 1 calc R U . . .
H15C H 0.0276 0.6174 0.4971 0.056 Uiso 1 1 calc R U . . .
C16 C -0.0769(3) 0.5786(4) 0.6587(4) 0.0527(12) Uani 1 1 d . . . . .
H16A H -0.1004 0.5521 0.5901 0.079 Uiso 1 1 calc R U . . .
H16B H -0.1196 0.6026 0.7085 0.079 Uiso 1 1 calc R U . . .
H16C H -0.0462 0.5125 0.6906 0.079 Uiso 1 1 calc R U . . .
C17 C 0.18222(19) 0.8474(3) 0.7113(3) 0.0301(7) Uani 1 1 d . . . . .
 
loop_
 _atom_site_aniso_label
 _atom_site_aniso_U_11
 _atom_site_aniso_U_22
 _atom_site_aniso_U_33
 _atom_site_aniso_U_23
 _atom_site_aniso_U_13
 _atom_site_aniso_U_12
Ru1 0.02090(10) 0.01917(10) 0.01548(10) -0.00152(10) -0.00122(11) 0.00303(7)
Cl1 0.0441(4) 0.0404(4) 0.0157(3) 0.0024(3) -0.0027(3) 0.0045(4)
P1 0.0332(3) 0.0216(3) 0.0290(4) -0.0022(4) 0.0026(4) -0.0006(3)
P2 0.0228(3) 0.0215(3) 0.0219(4) -0.0055(3) -0.0003(3) 0.0009(2)
O1 0.0294(13) 0.0449(15) 0.0749(19) -0.0089(14) 0.0025(12) 0.0102(11)
N1 0.0271(12) 0.0237(12) 0.0178(12) 0.0000(9) 0.0012(9) 0.0064(10)
C1 0.052(2) 0.0219(15) 0.047(2) -0.0026(14) 0.0181(17) 0.0027(15)
C2 0.0410(16) 0.0263(13) 0.0335(19) 0.0034(13) 0.0098(15) 0.0133(12)
C3 0.0241(13) 0.0352(15) 0.026(2) -0.0046(12) -0.0016(12) 0.0104(11)
C4 0.0211(15) 0.0317(16) 0.0333(18) -0.0091(13) 0.0028(11) 0.0003(12)
C5 0.060(3) 0.039(2) 0.058(3) -0.0138(19) -0.017(2) -0.012(2)
C6 0.058(3) 0.122(5) 0.065(3) -0.029(4) -0.006(3) -0.017(3)
C7 0.084(4) 0.105(5) 0.054(3) -0.019(3) -0.010(3) -0.009(4)
C8 0.041(2) 0.0332(18) 0.044(2) 0.0103(15) 0.0125(17) 0.0014(15)
C9 0.042(2) 0.059(2) 0.036(2) 0.0056(19) 0.0152(17) -0.0050(19)
C10 0.089(4) 0.036(2) 0.089(4) 0.016(2) 0.032(3) -0.015(2)
C11 0.044(2) 0.0227(15) 0.0313(17) 0.0032(13) 0.0062(15) -0.0009(14)
C12 0.064(3) 0.0351(18) 0.0254(16) 0.0039(14) 0.0011(16) 0.0172(18)
C13 0.064(3) 0.0292(19) 0.040(2) 0.0011(15) 0.0009(19) 0.0187(16)
C14 0.0327(17) 0.0379(18) 0.0333(17) -0.0180(14) -0.0058(14) 0.0027(14)
C15 0.042(2) 0.0402(19) 0.0304(18) -0.0149(16) -0.0014(15) 0.0044(15)
C16 0.036(2) 0.053(3) 0.070(3) -0.038(2) 0.004(2) -0.0083(17)
C17 0.0304(15) 0.0269(14) 0.0330(17) -0.0030(12) -0.0028(12) 0.0007(13)
 
_geom_special_details
;
 All esds (except the esd in the dihedral angle between two l.s. planes)
 are estimated using the full covariance matrix.  The cell esds are taken
 into account individually in the estimation of esds in distances, angles
 and torsion angles; correlations between esds in cell parameters are only
 used when they are defined by crystal symmetry.  An approximate (isotropic)
 treatment of cell esds is used for estimating esds involving l.s. planes.
;
 
loop_
 _geom_bond_atom_site_label_1
 _geom_bond_atom_site_label_2
 _geom_bond_distance
 _geom_bond_site_symmetry_2
 _geom_bond_publ_flag
Ru1 C17 1.833(3) . ?
Ru1 N1 2.195(2) . ?
Ru1 P2 2.3103(7) . ?
Ru1 P1 2.3257(7) . ?
Ru1 Cl1 2.5429(8) . ?
Ru1 H1R 1.55(4) . ?
P1 C5 1.846(4) . ?
P1 C1 1.853(4) . ?
P1 C8 1.857(4) . ?
P2 C14 1.848(3) . ?
P2 C4 1.850(3) . ?
P2 C11 1.851(4) . ?
O1 C17 1.156(4) . ?
N1 C3 1.472(4) . ?
N1 C2 1.485(4) . ?
N1 H1 0.93(4) . ?
C1 C2 1.519(5) . ?
C1 H1A 0.9900 . ?
C1 H1B 0.9900 . ?
C2 H2A 0.9900 . ?
C2 H2B 0.9900 . ?
C3 C4 1.522(5) . ?
C3 H3A 0.9900 . ?
C3 H3B 0.9900 . ?
C4 H4A 0.9900 . ?
C4 H4B 0.9900 . ?
C5 C6 1.455(8) . ?
C5 C7 1.572(8) . ?
C5 H5 1.0000 . ?
C6 H6A 0.9800 . ?
C6 H6B 0.9800 . ?
C6 H6C 0.9800 . ?
C7 H7A 0.9800 . ?
C7 H7B 0.9800 . ?
C7 H7C 0.9800 . ?
C8 C10 1.518(6) . ?
C8 C9 1.552(5) . ?
C8 H8 1.0000 . ?
C9 H9A 0.9800 . ?
C9 H9B 0.9800 . ?
C9 H9C 0.9800 . ?
C10 H10A 0.9800 . ?
C10 H10B 0.9800 . ?
C10 H10C 0.9800 . ?
C11 C13 1.528(5) . ?
C11 C12 1.542(5) . ?
C11 H11 1.0000 . ?
C12 H12A 0.9800 . ?
C12 H12B 0.9800 . ?
C12 H12C 0.9800 . ?
C13 H13A 0.9800 . ?
C13 H13B 0.9800 . ?
C13 H13C 0.9800 . ?
C14 C16 1.527(6) . ?
C14 C15 1.528(5) . ?
C14 H14 1.0000 . ?
C15 H15A 0.9800 . ?
C15 H15B 0.9800 . ?
C15 H15C 0.9800 . ?
C16 H16A 0.9800 . ?
C16 H16B 0.9800 . ?
C16 H16C 0.9800 . ?
 
loop_
 _geom_angle_atom_site_label_1
 _geom_angle_atom_site_label_2
 _geom_angle_atom_site_label_3
 _geom_angle
 _geom_angle_site_symmetry_1
 _geom_angle_site_symmetry_3
 _geom_angle_publ_flag
C17 Ru1 N1 174.90(12) . . ?
C17 Ru1 P2 96.53(10) . . ?
N1 Ru1 P2 81.84(7) . . ?
C17 Ru1 P1 98.74(10) . . ?
N1 Ru1 P1 82.44(7) . . ?
P2 Ru1 P1 163.62(3) . . ?
C17 Ru1 Cl1 99.51(10) . . ?
N1 Ru1 Cl1 85.39(7) . . ?
P2 Ru1 Cl1 91.38(3) . . ?
P1 Ru1 Cl1 91.91(3) . . ?
C17 Ru1 H1R 84.7(16) . . ?
N1 Ru1 H1R 90.4(16) . . ?
P2 Ru1 H1R 88.3(16) . . ?
P1 Ru1 H1R 87.3(15) . . ?
Cl1 Ru1 H1R 175.8(16) . . ?
C5 P1 C1 102.8(2) . . ?
C5 P1 C8 107.5(2) . . ?
C1 P1 C8 103.03(17) . . ?
C5 P1 Ru1 120.99(15) . . ?
C1 P1 Ru1 102.05(12) . . ?
C8 P1 Ru1 117.56(14) . . ?
C14 P2 C4 102.41(16) . . ?
C14 P2 C11 106.38(17) . . ?
C4 P2 C11 103.38(16) . . ?
C14 P2 Ru1 118.17(13) . . ?
C4 P2 Ru1 102.84(11) . . ?
C11 P2 Ru1 120.83(12) . . ?
C3 N1 C2 112.8(2) . . ?
C3 N1 Ru1 113.05(18) . . ?
C2 N1 Ru1 112.57(19) . . ?
C3 N1 H1 109(2) . . ?
C2 N1 H1 107(2) . . ?
Ru1 N1 H1 102(2) . . ?
C2 C1 P1 109.5(2) . . ?
C2 C1 H1A 109.8 . . ?
P1 C1 H1A 109.8 . . ?
C2 C1 H1B 109.8 . . ?
P1 C1 H1B 109.8 . . ?
H1A C1 H1B 108.2 . . ?
N1 C2 C1 109.3(3) . . ?
N1 C2 H2A 109.8 . . ?
C1 C2 H2A 109.8 . . ?
N1 C2 H2B 109.8 . . ?
C1 C2 H2B 109.8 . . ?
H2A C2 H2B 108.3 . . ?
N1 C3 C4 109.0(2) . . ?
N1 C3 H3A 109.9 . . ?
C4 C3 H3A 109.9 . . ?
N1 C3 H3B 109.9 . . ?
C4 C3 H3B 109.9 . . ?
H3A C3 H3B 108.3 . . ?
C3 C4 P2 109.0(2) . . ?
C3 C4 H4A 109.9 . . ?
P2 C4 H4A 109.9 . . ?
C3 C4 H4B 109.9 . . ?
P2 C4 H4B 109.9 . . ?
H4A C4 H4B 108.3 . . ?
C6 C5 C7 108.7(5) . . ?
C6 C5 P1 111.5(3) . . ?
C7 C5 P1 110.5(3) . . ?
C6 C5 H5 108.7 . . ?
C7 C5 H5 108.7 . . ?
P1 C5 H5 108.7 . . ?
C5 C6 H6A 109.5 . . ?
C5 C6 H6B 109.5 . . ?
H6A C6 H6B 109.5 . . ?
C5 C6 H6C 109.5 . . ?
H6A C6 H6C 109.5 . . ?
H6B C6 H6C 109.5 . . ?
C5 C7 H7A 109.5 . . ?
C5 C7 H7B 109.5 . . ?
H7A C7 H7B 109.5 . . ?
C5 C7 H7C 109.5 . . ?
H7A C7 H7C 109.5 . . ?
H7B C7 H7C 109.5 . . ?
C10 C8 C9 109.8(4) . . ?
C10 C8 P1 116.2(3) . . ?
C9 C8 P1 111.3(3) . . ?
C10 C8 H8 106.3 . . ?
C9 C8 H8 106.3 . . ?
P1 C8 H8 106.3 . . ?
C8 C9 H9A 109.5 . . ?
C8 C9 H9B 109.5 . . ?
H9A C9 H9B 109.5 . . ?
C8 C9 H9C 109.5 . . ?
H9A C9 H9C 109.5 . . ?
H9B C9 H9C 109.5 . . ?
C8 C10 H10A 109.5 . . ?
C8 C10 H10B 109.5 . . ?
H10A C10 H10B 109.5 . . ?
C8 C10 H10C 109.5 . . ?
H10A C10 H10C 109.5 . . ?
H10B C10 H10C 109.5 . . ?
C13 C11 C12 109.1(3) . . ?
C13 C11 P2 111.7(3) . . ?
C12 C11 P2 111.2(2) . . ?
C13 C11 H11 108.3 . . ?
C12 C11 H11 108.3 . . ?
P2 C11 H11 108.3 . . ?
C11 C12 H12A 109.5 . . ?
C11 C12 H12B 109.5 . . ?
H12A C12 H12B 109.5 . . ?
C11 C12 H12C 109.5 . . ?
H12A C12 H12C 109.5 . . ?
H12B C12 H12C 109.5 . . ?
C11 C13 H13A 109.5 . . ?
C11 C13 H13B 109.5 . . ?
H13A C13 H13B 109.5 . . ?
C11 C13 H13C 109.5 . . ?
H13A C13 H13C 109.5 . . ?
H13B C13 H13C 109.5 . . ?
C16 C14 C15 111.3(3) . . ?
C16 C14 P2 114.4(3) . . ?
C15 C14 P2 113.9(2) . . ?
C16 C14 H14 105.4 . . ?
C15 C14 H14 105.4 . . ?
P2 C14 H14 105.4 . . ?
C14 C15 H15A 109.5 . . ?
C14 C15 H15B 109.5 . . ?
H15A C15 H15B 109.5 . . ?
C14 C15 H15C 109.5 . . ?
H15A C15 H15C 109.5 . . ?
H15B C15 H15C 109.5 . . ?
C14 C16 H16A 109.5 . . ?
C14 C16 H16B 109.5 . . ?
H16A C16 H16B 109.5 . . ?
C14 C16 H16C 109.5 . . ?
H16A C16 H16C 109.5 . . ?
H16B C16 H16C 109.5 . . ?
O1 C17 Ru1 177.7(3) . . ?
 
loop_
 _geom_torsion_atom_site_label_1
 _geom_torsion_atom_site_label_2
 _geom_torsion_atom_site_label_3
 _geom_torsion_atom_site_label_4
 _geom_torsion
 _geom_torsion_site_symmetry_1
 _geom_torsion_site_symmetry_2
 _geom_torsion_site_symmetry_3
 _geom_torsion_site_symmetry_4
 _geom_torsion_publ_flag
C5 P1 C1 C2 -153.3(3) . . . . ?
C8 P1 C1 C2 95.1(3) . . . . ?
Ru1 P1 C1 C2 -27.3(3) . . . . ?
C3 N1 C2 C1 178.1(2) . . . . ?
Ru1 N1 C2 C1 -52.6(3) . . . . ?
P1 C1 C2 N1 51.6(3) . . . . ?
C2 N1 C3 C4 -177.7(2) . . . . ?
Ru1 N1 C3 C4 53.1(3) . . . . ?
N1 C3 C4 P2 -51.0(3) . . . . ?
C14 P2 C4 C3 -96.7(2) . . . . ?
C11 P2 C4 C3 152.9(2) . . . . ?
Ru1 P2 C4 C3 26.4(2) . . . . ?
C1 P1 C5 C6 -177.7(4) . . . . ?
C8 P1 C5 C6 -69.4(4) . . . . ?
Ru1 P1 C5 C6 69.6(5) . . . . ?
C1 P1 C5 C7 61.3(4) . . . . ?
C8 P1 C5 C7 169.5(4) . . . . ?
Ru1 P1 C5 C7 -51.5(4) . . . . ?
C5 P1 C8 C10 -39.8(4) . . . . ?
C1 P1 C8 C10 68.3(4) . . . . ?
Ru1 P1 C8 C10 179.5(3) . . . . ?
C5 P1 C8 C9 86.9(3) . . . . ?
C1 P1 C8 C9 -165.0(3) . . . . ?
Ru1 P1 C8 C9 -53.8(3) . . . . ?
C14 P2 C11 C13 64.5(3) . . . . ?
C4 P2 C11 C13 171.9(3) . . . . ?
Ru1 P2 C11 C13 -74.0(3) . . . . ?
C14 P2 C11 C12 -173.4(3) . . . . ?
C4 P2 C11 C12 -66.0(3) . . . . ?
Ru1 P2 C11 C12 48.1(3) . . . . ?
C4 P2 C14 C16 -67.5(3) . . . . ?
C11 P2 C14 C16 40.7(3) . . . . ?
Ru1 P2 C14 C16 -179.6(2) . . . . ?
C4 P2 C14 C15 162.9(3) . . . . ?
C11 P2 C14 C15 -88.9(3) . . . . ?
Ru1 P2 C14 C15 50.8(3) . . . . ?
 
_refine_diff_density_max    0.825
_refine_diff_density_min   -0.244
_refine_diff_density_rms    0.053

_shelxl_version_number 2014-3

_shelx_res_file
;
TITL test in Pna2(1)
CELL 0.71073 16.7462 11.1318 12.3646 90.000 90.000 90.000
ZERR 4.00 0.0004 0.0003 0.0003 0.000 0.000 0.000
LATT -1
SYMM -x, -y, z+1/2
SYMM -x+1/2, y+1/2, z+1/2
SYMM x+1/2, -y+1/2, z
SFAC C  H  N  O  P  Cl Ru
UNIT 68  152  4  4  8  4  4
OMIT -4 54
L.S. 7
ACTA
BOND $H
FMAP 2
PLAN 5
CONF
OMIT     1   2   0
OMIT     3   2  -3
OMIT     1   3  -3
OMIT     4   0   0
OMIT     3   2   3
OMIT     2   1   3
OMIT     1   3   3
OMIT     2   1  -3
OMIT     3   1   2

TEMP -123.150
WGHT    0.031300    0.847800
FVAR       0.12975
RU1   7    0.091167    0.931960    0.742576    11.00000    0.02090    0.01917 =
         0.01548   -0.00152   -0.00122    0.00303
H1R   2    0.116604    0.914620    0.861809    11.00000    0.03761
CL1   6    0.040623    0.969405    0.551593    11.00000    0.04414    0.04040 =
         0.01568    0.00237   -0.00275    0.00450
P1    5    0.146292    1.123375    0.752984    11.00000    0.03325    0.02161 =
         0.02897   -0.00217    0.00258   -0.00064
P2    5    0.008294    0.767370    0.761481    11.00000    0.02278    0.02154 =
         0.02195   -0.00553   -0.00035    0.00093
O1    4    0.239201    0.791811    0.694773    11.00000    0.02938    0.04492 =
         0.07495   -0.00893    0.00251    0.01022
N1    3   -0.016914    1.027230    0.794810    11.00000    0.02707    0.02368 =
         0.01778    0.00005    0.00124    0.00639
H1    2   -0.011406    1.025571    0.869308    11.00000    0.01726
C1    1    0.060038    1.214457    0.798705    11.00000    0.05209    0.02186 =
         0.04657   -0.00262    0.01814    0.00268
AFIX  23
H1A   2    0.060440    1.220866    0.878562    11.00000   -1.20000
H1B   2    0.063839    1.296491    0.768213    11.00000   -1.20000
AFIX   0
C2    1   -0.017019    1.155449    0.761574    11.00000    0.04099    0.02631 =
         0.03345    0.00344    0.00985    0.01331
AFIX  23
H2A   2   -0.063312    1.197182    0.794255    11.00000   -1.20000
H2B   2   -0.021677    1.161337    0.681932    11.00000   -1.20000
AFIX   0
C3    1   -0.091001    0.964301    0.764995    11.00000    0.02410    0.03523 =
         0.02591   -0.00457   -0.00164    0.01042
AFIX  23
H3A   2   -0.097492    0.964599    0.685412    11.00000   -1.20000
H3B   2   -0.137512    1.005787    0.797362    11.00000   -1.20000
AFIX   0
C4    1   -0.086880    0.835576    0.806084    11.00000    0.02115    0.03166 =
         0.03328   -0.00913    0.00280    0.00025
AFIX  23
H4A   2   -0.132404    0.788784    0.777194    11.00000   -1.20000
H4B   2   -0.090052    0.834716    0.886033    11.00000   -1.20000
AFIX   0
C5    1    0.223643    1.159373    0.854307    11.00000    0.06041    0.03886 =
         0.05763   -0.01375   -0.01674   -0.01238
AFIX  13
H5    2    0.232816    1.248139    0.854044    11.00000   -1.20000
AFIX   0
C6    1    0.298722    1.099391    0.830005    11.00000    0.05778    0.12220 =
         0.06513   -0.02935   -0.00644   -0.01685
AFIX 137
H6A   2    0.337691    1.117410    0.886866    11.00000   -1.50000
H6B   2    0.319066    1.127931    0.760273    11.00000   -1.50000
H6C   2    0.289979    1.012429    0.826507    11.00000   -1.50000
AFIX   0
C7    1    0.195586    1.120610    0.970530    11.00000    0.08365    0.10538 =
         0.05371   -0.01850   -0.00956   -0.00904
AFIX 137
H7A   2    0.195994    1.032776    0.975872    11.00000   -1.50000
H7B   2    0.141361    1.150425    0.983484    11.00000   -1.50000
H7C   2    0.231916    1.154468    1.024675    11.00000   -1.50000
AFIX   0
C8    1    0.175585    1.197137    0.624291    11.00000    0.04146    0.03316 =
         0.04418    0.01027    0.01251    0.00139
AFIX  13
H8    2    0.125518    1.205656    0.580885    11.00000   -1.20000
AFIX   0
C9    1    0.232272    1.116014    0.557022    11.00000    0.04204    0.05907 =
         0.03577    0.00558    0.01521   -0.00502
AFIX 137
H9A   2    0.242835    1.153972    0.486955    11.00000   -1.50000
H9B   2    0.207106    1.037570    0.545504    11.00000   -1.50000
H9C   2    0.282670    1.105274    0.596129    11.00000   -1.50000
AFIX   0
C10   1    0.210759    1.322355    0.633929    11.00000    0.08897    0.03580 =
         0.08893    0.01575    0.03193   -0.01451
AFIX 137
H10A  2    0.265384    1.316926    0.661941    11.00000   -1.50000
H10B  2    0.178108    1.370360    0.683512    11.00000   -1.50000
H10C  2    0.211495    1.360622    0.562557    11.00000   -1.50000
AFIX   0
C11   1    0.028152    0.652117    0.865933    11.00000    0.04435    0.02272 =
         0.03125    0.00319    0.00617   -0.00088
AFIX  13
H11   2   -0.020283    0.600098    0.872593    11.00000   -1.20000
AFIX   0
C12   1    0.044394    0.710345    0.976938    11.00000    0.06425    0.03514 =
         0.02544    0.00391    0.00114    0.01719
AFIX 137
H12A  2    0.044685    0.648116    1.033000    11.00000   -1.50000
H12B  2    0.002455    0.769136    0.992880    11.00000   -1.50000
H12C  2    0.096363    0.750788    0.975478    11.00000   -1.50000
AFIX   0
C13   1    0.098935    0.572385    0.835433    11.00000    0.06447    0.02924 =
         0.03973    0.00113    0.00085    0.01867
AFIX 137
H13A  2    0.146088    0.622584    0.822746    11.00000   -1.50000
H13B  2    0.086212    0.527412    0.769511    11.00000   -1.50000
H13C  2    0.109900    0.516024    0.894481    11.00000   -1.50000
AFIX   0
C14   1   -0.021713    0.685277    0.638128    11.00000    0.03268    0.03793 =
         0.03330   -0.01795   -0.00584    0.00265
AFIX  13
H14   2   -0.054087    0.743648    0.595038    11.00000   -1.20000
AFIX   0
C15   1    0.048166    0.650305    0.565112    11.00000    0.04179    0.04021 =
         0.03038   -0.01485   -0.00139    0.00442
AFIX 137
H15A  2    0.080939    0.589584    0.601490    11.00000   -1.50000
H15B  2    0.080756    0.721466    0.549971    11.00000   -1.50000
H15C  2    0.027610    0.617441    0.497057    11.00000   -1.50000
AFIX   0
C16   1   -0.076922    0.578562    0.658654    11.00000    0.03567    0.05291 =
         0.06965   -0.03751    0.00410   -0.00832
AFIX 137
H16A  2   -0.100410    0.552080    0.590087    11.00000   -1.50000
H16B  2   -0.119552    0.602583    0.708460    11.00000   -1.50000
H16C  2   -0.046245    0.512515    0.690593    11.00000   -1.50000
AFIX   0
C17   1    0.182216    0.847393    0.711310    11.00000    0.03037    0.02695 =
         0.03297   -0.00297   -0.00276    0.00073
HKLF 4 1 1 0 0 0 1 0 0 0 1

REM  test in Pna2(1)
REM R1 =  0.0187 for    4854 Fo > 4sig(Fo)  and  0.0199 for all    5014 data
REM    224 parameters refined using      1 restraints

END

WGHT      0.0285      0.9043

REM Highest difference peak  0.825,  deepest hole -0.244,  1-sigma level  0.053
Q1    1   0.2389  1.2831  0.8952  11.00000  0.05    0.83
Q2    1   0.2597  1.0555  0.9148  11.00000  0.05    0.77
Q3    1   0.2625  1.0554  0.5765  11.00000  0.05    0.50
Q4    1   0.2456  1.2813  0.5986  11.00000  0.05    0.48
Q5    1   0.0523  0.9026  0.7451  11.00000  0.05    0.28
;
_shelx_res_checksum   34759

_shelx_hkl_file
;
   0   1   0    0.03    0.03
   0   1   0    0.01    0.03
   0  -2   0   13.48    0.38
   0   2   0   12.77    0.38
   0   3   0   -0.09    0.12
   0  -3   0    0.03    0.11
   0   3   0    0.03    0.11
   0   4   0   25.20    0.73
   0  -4   0   26.01    0.73
   0   4   0   24.79    0.72
   0   5   0    0.09    0.16
   0   5   0    0.02    0.13
   0   6   0   38.71    1.10
   0   6   0   38.14    1.10
   0   6   0   39.16    0.98
   0   7   0   -0.21    0.16
   0   7   0   -0.14    0.18
   0   7   0   -0.19    0.17
   0   8   0   63.08    1.56
   0   8   0   63.13    1.75
   0   8   0   66.30    1.78
   0   9   0    0.31    0.25
   0   9   0   -0.06    0.25
   0   9   0    0.03    0.21
   0  10   0   35.90    1.19
   0  10   0   37.03    1.17
   0  10   0   35.39    1.06
   0  10   0   36.43    1.19
   0  11   0   -0.25    0.27
   0  11   0   -0.05    0.24
   0  11   0    0.41    0.26
   0  11   0    0.18    0.28
   0  12   0   -0.06    0.26
   0  12   0   -0.09    0.28
   0  12   0    0.11    0.26
   0  12   0   -0.11    0.23
   0  13   0    0.14    0.27
   0  13   0    0.18    0.30
   0  13   0   -0.10    0.25
   0  13   0   -0.25    0.24
   0  14   0   23.64    1.00
   0  14   0   23.85    1.06
   0  14   0   22.74    0.93
   0  14   0   22.56    1.01
   0   1  -1  162.18    3.82
   0  -1  -1  158.56    3.76
   0   1   1  159.17    3.89
   0  -1  -1  158.35    3.96
   0   1   1  160.03    3.93
   0  -1   1  165.32    3.85
   0   1   1  155.89    3.75
   0  -1   1  162.34    3.78
   0   1  -1  160.70    3.74
   0   1  -1  162.27    3.72
   0   2   1   -0.03    0.07
   0   2   1   -0.08    0.08
   0  -2  -1   -0.03    0.08
   0  -2   1    0.10    0.07
   0  -2  -1   -0.02    0.08
   0   2  -1   -0.02    0.07
   0   2   1    0.01    0.09
   0  -2   1    0.12    0.08
   0   2  -1    0.01    0.08
   0  -3   1  213.06    5.07
   0   3   1  207.49    5.07
   0   3   1  208.89    5.20
   0  -3  -1  215.01    5.00
   0   3  -1  219.64    5.00
   0   3   1  209.11    4.99
   0  -3  -1  217.38    5.07
   0   3  -1  214.76    5.07
   0  -4  -1   -0.14    0.12
   0   4  -1   -0.05    0.12
   0   4   1   -0.05    0.13
   0   4   1    0.00    0.12
   0  -4   1   -0.05    0.11
   0   4  -1    0.01    0.11
   0   4   1    0.34    0.13
   0   5  -1  509.53   11.96
   0   5  -1  508.26   12.24
   0   5   1  522.48   11.96
   0   6   1   -0.31    0.16
   0   6  -1   -0.12    0.14
   0   6   1    0.01    0.15
   0   6  -1   -0.19    0.16
   0   6   1   -0.11    0.17
   0   7   1   21.71    0.76
   0   7  -1   22.05    0.67
   0   7   1   21.56    0.67
   0   7  -1   22.08    0.77
   0   7  -1   22.99    0.76
   0   7   1   22.57    0.76
   0   8   1    0.18    0.19
   0   8   1    0.15    0.20
   0   8  -1   -0.24    0.18
   0  -8   1    0.05    0.26
   0   8  -1   -0.15    0.21
   0   8  -1    0.14    0.21
   0   8   1    0.10    0.23
   0   9  -1   47.41    1.44
   0   9   1   49.62    1.30
   0   9   1   47.95    1.43
   0   9   1   50.81    1.47
   0   9  -1   46.56    1.43
   0   9  -1   49.37    1.29
   0   9  -1   48.30    1.42
   0  10   1   -0.12    0.23
   0  10   1   -0.16    0.25
   0  10  -1   -0.04    0.22
   0  10   1    0.08    0.23
   0  10  -1   -0.17    0.21
   0  10  -1   -0.06    0.24
   0  10  -1   -0.16    0.26
   0  11   1  130.28    3.48
   0  11  -1  135.96    3.13
   0  11   1  140.13    3.16
   0  11   1  130.83    3.45
   0  11  -1  135.60    3.47
   0  11  -1  135.58    3.54
   0  11   1  130.58    3.52
   0  11  -1  134.22    3.50
   0  12   1   -0.09    0.27
   0  12  -1    0.07    0.26
   0  12   1   -0.07    0.27
   0  12   1    0.34    0.28
   0  12  -1   -0.14    0.28
   0  12   1    0.10    0.30
   0  12  -1    0.48    0.28
   0  12  -1   -0.01    0.30
   0  13  -1    7.49    0.55
   0  13   1    7.13    0.52
   0  13   1    8.54    0.61
   0  13  -1    7.66    0.59
   0  13   1    7.53    0.60
   0  13  -1    6.46    0.52
   0  13  -1    7.43    0.54
   0  13   1    7.35    0.57
   0  14  -1    0.28    0.33
   0  14  -1    0.09    0.30
   0  14   1    0.27    0.32
   0  14   1   -0.09    0.31
   0  14   1   -0.24    0.27
   0  14  -1   -0.19    0.30
   0  14  -1   -0.33    0.31
   0  14   1   -0.24    0.28
   0  -1  -2   -0.05    0.08
   0   1   2   -0.03    0.07
   0  -1  -2    0.00    0.06
   0  -1   2   -0.08    0.06
   0   1  -2   -0.05    0.06
   0   1   2   -0.19    0.06
   0  -1   2   -0.04    0.05
   0   1  -2   -0.06    0.05
   0   1  -2   -0.07    0.05
   0  -1  -2   -0.08    0.06
   0  -1   2   -0.04    0.05
   0  -2  -2   11.42    0.39
   0   2  -2   11.36    0.38
   0   2   2   12.44    0.38
   0   2  -2   12.33    0.37
   0   2  -2   12.01    0.37
   0   2   2   12.28    0.37
   0  -2   2   12.96    0.38
   0  -2   2   13.14    0.37
   0   2   2   12.46    0.39
   0  -2  -2   11.37    0.37
   0   3   2   -0.20    0.11
   0   3  -2   -0.05    0.13
   0  -3  -2   -0.14    0.11
   0   3  -2   -0.22    0.10
   0   3  -2   -0.11    0.10
   0   3   2   -0.24    0.10
   0  -3   2   -0.13    0.11
   0  -3   2   -0.19    0.09
   0   3   2   -0.02    0.12
   0  -3  -2    0.02    0.13
   0   4  -2   12.47    0.43
   0  -4   2   13.14    0.43
   0   4   2   13.00    0.46
   0   4  -2   13.02    0.44
   0   4  -2   12.70    0.46
   0   4   2   13.54    0.47
   0  -4  -2   13.03    0.44
   0   4   2   12.89    0.44
   0   5   2    0.03    0.14
   0   5  -2    0.11    0.14
   0   5   2    0.02    0.14
   0   5  -2    0.16    0.14
   0   5  -2    0.13    0.15
   0  -5   2    0.17    0.13
   0   6  -2  151.86    3.79
   0   6  -2  155.94    3.75
   0   6   2  156.34    3.39
   0   6  -2  150.55    3.71
   0   6   2  153.00    3.74
   0   6   2  158.03    3.81
   0   7   2    0.01    0.19
   0   7  -2   -0.08    0.15
   0   7   2    0.14    0.19
   0   7  -2   -0.29    0.17
   0   7   2   -0.16    0.17
   0   7  -2   -0.13    0.19
   0   7  -2    0.01    0.16
   0  -7   2    0.38    0.24
   0   8  -2   59.44    1.63
   0   8   2   58.60    1.46
   0   8  -2   58.98    1.63
   0   8  -2   58.92    1.59
   0   8  -2   58.73    1.43
   0  -8   2   56.91    1.55
   0   8   2   54.84    1.60
   0   8   2   57.02    1.63
   0   9  -2    0.01    0.25
   0  -9   2    0.63    0.32
   0   9   2   -0.20    0.24
   0   9  -2    0.08    0.24
   0   9   2    0.36    0.25
   0   9  -2   -0.13    0.24
   0   9  -2    0.24    0.22
   0   9   2    0.07    0.24
   0  10   2   27.82    0.89
   0  10  -2   28.62    1.00
   0  10  -2   27.55    0.99
   0 -10   2   26.78    0.95
   0  10  -2   26.53    0.96
   0  10   2   26.53    0.97
   0  10  -2   26.39    0.85
   0  10   2   26.79    0.99
   0  11  -2    0.06    0.27
   0  11  -2    0.20    0.27
   0  11   2    0.26    0.26
   0  11   2   -0.08    0.29
   0  11   2    0.03    0.26
   0  11  -2    0.09    0.25
   0  11  -2    0.37    0.29
   0  12  -2    7.42    0.52
   0  12   2    7.01    0.52
   0  12  -2    6.43    0.57
   0  12  -2    6.82    0.50
   0  12  -2    6.02    0.54
   0  12   2    7.28    0.57
   0  12   2    6.72    0.55
   0  12   2    7.25    0.55
   0  13  -2   -0.05    0.27
   0  13   2    0.19    0.27
   0  13  -2    0.16    0.29
   0  13  -2   -0.46    0.27
   0  13  -2   -0.27    0.29
   0  13   2    0.10    0.32
   0  13   2    0.06    0.30
   0  13   2   -0.10    0.25
   0  14   2   33.39    1.27
   0  14   2   31.72    1.12
   0  14  -2   29.80    1.24
   0  14  -2   31.28    1.21
   0  14   2   31.93    1.26
   0  14  -2   30.44    1.23
   0  14  -2   30.55    1.08
   0  14   2   32.87    1.24
   0   0   3   -0.50    0.07
   0   0   3   -0.39    0.07
   0   0  -3   -0.45    0.11
   0   0  -3   -0.49    0.07
   0   0   3   -0.41    0.11
   0   1  -3  124.73    2.98
   0  -1   3  127.24    2.94
   0   1  -3  130.43    2.95
   0   1   3  125.82    3.00
   0  -1  -3  124.89    3.09
   0  -1  -3  125.52    2.99
   0  -1   3  125.02    2.98
   0   1   3  125.70    3.09
   0  -1   3  123.94    2.92
   0   2   3    0.11    0.10
   0  -2   3   -0.04    0.08
   0   2   3    0.10    0.09
   0   2  -3    0.37    0.11
   0   2  -3    0.05    0.08
   0  -2  -3    0.26    0.12
   0  -2  -3    0.12    0.09
   0  -2  -3    0.13    0.09
   0   2  -3    0.05    0.08
   0  -2   3    0.03    0.09
   0  -2   3    0.08    0.08
   0   3  -3   38.82    1.01
   0   3  -3   37.77    1.03
   0   3   3   42.39    1.07
   0   3   3   41.00    1.05
   0  -3   3   41.25    1.03
   0  -3   3   41.11    1.03
   0  -3  -3   38.55    1.07
   0  -3  -3   38.45    1.02
   0   3   3   41.55    1.03
   0   3  -3   38.38    1.03
   0   4  -3    0.01    0.12
   0   4   3    0.03    0.12
   0  -4  -3    0.15    0.14
   0  -4   3   -0.12    0.10
   0   4  -3    0.01    0.11
   0   4  -3    0.23    0.11
   0   4   3    0.06    0.12
   0   5   3  257.55    6.16
   0   5  -3  262.60    6.12
   0   5   3  255.57    5.59
   0  -5   3  263.23    6.24
   0   5   3  264.91    6.26
   0   5  -3  259.48    6.24
   0   5  -3  263.24    6.17
   0   6  -3    0.13    0.14
   0   6   3   -0.08    0.15
   0   6   3    0.11    0.17
   0   6   3    0.11    0.16
   0   6  -3    0.09    0.14
   0   6  -3    0.06    0.19
   0  -6   3    0.29    0.20
   0   7  -3    1.08    0.21
   0   7   3    1.20    0.22
   0   7   3    1.16    0.23
   0  -7   3    1.29    0.28
   0   7   3    1.59    0.24
   0   7  -3    1.62    0.26
   0   7  -3    1.18    0.20
   0   7  -3    1.31    0.21
   0   8   3   -0.01    0.23
   0   8   3   -0.03    0.23
   0  -8   3   -0.34    0.27
   0   8  -3    0.03    0.19
   0   8  -3    0.01    0.23
   0   8  -3   -0.08    0.19
   0   8  -3   -0.16    0.19
   0   8   3    0.16    0.22
   0   9  -3   86.82    2.27
   0  -9   3   87.20    2.22
   0   9  -3   86.46    2.30
   0   9   3   83.47    2.32
   0   9  -3   86.10    2.31
   0   9   3   85.83    2.08
   0   9  -3   84.79    2.02
   0   9   3   84.23    2.29
   0 -10   3   -0.49    0.29
   0  10   3   -0.40    0.24
   0  10   3   -0.27    0.23
   0  10  -3   -0.23    0.26
   0  10  -3   -0.06    0.23
   0  10  -3   -0.02    0.22
   0  10   3   -0.22    0.24
   0  10  -3   -0.34    0.23
   0  11  -3  114.79    3.00
   0  11   3  112.26    3.07
   0  11  -3  115.70    3.07
   0  11  -3  112.99    2.69
   0  11   3  115.67    2.76
   0  11   3  116.51    3.05
   0  11  -3  112.24    3.04
   0  12  -3    0.13    0.27
   0  12  -3   -0.29    0.28
   0  12   3    0.04    0.30
   0  12  -3   -0.08    0.28
   0  12   3   -0.40    0.25
   0  12  -3    0.17    0.28
   0  12   3    0.17    0.31
   0  13  -3   14.03    0.78
   0  13  -3   14.07    0.72
   0  13   3   12.94    0.69
   0  13   3   11.69    0.71
   0  13  -3   13.50    0.63
   0  13   3   12.42    0.74
   0  13   3   12.99    0.75
   0  13  -3   12.87    0.72
   0  14   3   -0.20    0.35
   0  14   3   -0.50    0.27
   0  14  -3    0.00    0.30
   0  14  -3    0.13    0.31
   0  14   3    0.21    0.29
   0   0  -4  951.44   23.00
   0   0   4 1000.00   23.06
   0   0   4  988.98   23.83
   0   0  -4  944.47   23.83
   0   0   4  990.77   23.05
   0   1  -4    0.04    0.07
   0   1  -4    0.08    0.13
   0  -1   4    0.06    0.07
   0   1  -4   -0.04    0.08
   0  -1  -4    0.15    0.12
   0   1   4   -0.04    0.10
   0   1   4    0.11    0.09
   0  -1  -4    0.17    0.08
   0   1   4    0.03    0.07
   0   2  -4  120.36    2.95
   0  -2  -4  121.09    3.00
   0   2   4  130.56    3.10
   0  -2  -4  119.81    3.10
   0  -2  -4  121.73    2.95
   0   2  -4  122.32    2.99
   0  -2   4  129.44    2.93
   0  -2   4  128.90    2.99
   0  -2   4  127.33    2.95
   0   2   4  129.85    3.01
   0   3  -4    0.02    0.12
   0  -3   4    0.10    0.11
   0   3  -4    0.08    0.10
   0   3   4   -0.01    0.11
   0  -3  -4   -0.14    0.11
   0  -3   4   -0.03    0.09
   0  -3  -4    0.02    0.14
   0   3   4   -0.06    0.11
   0   3  -4   -0.02    0.10
   0   4  -4    9.06    0.38
   0   4  -4    8.94    0.34
   0   4   4    7.95    0.35
   0   4   4    8.75    0.36
   0  -4   4    8.50    0.35
   0  -4  -4    9.37    0.41
   0   4  -4    8.83    0.36
   0   5   4    0.05    0.15
   0  -5  -4    0.08    0.17
   0  -5   4   -0.06    0.12
   0   5   4    0.29    0.16
   0   5  -4    0.46    0.16
   0   5   4    0.03    0.15
   0  -5   4    0.42    0.19
   0   5  -4   -0.08    0.16
   0   5  -4    0.23    0.14
   0   6  -4  195.35    4.59
   0   6   4  187.10    4.16
   0   6  -4  187.44    4.53
   0   6  -4  190.57    4.62
   0  -6   4  186.27    4.48
   0   6   4  190.07    4.65
   0  -6   4  197.91    4.63
   0   6   4  186.48    4.57
   0   7  -4   -0.30    0.19
   0  -7   4   -0.20    0.24
   0   7   4   -0.12    0.20
   0   7  -4   -0.07    0.18
   0   7  -4   -0.18    0.18
   0   7   4   -0.10    0.18
   0   7  -4   -0.14    0.17
   0   7   4   -0.04    0.20
   0   8  -4   22.30    0.66
   0   8  -4   23.60    0.82
   0   8   4   19.38    0.77
   0  -8   4   19.69    0.78
   0   8   4   19.03    0.76
   0   8   4   19.52    0.71
   0   8  -4   21.84    0.76
   0   8  -4   22.58    0.78
   0   9  -4    0.24    0.27
   0   9   4    0.14    0.22
   0   9  -4   -0.09    0.20
   0   9  -4    0.05    0.22
   0   9   4    0.08    0.24
   0   9  -4    0.25    0.24
   0   9   4    0.06    0.24
   0  -9   4    0.31    0.28
   0  10  -4   26.87    1.00
   0  10  -4   26.78    0.83
   0  10   4   27.65    0.91
   0  10  -4   27.80    0.96
   0  10   4   27.19    0.99
   0 -10   4   27.52    0.97
   0  10  -4   27.69    0.98
   0  10   4   27.35    0.98
   0  11   4    0.04    0.28
   0  11  -4    0.15    0.25
   0  11  -4   -0.14    0.24
   0 -11   4   -0.19    0.33
   0  11  -4    0.01    0.27
   0  11   4   -0.09    0.24
   0  11  -4   -0.33    0.25
   0  11   4    0.00    0.27
   0  12   4    1.03    0.33
   0  12   4    1.03    0.32
   0  12   4    0.72    0.30
   0 -12   4    1.00    0.37
   0  12  -4    0.91    0.34
   0  12  -4    1.49    0.31
   0  12  -4    1.27    0.31
   0  12  -4    1.22    0.34
   0  13   4   -0.06    0.30
   0  13  -4   -0.02    0.27
   0  13   4   -0.26    0.29
   0  13  -4    0.31    0.34
   0  13   4   -0.14    0.30
   0  14  -4   24.22    0.89
   0  14   4   23.72    1.00
   0   0  -5   -0.37    0.08
   0   0   5   -0.34    0.08
   0   0   5   -0.19    0.07
   0   0   5   -0.44    0.11
   0   0  -5   -0.41    0.07
   0   0  -5   -0.54    0.12
   0  -1  -5   94.40    2.24
   0   1  -5   93.23    2.20
   0   1  -5   94.61    2.37
   0   1   5   93.73    2.34
   0  -1  -5   93.17    2.35
   0  -1   5   92.61    2.23
   0   1   5   92.60    2.24
   0   1   5   91.09    2.25
   0   1  -5   91.58    2.23
   0  -2  -5   -0.01    0.09
   0   2  -5    0.10    0.14
   0   2   5    0.13    0.10
   0   2  -5    0.07    0.09
   0   2  -5    0.12    0.11
   0   2   5   -0.04    0.12
   0  -2   5    0.06    0.08
   0  -2  -5    0.21    0.14
   0  -2   5    0.03    0.08
   0  -2   5    0.12    0.09
   0   2   5   -0.05    0.10
   0  -3  -5   62.10    1.47
   0  -3   5   57.52    1.48
   0   3  -5   61.31    1.48
   0   3  -5   60.17    1.49
   0  -3  -5   59.83    1.57
   0   3   5   55.42    1.51
   0  -3   5   58.53    1.48
   0   4  -5    0.01    0.13
   0  -4   5   -0.01    0.18
   0  -4   5   -0.06    0.11
   0   4  -5   -0.05    0.15
   0   4  -5   -0.17    0.12
   0   4   5   -0.08    0.13
   0  -4  -5    0.06    0.17
   0   5   5  413.71    8.85
   0  -5   5  431.67    9.86
   0  -5  -5  411.01   10.14
   0   5  -5  411.19    9.74
   0   5  -5  422.49    9.66
   0   5  -5  420.29    9.86
   0   5   5  403.45    9.89
   0   6  -5   -0.04    0.19
   0   6   5   -0.05    0.19
   0  -6   5   -0.03    0.17
   0  -6   5    0.17    0.25
   0   6   5   -0.24    0.18
   0  -6  -5    0.41    0.22
   0   6  -5    0.21    0.17
   0   6  -5    0.48    0.19
   0   7  -5   43.87    1.24
   0   7   5   44.89    1.18
   0  -7   5   45.07    1.28
   0   7  -5   43.69    1.27
   0   7   5   43.28    1.26
   0   7  -5   42.45    1.26
   0   7   5   44.10    1.30
   0  -8   5   -0.53    0.29
   0   8  -5   -0.03    0.19
   0   8  -5    0.13    0.22
   0   8   5   -0.08    0.20
   0   8   5   -0.12    0.21
   0   8   5   -0.44    0.22
   0   8  -5   -0.03    0.26
   0   8  -5    0.23    0.22
   0   9  -5   13.28    0.59
   0   9  -5   13.43    0.60
   0   9  -5   11.93    0.61
   0   9   5   11.86    0.60
   0  -9   5   11.29    0.62
   0   9  -5   12.87    0.50
   0   9   5   11.79    0.56
   0   9   5   11.02    0.58
   0  10  -5   -0.05    0.22
   0  10  -5    0.32    0.28
   0  10  -5   -0.04    0.23
   0  10  -5   -0.12    0.23
   0 -10   5   -0.29    0.28
   0  10   5   -0.28    0.24
   0  10   5   -0.08    0.25
   0  11  -5   45.10    1.49
   0  11   5   45.87    1.52
   0  11  -5   47.02    1.27
   0  11   5   49.59    1.39
   0 -11   5   49.85    1.47
   0  12   5   -0.22    0.27
   0  12  -5    0.05    0.26
   0  12  -5   -0.02    0.27
   0  12   5    0.00    0.29
   0 -12   5   -0.12    0.35
   0  13   5    3.70    0.46
   0  13   5    4.32    0.49
   0  13   5    4.05    0.49
   0 -13   5    3.41    0.49
   0  13  -5    4.80    0.51
   0  13  -5    4.50    0.42
   0   0  -6  398.67    9.57
   0   0   6  423.15    9.79
   0   0   6  420.52    9.75
   0   0  -6  427.85    9.73
   0   0  -6  401.53   10.07
   0  -1   6   -0.05    0.08
   0   1  -6    0.46    0.17
   0  -1   6   -0.08    0.09
   0   1  -6   -0.07    0.09
   0   1  -6   -0.05    0.09
   0   1   6    0.08    0.10
   0  -1  -6    0.14    0.16
   0   1   6    0.01    0.09
   0   2   6  164.06    3.89
   0  -2   6  165.82    3.82
   0   2   6  159.46    3.89
   0   2  -6  158.49    3.86
   0  -2  -6  170.04    3.81
   0  -2   6  159.37    3.78
   0   2  -6  164.27    3.82
   0  -2   6  159.95    3.86
   0  -2  -6  159.44    4.03
   0   2  -6  161.68    4.07
   0   3  -6    0.14    0.10
   0  -3   6   -0.02    0.10
   0  -3   6   -0.09    0.10
   0   3   6    0.15    0.12
   0  -3  -6   -0.07    0.16
   0   3  -6    0.02    0.13
   0  -3  -6    0.07    0.12
   0  -4   6    6.57    0.39
   0   4   6    5.41    0.30
   0  -4  -6    6.54    0.37
   0   4  -6    6.80    0.34
   0   4  -6    6.42    0.30
   0   4   6    6.05    0.33
   0  -4   6    6.30    0.30
   0  -5  -6    0.10    0.21
   0   5  -6    0.04    0.15
   0   5  -6    0.01    0.18
   0   5  -6    0.26    0.15
   0  -5   6    0.00    0.14
   0  -5   6    0.38    0.23
   0   5   6    0.01    0.17
   0   5   6    0.03    0.16
   0   6   6  100.22    2.34
   0   6  -6  102.09    2.52
   0  -6   6  103.10    2.56
   0   6  -6  101.41    2.56
   0  -6   6  105.53    2.57
   0  -6  -6  103.00    2.66
   0   6   6   97.95    2.60
   0   6  -6  100.07    2.57
   0   7  -6    0.07    0.20
   0   7   6   -0.27    0.23
   0  -7  -6    0.33    0.27
   0  -7   6   -0.38    0.28
   0   7  -6   -0.16    0.23
   0   7   6    0.10    0.22
   0   7  -6    0.08    0.21
   0   8  -6   11.29    0.42
   0  -8   6    9.92    0.56
   0   8  -6   10.94    0.56
   0   8  -6   10.33    0.51
   0   8   6    9.61    0.53
   0   8  -6   10.57    0.52
   0   8   6    9.28    0.52
   0   9  -6   -0.10    0.20
   0  -9   6    0.19    0.29
   0   9   6   -0.01    0.20
   0   9  -6   -0.34    0.17
   0   9   6   -0.11    0.23
   0   9  -6   -0.02    0.21
   0   9  -6    0.31    0.26
   0  10  -6   34.37    0.96
   0  10   6   35.06    1.19
   0  10  -6   35.07    1.18
   0  10   6   34.40    1.08
   0 -10   6   31.99    1.13
   0  11   6    0.29    0.31
   0 -11   6    0.38    0.35
   0  11  -6    0.02    0.23
   0  11   6    0.15    0.26
   0  11  -6   -0.29    0.28
   0  12   6   -0.15    0.27
   0  12   6    0.03    0.29
   0 -12   6   -0.30    0.36
   0  12  -6   -0.04    0.27
   0  13   6   -0.42    0.27
   0  13   6   -0.34    0.30
   0  13  -6   -0.25    0.32
   0 -13   6    0.16    0.39
   0   0   7   -0.02    0.09
   0   0   7    0.05    0.16
   0   0   7    0.44    0.10
   0   0  -7    0.05    0.16
   0   0  -7   -0.07    0.08
   0   1   7   27.11    0.76
   0   1  -7   30.17    0.74
   0  -1   7   27.05    0.84
   0  -1   7   28.68    0.75
   0  -1   7   27.87    0.75
   0  -1  -7   29.77    0.87
   0   1  -7   29.88    0.75
   0   1  -7   29.24    0.88
   0   1   7   27.50    0.77
   0   2   7   -0.02    0.12
   0  -2   7   -0.03    0.09
   0  -2   7   -0.04    0.17
   0   2  -7    0.02    0.11
   0   2   7    0.10    0.11
   0  -2  -7    0.27    0.17
   0  -2  -7   -0.02    0.10
   0  -2   7    0.03    0.09
   0   2  -7   -0.01    0.09
   0   2  -7    0.22    0.18
   0   3   7   77.67    1.97
   0   3  -7   79.09    2.12
   0   3   7   76.74    1.98
   0  -3  -7   80.47    2.07
   0   3  -7   78.63    1.93
   0  -3   7   79.47    1.90
   0  -3   7   78.45    1.94
   0  -3  -7   79.30    1.92
   0   3  -7   76.70    1.94
   0   4   7   -0.16    0.16
   0  -4   7    0.04    0.12
   0  -4  -7   -0.01    0.20
   0   4  -7    0.19    0.17
   0   4  -7    0.10    0.14
   0  -4   7    0.09    0.22
   0   4   7    0.35    0.16
   0   5   7  152.12    3.75
   0  -5   7  151.16    3.68
   0   5   7  148.65    3.36
   0  -5  -7  150.12    3.85
   0   5  -7  151.05    3.70
   0   5  -7  150.46    3.68
   0  -5   7  159.34    3.71
   0  -6  -7    0.02    0.24
   0  -6   7    0.05    0.17
   0  -6   7   -0.09    0.27
   0   6   7    0.08    0.20
   0   6  -7   -0.32    0.21
   0   6  -7    0.28    0.19
   0   6   7   -0.09    0.21
   0   6   7   -0.16    0.21
   0  -7  -7   24.39    0.87
   0   7  -7   23.63    0.82
   0   7   7   22.43    0.82
   0   7  -7   23.07    0.78
   0   7   7   24.37    0.77
   0   7  -7   22.75    0.77
   0  -7   7   23.29    0.86
   0   8   7   -0.21    0.23
   0   8  -7   -0.31    0.22
   0   8  -7    0.10    0.20
   0   8   7    0.10    0.20
   0   8  -7    0.04    0.20
   0  -8   7    0.25    0.28
   0  -9   7   28.35    1.00
   0   9   7   27.91    0.92
   0   9   7   27.24    0.99
   0   9  -7   27.43    0.96
   0  10   7   -0.35    0.26
   0 -10   7   -0.20    0.31
   0  10  -7   -0.14    0.27
   0  10   7   -0.06    0.22
   0  11  -7   56.75    1.76
   0  11   7   59.37    1.64
   0  11   7   59.65    1.81
   0 -11   7   58.76    1.75
   0  12   7   -0.24    0.33
   0  12   7   -0.28    0.28
   0 -12   7   -0.09    0.38
   0  12  -7   -0.19    0.31
   0  13   7    9.17    0.65
   0 -13   7    8.61    0.71
   0  13  -7   10.11    0.69
   0  13   7    9.85    0.68
   0   0   8  192.24    4.50
   0   0   8  193.77    4.49
   0   0  -8  192.13    4.73
   0   0   8  184.86    4.47
   0   0  -8  181.44    4.40
   0  -1  -8    0.01    0.18
   0   1   8    0.14    0.12
   0   1  -8   -0.09    0.10
   0  -1   8    0.04    0.10
   0   1  -8   -0.12    0.18
   0   1   8    0.06    0.10
   0   1   8    0.06    0.20
   0  -1   8    0.02    0.10
   0  -1  -8    0.18    0.10
   0   1  -8    0.01    0.10
   0  -1   8    0.05    0.19
   0   2  -8    1.59    0.15
   0   2   8    1.28    0.16
   0  -2   8    1.05    0.13
   0  -2   8    0.95    0.13
   0   2  -8    1.52    0.25
   0  -2  -8    1.77    0.25
   0   2   8    0.93    0.22
   0   2   8    1.60    0.17
   0  -2   8    0.85    0.24
   0  -2   8    1.05    0.13
   0   2  -8    1.85    0.16
   0   3  -8   -0.13    0.15
   0   3   8   -0.16    0.12
   0   3   8    0.03    0.14
   0   3  -8   -0.05    0.20
   0  -3   8    0.03    0.11
   0   3  -8    0.08    0.12
   0  -3  -8    0.11    0.13
   0   3   8    0.11    0.20
   0  -3  -8    0.37    0.22
   0  -3   8    0.29    0.12
   0   4   8   39.22    1.13
   0  -4  -8   42.32    1.21
   0   4   8   39.95    1.14
   0  -4   8   42.06    1.10
   0   4   8   38.35    1.03
   0   4  -8   41.83    1.11
   0   4  -8   41.15    1.27
   0   4   8   42.55    1.15
   0   4  -8   39.54    1.09
   0   5   8    0.04    0.18
   0  -5  -8    0.14    0.26
   0   5   8    0.30    0.23
   0   5  -8    0.00    0.20
   0   5   8   -0.26    0.20
   0  -5   8   -0.01    0.15
   0   5  -8    0.13    0.17
   0   6   8  105.84    2.59
   0   6  -8  104.52    2.66
   0  -6   8  102.50    2.69
   0  -6  -8  105.76    2.78
   0   6   8  104.05    2.71
   0   6   8  105.22    2.44
   0   6  -8  109.14    2.66
   0   7   8    0.30    0.23
   0   7   8   -0.13    0.21
   0  -7   8   -0.19    0.26
   0   7  -8    0.10    0.22
   0   7   8   -0.28    0.18
   0  -7  -8    0.02    0.26
   0   8   8   34.06    1.15
   0  -8   8   36.15    1.18
   0   8   8   35.26    1.06
   0  -8  -8   37.65    1.17
   0   8  -8   37.81    1.15
   0   8   8   35.97    1.05
   0  -9   8   -0.23    0.30
   0   9   8   -0.05    0.22
   0   9   8   -0.24    0.23
   0   9  -8   -0.02    0.24
   0 -10   8    7.78    0.58
   0  10  -8    5.97    0.51
   0  10   8    6.39    0.53
   0  10   8    6.75    0.51
   0  11   8    0.04    0.27
   0 -11   8    0.42    0.35
   0  11   8   -0.25    0.29
   0  11  -8    0.24    0.30
   0 -12   8    3.83    0.51
   0  12   8    4.75    0.51
   0  12  -8    4.43    0.50
   0  12   8    3.78    0.47
   0   0  -9    0.04    0.22
   0   0   9    0.25    0.12
   0   0   9    0.63    0.12
   0   0   9    0.16    0.24
   0   0  -9    0.22    0.10
   0  -1  -9   17.45    0.49
   0  -1   9   18.23    0.52
   0  -1  -9   17.18    0.67
   0   1   9   18.08    0.54
   0   1  -9   16.70    0.49
   0   1  -9   17.94    0.53
   0  -1   9   17.35    0.68
   0   1  -9   17.85    0.69
   0   1   9   16.80    0.66
   0  -1   9   18.12    0.52
   0  -1  -9   16.70    0.48
   0   1   9   17.58    0.54
   0  -1   9   17.16    0.49
   0   2  -9   -0.05    0.12
   0  -2  -9   -0.04    0.12
   0   2  -9    0.13    0.23
   0  -2   9    0.00    0.23
   0   2   9   -0.08    0.12
   0   2   9   -0.31    0.20
   0  -2   9   -0.21    0.11
   0   2   9    0.13    0.14
   0  -2   9   -0.06    0.10
   0  -2  -9   -0.20    0.23
   0   2  -9    0.11    0.13
   0  -2   9   -0.11    0.11
   0  -3  -9   58.86    1.58
   0  -3  -9   57.85    1.40
   0   3   9   53.57    1.45
   0   3   9   53.12    1.31
   0   3  -9   53.48    1.60
   0   3  -9   56.54    1.41
   0   3   9   55.94    1.46
   0   3   9   52.85    1.48
   0  -3   9   55.77    1.41
   0   3  -9   55.48    1.41
   0  -4  -9    0.24    0.26
   0   4  -9    0.15    0.19
   0   4   9   -0.08    0.19
   0   4   9   -0.13    0.19
   0   4  -9    0.36    0.28
   0   4  -9    0.11    0.15
   0   4   9    0.00    0.23
   0  -4   9    0.12    0.14
   0  -5  -9  202.97    5.07
   0  -5   9  202.09    4.87
   0   5   9  207.98    4.78
   0   5   9  199.68    4.42
   0   5  -9  204.73    4.82
   0   5   9  199.35    4.92
   0   5  -9  193.06    5.16
   0   6   9   -0.34    0.20
   0   6  -9   -0.31    0.27
   0   6   9   -0.16    0.18
   0  -6   9    0.15    0.28
   0   6   9    0.11    0.23
   0   6  -9   -0.37    0.20
   0  -6  -9    0.16    0.26
   0   7  -9    7.03    0.45
   0  -7   9    6.22    0.50
   0   7   9    7.13    0.43
   0   7   9    6.61    0.43
   0   7   9    5.83    0.41
   0  -7  -9    6.39    0.50
   0   8   9   -0.20    0.22
   0  -8   9    0.10    0.30
   0   8   9    0.28    0.22
   0   8  -9   -0.38    0.22
   0  -8  -9   -0.21    0.25
   0  -9   9   34.49    1.22
   0   9   9   35.70    1.20
   0   9  -9   34.97    1.17
   0   9   9   37.86    1.13
   0 -10   9    0.32    0.36
   0  10   9   -0.51    0.25
   0  10   9    0.39    0.27
   0  10  -9   -0.26    0.28
   0 -11   9   33.16    1.21
   0  11   9   32.73    1.12
   0  11   9   32.59    1.20
   0  11  -9   32.18    1.17
   0 -12   9    0.25    0.44
   0   0  10  327.34    7.58
   0   0  10  332.95    7.66
   0   0 -10  312.47    7.50
   0   0 -10  316.91    8.02
   0   0  10  331.32    7.65
   0   1  10    0.25    0.14
   0  -1  10   -0.03    0.10
   0  -1 -10    0.23    0.11
   0  -1  10   -0.33    0.13
   0  -1  10   -0.05    0.26
   0  -1 -10   -0.42    0.24
   0   1  10   -0.01    0.26
   0   1 -10    0.14    0.25
   0   1  10    0.18    0.14
   0  -1  10   -0.48    0.12
   0   2  10   73.90    1.95
   0  -2  10   76.39    1.80
   0   2  10   74.69    1.89
   0  -2 -10   76.95    2.06
   0  -2  10   76.78    1.84
   0  -2  10   74.19    1.84
   0   2 -10   72.18    1.81
   0  -2  10   72.12    1.99
   0   2  10   73.14    1.88
   0   2 -10   74.72    2.08
   0   3 -10    0.05    0.16
   0   3  10    0.03    0.16
   0  -3  10   -0.15    0.24
   0   3  10   -0.04    0.14
   0   3 -10    0.21    0.27
   0  -3  10    0.16    0.13
   0   3  10   -0.38    0.22
   0  -3 -10    0.16    0.25
   0   4 -10    7.77    0.54
   0  -4 -10    7.73    0.49
   0   4 -10    7.60    0.38
   0   4  10    7.74    0.41
   0   4  10    9.03    0.47
   0  -4  10    7.46    0.50
   0   4  10    9.07    0.40
   0  -5  10   -0.05    0.26
   0  -5 -10    0.06    0.26
   0   5 -10    0.10    0.20
   0   5 -10   -0.13    0.24
   0   5  10    0.23    0.20
   0   5  10    0.29    0.23
   0   5  10    0.01    0.18
   0   6 -10   52.75    1.45
   0   6  10   51.36    1.48
   0   6 -10   49.12    1.62
   0   6  10   51.41    1.44
   0   6  10   53.91    1.36
   0  -6  10   51.77    1.55
   0  -6 -10   53.91    1.56
   0   7 -10   -0.03    0.21
   0   7  10   -0.26    0.23
   0   7 -10   -0.39    0.29
   0  -7  10   -0.02    0.30
   0   7  10    0.15    0.21
   0  -7 -10   -0.41    0.25
   0   7  10    0.10    0.23
   0   8  10   45.98    1.45
   0   8 -10   47.70    1.61
   0  -8  10   47.48    1.52
   0   8  10   46.51    1.33
   0   8 -10   51.25    1.44
   0  -8 -10   50.51    1.50
   0   9  10   -0.09    0.24
   0   9  10   -0.33    0.21
   0   9 -10    0.12    0.26
   0  -9  10   -0.49    0.30
   0  10  10   12.08    0.65
   0  10 -10   10.90    0.63
   0  10  10   13.24    0.67
   0 -10  10   11.35    0.72
   0 -11  10   -0.07    0.41
   0  11 -10   -0.34    0.29
   0  11  10    0.30    0.29
   0  11  10   -0.14    0.31
   0   0  11    0.21    0.24
   0   0 -11    0.48    0.26
   0   1  11   11.46    0.41
   0   1  11   11.00    0.55
   0  -1  11   12.48    0.39
   0  -1 -11   12.02    0.58
   0  -1  11   11.48    0.58
   0   1 -11   10.63    0.58
   0  -2  11    0.10    0.27
   0   2  11   -0.04    0.13
   0   2  11   -0.25    0.22
   0  -2 -11   -0.15    0.24
   0   2 -11   -0.15    0.25
   0  -2  11    0.04    0.11
   0   3  11   88.77    2.24
   0  -3 -11   89.53    2.39
   0  -3  11   90.95    2.17
   0   3  11   84.09    2.27
   0   3 -11   88.53    2.45
   0  -3  11   87.00    2.33
   0   4  11   -0.03    0.24
   0  -4 -11    0.13    0.25
   0   4 -11   -0.44    0.25
   0   4  11    0.03    0.17
   0   4  11    0.27    0.20
   0  -4  11    0.05    0.13
   0  -4  11    0.08    0.29
   0   5  11  128.61    3.21
   0   5 -11  126.03    3.50
   0  -5  11  127.26    3.31
   0  -5 -11  130.07    3.41
   0   5  11  132.50    3.28
   0   5  11  134.80    2.96
   0   6  11   -0.03    0.20
   0  -6  11    0.06    0.33
   0   6  11   -0.22    0.24
   0  -6 -11   -0.03    0.29
   0   6  11   -0.10    0.23
   0   6 -11   -0.01    0.31
   0  -7 -11   21.71    0.84
   0  -7  11   20.57    0.88
   0   7  11   20.59    0.78
   0   7  11   20.94    0.75
   0   7  11   21.23    0.77
   0   7 -11   18.44    0.88
   0   8  11    0.11    0.25
   0   8  11   -0.09    0.20
   0   8 -11   -0.19    0.30
   0  -8  11   -0.02    0.35
   0   9  11   13.15    0.65
   0   9  11   12.15    0.63
   0  -9  11   13.38    0.76
   0   9 -11   12.17    0.77
   0  10  11   -0.05    0.30
   0  10 -11   -0.14    0.32
   0  10  11    0.11    0.26
   0 -10  11   -0.11    0.37
   0   0 -12   73.22    2.04
   0   0  12   71.55    1.77
   0   0  12   69.12    1.95
   0   1 -12   -0.13    0.25
   0   1  12   -0.10    0.12
   0   1  12    0.51    0.27
   0  -1  12   -0.15    0.24
   0  -1 -12   -0.22    0.24
   0  -1  12   -0.32    0.10
   0  -2  12   35.47    1.19
   0   2 -12   36.31    1.22
   0  -2 -12   37.90    1.20
   0   2  12   36.18    1.16
   0  -2  12   35.77    0.95
   0   2  12   38.18    1.02
   0  -3 -12   -0.12    0.25
   0   3 -12    0.00    0.26
   0  -3  12    0.09    0.11
   0   3  12    0.02    0.24
   0   3  12    0.00    0.15
   0  -3  12    0.19    0.27
   0   4 -12   11.81    0.67
   0  -4  12   12.17    0.66
   0  -4  12   12.29    0.43
   0   4  12   12.40    0.52
   0   4  12   12.38    0.60
   0  -4 -12   13.01    0.63
   0   5  12   -0.14    0.18
   0  -5  12    0.10    0.14
   0  -5  12    0.25    0.30
   0   5  12    0.18    0.27
   0   5 -12    0.48    0.32
   0   5  12    0.19    0.21
   0  -5 -12    0.20    0.27
   0   6  12   71.96    1.90
   0  -6 -12   67.53    1.99
   0   6  12   69.96    1.73
   0   6 -12   66.33    2.10
   0  -6  12   69.78    2.01
   0   6  12   69.56    1.90
   0  -7  12   -0.15    0.32
   0   7  12    0.24    0.25
   0   7  12    0.13    0.26
   0   7 -12   -0.24    0.28
   0   7  12   -0.24    0.20
   0   8  12   28.22    0.99
   0   8  12   27.86    0.93
   0  -8  12   25.97    1.08
   0   8 -12   26.78    1.14
   0   9 -12   -0.09    0.35
   0   9  12   -0.58    0.26
   0  -9  12    0.37    0.39
   0   9  12    0.12    0.25
   0   0  13    0.40    0.29
   0   0  13    0.17    0.10
   0   0 -13   -0.05    0.25
   0  -1  13    3.52    0.43
   0   1  13    4.01    0.24
   0   1 -13    3.27    0.40
   0   1  13    3.69    0.40
   0  -1 -13    3.76    0.41
   0   2  13   -0.04    0.27
   0  -2  13    0.09    0.30
   0   2 -13   -0.50    0.25
   0  -2 -13   -0.13    0.27
   0   2  13    0.10    0.14
   0   3 -13   32.04    1.13
   0  -3  13   29.18    1.08
   0   3  13   29.91    0.89
   0  -3  13   30.03    0.79
   0   3  13   28.14    1.02
   0  -3 -13   31.92    1.09
   0  -4 -13   -0.22    0.28
   0   4  13    0.21    0.26
   0  -4  13    0.13    0.32
   0   4 -13   -0.26    0.28
   0   4  13   -0.14    0.15
   0  -4  13    0.00    0.12
   0   5  13   54.49    1.48
   0   5 -13   45.26    1.66
   0  -5  13   53.96    1.64
   0   5  13   55.22    1.55
   0  -5  13   52.49    1.36
   0  -6  13   -0.20    0.31
   0   6  13    0.12    0.26
   0   6  13    0.11    0.19
   0  -6  13    0.06    0.15
   0   6 -13    0.46    0.33
   0   7  13    0.80    0.26
   0  -7  13    0.92    0.41
   0   7  13    0.50    0.23
   0   7 -13    0.92    0.37
   0   8  13   -0.35    0.22
   0   8  13   -0.47    0.25
   0   8 -13    0.10    0.32
   0  -8  13   -0.13    0.37
   0   0 -14   58.84    1.82
   0   0  14   61.14    1.78
   0  -1 -14   -0.08    0.27
   0  -1  14    0.12    0.30
   0   1  14   -0.24    0.29
   0   1 -14   -0.49    0.26
   0   2  14   16.65    0.75
   0   2 -14   15.93    0.78
   0  -2  14   13.91    0.75
   0  -2 -14   15.64    0.74
   0   2  14   16.07    0.52
   0  -3 -14    0.12    0.28
   0  -3  14   -0.56    0.30
   0   3  14   -0.24    0.13
   0   3  14   -0.14    0.27
   0   3 -14    0.02    0.29
   0   4 -14    7.70    0.61
   0   4  14    7.98    0.56
   0  -4  14    7.22    0.62
   0   4  14    8.09    0.41
   0   5 -14    0.00    0.33
   0   5  14    0.12    0.20
   0  -5  14    0.02    0.37
   0   5  14    0.24    0.28
   0  -6  14   33.58    1.28
   0   6 -14   35.12    1.35
   0   6  14   36.31    1.18
   0   6  14   36.20    1.12
   0   7 -14   -0.01    0.35
   0  -7  14    0.07    0.38
   0   7  14   -0.25    0.20
   0   0 -15    0.00    0.31
   0   0  15    0.64    0.34
   0  -1 -15    1.92    0.38
   0  -1  15    3.12    0.45
   0   1  15    1.72    0.40
   0   1 -15    2.22    0.41
   0   2 -15    0.32    0.33
   0  -2  15    0.28    0.34
   0   2  15    0.38    0.33
   0   3  15   45.55    1.43
   0  -3  15   40.60    1.45
   0   3 -15   45.75    1.53
   0   4 -15    0.23    0.34
   0   4  15   -0.07    0.30
   0  -4  15    0.40    0.38
   0   5  15   47.39    1.34
   0   5 -15   45.73    1.64
   0  -5  15   46.89    1.61
   0   5  15   49.14    1.50
   0   0  16   70.16    2.08
   0  -1  16    0.28    0.36
   0   1 -16   -0.27    0.33
   0   1  16   -0.01    0.34
   1  -2   0   27.27    0.70
  -1  -2   0   26.96    0.70
   1   2   0   25.77    0.69
  -1  -3   0   82.31    1.98
   1   3   0   79.05    1.98
  -1   3   0   78.80    1.98
   1  -3   0   82.68    1.98
   1   3   0   80.13    1.95
  -1   4   0   45.87    1.22
  -1  -4   0   47.06    1.22
  -1   4   0   47.42    1.22
   1   4   0   45.38    1.21
   1  -4   0   46.80    1.22
   1   4   0   47.65    1.22
   1   5   0    1.05    0.17
   1   5   0    0.86    0.17
  -1   5   0    1.00    0.18
  -1   5   0    0.94    0.19
  -1   6   0  107.57    2.40
  -1   6   0  106.78    2.70
   1   6   0  110.87    2.68
  -1   6   0  106.39    2.67
   1   6   0  104.84    2.39
   1   6   0  107.42    2.70
   1   7   0   79.10    1.84
  -1   7   0   78.91    2.08
   1   7   0   80.78    2.07
  -1   7   0   77.60    2.06
  -1   7   0   78.94    1.85
   1   7   0   79.37    2.09
   1   8   0    1.11    0.24
  -1   8   0    1.15    0.24
   1   8   0    1.23    0.24
  -1   8   0    1.13    0.26
  -1   8   0    1.27    0.25
   1   8   0    0.96    0.24
   1   8   0    1.35    0.27
  -1   9   0    7.02    0.48
  -1   9   0    5.83    0.46
   1   9   0    7.67    0.47
   1   9   0    6.96    0.45
   1   9   0    7.27    0.46
  -1   9   0    6.85    0.46
   1   9   0    7.36    0.48
   1  10   0   37.31    1.22
  -1  10   0   37.89    1.10
   1  10   0   37.25    1.20
   1  10   0   38.55    1.10
  -1  10   0   38.20    1.24
   1  10   0   37.44    1.23
  -1  10   0   38.28    1.24
   1  11   0   22.97    0.92
  -1  11   0   24.48    0.86
   1  11   0   24.38    0.85
   1  11   0   26.11    0.98
  -1  11   0   24.74    0.94
   1  11   0   23.39    0.94
  -1  11   0   22.38    0.92
  -1  12   0   11.39    0.59
   1  12   0   10.90    0.62
   1  12   0   12.06    0.69
   1  12   0   12.00    0.68
  -1  12   0   12.73    0.67
   1  12   0   11.53    0.61
  -1  12   0   11.58    0.68
  -1  12   0   11.47    0.67
  -1  13   0    9.41    0.57
  -1  13   0    9.01    0.63
   1  13   0    9.52    0.63
   1  13   0    9.80    0.59
  -1  13   0    9.01    0.59
   1  13   0    8.83    0.62
  -1  13   0    9.71    0.63
   1  13   0    9.80    0.62
  -1  14   0    0.32    0.35
  -1  14   0    0.54    0.34
   1  14   0    0.51    0.32
   1  14   0    0.77    0.33
   1  14   0    0.81    0.38
   1  14   0   -0.08    0.33
  -1  14   0   -0.01    0.35
  -1  14   0    0.47    0.33
  -1   0   1   -0.14    0.03
  -1   0   1   -0.17    0.03
   1   0  -1   -0.17    0.03
   1   0  -1   -0.18    0.04
   1  -1   1  335.38    7.79
  -1  -1  -1  317.17    7.95
   1   1  -1  321.49    7.68
  -1   1   1  330.31    7.70
   1  -1  -1  329.86    8.12
   1  -1  -1  331.73    7.68
   1   1   1  325.25    7.84
  -1  -1   1  326.94    7.82
  -1   1  -1  331.42    7.75
  -1  -1   1  320.92    7.69
   1   1   1  342.85    7.97
  -1  -1   1  333.52    7.67
  -1   1  -1  313.62    7.75
  -1   2   1   10.97    0.35
   1   2  -1   13.18    0.35
  -1  -2  -1   12.85    0.36
   1  -2   1   10.72    0.34
  -1   2   1   10.15    0.36
  -1   2   1   10.36    0.38
   1   2   1   10.73    0.34
   1  -2  -1   12.98    0.36
   1  -2  -1   12.70    0.39
  -1   2  -1   13.17    0.35
  -1  -2   1   10.57    0.35
  -1  -2   1   11.60    0.35
  -1  -2   1   10.92    0.35
  -1   2  -1   12.80    0.37
   1   3  -1   34.11    0.89
   1  -3   1   33.54    0.89
  -1  -3  -1   33.35    0.89
   1   3  -1   34.69    0.89
  -1   3   1   34.04    0.94
   1   3  -1   34.26    0.91
  -1   3   1   33.09    0.89
   1  -3  -1   33.89    0.89
  -1  -3   1   34.59    0.90
   1  -3  -1   35.37    0.91
   1   3   1   33.30    0.90
  -1  -3   1   34.74    0.90
  -1   3  -1   35.48    0.90
   1   3   1   33.54    0.89
  -1   3  -1   33.42    0.89
   1   4  -1  220.76    5.31
   1  -4   1  224.43    5.30
  -1   4   1  221.33    5.23
   1   4  -1  223.00    5.20
   1   4  -1  222.16    5.23
  -1   4   1  213.85    5.31
  -1   4  -1  230.87    5.25
  -1   4  -1  220.82    5.30
   1   4   1  215.43    5.23
   1  -4  -1  222.39    5.23
  -1  -4   1  228.89    5.31
  -1   5   1   46.48    1.23
   1   5  -1   44.98    1.24
   1   5  -1   46.34    1.23
  -1   5   1   47.10    1.25
   1   5  -1   45.30    1.21
   1   5   1   46.95    1.24
  -1   5  -1   46.91    1.24
  -1   5  -1   44.66    1.24
   1   6  -1  121.74    3.07
  -1   6   1  124.10    3.03
   1   6  -1  128.24    3.05
   1   6  -1  121.55    3.01
  -1   6   1  120.62    2.74
  -1   6   1  120.13    3.07
   1   6   1  122.75    3.04
  -1   6  -1  128.38    3.05
   1   6   1  123.39    3.08
   1   6   1  119.56    2.74
  -1   6  -1  125.66    3.07
  -1   7   1   37.38    1.13
   1   7  -1   39.68    1.11
   1  -7   1   36.89    1.08
  -1   7   1   37.62    1.01
   1   7  -1   39.58    1.13
  -1   7   1   38.01    1.13
   1   7  -1   39.08    0.99
   1   7  -1   39.78    1.14
  -1   7  -1   38.22    1.13
   1   7   1   36.82    1.11
  -1   7  -1   39.39    1.14
  -1   7  -1   39.42    1.00
   1   7   1   38.33    1.13
   1   7   1   36.01    1.00
   1   8  -1   22.82    0.81
   1   8  -1   22.57    0.78
   1   8  -1   23.06    0.80
  -1   8   1   23.62    0.81
   1   8  -1   22.96    0.72
  -1   8   1   23.01    0.81
  -1   8   1   22.83    0.73
  -1  -8   1   22.75    0.78
   1   8   1   22.32    0.72
  -1   8  -1   22.66    0.81
  -1   8  -1   22.96    0.71
   1   8   1   22.94    0.82
   1   8   1   21.70    0.79
  -1   8  -1   22.08    0.79
   1   9  -1    1.16    0.26
   1   9  -1    0.99    0.26
  -1   9   1    1.20    0.28
  -1   9   1    1.43    0.30
   1   9  -1    1.15    0.29
   1   9  -1    0.85    0.28
  -1   9   1    1.37    0.28
  -1   9  -1    0.83    0.26
   1   9   1    1.24    0.29
   1   9   1    1.78    0.30
  -1   9  -1    0.74    0.28
   1   9   1    1.63    0.28
  -1   9  -1    1.18    0.27
   1  10  -1   33.27    1.12
   1  10  -1   33.10    0.98
   1  10  -1   32.45    1.12
   1  10  -1   31.57    1.08
  -1  10   1   34.35    1.14
  -1  10   1   34.79    1.13
  -1  10   1   34.09    1.01
   1  10   1   33.31    1.14
  -1  10  -1   33.93    1.00
   1  10   1   35.02    1.01
  -1  10  -1   32.20    1.11
  -1  10  -1   31.80    1.10
   1  10   1   32.80    1.12
   1  11  -1    3.01    0.40
   1  11  -1    2.70    0.39
   1  11  -1    2.40    0.37
  -1  11   1    2.31    0.36
  -1  11   1    2.29    0.35
  -1  11   1    2.19    0.38
   1  11  -1    2.62    0.37
  -1  11  -1    3.46    0.39
   1  11   1    2.29    0.40
  -1  11  -1    2.85    0.39
   1  11   1    2.54    0.37
   1  11   1    2.89    0.40
  -1  11  -1    2.36    0.37
   1  11   1    2.78    0.39
  -1  11  -1    2.37    0.39
   1  12  -1   43.73    1.45
   1  12  -1   42.80    1.40
   1  12  -1   44.38    1.28
  -1  12   1   42.67    1.44
  -1  12   1   43.79    1.45
   1  12  -1   43.86    1.43
  -1  12   1   45.02    1.30
  -1  12  -1   42.18    1.43
  -1  12  -1   45.06    1.43
   1  12   1   41.88    1.43
   1  12   1   43.20    1.44
   1  12   1   42.16    1.29
   1  12   1   41.20    1.39
  -1  12  -1   44.09    1.28
  -1  12  -1   44.83    1.45
   1  13  -1    2.31    0.37
   1  13  -1    1.93    0.37
   1  13  -1    2.05    0.37
  -1  13   1    2.92    0.42
  -1  13   1    2.15    0.38
  -1  13   1    2.38    0.39
   1  13  -1    2.27    0.41
  -1  13   1    2.25    0.37
  -1  13  -1    2.00    0.37
   1  13   1    2.42    0.37
  -1  13  -1    1.88    0.37
   1  13   1    2.66    0.40
   1  13   1    2.32    0.37
  -1  13  -1    2.20    0.39
  -1  13  -1    2.06    0.40
   1  13   1    2.09    0.37
   1  14  -1    1.08    0.37
  -1  14   1    1.16    0.36
  -1  14   1    0.80    0.37
   1  14  -1    1.22    0.37
   1  14  -1    0.79    0.34
  -1  14   1    1.32    0.37
   1  14  -1    0.63    0.37
  -1  14   1    0.80    0.35
   1  14   1    1.19    0.38
  -1  14  -1    1.48    0.40
  -1  14  -1    0.92    0.33
   1  14   1    1.04    0.38
  -1  14  -1    0.58    0.33
  -1  14  -1    0.41    0.34
   1  14   1    0.87    0.34
   1  14   1    0.53    0.32
  -1   0   2   -0.46    0.06
  -1   0  -2   -0.50    0.06
  -1   0   2   -0.47    0.06
   1   0  -2   -0.52    0.07
   1   0  -2   -0.37    0.06
  -1   1   2  406.89    9.86
  -1  -1  -2  391.60    9.52
  -1   1   2  399.26    9.66
  -1   1   2  398.63    9.59
   1  -1   2  401.60    9.48
   1   1  -2  395.56    9.38
  -1  -1  -2  404.18    9.79
  -1   1   2  402.64    9.38
   1  -1   2  416.74    9.47
   1   1  -2  388.89    9.57
  -1   1  -2  398.69    9.49
  -1   1  -2  398.15    9.46
   1   1   2  407.83    9.79
  -1  -1   2  405.54    9.59
   1  -1  -2  408.74    9.36
  -1  -1   2  410.33    9.38
   1   1   2  401.55    9.57
  -1  -2  -2  175.39    4.10
   1   2  -2  176.47    4.02
  -1  -2  -2  171.69    4.05
   1  -2   2  169.41    4.09
  -1   2   2  173.93    4.23
   1  -2   2  177.59    4.05
  -1   2   2  170.16    4.11
   1   2  -2  169.43    4.04
  -1  -2  -2  175.72    4.20
  -1   2   2  170.61    4.03
   1   2  -2  174.42    4.10
   1   2   2  172.13    4.20
   1  -2  -2  168.47    4.23
  -1  -2   2  174.27    4.10
   1   2   2  169.68    4.10
  -1   2  -2  173.05    4.09
  -1  -2   2  173.50    4.02
   1  -2  -2  176.43    4.04
  -1   2  -2  171.93    4.05
  -1  -2   2  172.45    4.04
   1   3  -2  100.40    2.45
  -1   3   2  100.85    2.53
  -1   3   2  100.12    2.41
  -1  -3  -2  100.92    2.42
   1   3  -2  100.70    2.40
   1   3  -2  100.98    2.42
   1  -3   2  100.09    2.44
   1  -3   2  101.77    2.42
   1   3   2   99.96    2.45
  -1  -3   2  101.61    2.45
   1  -3  -2  104.01    2.41
  -1   3  -2  102.91    2.43
  -1   3  -2   99.62    2.44
   1  -3  -2  100.42    2.53
   1   3   2  100.77    2.42
  -1  -3   2   99.32    2.41
   1   3   2   99.91    2.50
  -1   4   2   24.46    0.74
  -1   4   2   26.30    0.72
   1  -4   2   26.08    0.71
   1   4  -2   24.76    0.72
   1   4  -2   23.66    0.72
   1   4  -2   24.62    0.71
  -1  -4   2   26.21    0.73
   1   4   2   25.58    0.73
   1   4   2   26.38    0.72
  -1   4  -2   23.82    0.73
  -1   4  -2   24.03    0.71
   1   4   2   26.90    0.73
   1  -4  -2   24.65    0.75
   1  -4  -2   24.67    0.71
   1   5  -2   12.38    0.45
   1   5  -2   11.36    0.45
   1   5  -2   12.40    0.45
  -1   5   2   11.69    0.45
   1  -5   2   11.18    0.44
  -1   5   2   10.18    0.45
  -1   5  -2   12.31    0.48
  -1   5  -2   12.70    0.45
   1   5   2   11.55    0.46
   1   5   2   11.06    0.46
  -1   6   2   33.28    0.90
   1   6  -2   35.10    0.98
   1   6  -2   35.00    1.00
  -1   6   2   34.81    1.02
   1   6  -2   34.07    1.00
  -1   6   2   34.34    1.00
  -1   6  -2   34.04    1.00
  -1   6  -2   33.55    1.00
   1   6   2   33.75    0.90
   1   6   2   33.43    1.00
   1   6   2   35.93    1.01
  -1   7   2  105.10    2.44
   1   7  -2  108.77    2.41
   1   7  -2  104.78    2.72
   1  -7   2  107.88    2.62
   1   7  -2  107.16    2.70
   1   7  -2  104.51    2.67
  -1   7   2  105.62    2.69
  -1   7   2  111.17    2.75
  -1   7  -2  106.53    2.70
   1   7   2  107.60    2.74
   1   7   2  106.77    2.70
   1   7   2  105.54    2.44
  -1   7  -2  107.06    2.41
  -1  -7   2  105.26    2.59
  -1   7  -2  108.91    2.72
   1   8  -2    7.31    0.47
  -1   8   2    7.69    0.49
   1  -8   2    8.28    0.50
  -1   8   2    7.12    0.46
   1   8  -2    7.73    0.41
  -1   8   2    8.14    0.44
   1   8  -2    7.90    0.44
   1   8  -2    8.68    0.48
   1   8   2    7.90    0.46
   1   8   2    8.00    0.48
  -1  -8   2    8.16    0.48
  -1   8  -2    7.60    0.43
  -1   8  -2    7.88    0.47
  -1   8  -2    7.79    0.46
   1   8   2    7.74    0.44
   1   9  -2    6.92    0.43
   1   9  -2    7.03    0.52
  -1   9   2    6.17    0.46
   1   9  -2    7.90    0.50
  -1   9   2    6.56    0.46
  -1   9   2    5.69    0.44
   1   9  -2    7.91    0.49
   1  -9   2    7.50    0.57
  -1   9  -2    6.60    0.46
  -1   9  -2    6.47    0.52
  -1   9  -2    6.42    0.47
  -1   9  -2    6.86    0.44
   1   9   2    6.60    0.50
   1   9   2    7.12    0.49
   1   9   2    7.13    0.46
  -1  -9   2    6.24    0.54
   1  10  -2   37.54    1.22
   1  10  -2   39.06    1.08
   1  10  -2   40.20    1.24
  -1  10   2   36.76    1.12
  -1  10   2   37.00    1.21
  -1  10   2   37.21    1.24
   1  10  -2   37.35    1.20
   1  10   2   37.75    1.22
  -1  10  -2   37.73    1.19
  -1  10  -2   38.53    1.24
   1  10   2   37.54    1.24
   1  10   2   35.50    1.10
  -1  10  -2   36.35    1.06
  -1  10  -2   38.40    1.23
   1  11  -2   12.71    0.67
  -1  11   2   12.38    0.62
  -1  11   2   11.81    0.68
  -1  11   2   12.27    0.68
   1  11  -2   11.20    0.64
   1  11  -2   12.12    0.57
   1  11  -2   12.66    0.68
   1  11   2   12.83    0.67
  -1  11  -2   12.20    0.69
  -1  11  -2   11.20    0.59
  -1  11  -2   13.48    0.68
  -1  11  -2   14.18    0.70
   1  11   2   12.92    0.64
   1  11   2   12.49    0.68
   1  11   2   12.75    0.68
  -1  12   2   16.15    0.81
   1  12  -2   17.58    0.80
   1  12  -2   16.61    0.71
  -1  12   2   16.95    0.74
  -1  12   2   16.42    0.81
   1  12  -2   16.97    0.81
   1  12  -2   16.23    0.82
  -1  12  -2   18.07    0.73
   1  12   2   17.51    0.79
  -1  12  -2   17.88    0.82
  -1  12  -2   17.44    0.80
   1  12   2   15.26    0.77
   1  12   2   16.81    0.82
  -1  12  -2   16.97    0.82
   1  12   2   17.78    0.76
   1  13  -2   31.76    1.21
  -1  13   2   30.88    1.21
   1  13  -2   31.35    1.05
  -1  13   2   31.14    1.18
   1  13  -2   32.31    1.23
   1  13  -2   33.60    1.20
  -1  13   2   32.60    1.09
  -1  13   2   31.82    1.22
   1  13   2   33.25    1.23
   1  13   2   31.62    1.19
  -1  13  -2   33.44    1.24
   1  13   2   32.95    1.10
  -1  13  -2   30.98    1.18
   1  13   2   31.86    1.20
  -1  13  -2   32.38    1.07
  -1  13  -2   31.20    1.16
  -1  14   2   -0.05    0.35
   1  14  -2    0.62    0.35
  -1  14   2   -0.05    0.33
  -1  14   2    0.21    0.36
   1  14  -2    0.36    0.33
   1  14  -2    0.34    0.31
  -1  14   2    0.39    0.34
   1  14  -2    0.25    0.37
   1  14   2    0.43    0.36
   1  14   2    0.34    0.35
  -1  14  -2    0.19    0.34
  -1  14  -2    0.46    0.34
   1  14   2   -0.05    0.31
  -1   0   3   -0.24    0.08
  -1   0   3   -0.04    0.11
   1   0   3    0.11    0.05
   1   0   3   -0.06    0.04
   1   0  -3   -0.15    0.13
   1   0  -3   -0.04    0.09
  -1   0  -3    0.01    0.10
  -1   0   3   -0.03    0.09
  -1   1   3   67.83    1.68
   1   1  -3   69.62    1.76
  -1  -1  -3   68.14    1.71
  -1  -1  -3   68.63    1.65
   1   1  -3   70.34    1.62
   1  -1   3   68.72    1.63
  -1   1   3   68.04    1.68
  -1   1   3   69.06    1.74
   1   1  -3   68.20    1.67
   1  -1  -3   70.81    1.62
  -1  -1   3   69.56    1.67
   1  -1  -3   69.54    1.68
   1   1   3   67.93    1.71
  -1   1  -3   68.85    1.63
  -1   1  -3   69.48    1.65
  -1  -1   3   68.98    1.62
   1  -1  -3   66.96    1.74
   1   1   3   68.55    1.65
   1  -2   3  145.79    3.39
   1  -2   3  148.42    3.41
  -1  -2  -3  139.77    3.51
   1   2  -3  140.10    3.43
  -1   2   3  143.84    3.37
  -1  -2  -3  146.29    3.38
  -1   2   3  144.84    3.54
   1   2  -3  141.93    3.37
  -1  -2  -3  140.91    3.42
  -1   2   3  144.63    3.45
  -1   2  -3  144.58    3.39
  -1  -2   3  146.12    3.37
   1  -2  -3  141.49    3.44
   1  -2  -3  143.31    3.37
  -1   2  -3  140.16    3.41
   1   2   3  144.01    3.43
  -1  -2   3  147.74    3.43
  -1   2  -3  142.02    3.34
  -1  -2   3  148.05    3.36
   1  -2  -3  142.30    3.55
   1   2   3  145.61    3.51
   1   3  -3   14.13    0.44
  -1  -3  -3   14.00    0.44
   1  -3   3   14.28    0.45
  -1  -3  -3   14.07    0.45
  -1   3   3   13.87    0.43
   1   3  -3   13.72    0.43
  -1  -3  -3   14.20    0.45
  -1   3   3   13.48    0.45
   1  -3   3   13.57    0.42
   1   3  -3   14.15    0.44
  -1   3   3   14.35    0.48
   1   3   3   13.90    0.43
  -1  -3   3   14.10    0.43
  -1  -3   3   14.03    0.43
  -1   3  -3   14.40    0.41
  -1   3  -3   14.32    0.42
  -1   3  -3   13.73    0.45
  -1  -3   3   13.97    0.44
   1   3   3   13.47    0.44
   1  -3  -3   13.81    0.47
   1  -3  -3   14.15    0.43
  -1  -4  -3   40.42    1.07
  -1   4   3   38.24    1.07
   1   4  -3   40.37    1.04
  -1   4   3   38.10    1.04
   1   4  -3   40.52    1.05
   1   4  -3   40.51    1.06
   1  -4   3   39.26    1.05
  -1   4  -3   40.08    1.05
   1  -4  -3   39.77    1.10
   1  -4  -3   39.26    1.04
  -1   4  -3   40.38    1.03
  -1   4  -3   40.41    1.06
  -1  -4   3   39.23    1.06
   1   4   3   38.24    1.06
   1   4   3   37.73    1.06
   1   5  -3   29.61    0.84
   1  -5   3   30.81    0.86
  -1   5   3   30.52    0.79
   1   5  -3   29.26    0.86
   1   5  -3   29.02    0.86
  -1   5   3   30.73    0.89
  -1   5   3   29.59    0.85
  -1   5  -3   28.73    0.83
   1   5   3   29.28    0.79
  -1   5  -3   28.82    0.85
  -1   5  -3   29.82    0.88
   1  -5  -3   28.40    0.90
   1   5   3   29.07    0.85
   1   5   3   31.58    0.88
  -1  -5   3   31.64    0.87
   1   6  -3   57.37    1.60
  -1   6   3   59.91    1.45
  -1   6   3   60.22    1.62
   1   6  -3   61.62    1.60
   1   6  -3   59.59    1.58
  -1   6   3   61.10    1.59
   1  -6   3   61.31    1.56
  -1   6  -3   60.58    1.60
   1   6   3   63.22    1.63
   1   6   3   60.33    1.45
   1   6   3   61.29    1.60
  -1   6  -3   58.88    1.59
  -1   6  -3   59.12    1.56
  -1   7   3   31.44    1.00
   1   7  -3   31.80    0.98
   1   7  -3   33.68    1.00
   1  -7   3   32.31    0.98
   1   7  -3   33.41    0.97
  -1   7   3   30.41    0.96
   1   7  -3   32.42    0.84
  -1   7   3   30.36    0.89
  -1   7  -3   31.34    0.95
  -1   7  -3   31.75    0.97
  -1  -7   3   30.96    0.94
   1   7   3   31.47    0.98
  -1   7  -3   31.75    0.85
  -1   7  -3   32.93    0.99
   1   7   3   30.99    0.89
   1   7   3   30.51    0.98
   1   8  -3   44.98    1.29
  -1   8   3   44.71    1.21
   1   8  -3   43.33    1.14
  -1   8   3   46.13    1.34
   1  -8   3   44.57    1.30
   1   8  -3   44.06    1.31
  -1   8   3   46.33    1.32
   1   8  -3   44.70    1.33
  -1   8  -3   44.70    1.31
  -1   8  -3   45.20    1.34
   1   8   3   43.29    1.32
  -1   8  -3   44.77    1.28
  -1   8  -3   44.81    1.16
   1   8   3   45.08    1.20
   1   8   3   43.38    1.30
  -1  -8   3   46.00    1.27
   1   9  -3    5.57    0.41
   1   9  -3    5.29    0.42
  -1   9   3    3.93    0.40
   1  -9   3    4.53    0.45
   1   9  -3    5.00    0.43
  -1   9   3    4.08    0.39
   1   9  -3    4.73    0.36
  -1   9   3    4.48    0.39
  -1   9  -3    4.79    0.39
  -1  -9   3    4.98    0.42
   1   9   3    4.21    0.40
   1   9   3    4.86    0.40
   1   9   3    4.58    0.41
  -1   9  -3    4.99    0.44
  -1   9  -3    4.32    0.39
  -1   9  -3    4.23    0.41
  -1  10   3   57.13    1.70
   1  10  -3   57.79    1.71
  -1  10   3   60.07    1.56
   1  10  -3   59.96    1.69
   1  10  -3   60.44    1.73
   1  10  -3   58.77    1.50
  -1  10   3   58.65    1.74
   1  10   3   57.47    1.56
   1  10   3   57.35    1.74
  -1  10  -3   60.92    1.72
  -1  10  -3   59.76    1.50
  -1 -10   3   59.03    1.63
  -1  10  -3   57.20    1.72
   1  10   3   57.18    1.71
  -1  10  -3   60.08    1.68
  -1  11   3    1.11    0.34
   1  11  -3    1.32    0.29
  -1  11   3    1.18    0.32
   1  11  -3    1.59    0.35
   1  11  -3    1.94    0.35
   1 -11   3    1.55    0.38
  -1  11   3    1.52    0.33
   1  11  -3    1.12    0.33
  -1  11  -3    1.77    0.34
  -1  11  -3    0.94    0.30
  -1  11  -3    1.73    0.35
  -1 -11   3    1.05    0.38
  -1  11  -3    1.15    0.33
   1  11   3    0.87    0.32
   1  11   3    1.05    0.31
   1  11   3    1.16    0.33
   1  11   3    1.43    0.33
   1  12  -3   64.86    1.72
   1  12  -3   66.14    1.97
  -1  12   3   62.68    1.94
   1  12  -3   67.45    1.99
  -1  12   3   63.94    1.97
   1  12  -3   68.46    1.95
  -1  12   3   65.67    1.79
  -1  12  -3   66.84    1.97
  -1  12  -3   68.18    1.73
  -1  12  -3   67.34    1.93
   1  12   3   65.77    1.99
   1  12   3   64.63    1.78
  -1  12  -3   65.17    1.97
   1  12   3   66.94    1.95
   1  13  -3    5.15    0.52
   1  13  -3    6.44    0.56
  -1  13   3    5.77    0.51
  -1  13   3    5.84    0.55
  -1  13   3    6.52    0.58
   1  13  -3    5.35    0.51
   1  13  -3    6.53    0.50
   1  13   3    4.95    0.51
  -1  13  -3    4.85    0.51
   1  13   3    4.78    0.50
  -1  13  -3    6.44    0.51
   1  13   3    6.86    0.54
  -1  14   3   -0.05    0.33
  -1  14   3   -0.10    0.31
  -1  14   3   -0.11    0.32
   1  14  -3    0.04    0.30
  -1  14   3   -0.50    0.32
   1  14  -3    0.10    0.33
   1  14   3   -0.15    0.33
  -1  14  -3    0.10    0.32
   1  14   3   -0.41    0.32
  -1  14  -3    0.03    0.35
   1  14   3    0.56    0.32
  -1   0   4   -0.03    0.08
   1   0  -4    0.04    0.13
  -1   0  -4    0.03    0.10
   1   0   4    0.05    0.05
   1   0  -4    0.01    0.08
  -1   0   4   -0.04    0.08
  -1   0   4   -0.05    0.10
   1   0   4    0.01    0.05
  -1  -1  -4  674.64   16.91
   1   1  -4  678.72   17.04
  -1   1   4  719.05   16.91
   1   1  -4  670.98   16.36
   1  -1   4  721.64   15.97
   1  -1   4  715.22   16.30
  -1  -1  -4  684.90   16.34
   1   1  -4  697.69   16.06
  -1   1   4  705.56   16.53
  -1   1   4  690.97   16.46
  -1  -1   4  693.23   16.42
   1  -1  -4  696.70   16.02
   1   1   4  700.30   16.40
  -1  -1   4  714.14   16.07
   1  -1  -4  675.78   17.03
   1   1   4  696.42   16.92
  -1   1  -4  684.70   16.21
   1  -1  -4  668.33   16.46
  -1   1  -4  664.39   16.27
   1   2  -4  117.94    2.75
  -1   2   4  113.96    2.82
  -1   2   4  113.09    2.82
  -1  -2  -4  118.94    2.80
   1   2  -4  117.77    2.94
   1  -2   4  115.87    2.77
  -1   2   4  115.36    2.91
   1   2  -4  122.51    2.81
  -1  -2  -4  114.73    2.88
   1  -2   4  115.58    2.78
  -1  -2   4  114.56    2.75
   1   2   4  115.83    2.80
  -1  -2   4  114.68    2.75
  -1  -2   4  115.46    2.80
  -1   2  -4  119.67    2.72
   1   2   4  114.55    2.88
  -1   2  -4  119.63    2.78
   1  -2  -4  116.47    2.82
  -1   2  -4  115.21    2.77
   1  -2  -4  118.63    2.92
   1  -2  -4  120.85    2.75
   1   3  -4   17.52    0.55
  -1   3   4   19.16    0.53
   1   3  -4   17.30    0.55
  -1   3   4   18.88    0.57
  -1  -3  -4   17.54    0.57
   1  -3   4   19.80    0.56
   1  -3   4   19.68    0.54
  -1  -3  -4   18.69    0.55
   1   3   4   19.80    0.57
  -1   3  -4   17.51    0.56
  -1   3  -4   18.26    0.52
  -1  -3   4   19.91    0.55
  -1  -3   4   19.76    0.56
   1  -3  -4   18.07    0.54
   1   3   4   19.14    0.56
   1  -3  -4   18.12    0.61
  -1  -3   4   19.28    0.55
  -1   3  -4   18.84    0.53
   1   4  -4   47.13    1.27
  -1   4   4   51.01    1.32
   1   4  -4   47.39    1.28
  -1  -4  -4   48.44    1.31
  -1   4   4   51.38    1.27
   1  -4   4   52.46    1.28
   1   4  -4   48.39    1.26
   1   4   4   49.11    1.30
  -1  -4   4   52.80    1.30
   1   4   4   52.44    1.31
  -1   4  -4   47.91    1.29
  -1   4  -4   47.74    1.24
  -1   4  -4   47.82    1.27
   1  -4  -4   47.94    1.26
   1  -4  -4   47.58    1.34
   1   5  -4   87.15    2.20
  -1   5   4   83.67    1.98
   1  -5   4   88.57    2.18
   1   5  -4   88.33    2.18
   1  -5   4   86.17    2.15
   1   5  -4   87.78    2.16
  -1  -5  -4   88.03    2.24
  -1   5   4   86.42    2.16
  -1   5   4   86.94    2.22
   1  -5  -4   87.57    2.27
   1   5   4   85.63    2.21
  -1  -5   4   90.95    2.20
   1   5   4   83.69    1.98
  -1   5  -4   87.56    2.19
  -1   5  -4   86.69    2.18
  -1   5  -4   86.89    2.14
   1   6  -4   43.29    1.21
   1  -6   4   44.19    1.19
   1   6  -4   40.71    1.20
  -1   6   4   43.09    1.10
   1  -6   4   43.61    1.20
  -1   6   4   44.05    1.19
   1   6  -4   42.05    1.18
  -1   6   4   42.27    1.22
  -1   6  -4   41.53    1.16
   1   6   4   43.41    1.21
  -1   6  -4   43.89    1.22
   1  -6  -4   41.86    1.24
  -1   6  -4   42.00    1.19
   1   6   4   41.06    1.09
  -1  -6   4   43.42    1.18
  -1   7   4   74.80    1.98
   1   7  -4   74.82    1.95
   1   7  -4   71.72    1.94
   1  -7   4   73.28    1.91
  -1   7   4   73.35    1.77
   1   7  -4   74.98    1.92
  -1   7   4   73.94    1.93
  -1   7  -4   73.64    1.94
  -1   7  -4   71.24    1.93
  -1   7  -4   70.41    1.70
  -1  -7   4   74.68    1.89
   1   7   4   74.16    1.97
  -1   7  -4   72.78    1.90
   1   7   4   73.02    1.76
  -1   8   4    1.65    0.28
   1   8  -4    2.19    0.25
   1   8  -4    1.64    0.29
   1   8  -4    1.87    0.28
  -1   8   4    1.81    0.30
   1  -8   4    1.71    0.34
  -1   8   4    1.28    0.29
   1   8  -4    1.82    0.32
  -1   8  -4    2.01    0.33
  -1   8  -4    1.92    0.27
   1   8   4    2.38    0.32
   1   8   4    1.97    0.30
  -1   8  -4    2.18    0.29
  -1  -8   4    1.99    0.34
  -1   8  -4    2.15    0.28
   1   8   4    1.20    0.28
   1  -9   4   19.32    0.77
   1   9  -4   21.21    0.77
  -1   9   4   19.04    0.72
   1   9  -4   20.11    0.80
   1   9  -4   21.01    0.79
   1   9  -4   20.28    0.66
  -1   9   4   19.41    0.79
  -1   9   4   18.41    0.75
  -1   9  -4   21.19    0.75
  -1  -9   4   20.57    0.78
   1   9   4   17.73    0.75
   1   9   4   19.28    0.72
  -1   9  -4   20.82    0.76
   1   9   4   17.31    0.74
  -1   9  -4   19.60    0.66
  -1   9  -4   20.98    0.82
   1  10  -4   38.16    1.25
   1  10  -4   39.53    1.08
  -1  10   4   37.88    1.27
   1 -10   4   38.28    1.23
  -1  10   4   36.58    1.13
   1  10  -4   38.44    1.23
  -1  10   4   36.34    1.22
   1  10  -4   40.35    1.22
  -1  10  -4   37.00    1.24
  -1  10  -4   39.22    1.20
   1  10   4   38.12    1.14
  -1  10  -4   39.07    1.07
  -1  10  -4   39.95    1.24
   1  10   4   38.44    1.25
  -1 -10   4   37.37    1.19
   1  11  -4   10.30    0.61
  -1  11   4   10.54    0.59
   1  11  -4   10.93    0.62
   1 -11   4   11.17    0.69
  -1  11   4   10.93    0.62
   1  11  -4   11.11    0.64
   1  11  -4   10.86    0.53
  -1  11   4   11.03    0.63
  -1  11  -4   10.27    0.60
  -1  11  -4   11.36    0.67
  -1 -11   4   10.77    0.67
  -1  11  -4   11.51    0.64
   1  11   4   11.78    0.65
   1  11   4   11.09    0.60
  -1  11  -4   11.05    0.54
  -1  12   4   16.46    0.82
  -1  12   4   18.00    0.79
   1  12  -4   18.14    0.83
   1  12  -4   16.49    0.80
  -1  12   4   16.57    0.80
   1  12  -4   17.26    0.80
   1 -12   4   17.79    0.83
   1  12  -4   18.83    0.70
   1  12   4   16.88    0.78
  -1  12  -4   18.05    0.70
   1  12   4   17.10    0.80
  -1  12  -4   16.93    0.83
   1  12   4   17.02    0.78
  -1  13   4   25.03    0.97
   1  13  -4   25.47    1.05
   1  13  -4   23.93    0.87
  -1  13   4   23.71    1.01
  -1  13   4   26.80    1.09
   1  13   4   26.32    1.04
  -1  13  -4   25.54    0.90
   1  13   4   26.21    0.99
   1  13   4   24.64    1.04
  -1  13  -4   25.52    1.07
  -1   0   5    0.21    0.09
   1   0  -5   -0.10    0.09
   1   0   5    0.00    0.06
  -1   0   5   -0.03    0.09
  -1   0  -5   -0.13    0.11
   1   0  -5    0.07    0.13
   1   0   5   -0.02    0.06
   1   1  -5  161.46    3.91
  -1  -1  -5  160.39    3.88
   1   1  -5  160.88    4.08
  -1  -1  -5  159.97    4.04
   1  -1   5  172.45    3.87
  -1   1   5  165.13    3.92
   1  -1   5  166.24    3.87
   1  -1   5  164.12    3.79
   1   1  -5  167.58    3.82
  -1   1   5  165.31    3.92
   1   1   5  167.27    4.04
   1   1   5  162.57    3.89
  -1  -1   5  163.91    3.90
  -1   1  -5  165.62    3.87
   1  -1  -5  165.28    3.81
   1   1   5  164.67    3.89
  -1   1  -5  159.26    3.85
   1  -1  -5  165.00    4.07
  -1   1  -5  162.22    4.06
   1  -1  -5  166.74    3.92
   1   2  -5  154.68    3.60
  -1   2   5  151.96    3.69
  -1  -2  -5  152.82    3.66
   1  -2   5  153.71    3.62
   1  -2   5  156.01    3.64
  -1  -2  -5  154.61    3.78
   1   2  -5  150.15    3.67
  -1   2   5  152.79    3.69
  -1   2  -5  152.11    3.62
  -1  -2   5  157.20    3.67
  -1   2  -5  151.10    3.63
   1   2   5  155.22    3.78
  -1  -2   5  154.15    3.59
   1  -2  -5  152.70    3.59
   1  -2  -5  154.09    3.82
   1   2   5  154.81    3.67
  -1  -2   5  151.62    3.60
   1   3  -5    1.02    0.15
  -1   3   5    1.17    0.16
   1   3  -5    0.55    0.13
   1  -3   5    1.01    0.12
  -1  -3  -5    0.90    0.15
  -1  -3  -5    0.66    0.16
   1   3   5    0.88    0.14
  -1  -3   5    1.20    0.14
   1  -3  -5    0.59    0.19
  -1  -3   5    0.93    0.13
  -1  -3   5    1.07    0.14
  -1   3  -5    0.88    0.12
  -1   3  -5    0.92    0.12
   1   3   5    0.91    0.15
  -1   3  -5    0.79    0.16
   1  -3  -5    0.81    0.13
  -1  -4  -5  213.89    5.29
   1  -4   5  221.35    5.04
  -1   4   5  215.04    5.07
   1   4  -5  214.97    5.09
   1   4  -5  215.27    5.16
   1  -4   5  222.17    5.14
  -1   4   5  209.60    5.18
  -1  -4   5  217.08    5.04
  -1   4  -5  215.16    5.03
  -1  -4   5  218.90    5.16
   1  -4  -5  209.78    5.33
  -1   4  -5  209.26    5.10
  -1   4  -5  213.41    5.14
   1   4   5  217.17    5.17
   1  -4  -5  216.60    5.07
  -1   5   5   49.11    1.38
   1   5  -5   50.12    1.33
  -1   5   5   50.70    1.33
   1  -5   5   53.12    1.34
   1  -5   5   51.58    1.36
  -1  -5  -5   48.50    1.37
   1   5  -5   50.68    1.35
  -1   5   5   51.00    1.24
   1   5  -5   50.98    1.35
   1  -5  -5   49.87    1.41
  -1  -5   5   51.37    1.35
  -1   5  -5   49.44    1.35
  -1  -5   5   52.78    1.35
  -1   5  -5   49.71    1.30
   1   5   5   48.48    1.24
  -1   5  -5   50.93    1.33
   1   5   5   49.47    1.37
   1  -6   5  200.10    4.73
  -1   6   5  189.21    4.67
  -1   6   5  196.78    4.78
   1   6  -5  194.67    4.65
   1   6  -5  195.48    4.75
   1   6  -5  202.54    4.70
  -1   6   5  188.57    4.27
   1  -6   5  194.37    4.62
  -1  -6  -5  199.45    4.86
  -1  -6   5  204.44    4.75
  -1   6  -5  196.80    4.70
  -1   6  -5  194.06    4.63
   1  -6  -5  202.30    4.90
   1   6   5  184.62    4.76
   1   6   5  187.96    4.27
  -1  -6   5  187.77    4.60
  -1   6  -5  193.12    4.73
   1   7  -5   12.82    0.58
   1  -7   5   13.21    0.61
  -1   7   5   11.56    0.53
   1   7  -5   12.55    0.54
  -1   7   5   12.60    0.57
   1   7  -5   13.45    0.55
  -1   7   5   11.95    0.54
  -1   7  -5   12.52    0.52
  -1   7  -5   12.27    0.53
  -1   7  -5   13.28    0.57
  -1   7  -5   12.83    0.46
   1   7   5   12.19    0.52
  -1  -7   5   11.97    0.56
   1   7   5   12.27    0.56
   1  -7  -5   12.44    0.60
  -1   8   5    4.97    0.38
   1   8  -5    4.34    0.37
   1   8  -5    4.52    0.39
   1   8  -5    4.47    0.31
  -1   8   5    4.20    0.39
   1  -8   5    4.09    0.43
  -1   8   5    3.87    0.36
   1   8  -5    4.49    0.40
  -1   8  -5    4.10    0.37
   1   8   5    3.67    0.35
  -1  -8   5    4.07    0.40
  -1   8  -5    5.37    0.45
  -1   8  -5    4.17    0.31
  -1   8  -5    4.15    0.37
   1   8   5    3.50    0.36
   1  -9   5    7.46    0.56
  -1   9   5    8.64    0.49
  -1   9   5    7.99    0.50
   1   9  -5    9.24    0.51
   1   9  -5    9.32    0.52
  -1   9   5    7.42    0.48
   1   9  -5    8.93    0.51
   1   9  -5    9.47    0.41
  -1   9  -5    8.79    0.43
   1   9   5    7.72    0.50
  -1   9  -5    9.21    0.50
  -1   9  -5    9.04    0.55
  -1  -9   5    7.58    0.53
   1   9   5    7.24    0.47
  -1   9  -5    9.98    0.50
   1 -10   5   17.40    0.80
   1  10  -5   18.38    0.64
   1  10  -5   17.95    0.76
  -1  10   5   18.14    0.75
   1  10  -5   17.99    0.76
  -1  10   5   18.58    0.74
  -1  10   5   17.99    0.79
   1  10  -5   18.22    0.77
   1  10   5   18.86    0.80
  -1  10  -5   17.62    0.79
  -1  10  -5   18.93    0.66
   1  10   5   19.38    0.74
  -1  10  -5   17.71    0.74
  -1  10  -5   17.83    0.76
  -1 -10   5   20.34    0.79
   1  11  -5    1.57    0.28
   1  11  -5    1.96    0.36
  -1  11   5    1.40    0.34
   1  11  -5    2.42    0.38
  -1  11   5    2.05    0.35
   1  11  -5    1.56    0.33
  -1  11   5    1.66    0.34
   1 -11   5    1.48    0.40
  -1  11  -5    1.50    0.36
   1  11   5    1.73    0.35
  -1 -11   5    2.33    0.40
  -1  11  -5    2.19    0.30
   1  11   5    1.74    0.33
  -1  12   5   26.33    1.02
  -1  12   5   27.44    0.98
   1  12  -5   26.45    1.06
   1 -12   5   28.03    1.06
   1  12  -5   26.18    0.86
  -1  12   5   26.72    1.06
   1  12   5   28.52    1.08
   1  12   5   27.27    0.98
  -1 -12   5   26.24    1.00
   1  12   5   27.40    1.05
  -1  12  -5   25.72    1.04
  -1  12  -5   26.00    0.87
   1  13  -5    2.61    0.34
   1  13  -5    3.82    0.48
  -1  13   5    2.28    0.42
   1 -13   5    1.51    0.45
  -1  13   5    2.07    0.39
  -1 -13   5    2.08    0.44
   1  13   5    1.81    0.39
  -1  13  -5    2.45    0.35
  -1  13  -5    2.81    0.44
   1  13   5    2.01    0.38
   1  13   5    2.06    0.37
   1   0   6    0.17    0.07
  -1   0   6   -0.11    0.09
  -1   0   6    0.07    0.10
   1   0  -6    0.19    0.10
   1   0   6   -0.05    0.06
  -1   0  -6    0.08    0.14
   1   0  -6   -0.08    0.16
   1  -1   6  348.11    7.92
  -1  -1  -6  338.12    7.94
  -1   1   6  341.58    7.97
   1  -1   6  350.52    7.76
   1  -1   6  352.46    7.92
   1   1  -6  321.49    7.96
   1   1  -6  330.78    8.26
  -1   1   6  338.60    7.98
   1   1  -6  331.01    7.80
  -1  -1  -6  333.79    8.22
   1   1   6  341.94    7.94
   1  -1  -6  330.07    8.24
  -1   1  -6  323.90    8.24
   1   1   6  343.42    7.94
  -1  -1   6  344.71    8.02
  -1   1  -6  342.25    7.92
   1  -1  -6  338.53    7.79
  -1  -1   6  338.72    7.96
  -1   1  -6  328.33    7.84
   1   2  -6   27.09    0.83
  -1  -2  -6   27.41    0.78
   1   2  -6   25.94    0.72
  -1   2   6   25.31    0.74
   1   2  -6   26.47    0.69
  -1   2   6   25.92    0.74
   1  -2   6   26.54    0.68
   1  -2  -6   26.18    0.81
   1   2   6   25.13    0.71
   1  -2  -6   26.83    0.68
  -1  -2   6   25.98    0.72
  -1   2  -6   27.19    0.72
  -1   2  -6   26.97    0.68
   1   2   6   26.09    0.72
  -1  -2   6   25.39    0.70
  -1   2  -6   26.47    0.82
  -1  -2   6   25.51    0.68
  -1   3   6   26.41    0.78
   1  -3   6   26.15    0.73
   1   3  -6   26.94    0.76
  -1  -3  -6   28.71    0.76
  -1   3   6   26.97    0.79
   1   3  -6   26.91    0.75
  -1  -3  -6   27.41    0.81
   1   3  -6   27.80    0.88
  -1  -3   6   27.06    0.74
  -1   3  -6   27.37    0.73
  -1  -3   6   26.77    0.76
  -1   3  -6   27.40    0.77
   1  -3  -6   26.73    0.84
   1  -3  -6   28.50    0.74
  -1  -3   6   27.23    0.82
   1   3   6   27.17    0.77
  -1  -3   6   26.69    0.74
   1   4  -6   43.70    1.19
   1  -4   6   44.93    1.23
   1  -4   6   46.53    1.17
  -1  -4  -6   43.05    1.23
  -1   4   6   44.36    1.23
   1   4  -6   43.49    1.17
  -1   4  -6   43.78    1.20
  -1  -4   6   45.06    1.23
  -1  -4   6   47.23    1.20
   1   4   6   44.85    1.21
  -1  -4   6   47.06    1.17
   1   4   6   44.92    1.10
   1  -4  -6   44.95    1.27
  -1   4  -6   43.28    1.14
  -1   4  -6   43.37    1.16
   1  -4  -6   44.03    1.17
   1  -5   6   24.36    0.73
  -1   5   6   23.02    0.70
  -1  -5  -6   24.76    0.78
  -1   5   6   23.25    0.78
   1   5  -6   24.56    0.75
   1   5  -6   24.49    0.75
   1  -5   6   24.10    0.82
  -1   5  -6   24.22    0.77
   1   5   6   23.75    0.70
  -1  -5   6   24.19    0.80
  -1   5  -6   24.70    0.72
  -1  -5   6   24.88    0.75
   1  -5  -6   24.48    0.81
   1   5   6   22.66    0.76
  -1   5  -6   24.06    0.73
  -1   6   6   38.45    1.04
   1  -6   6   39.98    1.11
   1   6  -6   40.34    1.11
   1   6  -6   39.21    1.13
  -1   6   6   37.39    1.15
   1   6  -6   39.09    1.14
  -1  -6  -6   39.21    1.16
   1  -6   6   39.36    1.17
   1  -6  -6   39.69    1.20
  -1   6  -6   39.35    1.14
  -1   6  -6   38.54    1.09
  -1   6  -6   40.03    1.12
   1   6   6   38.62    1.15
  -1  -6   6   40.14    1.13
  -1  -6   6   39.42    1.16
   1   6   6   37.14    1.04
   1  -7   6  102.02    2.59
   1   7  -6  101.04    2.59
   1  -7   6  104.12    2.59
   1   7  -6  100.20    2.61
  -1   7   6   99.93    2.65
  -1   7   6  102.47    2.37
   1   7  -6  100.86    2.56
   1   7   6   96.54    2.63
   1  -7  -6  100.66    2.70
   1   7   6  101.07    2.37
  -1  -7   6  100.54    2.57
  -1   7  -6  104.16    2.60
  -1   7  -6  101.82    2.61
  -1   7  -6  104.71    2.55
   1   8  -6    2.03    0.28
   1  -8   6    1.53    0.33
   1   8  -6    1.82    0.23
  -1   8   6    1.97    0.29
  -1   8   6    2.12    0.29
   1   8  -6    1.68    0.28
  -1   8   6    1.97    0.30
   1   8  -6    1.82    0.31
   1   8   6    1.51    0.26
   1   8   6    1.55    0.27
  -1   8  -6    1.99    0.33
  -1   8  -6    1.81    0.23
  -1   8  -6    1.97    0.26
  -1  -8   6    1.74    0.32
  -1   8  -6    1.86    0.27
  -1   9   6   12.30    0.62
  -1   9   6   11.81    0.57
   1   9  -6   13.66    0.61
   1  -9   6   11.05    0.64
  -1   9   6   11.63    0.58
   1   9  -6   12.80    0.47
   1   9  -6   13.28    0.63
   1   9  -6   13.76    0.60
   1   9   6   11.73    0.57
  -1   9  -6   11.66    0.58
  -1   9  -6   13.38    0.59
  -1   9  -6   12.53    0.63
  -1   9  -6   12.48    0.48
   1   9   6   12.77    0.62
  -1  -9   6   11.85    0.63
   1 -10   6   30.71    1.07
  -1  10   6   28.74    0.97
   1  10  -6   28.77    0.84
  -1  10   6   27.75    1.04
   1  10  -6   27.81    1.01
  -1 -10   6   28.15    1.02
   1  10   6   31.15    0.98
   1  10   6   29.14    1.05
  -1  10  -6   28.38    1.04
  -1  10  -6   27.81    0.85
   1 -11   6    6.99    0.58
  -1  11   6    7.26    0.56
   1  11  -6    5.73    0.52
  -1  11   6    8.48    0.57
   1  11   6    8.10    0.57
  -1  11  -6    6.83    0.56
   1  11   6    7.53    0.52
  -1  11  -6    7.41    0.45
  -1 -11   6    7.15    0.58
  -1  12   6   11.88    0.68
   1  12  -6   12.89    0.71
   1 -12   6   12.57    0.75
  -1  12   6   12.80    0.70
   1  12   6   10.49    0.64
  -1 -12   6   12.07    0.71
   1  12   6   13.66    0.71
  -1  12  -6   12.41    0.69
   1  12   6   12.01    0.70
  -1  12  -6   11.83    0.57
  -1  13   6   17.89    0.83
   1  13  -6   17.44    0.88
  -1  13   6   17.87    0.89
   1 -13   6   17.00    0.90
   1  13   6   18.67    0.87
   1  13   6   17.67    0.86
   1  13   6   19.54    0.87
  -1  13  -6   17.78    0.87
  -1 -13   6   17.57    0.86
  -1   0  -7   -0.11    0.15
   1   0   7    0.17    0.17
  -1   0   7    0.12    0.10
   1   0   7    0.14    0.07
   1   0  -7    0.00    0.15
   1   0   7    0.07    0.08
  -1   0  -7    0.22    0.10
  -1   0   7   -0.03    0.18
  -1   0   7    0.08    0.10
   1   0  -7    0.00    0.11
   1   1  -7   59.15    1.66
  -1  -1  -7   63.27    1.63
   1  -1   7   59.59    1.57
   1  -1   7   59.89    1.44
  -1   1   7   60.81    1.56
  -1   1   7   60.12    1.54
   1   1  -7   61.66    1.53
   1  -1   7   61.13    1.48
   1   1  -7   62.89    1.45
  -1   1   7   61.99    1.54
   1  -1   7   61.17    1.48
   1   1   7   61.05    1.50
   1  -1  -7   61.81    1.44
   1  -1  -7   61.57    1.65
   1   1   7   59.92    1.50
  -1  -1   7   61.62    1.53
  -1  -1   7   60.45    1.52
  -1  -1   7   59.94    1.58
  -1   1  -7   61.16    1.50
  -1   1  -7   61.66    1.65
  -1   1  -7   62.36    1.48
  -1   2   7   40.37    1.12
  -1   2   7   40.31    1.10
  -1  -2  -7   40.76    1.14
   1   2  -7   42.51    1.22
  -1   2   7   42.49    1.10
   1  -2   7   41.80    1.03
   1   2  -7   40.12    1.07
   1   2  -7   41.00    1.03
   1  -2   7   41.65    1.15
   1  -2  -7   40.76    1.02
   1  -2  -7   40.50    1.18
  -1  -2   7   42.37    1.07
  -1   2  -7   40.53    1.03
   1   2   7   41.24    1.07
  -1   2  -7   42.34    1.07
  -1   2  -7   40.16    1.19
  -1  -2   7   41.81    1.05
   1   2   7   41.91    1.07
   1   3  -7    0.22    0.13
  -1  -3  -7    0.12    0.17
  -1   3   7    0.36    0.19
  -1  -3  -7    0.25    0.14
   1   3  -7    0.35    0.13
  -1   3   7    0.25    0.14
  -1   3   7    0.23    0.13
   1  -3   7    0.31    0.11
   1   3  -7    0.41    0.21
  -1   3  -7    0.41    0.11
  -1  -3   7    0.40    0.13
  -1  -3   7    0.33    0.12
   1  -3  -7    0.37    0.13
   1   3   7    0.45    0.14
  -1   3  -7    0.26    0.14
  -1  -3   7    0.21    0.12
   1  -3  -7    0.30    0.19
  -1   4   7   98.92    2.44
   1   4  -7   97.98    2.58
  -1  -4  -7   97.53    2.49
  -1   4   7   92.61    2.17
   1   4  -7   97.75    2.37
  -1   4   7   94.25    2.36
   1  -4   7   97.03    2.37
  -1   4   7   93.33    2.44
   1   4  -7   96.06    2.40
  -1  -4   7   99.26    2.35
  -1  -4   7   97.97    2.40
  -1  -4   7   97.71    2.42
   1  -4  -7   95.96    2.52
   1   4   7   93.38    2.42
  -1   4  -7   96.98    2.37
  -1   4  -7   96.68    2.39
   1   4   7   97.35    2.19
   1   5  -7   24.08    0.77
  -1  -5  -7   24.78    0.82
   1   5  -7   25.72    0.78
  -1   5   7   23.82    0.73
   1  -5   7   27.11    0.76
  -1   5   7   24.06    0.78
  -1   5   7   24.37    0.81
   1   5   7   24.54    0.74
  -1  -5   7   26.55    0.78
  -1   5  -7   25.43    0.79
   1  -5  -7   22.96    0.84
  -1  -5   7   25.38    0.85
  -1   5  -7   24.56    0.75
   1   5   7   23.71    0.78
  -1   6   7   77.09    2.06
  -1   6   7   75.47    1.84
   1  -6   7   79.94    1.99
  -1  -6  -7   78.00    2.07
   1   6  -7   78.13    2.00
   1  -6   7   76.97    2.03
   1   6  -7   75.73    2.01
  -1   6  -7   74.57    1.98
  -1  -6   7   77.50    2.04
   1   6   7   73.44    2.03
  -1   6  -7   79.45    2.02
   1  -6  -7   78.77    2.11
  -1  -6   7   79.90    2.01
  -1   6  -7   76.15    1.95
   1   6   7   75.64    1.85
  -1   7   7   14.64    0.62
   1  -7   7   13.76    0.67
  -1  -7  -7   14.02    0.63
   1   7  -7   14.24    0.60
  -1   7   7   15.37    0.60
   1   7  -7   14.48    0.63
   1  -7  -7   14.66    0.67
  -1   7  -7   14.52    0.59
   1   7   7   13.89    0.61
  -1   7  -7   15.00    0.58
   1   7   7   15.08    0.58
  -1   7  -7   14.35    0.63
  -1  -7   7   15.66    0.69
  -1   8   7   41.95    1.18
   1   8  -7   43.16    1.28
  -1   8   7   41.97    1.31
   1  -8   7   44.55    1.33
   1   8  -7   41.34    1.24
   1   8  -7   44.20    1.28
  -1  -8   7   43.07    1.30
   1   8   7   43.19    1.19
  -1   8  -7   43.45    1.29
   1   8   7   41.79    1.30
   1  -8  -7   41.64    1.32
   1   9  -7    9.19    0.54
  -1   9   7    9.02    0.54
   1  -9   7    7.97    0.60
  -1   9   7    8.42    0.51
  -1  -9   7    8.07    0.55
   1   9   7    7.75    0.51
   1   9   7    9.19    0.53
  -1   9  -7    8.70    0.51
   1 -10   7   29.10    1.07
  -1  10   7   28.26    1.06
  -1  10   7   29.98    0.98
   1  10  -7   29.47    1.04
   1  10   7   27.75    1.03
  -1  10  -7   29.22    1.05
   1  10   7   28.54    0.99
  -1 -10   7   27.77    1.02
   1  11  -7    0.37    0.30
   1 -11   7    0.64    0.36
  -1  11   7    0.43    0.27
  -1  11   7    0.73    0.32
  -1 -11   7    0.29    0.35
   1  11   7   -0.17    0.26
   1  11   7    0.11    0.29
  -1  11  -7    0.18    0.30
   1  12  -7   39.09    1.39
   1 -12   7   41.37    1.42
  -1  12   7   43.16    1.32
  -1  12   7   41.72    1.45
   1  12   7   43.93    1.43
   1  12   7   43.20    1.45
   1  12   7   40.84    1.32
  -1  12  -7   39.32    1.41
  -1 -12   7   41.07    1.38
  -1  13   7    2.91    0.45
   1 -13   7    2.70    0.51
  -1 -13   7    3.07    0.50
   1  13   7    2.84    0.47
   1   0  -8    0.23    0.20
   1   0  -8    0.15    0.12
  -1   0  -8    0.09    0.11
  -1   0   8   -0.05    0.10
   1   0   8    0.03    0.19
   1   0   8    0.06    0.09
   1   0   8   -0.04    0.08
  -1   0   8    0.11    0.12
  -1   0  -8    0.11    0.18
  -1   0   8    0.13    0.20
  -1   1   8   50.12    1.36
   1  -1   8   52.96    1.24
  -1   1   8   52.40    1.31
   1   1  -8   48.91    1.29
   1  -1   8   50.80    1.37
  -1  -1  -8   48.35    1.39
   1   1  -8   47.77    1.21
   1  -1   8   51.68    1.24
  -1   1   8   51.09    1.31
   1   1  -8   48.90    1.44
   1  -1   8   52.48    1.21
   1   1   8   49.61    1.35
   1  -1  -8   50.62    1.43
  -1   1  -8   47.72    1.26
  -1  -1   8   50.55    1.37
  -1  -1   8   50.98    1.29
   1   1   8   52.20    1.27
   1   1   8   52.40    1.27
  -1   1  -8   50.76    1.42
  -1  -1   8   51.95    1.30
  -1   2   8    5.56    0.31
   1  -2   8    5.89    0.39
   1   2  -8    5.78    0.38
  -1   2   8    5.80    0.38
   1  -2   8    5.87    0.23
  -1  -2  -8    4.63    0.36
   1  -2   8    5.39    0.23
   1   2  -8    5.08    0.27
   1   2  -8    5.58    0.25
  -1  -2  -8    5.93    0.29
  -1   2   8    5.57    0.31
   1  -2  -8    5.66    0.23
   1   2   8    5.34    0.35
  -1   2  -8    5.45    0.23
  -1  -2   8    5.78    0.27
   1   2   8    5.61    0.27
  -1  -2   8    5.40    0.27
   1   2   8    5.86    0.27
  -1   2  -8    5.63    0.39
  -1  -2   8    5.63    0.26
   1  -2  -8    5.73    0.40
  -1   2  -8    5.75    0.30
   1   3  -8    2.23    0.20
  -1   3   8    2.28    0.22
   1  -3   8    2.04    0.16
  -1   3   8    2.09    0.21
  -1  -3  -8    2.56    0.22
   1   3  -8    2.70    0.24
  -1  -3  -8    1.93    0.26
  -1   3   8    2.31    0.27
   1   3  -8    2.38    0.30
   1   3   8    2.32    0.26
   1  -3  -8    2.06    0.28
  -1   3  -8    2.51    0.19
   1   3   8    2.67    0.24
  -1  -3   8    2.54    0.22
  -1  -3   8    2.40    0.19
   1   3   8    2.51    0.22
   1  -3  -8    2.31    0.18
  -1   3  -8    2.27    0.28
  -1   3  -8    2.11    0.22
  -1  -3   8    3.02    0.24
  -1  -4  -8   35.21    1.05
   1  -4   8   36.08    0.94
   1   4  -8   33.96    0.95
  -1   4   8   34.11    1.01
   1   4  -8   34.16    0.97
  -1   4   8   34.33    0.91
  -1   4   8   36.07    1.02
   1   4  -8   32.96    1.12
  -1   4   8   34.50    1.01
  -1  -4   8   36.66    0.96
   1   4   8   33.84    0.99
  -1  -4   8   35.82    0.98
   1  -4  -8   34.38    1.09
  -1   4  -8   33.47    0.93
  -1   4  -8   34.38    0.98
   1   4   8   34.64    0.92
   1   4   8   35.00    0.99
  -1   5   8   68.58    1.88
  -1  -5  -8   72.44    1.92
   1   5  -8   71.93    1.82
  -1   5   8   70.45    1.83
   1  -5   8   72.46    1.81
  -1   5   8   76.01    1.89
   1   5  -8   70.94    1.85
  -1   5   8   68.79    1.69
  -1  -5   8   72.75    1.84
  -1   5  -8   74.08    1.85
   1   5   8   70.19    1.70
   1   5   8   68.36    1.79
   1  -5  -8   72.05    1.96
   1   5   8   68.91    1.87
  -1  -5   8   68.93    1.89
  -1   5  -8   68.46    1.81
  -1  -6  -8   10.28    0.53
  -1   6   8    9.05    0.50
   1   6  -8    9.36    0.48
  -1   6   8    9.25    0.50
  -1   6   8    9.57    0.46
   1   6  -8    9.79    0.47
   1  -6   8    9.52    0.60
   1  -6  -8   10.01    0.56
  -1   6  -8    9.14    0.45
  -1   6  -8    9.85    0.50
  -1  -6   8    9.78    0.56
   1   6   8    9.85    0.45
   1   6   8    9.30    0.48
   1   6   8    9.37    0.47
  -1   7   8   66.05    1.66
  -1  -7  -8   67.72    1.86
   1  -7   8   68.04    1.86
   1   7  -8   66.35    1.79
  -1   7   8   65.52    1.85
  -1   7   8   67.31    1.75
   1   7   8   65.28    1.71
   1  -7  -8   68.07    1.90
   1   7   8   67.86    1.68
  -1   7  -8   67.26    1.81
   1   7   8   65.07    1.83
  -1  -7   8   66.65    1.84
  -1   8   8    2.94    0.34
   1   8  -8    3.20    0.34
   1  -8   8    2.45    0.39
  -1   8   8    2.63    0.33
  -1   8  -8    2.84    0.34
   1   8   8    2.96    0.33
  -1  -8   8    2.55    0.39
   1   8   8    2.51    0.32
   1  -8  -8    2.85    0.37
  -1   9   8   13.28    0.66
  -1   9   8   13.32    0.64
   1   9  -8   14.39    0.66
   1  -9   8   13.07    0.73
  -1  -9   8   13.11    0.70
   1   9   8   12.88    0.64
  -1   9  -8   14.59    0.67
   1   9   8   12.98    0.61
  -1  10   8   28.00    0.97
  -1  10   8   29.71    1.06
   1 -10   8   27.31    1.06
   1  10  -8   27.17    1.00
  -1  10  -8   26.62    1.01
  -1 -10   8   26.38    1.02
   1  10   8   27.99    0.97
   1  10   8   26.98    1.02
  -1  11   8    8.18    0.59
   1 -11   8    7.19    0.61
  -1  11   8    7.00    0.57
   1  11  -8    6.85    0.55
  -1 -11   8    7.76    0.63
   1  11   8    7.68    0.56
  -1  11  -8    7.25    0.57
   1  11   8    7.71    0.57
   1  12  -8    9.95    0.69
  -1  12   8   10.11    0.65
   1 -12   8   10.27    0.76
  -1  12   8   10.09    0.67
   1  12   8    9.25    0.66
  -1  12  -8   11.57    0.70
   1  12   8   11.12    0.69
   1  12   8   10.12    0.66
  -1 -12   8   10.50    0.73
  -1   0   9    0.19    0.14
  -1   0  -9    0.08    0.13
   1   0   9    0.04    0.09
   1   0   9   -0.12    0.21
  -1   0   9    0.41    0.23
   1   0  -9    0.22    0.21
  -1   0   9    0.13    0.13
   1   0   9   -0.23    0.09
  -1   0  -9    0.00    0.21
   1  -1   9   53.56    1.29
   1  -1   9   54.00    1.32
   1  -1   9   53.82    1.48
  -1   1   9   56.21    1.48
   1   1  -9   54.20    1.38
  -1   1   9   54.57    1.39
   1  -1   9   54.16    1.32
   1   1  -9   54.30    1.56
  -1  -1  -9   54.13    1.52
  -1   1   9   52.96    1.40
   1   1   9   53.21    1.35
  -1   1  -9   52.39    1.35
   1   1   9   52.84    1.46
  -1  -1   9   55.67    1.38
   1   1   9   53.81    1.35
   1  -1  -9   54.55    1.54
  -1   1  -9   54.03    1.53
  -1  -1   9   53.69    1.38
  -1  -1   9   53.28    1.48
  -1  -2  -9   21.65    0.61
  -1   2   9   19.91    0.71
   1  -2   9   20.06    0.74
  -1   2   9   19.18    0.64
   1   2  -9   20.58    0.56
   1  -2   9   19.86    0.55
  -1   2   9   20.41    0.64
   1   2  -9   20.54    0.62
   1   2  -9   21.25    0.79
  -1  -2  -9   20.61    0.73
   1  -2   9   20.20    0.55
   1  -2  -9   21.09    0.78
   1   2   9   20.38    0.69
   1  -2  -9   20.87    0.54
   1   2   9   19.16    0.60
  -1   2  -9   20.53    0.62
  -1  -2   9   19.53    0.61
  -1  -2   9   19.06    0.73
   1   2   9   20.57    0.60
  -1   2  -9   21.32    0.76
  -1  -2   9   19.58    0.59
  -1  -2   9   19.59    0.61
  -1   2  -9   20.59    0.56
   1   3  -9    0.55    0.16
  -1   3   9    0.48    0.25
   1  -3   9    0.54    0.12
  -1  -3  -9    0.51    0.24
   1  -3   9    0.15    0.26
   1   3  -9    0.70    0.25
   1   3  -9    0.36    0.15
   1  -3   9    0.67    0.12
  -1   3   9    0.61    0.17
  -1   3   9    0.31    0.17
  -1   3  -9    0.17    0.17
   1   3   9    0.26    0.17
   1   3   9    0.57    0.15
  -1  -3   9    0.90    0.16
  -1   3  -9    0.43    0.12
   1   3   9    0.57    0.23
   1  -3  -9    0.44    0.14
  -1   3  -9    0.26    0.25
   1  -3  -9    0.35    0.26
  -1  -3   9    0.86    0.16
   1   3   9    0.48    0.16
  -1   4   9   92.13    2.40
   1   4  -9   90.43    2.56
   1   4  -9   93.09    2.31
  -1  -4  -9   92.24    2.47
   1   4  -9   88.15    2.34
   1  -4   9   97.32    2.31
  -1   4   9   96.49    2.15
  -1   4   9   96.77    2.37
   1   4   9   93.91    2.37
   1   4   9   92.44    2.33
  -1   4  -9   91.68    2.34
   1  -4  -9   95.80    2.51
   1   4   9   96.83    2.16
  -1   4  -9   92.98    2.56
  -1  -4   9   96.70    2.35
  -1   5   9   22.46    0.77
  -1   5   9   22.11    0.70
   1   5  -9   21.23    0.89
  -1   5   9   24.75    0.80
   1   5  -9   21.58    0.74
   1  -5   9   22.88    0.85
  -1  -5  -9   22.21    0.81
  -1   5  -9   22.30    0.75
   1  -5  -9   23.73    0.85
  -1  -5   9   22.95    0.86
   1   5   9   21.43    0.71
  -1   5  -9   20.69    0.88
   1   5   9   23.39    0.75
   1   5   9   23.21    0.76
  -1  -6  -9   69.20    1.89
   1  -6   9   67.16    1.89
  -1   6   9   69.47    1.80
  -1   6   9   70.73    1.68
  -1   6   9   65.54    1.86
   1   6  -9   69.49    1.80
   1   6  -9   66.30    2.00
  -1  -6   9   68.88    1.89
   1  -6  -9   67.78    1.93
   1   6   9   64.99    1.84
   1   6   9   70.88    1.77
   1   6   9   67.40    1.68
  -1   6  -9   69.31    1.82
  -1   7   9    7.74    0.46
  -1  -7  -9    9.58    0.52
   1   7  -9    8.30    0.47
   1   7  -9    7.96    0.55
  -1   7   9    8.95    0.48
   1  -7   9    8.11    0.55
  -1   7   9    7.77    0.47
   1  -7  -9    8.88    0.56
   1   7   9    8.16    0.47
  -1   7  -9    8.95    0.50
   1   7   9    7.90    0.44
  -1  -7   9    8.31    0.55
   1   7   9    8.13    0.46
  -1  -8  -9    7.72    0.51
  -1   8   9    7.95    0.49
   1  -8   9    8.03    0.58
  -1   8   9    7.72    0.49
  -1   8   9    7.63    0.47
   1   8  -9    8.56    0.51
   1  -8  -9    7.98    0.54
   1   8   9    7.27    0.47
   1   8   9    8.28    0.48
  -1  -8   9    8.03    0.58
  -1   8  -9    7.61    0.49
  -1   9   9    6.81    0.48
   1   9  -9    6.78    0.48
   1  -9   9    6.48    0.57
  -1   9   9    6.79    0.50
  -1  -9   9    6.96    0.55
   1   9   9    6.64    0.48
   1  -9  -9    7.25    0.55
  -1   9  -9    7.22    0.53
   1   9   9    5.47    0.45
   1  10  -9   24.32    0.90
  -1  10   9   21.08    0.85
  -1  10   9   21.07    0.90
   1 -10   9   22.25    0.95
  -1  10  -9   23.63    0.90
   1  10   9   20.13    0.83
   1  10   9   20.82    0.90
  -1 -10   9   22.41    0.93
  -1  11   9    0.07    0.29
   1 -11   9    0.43    0.41
  -1  11   9    0.10    0.27
   1  11  -9    0.47    0.31
  -1 -11   9    0.41    0.40
   1  11   9    0.16    0.31
  -1  11  -9    0.00    0.30
   1  11   9    0.21    0.28
   1   0 -10    0.50    0.28
  -1   0 -10   -0.06    0.14
  -1   0  10   -0.09    0.15
   1   0  10    0.20    0.11
   1   0  10   -0.13    0.25
  -1   0  10   -0.02    0.27
   1   0  10    0.38    0.11
  -1   0  10    0.24    0.14
  -1   0 -10    0.35    0.25
   1   1 -10  103.50    2.77
  -1  -1 -10   99.06    2.47
  -1  -1 -10  103.15    2.71
   1  -1  10  105.34    2.63
   1  -1  10  108.68    2.47
  -1   1  10  103.74    2.56
   1  -1  10  108.71    2.42
  -1   1  10  103.64    2.55
   1  -1  10  106.46    2.47
  -1   1  10  101.21    2.61
  -1  -1  10   97.43    2.61
  -1  -1  10  102.40    2.54
  -1  -1  10  105.46    2.54
   1   1  10  101.30    2.60
   1   1  10  105.87    2.50
   1   1  10  105.82    2.51
  -1   1 -10   99.44    2.48
  -1   1 -10   99.91    2.73
   1  -1 -10  101.46    2.75
   1  -2  10    7.85    0.28
   1  -2  10    7.01    0.27
  -1   2  10    7.83    0.37
  -1  -2 -10    8.87    0.48
  -1   2  10    7.80    0.49
   1  -2  10    7.15    0.52
   1   2 -10    7.72    0.53
   1   2 -10    8.26    0.29
   1   2  10    7.19    0.44
  -1   2 -10    8.42    0.37
  -1  -2  10    8.10    0.35
   1   2  10    7.97    0.34
  -1  -2  10    7.31    0.32
   1  -2 -10    7.64    0.51
  -1  -2  10    7.10    0.49
  -1   2 -10    8.75    0.51
  -1  -2  10    7.17    0.34
   1   2  10    7.54    0.33
   1  -3  10   15.89    0.68
   1  -3  10   15.88    0.47
  -1  -3 -10   15.43    0.66
  -1   3  10   15.05    0.63
   1   3 -10   15.44    0.71
   1   3 -10   14.61    0.49
  -1   3  10   16.12    0.57
   1  -3  10   16.24    0.47
  -1   3  10   15.70    0.51
   1   3  10   15.62    0.53
  -1  -3  10   15.83    0.52
   1  -3 -10   16.73    0.72
   1   3  10   15.92    0.63
  -1  -3  10   14.28    0.66
  -1   3 -10   14.14    0.68
  -1   3 -10   15.17    0.54
  -1   4  10   28.84    0.93
  -1   4  10   28.43    0.89
   1  -4  10   27.55    0.98
  -1  -4 -10   29.06    0.96
   1   4 -10   26.71    1.01
  -1   4  10   29.10    0.80
   1   4 -10   28.99    0.82
   1   4  10   27.57    0.86
   1   4  10   29.97    0.91
  -1  -4  10   28.17    0.97
   1  -4 -10   29.98    1.01
  -1   4 -10   28.78    0.86
   1   4  10   28.67    0.80
  -1   4 -10   29.47    1.03
  -1   5  10   13.95    0.60
  -1   5  10   13.80    0.59
  -1  -5 -10   14.98    0.63
   1   5 -10   15.14    0.54
  -1   5  10   14.87    0.54
   1  -5  10   13.72    0.67
   1   5 -10   13.05    0.70
   1   5  10   14.73    0.55
  -1  -5  10   13.94    0.68
   1   5  10   14.64    0.59
   1   5  10   14.34    0.56
  -1   5 -10   13.82    0.70
  -1   5 -10   15.19    0.58
   1  -5 -10   15.06    0.67
   1   6 -10   20.77    0.73
   1   6 -10   21.38    0.91
   1  -6  10   20.97    0.85
  -1   6  10   20.31    0.71
  -1   6  10   21.65    0.78
  -1   6  10   21.30    0.78
  -1  -6 -10   22.23    0.81
   1   6  10   20.87    0.75
  -1   6 -10   21.53    0.75
   1  -6 -10   21.74    0.85
   1   6  10   22.32    0.75
   1   6  10   22.47    0.73
  -1   6 -10   19.73    0.88
  -1  -6  10   21.09    0.87
   1  -7  10   34.80    1.20
  -1   7  10   36.93    1.05
  -1   7  10   35.69    1.10
   1   7 -10   35.16    1.27
  -1  -7 -10   35.89    1.16
  -1   7  10   35.78    1.15
   1   7 -10   37.24    1.11
   1  -7 -10   34.95    1.19
  -1   7 -10   37.13    1.12
   1   7  10   36.77    1.06
  -1  -7  10   35.16    1.20
   1   7  10   36.75    1.14
  -1   8  10    0.67    0.27
  -1   8  10    0.53    0.26
  -1  -8 -10    0.42    0.27
   1   8 -10    0.57    0.26
   1   8 -10    0.35    0.33
   1  -8  10    0.12    0.33
  -1   8  10    0.91    0.28
   1  -8 -10    0.58    0.30
  -1   8 -10    0.34    0.27
   1   8  10    0.80    0.28
  -1  -8  10    0.39    0.33
   1   8  10    0.60    0.24
   1   9 -10   12.14    0.60
  -1   9  10   11.84    0.64
   1   9 -10   11.58    0.71
   1  -9  10   12.32    0.74
  -1   9  10   11.75    0.61
   1   9  10   11.75    0.60
  -1   9 -10   13.07    0.63
   1   9  10   11.30    0.62
   1  -9 -10   13.10    0.68
  -1  -9  10   10.67    0.67
  -1  10  10   16.11    0.74
   1 -10  10   15.80    0.82
   1  10 -10   13.99    0.71
   1  10 -10   13.99    0.84
  -1  10  10   14.51    0.74
   1  10  10   16.33    0.74
   1  10  10   15.77    0.71
  -1  10 -10   15.55    0.76
  -1 -10  10   15.46    0.81
  -1  11  10    6.63    0.54
   1 -11  10    6.67    0.64
  -1  11  10    6.25    0.54
   1  11 -10    6.24    0.56
  -1 -11  10    5.38    0.60
  -1  11 -10    5.87    0.54
   1  11  10    7.02    0.57
   1  11  10    5.70    0.52
   1   0 -11    0.25    0.26
  -1   0  11   -0.04    0.26
   1   0  11   -0.13    0.23
   1   0  11    0.06    0.08
  -1   0 -11   -0.14    0.23
   1   0  11   -0.10    0.08
  -1   0  11    0.09    0.13
  -1  -1 -11   39.91    1.22
  -1   1  11   39.60    1.07
   1  -1  11   38.21    1.20
  -1   1  11   37.70    1.18
   1   1 -11   38.78    1.25
  -1   1 -11   38.40    1.22
  -1  -1  11   36.93    1.19
   1   1  11   40.05    1.01
  -1  -1  11   38.82    1.04
   1   1  11   37.74    1.17
   1  -1 -11   41.69    1.27
  -1   2  11   32.46    0.93
  -1  -2 -11   34.16    1.07
   1  -2  11   31.84    1.06
  -1   2  11   30.68    1.03
   1   2 -11   34.11    1.12
   1   2  11   32.70    0.89
   1   2  11   30.06    1.01
  -1   2 -11   33.29    0.88
   1  -2 -11   33.63    1.09
  -1  -2  11   31.85    0.90
  -1   2 -11   31.86    1.08
  -1  -2  11   32.02    1.08
   1  -3  11    3.97    0.40
  -1  -3 -11    4.31    0.39
  -1   3  11    3.72    0.37
  -1   3  11    3.89    0.30
   1  -3  11    4.00    0.20
   1   3 -11    3.60    0.39
   1   3  11    3.77    0.27
  -1   3 -11    3.22    0.37
  -1  -3  11    3.60    0.26
  -1   3 -11    3.54    0.30
  -1  -3  11    3.91    0.41
   1   3  11    3.67    0.36
   1  -3 -11    3.87    0.38
  -1   4  11   68.54    1.81
   1  -4  11   67.98    1.89
  -1   4  11   65.79    1.82
   1  -4  11   68.15    1.68
  -1  -4 -11   70.30    1.89
   1   4 -11   66.35    1.98
  -1   4  11   68.46    1.61
   1   4  11   65.07    1.79
  -1  -4  11   63.52    1.87
  -1  -4  11   65.73    1.73
  -1   4 -11   66.26    1.97
   1   4  11   67.87    1.77
  -1   4 -11   67.49    1.73
   1  -4 -11   71.77    1.94
   1   4  11   66.18    1.62
   1   5 -11   11.65    0.68
  -1   5  11   12.53    0.59
  -1  -5 -11   11.45    0.60
   1  -5  11   11.53    0.67
  -1   5  11   11.68    0.54
  -1   5  11   12.19    0.51
  -1   5 -11   11.64    0.67
   1  -5 -11   12.81    0.66
   1   5  11   11.75    0.52
  -1   5 -11   12.31    0.52
   1   5  11   12.02    0.56
   1   5  11   12.53    0.53
  -1  -5  11   13.23    0.66
  -1   6  11   68.43    1.83
   1   6 -11   63.80    2.02
  -1  -6 -11   64.80    1.89
  -1   6  11   66.69    1.85
  -1   6  11   69.19    1.67
   1  -6  11   66.93    1.92
  -1  -6  11   67.45    1.92
   1   6  11   65.93    1.78
   1   6  11   66.77    1.67
   1  -6 -11   69.82    1.95
  -1   6 -11   63.44    2.00
   1   6  11   66.75    1.83
  -1   6 -11   67.97    1.79
  -1   7  11    9.21    0.54
  -1   7  11    9.52    0.53
   1   7 -11    8.14    0.59
   1  -7  11    9.39    0.61
  -1   7  11    8.62    0.49
  -1  -7  11    8.95    0.64
  -1   7 -11    8.25    0.59
   1   7  11    8.65    0.48
   1   7  11    9.35    0.50
   1  -7 -11   10.04    0.61
  -1   7 -11    9.76    0.52
   1  -8  11   15.08    0.77
  -1   8  11   14.79    0.68
   1   8 -11   14.85    0.81
  -1   8  11   13.73    0.63
  -1   8  11   14.37    0.65
  -1   8 -11   14.98    0.80
  -1  -8  11   14.99    0.76
   1   8  11   15.44    0.65
  -1   8 -11   14.14    0.66
   1  -8 -11   14.58    0.74
   1   8  11   14.20    0.66
   1   9 -11    2.90    0.48
  -1   9  11    3.62    0.41
   1  -9  11    2.74    0.48
  -1   9  11    2.89    0.38
  -1   9 -11    2.94    0.45
   1   9  11    3.04    0.37
  -1  -9  11    2.64    0.45
   1   9  11    2.98    0.38
   1 -10  11    4.76    0.57
  -1  10  11    5.41    0.49
   1  10 -11    5.20    0.58
  -1  10  11    4.64    0.47
  -1 -10  11    5.04    0.59
   1  10  11    4.28    0.44
   1  10  11    5.51    0.49
  -1   0 -12    0.26    0.25
   1   0 -12    0.35    0.27
  -1   0  12   -0.01    0.27
   1   0  12   -0.29    0.25
  -1   0  12    0.07    0.13
   1   1 -12   29.92    1.06
  -1   1  12   30.49    0.86
   1  -1  12   28.69    1.02
  -1  -1 -12   31.14    1.02
  -1   1  12   27.74    0.99
   1   1  12   28.74    1.00
  -1  -1  12   29.67    0.83
   1   1  12   30.08    0.78
   1  -1 -12   30.99    1.05
  -1  -1  12   28.32    1.02
  -1   1 -12   30.10    1.03
  -1  -2 -12    4.28    0.40
   1  -2  12    3.80    0.41
  -1   2  12    4.09    0.29
  -1   2  12    4.02    0.39
   1   2 -12    3.83    0.42
  -1  -2  12    3.53    0.40
  -1  -2  12    3.80    0.25
   1   2  12    4.06    0.25
   1   2  12    3.83    0.38
   1  -2 -12    4.43    0.42
  -1   2 -12    4.68    0.44
  -1  -3 -12   19.80    0.76
   1  -3  12   17.40    0.80
  -1   3  12   19.35    0.77
   1   3 -12   20.69    0.85
  -1   3  12   18.63    0.66
  -1   3 -12   18.89    0.81
  -1  -3  12   19.19    0.60
   1  -3 -12   19.98    0.82
   1   3  12   19.65    0.62
  -1  -3  12   19.20    0.82
   1   3  12   18.70    0.76
   1  -4  12   15.55    0.47
  -1   4  12   15.51    0.61
   1   4 -12   15.30    0.75
  -1   4  12   16.13    0.68
  -1  -4 -12   16.17    0.70
   1  -4  12   16.27    0.75
   1   4  12   16.26    0.57
  -1  -4  12   15.26    0.54
   1  -4 -12   17.27    0.76
  -1  -4  12   15.07    0.73
   1   4  12   16.13    0.68
  -1   4 -12   16.28    0.76
   1   5 -12   16.24    0.78
  -1   5  12   16.41    0.59
   1  -5  12   15.06    0.75
   1  -5  12   15.67    0.51
  -1   5  12   16.08    0.69
  -1   5  12   16.05    0.64
  -1  -5 -12   17.35    0.72
   1   5  12   15.23    0.60
  -1   5 -12   15.36    0.78
   1   5  12   16.74    0.68
   1   5  12   15.79    0.60
  -1  -5  12   15.98    0.76
  -1  -5  12   16.32    0.56
   1  -5 -12   16.43    0.76
  -1   6  12    8.89    0.47
  -1   6  12    8.69    0.49
   1  -6  12    8.56    0.61
   1   6 -12    9.05    0.64
  -1   6  12    9.32    0.54
  -1   6 -12    8.61    0.60
   1  -6 -12    9.76    0.61
   1   6  12    8.83    0.52
   1   6  12    8.71    0.47
  -1  -6  12    8.47    0.60
   1   6  12    9.03    0.47
  -1   7  12   25.86    0.84
   1  -7  12   26.60    1.05
   1   7 -12   25.06    1.07
  -1   7  12   26.08    0.92
  -1   7  12   26.21    0.93
   1   7  12   25.35    0.89
   1   7  12   25.64    0.85
  -1  -7  12   25.29    1.04
   1  -7 -12   24.23    0.98
  -1   7 -12   24.88    1.06
   1  -8  12    2.00    0.43
   1   8 -12    1.47    0.39
  -1   8  12    2.28    0.33
  -1   8  12    2.58    0.36
   1   8  12    2.05    0.34
  -1  -8  12    1.68    0.42
  -1   8 -12    2.27    0.42
   1   8  12    2.45    0.33
  -1   9  12   11.28    0.61
   1  -9  12   10.89    0.74
   1   9 -12   10.02    0.71
  -1   9  12   11.19    0.64
   1   9  12    9.77    0.59
  -1  -9  12   11.24    0.74
   1   9  12   10.81    0.61
  -1   9 -12   11.50    0.76
  -1   0  13   -0.04    0.26
   1   0  13    0.00    0.28
  -1   0  13    0.04    0.13
  -1   0 -13   -0.01    0.25
   1   0 -13   -0.30    0.25
   1  -1  13   12.96    0.67
   1   1 -13   13.33    0.68
  -1   1  13   12.64    0.46
  -1   1  13   11.50    0.62
  -1  -1 -13   11.57    0.62
  -1  -1  13   13.52    0.44
  -1  -1  13   12.00    0.65
  -1   1 -13   12.14    0.66
   1  -1 -13   14.27    0.68
   1   1  13   12.30    0.64
  -1   2  13   12.49    0.48
   1   2 -13   13.04    0.69
  -1  -2 -13   12.34    0.63
   1  -2  13   12.79    0.66
  -1   2  13   12.21    0.64
  -1   2 -13   13.07    0.68
   1   2  13   12.84    0.42
   1   2  13   12.14    0.61
  -1  -2  13   12.55    0.43
  -1  -2  13   11.90    0.65
   1  -2 -13   11.45    0.68
  -1  -3 -13    1.60    0.33
   1  -3  13    1.90    0.38
  -1   3  13    1.90    0.35
   1   3 -13    1.83    0.37
  -1   3  13    1.94    0.23
   1  -3 -13    2.28    0.38
  -1   3 -13    1.70    0.35
   1   3  13    1.90    0.33
  -1  -3  13    1.72    0.36
  -1  -3  13    2.13    0.19
   1   3  13    1.93    0.20
   1   4 -13   14.13    0.75
   1  -4  13   12.86    0.72
  -1   4  13   13.86    0.66
  -1   4  13   13.50    0.56
  -1  -4  13   13.21    0.47
   1   4  13   13.47    0.64
   1   4  13   13.92    0.52
  -1   4 -13   13.68    0.70
   1  -4 -13   12.76    0.70
  -1  -4  13   12.94    0.72
   1   5 -13   10.49    0.70
  -1   5  13   11.75    0.62
   1  -5  13   11.72    0.70
  -1   5  13   11.51    0.53
   1  -5 -13   12.85    0.69
   1   5  13   12.30    0.62
   1   5  13   11.89    0.52
  -1  -5  13   12.76    0.47
  -1   5 -13   11.64    0.67
  -1  -5  13   11.30    0.68
   1  -6  13    8.41    0.62
   1   6 -13    8.35    0.61
  -1   6  13    8.92    0.49
  -1   6  13    7.85    0.56
  -1  -6  13    7.97    0.61
  -1   6 -13    7.65    0.62
  -1  -6  13    8.15    0.40
   1   6  13    8.15    0.45
   1   6  13    8.14    0.52
   1   7 -13    8.22    0.65
   1  -7  13    7.98    0.62
  -1   7  13    7.95    0.50
  -1   7  13    7.50    0.53
  -1   7  13    7.61    0.46
  -1   7 -13    8.43    0.65
  -1  -7  13    7.31    0.62
   1   7  13    7.11    0.48
   1   7  13    7.81    0.48
  -1   8  13    6.52    0.50
   1   8 -13    6.90    0.66
  -1   8  13    6.30    0.49
   1  -8  13    7.57    0.65
  -1   8 -13    6.44    0.60
   1   8  13    7.12    0.49
  -1  -8  13    6.24    0.62
   1   8  13    6.93    0.48
   1   0 -14   -0.05    0.29
  -1   0 -14    0.20    0.27
   1   0  14    0.04    0.28
  -1   0  14    0.15    0.13
  -1   0  14   -0.27    0.26
   1  -1  14   28.79    1.08
  -1   1  14   30.96    1.10
  -1   1  14   30.95    0.86
  -1  -1 -14   30.38    1.08
   1   1 -14   28.21    1.11
  -1   1 -14   30.05    1.11
  -1  -1  14   30.48    1.11
   1  -1 -14   28.87    1.10
   1   1  14   31.72    1.09
  -1   2  14    6.02    0.33
   1   2 -14    6.66    0.55
  -1  -2 -14    5.86    0.53
   1  -2  14    5.21    0.51
  -1   2  14    6.46    0.52
  -1   2 -14    6.09    0.52
   1   2  14    5.26    0.48
   1  -2 -14    5.82    0.52
  -1  -2  14    6.51    0.55
  -1   3  14    0.33    0.29
   1   3 -14    0.23    0.31
   1  -3  14    0.57    0.34
  -1   3  14    0.43    0.18
  -1   3 -14    0.09    0.31
   1  -3 -14    0.17    0.32
   1   3  14    0.42    0.29
  -1  -3  14    0.11    0.33
   1  -4  14   11.66    0.70
   1   4 -14   13.86    0.77
  -1   4  14   14.18    0.70
  -1   4  14   12.88    0.55
   1  -4 -14   12.37    0.69
   1   4  14   13.66    0.51
  -1  -4  14   13.45    0.74
   1   4  14   13.59    0.66
  -1   4 -14   12.75    0.73
   1  -5  14   11.04    0.70
  -1   5  14   11.46    0.64
  -1   5  14   11.31    0.54
   1   5 -14   12.03    0.74
  -1   5 -14   12.11    0.72
   1   5  14   11.27    0.50
   1   5  14   11.64    0.63
  -1  -5  14    9.83    0.69
  -1   6  14    6.85    0.47
   1  -6  14    6.16    0.60
   1   6 -14    7.08    0.65
  -1   6  14    6.19    0.55
  -1   6 -14    7.25    0.64
  -1  -6  14    7.93    0.67
   1   6  14    7.12    0.42
   1   7 -14   20.33    1.01
  -1   7  14   20.84    0.82
  -1   7  14   19.58    0.84
   1  -7  14   19.38    0.98
  -1  -7  14   21.71    0.99
   1   7  14   21.06    0.79
  -1   7 -14   21.56    1.01
  -1   0  15   -0.22    0.31
  -1   0 -15   -0.27    0.30
   1   0 -15   -0.20    0.33
   1   0  15   -0.17    0.31
   1  -1  15   15.27    0.78
  -1   1  15   15.44    0.78
   1   1 -15   14.61    0.78
  -1   1 -15   14.09    0.74
   1   1  15   15.39    0.78
   1  -1 -15   14.95    0.79
  -1  -1  15   13.99    0.78
   1   2 -15   19.84    0.93
  -1   2  15   20.70    0.88
   1  -2  15   20.47    0.93
  -1  -2  15   18.36    0.89
   1   2  15   23.11    0.92
   1  -2 -15   20.11    0.92
  -1   2 -15   19.51    0.90
   1   3 -15    2.20    0.42
   1  -3  15    2.09    0.43
  -1   3  15    2.32    0.42
  -1  -3  15    2.29    0.45
   1   3  15    1.65    0.38
  -1   3 -15    1.67    0.39
   1  -4  15   27.98    1.13
  -1   4  15   29.49    1.09
  -1   4  15   29.98    0.92
   1   4 -15   28.30    1.18
  -1   4 -15   27.69    1.15
  -1  -4  15   27.89    1.13
   1   4  15   30.09    1.08
  -1   5  15    3.67    0.46
   1   5 -15    3.04    0.50
  -1   5  15    3.64    0.33
   1  -5  15    3.66    0.53
   1   5  15    4.61    0.48
  -1  -5  15    4.65    0.54
  -1   5 -15    3.18    0.50
  -1   0  16   -0.02    0.37
   1   0  16    0.62    0.38
   1   0 -16   -0.47    0.33
   1   1 -16   41.95    1.49
  -1   1  16   42.16    1.44
   1  -1  16   42.64    1.44
   1   1  16   43.53    1.43
  -1  -1  16   41.15    1.46
  -2   1   0   -0.17    0.06
   2   1   0   -0.16    0.06
   2  -1   0   -0.19    0.06
   2  -1   0   -0.20    0.06
  -2   1   0   -0.12    0.06
   2  -1   0   -0.15    0.08
  -2   1   0   -0.06    0.08
   2   1   0    0.02    0.06
  -2   2   0   68.01    1.63
  -2  -2   0   67.76    1.61
   2  -2   0   66.94    1.64
  -2   2   0   64.16    1.64
   2  -2   0   68.70    1.63
  -2  -2   0   67.91    1.65
   2   3   0  245.15    5.74
   2   3   0  241.39    5.70
   2   3   0  241.97    5.82
   2  -3   0  251.45    5.74
   2  -3   0  243.18    5.81
  -2   3   0  247.25    5.74
  -2   4   0  160.61    3.88
  -2   4   0  163.31    3.93
   2   4   0  161.54    3.86
   2   4   0  166.01    3.89
   2   4   0  162.27    3.94
   2  -4   0  164.47    3.93
   2   5   0  270.99    6.55
   2   5   0  278.61    6.46
  -2   5   0  279.07    6.47
   2   5   0  274.27    6.42
  -2   5   0  266.01    6.54
  -2   6   0   21.97    0.73
   2   6   0   22.00    0.65
   2   6   0   23.69    0.75
  -2   6   0   21.91    0.65
  -2   6   0   22.90    0.75
   2   7   0   13.74    0.50
   2   7   0   14.35    0.59
  -2   7   0   13.89    0.51
   2   7   0   14.14    0.57
  -2   7   0   13.56    0.59
  -2   7   0   14.33    0.58
   2   7   0   14.11    0.57
   2   8   0   12.71    0.58
  -2   8   0   13.11    0.61
  -2   8   0   13.94    0.60
   2   8   0   12.61    0.51
   2   8   0   12.81    0.56
   2   8   0   12.77    0.57
  -2   8   0   13.87    0.54
   2   9   0   27.84    0.94
   2   9   0   28.01    0.85
  -2   9   0   27.34    0.86
  -2   9   0   27.43    0.96
  -2   9   0   25.74    0.94
   2   9   0   27.30    0.95
   2   9   0   28.36    0.96
  -2  10   0   21.54    0.76
  -2  10   0   20.32    0.85
  -2  10   0   22.86    0.86
   2  10   0   21.01    0.74
   2  10   0   21.07    0.84
   2  10   0   20.63    0.81
   2  10   0   21.08    0.83
  -2  11   0   77.58    2.25
   2  11   0   79.75    2.27
   2  11   0   84.00    2.04
   2  11   0   81.46    2.28
  -2  11   0   81.22    2.04
   2  11   0   79.70    2.23
  -2  11   0   82.12    2.28
   2  12   0    3.17    0.41
  -2  12   0    2.88    0.37
   2  12   0    2.96    0.42
   2  12   0    2.50    0.36
  -2  12   0    2.14    0.36
   2  12   0    3.13    0.40
  -2  12   0    2.64    0.39
   2  13   0    7.59    0.61
   2  13   0    6.84    0.53
   2  13   0    7.27    0.51
  -2  13   0    8.98    0.60
  -2  13   0    7.82    0.59
  -2  13   0    8.18    0.62
   2  13   0    6.88    0.57
  -2  13   0    6.85    0.51
  -2  14   0    3.57    0.51
  -2  14   0    4.08    0.50
  -2  14   0    3.38    0.45
   2  14   0    4.28    0.49
   2  14   0    3.96    0.49
  -2  14   0    3.96    0.50
   2  14   0    3.30    0.45
  -2   1   1  294.83    6.86
  -2  -1  -1  294.37    6.86
   2   1  -1  293.77    7.12
  -2   1   1  291.27    7.01
  -2  -1  -1  296.43    6.73
  -2   1   1  287.43    6.94
   2  -1   1  288.04    6.91
  -2  -1   1  286.80    7.04
   2   1   1  290.39    6.80
   2  -1  -1  284.78    7.01
  -2   1  -1  284.21    6.92
  -2   1  -1  276.66    6.87
   2  -1  -1  275.26    7.11
   2  -1  -1  298.63    6.74
  -2  -1   1  291.06    6.91
  -2   1  -1  290.58    6.87
   2   1   1  284.39    6.92
  -2   2   1   41.26    1.03
   2   2  -1   42.11    1.03
   2  -2   1   40.01    1.03
   2  -2  -1   41.35    1.05
  -2  -2   1   41.59    1.03
   2  -2  -1   41.38    1.03
  -2  -2   1   41.71    1.05
   2   2   1   40.57    1.02
   2   2   1   40.83    1.04
  -2   2  -1   42.81    1.05
  -2   2  -1   41.85    1.04
  -2  -2   1   39.33    1.02
   2   3  -1  112.26    2.74
   2   3  -1  114.68    2.78
   2  -3   1  116.94    2.77
   2   3  -1  116.11    2.73
  -2  -3  -1  116.87    2.74
  -2   3   1  117.68    2.74
  -2   3  -1  112.40    2.77
   2   3   1  113.09    2.72
  -2  -3   1  114.45    2.72
  -2   3  -1  115.93    2.75
   2  -3  -1  111.70    2.86
   2  -3  -1  113.54    2.78
  -2  -3   1  114.68    2.78
   2  -3  -1  113.77    2.73
  -2  -3   1  113.30    2.73
   2   4  -1   52.21    1.31
  -2   4   1   49.76    1.33
  -2   4   1   51.51    1.31
   2   4  -1   52.25    1.30
   2  -4   1   51.14    1.31
   2   4  -1   51.50    1.33
  -2  -4   1   52.05    1.33
   2   4   1   49.45    1.31
  -2   4  -1   49.65    1.31
   2   4   1   49.84    1.32
  -2   4  -1   51.42    1.32
   2   4   1   48.39    1.29
   2   5  -1   49.31    1.32
   2   5  -1   50.86    1.31
   2   5  -1   51.06    1.34
  -2   5   1   50.12    1.33
   2  -5   1   50.65    1.32
  -2   5   1   48.29    1.33
   2   5   1   49.59    1.32
   2   5   1   47.70    1.30
  -2   5  -1   50.94    1.33
  -2   5  -1   52.01    1.33
   2   5   1   48.09    1.33
   2   6  -1  119.18    3.07
  -2   6   1  125.42    3.04
  -2   6   1  123.24    2.74
   2   6  -1  120.97    3.01
   2   6  -1  124.86    3.04
   2   6   1  122.05    2.73
  -2   6  -1  124.10    3.04
  -2   6  -1  119.41    2.72
   2   6   1  125.29    3.01
   2   6   1  124.98    3.08
   2   6   1  124.22    3.04
  -2   6  -1  121.82    3.06
   2   7  -1   18.05    0.56
   2   7  -1   16.97    0.66
  -2   7   1   16.06    0.58
  -2   7   1   17.20    0.64
   2   7  -1   18.28    0.65
   2   7  -1   17.12    0.63
  -2   7   1   16.97    0.64
   2   7   1   15.38    0.62
  -2   7  -1   17.60    0.63
  -2   7  -1   17.17    0.57
   2   7   1   17.24    0.57
   2   7   1   17.54    0.63
  -2   7  -1   17.22    0.65
   2   8  -1   44.80    1.14
  -2   8   1   43.78    1.30
  -2   8   1   43.78    1.31
   2   8  -1   44.02    1.30
  -2   8   1   43.43    1.16
   2   8  -1   43.57    1.26
   2   8  -1   42.18    1.28
   2   8   1   42.49    1.29
   2   8   1   44.75    1.16
   2   8   1   42.98    1.29
  -2   8  -1   43.69    1.30
  -2   8  -1   44.05    1.31
  -2   8  -1   43.63    1.15
  -2   9   1    3.47    0.39
   2   9  -1    3.28    0.33
   2   9  -1    2.94    0.33
   2   9  -1    2.91    0.34
   2   9  -1    2.79    0.37
  -2   9   1    3.06    0.35
  -2   9   1    3.41    0.36
  -2   9  -1    3.43    0.39
   2   9   1    3.25    0.36
  -2  -9   1    3.64    0.36
  -2   9  -1    3.37    0.35
   2   9   1    2.91    0.32
  -2   9  -1    2.89    0.35
   2   9   1    2.82    0.34
   2   9   1    3.22    0.37
  -2  10   1    8.92    0.58
   2  10  -1    9.84    0.56
   2  10  -1    8.99    0.52
   2  10  -1    9.55    0.54
  -2  10   1    9.78    0.58
   2  10  -1    9.28    0.49
  -2  10   1    9.69    0.52
   2  10   1    9.36    0.51
  -2  10  -1   10.13    0.60
   2  10   1    9.57    0.53
  -2  10  -1    9.05    0.52
  -2  10  -1    8.73    0.55
   2  10   1    8.64    0.54
   2  10   1    8.69    0.53
  -2  11   1   20.52    0.86
   2  11  -1   20.81    0.78
   2  11  -1   20.14    0.84
   2  11  -1   20.55    0.87
   2  11  -1   21.62    0.87
  -2  11   1   22.39    0.90
  -2  11   1   21.21    0.79
  -2  11  -1   21.37    0.88
   2  11   1   22.11    0.80
  -2  11  -1   23.08    0.81
   2  11   1   21.37    0.87
  -2  11  -1   22.54    0.90
   2  11   1   19.06    0.85
   2  11   1   21.98    0.86
   2  12  -1    0.02    0.28
  -2  12   1    0.25    0.27
   2  12  -1   -0.12    0.26
   2  12  -1    0.00    0.27
   2  12  -1   -0.25    0.27
  -2  12   1    0.24    0.28
  -2  12   1    0.21    0.28
  -2  12  -1   -0.15    0.25
  -2  12  -1    0.44    0.28
   2  12   1    0.28    0.27
   2  12   1   -0.35    0.22
  -2  12  -1    0.15    0.29
  -2  12  -1   -0.07    0.26
   2  12   1    0.47    0.26
   2  12   1    0.23    0.29
   2  13  -1    2.37    0.40
   2  13  -1    1.55    0.37
   2  13  -1    1.72    0.37
  -2  13   1    2.39    0.41
   2  13  -1    1.31    0.33
  -2  13   1    1.84    0.38
  -2  13   1    2.12    0.37
  -2  13  -1    1.54    0.35
   2  13   1    1.63    0.35
  -2  13  -1    2.44    0.39
  -2  13  -1    1.80    0.36
  -2  13  -1    1.71    0.37
   2  13   1    1.59    0.37
   2  13   1    2.05    0.37
   2  14  -1   28.59    1.17
  -2  14   1   28.08    1.05
   2  14  -1   29.32    1.20
   2  14  -1   28.51    1.04
  -2  14   1   27.31    1.17
   2  14  -1   31.14    1.18
  -2  14   1   29.84    1.17
  -2  14   1   30.71    1.20
   2  14   1   28.93    1.17
  -2  14  -1   24.90    1.01
  -2  14  -1   28.93    1.18
   2  14   1   29.45    1.07
  -2  14  -1   26.65    1.13
   2  14   1   29.09    1.14
  -2  14  -1   29.06    1.17
  -2   0  -2  165.24    3.88
  -2   0   2  168.69    3.92
   2   0  -2  161.07    3.92
   2   0   2  166.09    3.90
   2   0  -2  163.71    4.04
  -2   0   2  168.59    3.92
  -2   0  -2  163.01    3.80
   2   1  -2    2.64    0.18
  -2   1   2    4.13    0.21
  -2  -1  -2    2.82    0.13
   2  -1   2    3.80    0.14
  -2   1   2    4.07    0.16
  -2   1   2    3.86    0.20
  -2  -1  -2    2.99    0.16
  -2  -1   2    3.74    0.16
  -2  -1   2    4.06    0.18
  -2   1  -2    2.66    0.18
   2  -1  -2    2.73    0.18
   2  -1  -2    3.00    0.16
   2   1   2    4.09    0.17
  -2   1  -2    2.77    0.13
   2   1   2    3.95    0.13
   2   1   2    4.08    0.16
  -2   2   2   59.04    1.43
   2   2  -2   58.23    1.44
  -2  -2  -2   60.71    1.46
   2  -2   2   59.40    1.44
   2   2  -2   58.45    1.47
  -2   2   2   58.50    1.52
   2  -2   2   60.94    1.46
  -2   2   2   58.22    1.48
  -2  -2   2   60.17    1.44
  -2  -2   2   57.35    1.43
  -2  -2   2   60.10    1.47
   2   2   2   59.41    1.46
   2  -2  -2   59.51    1.54
   2   2   2   58.75    1.43
  -2   2  -2   59.16    1.46
   2   2   2   58.34    1.46
  -2   2  -2   57.55    1.44
   2  -2  -2   60.85    1.43
   2   3  -2  153.26    3.83
   2   3  -2  155.58    3.75
   2  -3   2  163.84    3.81
  -2   3   2  157.54    3.84
  -2   3   2  165.67    3.95
  -2   3   2  164.70    3.77
   2  -3   2  165.41    3.78
  -2  -3  -2  158.22    3.77
   2   3  -2  154.85    3.76
   2  -3  -2  153.85    3.94
  -2   3  -2  150.52    3.80
  -2  -3   2  163.07    3.75
  -2  -3   2  163.53    3.83
  -2   3  -2  155.54    3.78
  -2  -3   2  161.09    3.76
   2   3   2  163.11    3.89
   2   3   2  159.78    3.82
   2  -3  -2  161.99    3.76
   2  -4   2    2.16    0.17
   2   4  -2    1.85    0.18
  -2   4   2    1.71    0.18
   2   4  -2    1.77    0.19
   2   4  -2    1.72    0.18
  -2   4   2    2.03    0.19
  -2   4  -2    1.72    0.20
   2  -4  -2    1.75    0.22
  -2   4  -2    2.25    0.20
   2   4   2    2.05    0.17
   2  -4  -2    1.45    0.16
   2   4   2    2.08    0.20
  -2  -4   2    3.03    0.22
   2   5  -2  125.85    3.17
   2   5  -2  127.38    3.13
   2  -5   2  134.31    3.16
  -2   5   2  125.39    3.18
   2   5  -2  128.23    3.11
  -2   5   2  131.25    3.13
  -2   5  -2  124.78    3.15
   2   5   2  134.17    3.15
   2  -5  -2  126.46    3.27
   2   5   2  130.66    3.18
  -2   5  -2  128.85    3.15
  -2   6   2   61.30    1.67
   2   6  -2   66.40    1.70
   2  -6   2   63.05    1.64
   2   6  -2   66.30    1.67
   2   6  -2   65.68    1.69
  -2   6   2   63.39    1.52
   2   6   2   62.77    1.68
   2   6   2   65.20    1.71
  -2   6  -2   64.67    1.69
  -2   6  -2   63.22    1.69
   2   6   2   63.37    1.52
  -2   7   2    2.52    0.28
   2   7  -2    3.13    0.31
   2   7  -2    3.28    0.26
  -2   7   2    3.92    0.31
  -2   7   2    2.85    0.29
   2   7  -2    2.69    0.29
   2  -7   2    3.12    0.33
   2   7  -2    3.62    0.31
   2   7   2    3.66    0.32
  -2   7  -2    3.45    0.31
   2   7   2    2.86    0.27
  -2   7  -2    3.00    0.28
   2   7   2    3.19    0.30
  -2   7  -2    3.72    0.28
   2  -8   2    7.56    0.51
   2   8  -2    6.48    0.36
   2   8  -2    6.79    0.43
  -2   8   2    6.90    0.43
   2   8  -2    5.26    0.39
  -2   8   2    6.22    0.43
   2   8  -2    5.70    0.41
  -2   8   2    6.36    0.44
   2   8   2    5.88    0.41
   2   8   2    6.56    0.41
  -2   8  -2    6.37    0.43
   2   8   2    6.20    0.43
  -2   8  -2    5.64    0.40
   2   8   2    6.03    0.43
  -2   8  -2    6.32    0.48
  -2  -8   2    6.76    0.42
  -2   9   2   68.46    1.87
   2   9  -2   66.61    1.83
   2   9  -2   65.72    1.63
  -2   9   2   67.89    1.89
   2   9  -2   63.58    1.85
   2   9  -2   63.40    1.86
  -2   9   2   69.22    1.70
  -2   9  -2   68.29    1.87
   2   9   2   67.73    1.69
   2   9   2   68.08    1.89
  -2   9  -2   65.07    1.86
   2   9   2   66.32    1.85
  -2  -9   2   69.16    1.75
  -2   9  -2   66.48    1.66
   2   9   2   66.54    1.87
   2  10  -2    7.51    0.46
   2  10  -2    7.19    0.54
  -2  10   2    8.09    0.49
  -2  10   2    8.03    0.52
   2  10  -2    8.06    0.49
  -2  10   2    8.01    0.51
   2  10  -2    7.58    0.49
  -2  10  -2    7.34    0.51
  -2  10  -2    7.85    0.52
   2  10   2    7.71    0.53
  -2 -10   2    7.90    0.54
  -2  10  -2    8.18    0.46
   2  10   2    6.87    0.49
   2  10   2    7.15    0.47
   2  10   2    7.74    0.52
   2  11  -2   95.08    2.25
  -2  11   2   90.44    2.28
   2  11  -2   91.76    2.55
  -2  11   2   89.04    2.52
  -2  11   2   95.29    2.58
   2  11  -2   94.48    2.55
   2  11  -2   91.49    2.49
  -2  11  -2   94.92    2.50
   2  11   2   88.21    2.49
  -2  11  -2   92.63    2.54
   2  11   2   92.83    2.29
  -2  11  -2   96.76    2.56
  -2  11  -2   90.70    2.24
   2  11   2   89.88    2.55
   2  11   2   90.04    2.53
   2  12  -2    8.96    0.54
   2  12  -2    8.09    0.57
  -2  12   2    8.17    0.57
  -2  12   2    7.71    0.55
   2  12  -2    8.12    0.56
  -2  12   2    8.03    0.57
   2  12  -2    7.79    0.57
   2  12   2    8.59    0.56
  -2  12  -2    8.19    0.54
   2  12   2    6.86    0.57
   2  12   2    7.64    0.53
  -2  12  -2    8.46    0.59
  -2  12  -2    8.04    0.54
  -2  12  -2    8.63    0.59
   2  13  -2    8.16    0.60
  -2  13   2    8.54    0.64
   2  13  -2    8.40    0.64
  -2  13   2    8.80    0.63
   2  13  -2    7.77    0.61
  -2  13   2    8.11    0.59
   2  13  -2    7.90    0.55
   2  13   2    6.83    0.54
   2  13   2    7.26    0.56
  -2  13  -2    7.79    0.60
  -2  13  -2    6.80    0.56
  -2  13  -2    7.56    0.55
   2  13   2    7.64    0.56
  -2  13  -2    6.65    0.54
   2  14  -2    4.74    0.54
   2  14  -2    4.42    0.52
  -2  14   2    4.72    0.53
   2  14  -2    5.52    0.55
  -2  14   2    4.84    0.53
  -2  14   2    4.07    0.51
   2  14  -2    4.19    0.47
  -2  14   2    5.67    0.58
   2  14   2    4.46    0.53
   2  14   2    4.44    0.53
   2  14   2    4.68    0.52
  -2  14  -2    5.13    0.50
  -2  14  -2    3.63    0.48
  -2   0   3  173.02    4.05
  -2   0   3  174.40    4.05
   2   0  -3  165.78    4.04
   2   0  -3  167.82    4.18
  -2   1   3   43.60    1.14
  -2   1   3   43.15    1.09
   2   1  -3   40.92    1.08
   2  -1   3   43.56    1.02
  -2  -1  -3   42.18    1.04
  -2   1   3   43.38    1.02
  -2   1   3   43.47    1.09
  -2  -1  -3   41.52    1.07
  -2  -1   3   43.05    1.02
  -2   1  -3   42.22    1.07
  -2   1  -3   42.31    1.02
   2   1   3   44.61    1.07
   2  -1  -3   42.49    1.09
   2   1   3   44.25    1.05
   2  -1  -3   42.16    1.02
   2  -1  -3   41.49    1.14
  -2  -1   3   44.05    1.08
   2  -1  -3   40.67    1.09
   2   1   3   44.33    1.02
   2   2  -3   62.47    1.57
  -2   2   3   68.94    1.68
  -2   2   3   67.73    1.57
  -2  -2  -3   62.73    1.60
  -2  -2  -3   62.82    1.62
   2  -2   3   68.90    1.61
   2   2  -3   62.83    1.69
  -2   2   3   66.56    1.63
   2  -2   3   66.58    1.58
   2   2  -3   61.89    1.61
  -2   2   3   67.60    1.63
  -2  -2   3   66.44    1.57
   2   2   3   67.63    1.62
   2  -2  -3   64.54    1.57
  -2  -2   3   67.73    1.62
  -2  -2   3   66.45    1.58
   2   2   3   67.41    1.60
  -2   2  -3   62.33    1.58
  -2   2  -3   63.25    1.60
   2  -2  -3   62.14    1.68
  -2   3   3    5.41    0.25
   2   3  -3    4.54    0.25
   2   3  -3    4.03    0.24
   2   3  -3    4.57    0.25
  -2   3   3    5.83    0.26
  -2  -3  -3    4.47    0.24
  -2  -3  -3    4.22    0.22
  -2  -3  -3    4.71    0.27
   2  -3   3    5.47    0.23
   2  -3  -3    4.34    0.23
  -2   3  -3    4.28    0.22
  -2  -3   3    5.91    0.26
   2   3   3    5.69    0.22
   2  -3  -3    4.29    0.30
  -2   3  -3    4.46    0.27
   2   3   3    5.24    0.24
  -2  -3   3    5.16    0.26
  -2  -3   3    5.95    0.26
   2   4  -3   56.63    1.46
  -2   4   3   57.90    1.46
   2   4  -3   57.94    1.46
   2  -4   3   59.27    1.46
   2   4  -3   56.91    1.49
  -2   4   3   56.27    1.50
   2  -4  -3   57.22    1.45
   2   4   3   57.68    1.49
   2   4   3   56.93    1.48
   2  -4  -3   58.50    1.55
  -2  -4   3   58.06    1.49
  -2   4  -3   55.98    1.46
  -2  -4   3   58.59    1.46
  -2   4  -3   57.47    1.48
  -2   5   3   70.33    1.64
   2   5  -3   72.04    1.83
   2   5  -3   71.23    1.80
  -2   5   3   70.19    1.84
   2  -5   3   71.47    1.80
   2   5  -3   71.25    1.79
  -2   5   3   69.78    1.79
  -2   5  -3   71.44    1.82
   2  -5  -3   70.99    1.89
   2   5   3   71.64    1.83
   2   5   3   67.99    1.64
  -2   5  -3   69.96    1.80
   2   6  -3  158.56    3.94
   2   6  -3  170.65    3.98
  -2   6   3  161.54    3.61
   2  -6   3  169.10    3.91
  -2   6   3  169.08    3.97
  -2   6   3  158.13    4.04
   2   6  -3  158.91    4.02
   2  -6   3  172.97    4.01
   2  -6  -3  165.46    4.15
  -2   6  -3  157.91    4.00
   2   6   3  159.58    3.60
  -2   6  -3  163.13    3.99
   2   6   3  166.65    4.04
   2   7  -3   44.19    1.09
   2   7  -3   44.34    1.27
  -2   7   3   42.68    1.16
   2   7  -3   45.41    1.27
  -2   7   3   43.42    1.28
  -2   7   3   43.63    1.26
   2  -7   3   43.43    1.24
   2   7  -3   43.06    1.24
  -2   7  -3   44.17    1.24
  -2  -7   3   43.53    1.20
   2   7   3   44.25    1.14
   2   7   3   43.66    1.27
  -2   7  -3   42.66    1.10
  -2   7  -3   45.08    1.29
  -2   8   3   31.41    1.04
   2   8  -3   33.16    1.04
  -2   8   3   32.08    1.05
   2   8  -3   34.97    1.07
   2   8  -3   33.67    1.04
   2  -8   3   33.05    1.04
  -2   8   3   33.46    0.96
   2   8  -3   31.88    0.89
  -2   8  -3   32.59    0.92
  -2  -8   3   34.08    1.00
  -2   8  -3   32.64    1.05
   2   8   3   31.10    1.04
   2   8   3   32.93    0.96
  -2   8  -3   33.42    1.04
   2   9  -3   16.34    0.73
   2   9  -3   17.47    0.73
   2  -9   3   17.41    0.74
  -2   9   3   16.01    0.66
  -2   9   3   16.11    0.70
   2   9  -3   17.51    0.71
   2   9  -3   16.75    0.61
  -2   9   3   15.36    0.71
   2   9   3   15.64    0.69
  -2   9  -3   16.95    0.75
  -2   9  -3   16.64    0.61
   2   9   3   15.45    0.70
  -2   9  -3   17.48    0.69
  -2   9  -3   18.53    0.69
  -2  -9   3   16.96    0.68
   2   9   3   16.54    0.66
   2  10  -3    5.91    0.40
   2  10  -3    4.64    0.43
  -2  10   3    5.93    0.48
   2  10  -3    6.96    0.46
  -2  10   3    6.42    0.46
  -2  10   3    5.55    0.44
   2  10  -3    6.16    0.50
   2 -10   3    5.18    0.48
  -2 -10   3    5.28    0.47
  -2  10  -3    5.85    0.46
   2  10   3    5.78    0.45
   2  10   3    6.56    0.49
  -2  10  -3    5.75    0.42
  -2  10  -3    6.74    0.52
   2  10   3    5.35    0.46
  -2  10  -3    5.36    0.46
   2  11  -3   21.11    0.88
   2  11  -3   21.12    0.87
  -2  11   3   20.37    0.86
  -2  11   3   21.11    0.87
  -2  11   3   21.06    0.80
   2  11  -3   20.35    0.85
   2  11  -3   19.87    0.74
  -2  11  -3   19.93    0.88
  -2  11  -3   20.09    0.86
  -2  11  -3   19.09    0.73
   2  11   3   20.84    0.86
  -2 -11   3   21.01    0.81
   2  11   3   21.06    0.80
   2  11   3   21.18    0.85
  -2  11  -3   20.78    0.85
   2  12  -3    1.00    0.35
  -2  12   3    1.28    0.35
  -2  12   3    1.68    0.35
  -2  12   3    1.30    0.34
   2  12  -3    0.73    0.32
   2  12  -3    0.88    0.30
   2  12  -3    1.63    0.35
  -2  12  -3    1.10    0.34
   2  12   3    1.44    0.35
  -2  12  -3    1.41    0.31
  -2 -12   3    0.99    0.34
  -2  12  -3    1.46    0.35
   2  12   3    1.40    0.33
  -2  12  -3    1.36    0.35
   2  12   3    1.69    0.33
   2  13  -3    3.11    0.39
  -2  13   3    3.37    0.45
   2  13  -3    3.57    0.45
  -2  13   3    3.30    0.46
   2  13  -3    2.75    0.43
   2  13  -3    3.49    0.46
  -2  13   3    4.02    0.47
   2  13   3    4.00    0.49
  -2  13  -3    3.70    0.49
  -2  13  -3    3.47    0.42
   2  13   3    3.92    0.47
   2  13   3    3.64    0.46
   2  14  -3   26.38    1.11
   2  14  -3   23.69    0.91
  -2  14   3   24.60    1.09
  -2  14   3   23.80    0.98
  -2  14   3   24.96    1.08
   2  14   3   24.37    1.06
   2  14   3   24.94    1.01
  -2  14  -3   23.76    1.08
  -2  14  -3   23.25    0.92
   2  14   3   24.67    1.08
  -2   0   4  434.03   10.16
  -2   0   4  426.71   10.06
   2   0  -4  402.71    9.89
  -2   0  -4  412.03   10.23
  -2   0   4  418.69    9.98
   2   1  -4   49.59    1.28
   2   1  -4   50.74    1.36
  -2  -1  -4   50.01    1.29
  -2   1   4   51.48    1.29
  -2   1   4   51.26    1.29
  -2  -1  -4   50.40    1.24
  -2   1   4   51.71    1.35
   2  -1  -4   50.60    1.35
   2  -1  -4   50.88    1.29
   2  -1  -4   51.12    1.29
  -2   1  -4   50.47    1.26
  -2  -1   4   50.28    1.21
  -2  -1   4   49.97    1.28
   2   1   4   51.88    1.29
   2   1   4   52.08    1.24
   2  -1  -4   51.81    1.20
  -2   2   4    1.10    0.14
   2   2  -4    0.69    0.16
  -2   2   4    0.73    0.09
   2  -2   4    0.74    0.08
  -2  -2  -4    0.67    0.11
   2  -2   4    0.99    0.13
   2   2  -4    0.71    0.11
  -2  -2  -4    1.02    0.11
  -2   2   4    1.27    0.14
   2   2  -4    0.78    0.13
  -2   2  -4    0.69    0.08
  -2   2  -4    0.88    0.13
   2  -2  -4    0.96    0.13
   2   2   4    0.75    0.11
  -2  -2   4    1.22    0.12
   2   2   4    1.04    0.10
  -2   2  -4    0.81    0.08
  -2  -2   4    1.06    0.12
  -2  -2   4    0.66    0.10
   2  -2  -4    0.82    0.10
   2  -2  -4    0.63    0.15
   2   3  -4   53.11    1.39
   2  -3   4   58.76    1.39
  -2  -3  -4   53.14    1.43
  -2   3   4   59.53    1.39
   2   3  -4   52.74    1.43
  -2   3   4   57.71    1.45
  -2  -3  -4   54.85    1.41
  -2  -3   4   61.04    1.44
   2   3   4   57.65    1.42
  -2   3  -4   52.83    1.42
   2  -3  -4   54.01    1.38
   2  -3  -4   52.94    1.50
  -2  -3   4   58.75    1.39
  -2   3  -4   53.26    1.36
   2   3   4   58.18    1.43
  -2   3  -4   53.28    1.39
  -2  -3   4   60.01    1.41
   2  -4   4   96.62    2.33
  -2   4   4   93.96    2.38
  -2   4   4   95.41    2.31
  -2  -4  -4   93.13    2.38
   2   4  -4   95.97    2.37
   2   4  -4   96.66    2.32
   2   4  -4   92.31    2.32
  -2  -4   4   96.42    2.32
  -2   4  -4   94.61    2.35
  -2  -4   4   97.90    2.37
   2   4   4   98.97    2.39
   2   4   4   93.90    2.36
  -2   4  -4   93.47    2.33
   2  -4  -4   94.75    2.31
   2  -4  -4   93.08    2.45
  -2   4  -4   93.97    2.28
  -2   5   4  147.32    3.57
  -2   5   4  144.47    3.18
   2   5  -4  143.77    3.49
   2   5  -4  141.15    3.54
  -2   5   4  145.34    3.48
   2   5  -4  141.09    3.47
   2  -5   4  147.13    3.51
   2  -5   4  146.51    3.45
   2   5   4  146.67    3.18
   2  -5  -4  140.80    3.65
  -2   5  -4  139.91    3.44
  -2   5  -4  143.38    3.51
  -2  -5   4  151.38    3.55
   2   5   4  144.40    3.54
  -2   5  -4  140.65    3.51
   2   6  -4   40.29    1.14
   2   6  -4   40.04    1.12
  -2   6   4   38.08    1.05
  -2   6   4   39.10    1.12
   2  -6   4   41.57    1.12
  -2   6   4   39.18    1.16
   2  -6   4   39.97    1.14
   2   6  -4   40.18    1.15
  -2   6  -4   40.12    1.12
   2   6   4   39.38    1.15
  -2   6  -4   39.84    1.10
   2  -6  -4   42.38    1.21
   2   6   4   39.60    1.04
  -2  -6   4   39.60    1.11
  -2   6  -4   41.16    1.16
  -2   7   4   22.38    0.77
   2  -7   4   23.10    0.80
   2   7  -4   23.05    0.79
   2   7  -4   21.97    0.77
  -2   7   4   22.29    0.72
   2   7  -4   23.65    0.77
  -2   7   4   22.03    0.78
  -2   7  -4   23.25    0.81
  -2   7  -4   22.09    0.66
  -2  -7   4   21.37    0.75
  -2   7  -4   21.70    0.74
   2   7   4   22.54    0.77
   2   7   4   21.99    0.71
  -2   7  -4   21.25    0.72
  -2   8   4   12.41    0.61
   2   8  -4   11.94    0.60
  -2   8   4   12.20    0.59
   2  -8   4   12.42    0.63
  -2   8   4   12.36    0.56
   2   8  -4   13.08    0.50
   2   8  -4   13.89    0.60
   2   8  -4   13.41    0.60
   2   8   4   13.00    0.56
  -2  -8   4   12.85    0.60
   2   8   4   13.44    0.60
  -2   8  -4   13.45    0.57
  -2   8  -4   13.15    0.56
  -2   8  -4   13.06    0.60
  -2   8  -4   13.54    0.51
   2   9  -4   57.72    1.42
   2   9  -4   60.54    1.65
  -2   9   4   57.31    1.64
  -2   9   4   56.58    1.69
  -2   9   4   55.39    1.50
   2   9  -4   58.42    1.67
   2  -9   4   54.98    1.61
   2   9  -4   57.85    1.66
  -2   9  -4   59.17    1.66
   2   9   4   55.78    1.66
  -2   9  -4   59.21    1.62
   2   9   4   56.74    1.51
  -2   9  -4   57.31    1.45
  -2  -9   4   59.44    1.58
  -2   9  -4   58.53    1.67
   2  10  -4    9.12    0.56
   2  10  -4    8.61    0.56
   2  10  -4    8.93    0.55
  -2  10   4    8.67    0.56
  -2  10   4    8.09    0.52
   2  10  -4    9.35    0.48
  -2  10   4    8.23    0.52
   2 -10   4   10.23    0.60
  -2  10  -4    9.03    0.53
   2  10   4    8.20    0.54
   2  10   4    8.63    0.54
  -2  10  -4    8.26    0.54
  -2  10  -4    7.55    0.46
  -2  10  -4    8.50    0.58
   2  10   4    8.53    0.52
  -2 -10   4    9.12    0.55
   2  11  -4   64.34    1.62
  -2  11   4   62.82    1.72
   2  11  -4   66.78    1.87
   2  11  -4   65.51    1.90
  -2  11   4   63.41    1.87
  -2  11   4   62.47    1.90
   2 -11   4   62.90    1.82
   2  11  -4   61.58    1.86
  -2  11  -4   65.87    1.91
  -2  11  -4   64.29    1.84
  -2  11  -4   62.08    1.63
  -2 -11   4   64.74    1.78
  -2  11  -4   64.69    1.88
   2  11   4   62.18    1.85
   2  11   4   62.16    1.88
   2  11   4   64.83    1.72
   2  12  -4    3.34    0.42
  -2  12   4    2.49    0.40
   2  12  -4    3.00    0.41
   2  12  -4    3.60    0.37
   2  12  -4    2.93    0.42
  -2  12   4    3.05    0.41
  -2  12   4    3.01    0.40
   2  12   4    3.36    0.41
   2  12   4    2.31    0.41
  -2  12  -4    2.90    0.42
  -2  12  -4    3.05    0.37
  -2 -12   4    2.83    0.41
   2  12   4    2.65    0.39
   2  13  -4    6.67    0.56
   2  13  -4    5.98    0.47
  -2  13   4    6.57    0.54
  -2  13   4    6.37    0.55
  -2  13   4    6.25    0.58
   2  13   4    6.53    0.57
  -2  13  -4    6.66    0.61
  -2 -13   4    5.43    0.51
   2  13   4    6.67    0.58
   2  13   4    5.16    0.51
  -2  13  -4    6.88    0.50
  -2   0   5  521.83   11.99
   2   0  -5  512.51   11.89
  -2   0   5  509.70   12.01
  -2   0  -5  483.96   12.26
   2   0  -5  502.26   12.27
   2   1  -5   60.48    1.43
  -2  -1  -5   59.14    1.55
   2   1  -5   58.74    1.62
  -2   1   5   62.91    1.53
  -2  -1  -5   58.53    1.47
  -2   1   5   61.77    1.53
   2   1  -5   58.95    1.52
   2  -1  -5   58.76    1.53
   2   1   5   64.03    1.47
  -2  -1   5   63.71    1.43
  -2   1  -5   59.18    1.50
   2   1   5   63.95    1.55
  -2  -1   5   62.18    1.52
   2  -1  -5   59.19    1.61
  -2   2   5  114.21    2.84
   2   2  -5  116.74    2.74
  -2   2   5  117.58    2.84
  -2  -2  -5  115.25    2.79
   2   2  -5  112.81    2.82
  -2  -2  -5  116.50    2.88
   2  -2   5  118.96    2.76
   2   2  -5  118.62    2.96
  -2   2  -5  115.72    2.76
  -2  -2   5  118.67    2.82
  -2  -2   5  114.61    2.74
   2   2   5  115.15    2.87
  -2   2  -5  115.85    2.79
   2   2   5  114.95    2.79
  -2  -2   5  119.12    2.76
   2  -2  -5  116.26    2.73
   2  -2  -5  116.35    2.94
  -2   3   5   42.75    1.09
  -2  -3  -5   43.28    1.15
   2   3  -5   42.00    1.14
   2   3  -5   44.00    1.11
  -2   3   5   41.91    1.16
  -2   3   5   43.22    1.16
  -2  -3  -5   45.31    1.14
   2   3  -5   44.62    1.25
   2  -3   5   42.98    1.09
  -2  -3   5   43.62    1.10
   2   3   5   41.25    1.13
  -2   3  -5   44.27    1.10
  -2   3  -5   43.34    1.15
  -2   3  -5   44.26    1.07
   2  -3  -5   42.93    1.22
   2  -3  -5   43.28    1.09
  -2  -3   5   43.30    1.12
  -2  -3   5   43.76    1.15
   2   3   5   44.17    1.14
   2  -4   5   22.55    0.64
  -2   4   5   21.64    0.71
   2   4  -5   22.47    0.69
   2   4  -5   22.72    0.67
  -2  -4  -5   22.36    0.67
  -2   4   5   22.71    0.66
   2   4   5   21.69    0.68
   2   4   5   22.92    0.66
  -2  -4   5   22.35    0.70
  -2  -4   5   24.11    0.69
  -2   4  -5   22.21    0.63
  -2  -4   5   23.00    0.67
  -2   4  -5   21.70    0.69
   2  -4  -5   23.35    0.66
  -2   4  -5   22.07    0.65
   2  -4  -5   21.41    0.75
   2   5  -5  148.98    3.63
  -2   5   5  150.04    3.64
   2  -5   5  151.61    3.63
   2   5  -5  150.98    3.71
   2  -5   5  155.86    3.67
  -2   5   5  147.09    3.73
  -2  -5  -5  149.03    3.76
   2   5  -5  154.92    3.65
  -2   5   5  149.74    3.33
   2  -5  -5  149.85    3.84
  -2  -5   5  153.70    3.61
   2   5   5  147.11    3.33
  -2  -5   5  157.41    3.71
  -2   5  -5  149.61    3.67
  -2   5  -5  153.36    3.68
  -2   5  -5  151.09    3.60
   2   5   5  152.13    3.71
   2   6  -5   82.54    2.03
  -2   6   5   80.64    2.01
   2   6  -5   78.82    2.05
   2  -6   5   81.30    2.02
   2   6  -5   77.84    2.01
   2  -6   5   80.32    2.03
  -2   6   5   77.62    1.85
  -2   6   5   77.07    2.07
  -2   6  -5   75.75    2.01
  -2   6  -5   78.40    2.04
   2   6   5   75.21    2.05
  -2  -6   5   79.65    2.01
   2   6   5   77.44    1.85
  -2   6  -5   75.89    1.97
   2  -6  -5   80.11    2.14
  -2   7   5    4.54    0.37
   2   7  -5    4.46    0.38
  -2   7   5    4.17    0.34
  -2   7   5    4.33    0.36
   2  -7   5    4.94    0.36
   2   7  -5    4.95    0.38
   2   7  -5    5.22    0.41
   2  -7   5    4.32    0.41
   2  -7  -5    5.16    0.45
   2   7   5    3.92    0.36
   2   7   5    4.02    0.34
  -2   7  -5    4.18    0.33
  -2   7  -5    4.85    0.42
  -2  -7   5    3.83    0.37
  -2   7  -5    3.87    0.33
  -2   7  -5    4.76    0.35
   2   8  -5   24.28    0.69
   2  -8   5   22.87    0.87
  -2   8   5   23.18    0.79
  -2   8   5   23.54    0.86
   2   8  -5   24.59    0.84
   2   8  -5   23.89    0.85
  -2   8   5   23.88    0.83
   2   8  -5   25.34    0.86
   2   8   5   22.45    0.84
  -2   8  -5   24.03    0.83
  -2   8  -5   23.23    0.72
   2   8   5   23.71    0.80
  -2  -8   5   22.82    0.83
  -2   8  -5   23.46    0.87
  -2   8  -5   24.09    0.81
  -2   9   5    3.19    0.35
  -2   9   5    3.75    0.38
   2   9  -5    3.70    0.38
   2  -9   5    2.93    0.41
   2   9  -5    3.93    0.30
   2   9  -5    3.39    0.37
  -2   9   5    3.31    0.34
   2   9  -5    3.76    0.37
  -2   9  -5    3.70    0.35
   2   9   5    3.55    0.36
  -2   9  -5    3.50    0.38
  -2  -9   5    3.12    0.37
   2   9   5    2.77    0.33
  -2   9  -5    3.72    0.35
  -2   9  -5    3.86    0.31
   2  10  -5   11.35    0.63
   2  10  -5   11.95    0.63
   2 -10   5   11.33    0.66
  -2  10   5   10.42    0.58
  -2  10   5   11.74    0.62
   2  10  -5   11.56    0.61
   2  10  -5   11.58    0.50
  -2  10   5   11.26    0.63
  -2  10  -5   11.97    0.53
  -2  10  -5   11.78    0.60
   2  10   5   10.49    0.57
  -2  10  -5   11.44    0.59
   2  10   5   11.63    0.62
  -2  10  -5   11.80    0.65
  -2 -10   5   11.95    0.62
  -2  11   5    0.31    0.28
  -2  11   5    0.44    0.28
   2  11  -5    0.32    0.25
   2  11  -5    0.41    0.26
   2  11  -5    0.76    0.31
  -2  11   5    0.25    0.27
   2  11  -5    0.36    0.25
   2 -11   5    0.52    0.35
  -2  11  -5    0.49    0.25
   2  11   5    0.69    0.27
   2  11   5    0.44    0.27
  -2 -11   5    0.28    0.32
   2  11   5   -0.03    0.27
  -2  11  -5    0.81    0.33
   2  12  -5    1.31    0.30
   2  12  -5    1.40    0.36
  -2  12   5    1.46    0.35
  -2  12   5    1.42    0.35
   2 -12   5    0.74    0.38
  -2  12   5    1.16    0.32
   2  12   5    1.95    0.37
   2  12   5    1.25    0.34
  -2 -12   5    1.44    0.40
  -2  12  -5    1.38    0.29
   2  12   5    1.19    0.34
  -2  12  -5    1.73    0.38
  -2  13   5    2.88    0.43
  -2  13   5    2.51    0.42
   2  13  -5    2.46    0.42
  -2  13   5    3.04    0.41
   2  13  -5    2.16    0.34
   2  13   5    2.38    0.41
   2  13   5    2.41    0.42
  -2  13  -5    2.50    0.44
  -2 -13   5    1.85    0.45
  -2  13  -5    2.57    0.36
   2  13   5    2.37    0.41
  -2   0   6  142.83    3.32
  -2   0   6  142.42    3.32
   2   0  -6  133.06    3.31
  -2   0  -6  134.52    3.42
   2   0  -6  134.37    3.47
  -2   1   6   56.51    1.45
  -2  -1  -6   58.26    1.49
  -2  -1  -6   58.69    1.39
  -2   1   6   56.53    1.46
   2   1  -6   57.28    1.45
   2   1  -6   57.82    1.55
  -2   1  -6   56.42    1.51
  -2   1  -6   56.93    1.42
   2   1   6   56.84    1.39
  -2  -1   6   56.01    1.45
   2  -1  -6   59.63    1.55
   2   1   6   56.20    1.39
  -2  -1   6   55.26    1.44
  -2   2   6   60.22    1.59
   2   2  -6   62.80    1.50
   2  -2   6   60.81    1.50
  -2  -2  -6   62.35    1.61
  -2   2   6   61.13    1.59
   2  -2   6   59.06    1.58
   2   2  -6   60.97    1.69
   2   2  -6   62.89    1.58
  -2  -2   6   62.20    1.54
  -2   2  -6   64.79    1.56
  -2   2  -6   64.06    1.50
   2   2   6   63.37    1.60
   2   2   6   62.33    1.54
   2  -2  -6   64.77    1.49
   2  -2  -6   63.48    1.68
  -2  -2   6   61.67    1.50
  -2  -2   6   63.07    1.57
   2  -3   6   95.87    2.34
  -2   3   6   96.85    2.42
   2  -3   6   94.33    2.39
   2   3  -6   96.00    2.33
   2   3  -6   98.91    2.41
   2   3  -6   97.18    2.55
  -2  -3  -6   96.23    2.45
  -2   3   6   97.43    2.43
   2   3   6   98.30    2.44
   2   3   6   96.19    2.39
   2  -3  -6   95.10    2.52
   2  -3  -6   97.78    2.32
  -2  -3   6   98.35    2.40
  -2   3  -6   97.76    2.34
  -2  -3   6   97.49    2.39
  -2   3  -6   98.20    2.38
  -2  -3   6   97.06    2.33
  -2  -3   6   99.67    2.35
  -2   4   6   14.59    0.52
  -2  -4  -6   12.59    0.48
  -2   4   6   13.16    0.46
   2  -4   6   13.92    0.43
  -2   4   6   12.88    0.50
   2   4  -6   12.59    0.46
   2   4  -6   12.91    0.48
   2   4  -6   12.50    0.57
  -2  -4   6   13.25    0.53
  -2   4  -6   13.02    0.42
   2   4   6   14.23    0.47
   2  -4  -6   12.54    0.55
  -2  -4   6   13.50    0.49
   2   4   6   12.86    0.47
   2  -4  -6   12.36    0.44
  -2   4  -6   12.36    0.49
  -2  -4   6   13.22    0.47
  -2   4  -6   12.51    0.43
  -2   5   6   97.82    2.25
  -2   5   6   98.60    2.44
   2  -5   6  102.83    2.46
   2   5  -6   97.93    2.45
   2  -5   6  100.11    2.48
  -2  -5  -6  100.69    2.54
   2   5  -6   98.75    2.50
  -2   5   6   94.25    2.52
  -2   5  -6   99.98    2.41
   2  -5  -6  100.68    2.61
  -2   5  -6   98.96    2.46
  -2  -5   6  102.53    2.50
   2   5   6   95.26    2.50
  -2   5  -6   99.48    2.49
  -2  -5   6  100.60    2.47
   2   5   6   96.17    2.26
  -2  -6  -6   16.71    0.62
  -2   6   6   16.91    0.65
   2   6  -6   16.61    0.62
   2  -6   6   16.77    0.69
  -2   6   6   16.85    0.59
   2  -6   6   17.90    0.60
   2   6  -6   16.54    0.62
  -2   6   6   16.92    0.59
   2   6   6   16.07    0.62
   2  -6  -6   16.26    0.69
  -2   6  -6   16.03    0.59
  -2   6  -6   16.74    0.65
  -2  -6   6   16.16    0.65
  -2   6  -6   16.52    0.58
   2   6   6   16.65    0.59
  -2   7   6   23.52    0.78
   2   7  -6   23.77    0.80
   2  -7   6   22.84    0.86
  -2   7   6   23.78    0.80
  -2   7   6   22.68    0.82
   2   7  -6   23.54    0.81
   2   7  -6   24.13    0.81
   2   7   6   21.08    0.80
  -2  -7   6   24.39    0.85
  -2   7  -6   23.56    0.78
   2   7   6   23.07    0.76
  -2   7  -6   23.40    0.84
   2  -7  -6   24.26    0.88
  -2   7  -6   23.48    0.68
  -2   7  -6   23.76    0.76
   2  -8   6    6.02    0.51
   2   8  -6    6.37    0.44
  -2   8   6    6.16    0.43
   2   8  -6    6.87    0.45
  -2   8   6    6.37    0.42
  -2   8   6    5.97    0.44
   2   8  -6    7.53    0.47
   2   8  -6    6.80    0.34
   2  -8  -6    6.34    0.50
  -2   8  -6    7.11    0.46
  -2  -8   6    5.91    0.45
   2   8   6    7.00    0.44
  -2   8  -6    6.29    0.40
   2   8   6    6.16    0.41
  -2   8  -6    6.51    0.36
  -2   8  -6    6.81    0.41
  -2   9   6   30.47    1.06
   2   9  -6   31.60    1.05
   2   9  -6   31.60    0.86
   2   9  -6   32.79    1.04
  -2   9   6   30.47    1.02
   2  -9   6   32.20    1.10
  -2   9   6   31.90    0.98
   2   9  -6   31.74    1.05
  -2  -9   6   30.37    1.02
  -2   9  -6   30.90    1.05
   2   9   6   29.45    1.05
   2   9   6   32.25    1.00
  -2   9  -6   31.19    0.88
  -2  10   6    8.02    0.52
  -2  10   6    8.68    0.57
   2  10  -6    9.05    0.57
  -2  10   6    8.96    0.54
   2  10  -6    9.16    0.56
   2 -10   6    7.76    0.60
   2  10  -6    8.35    0.56
   2  10   6    9.11    0.54
  -2  10  -6    8.42    0.46
   2  10   6    8.03    0.54
  -2 -10   6    8.74    0.58
  -2  10  -6    8.46    0.58
   2 -11   6   59.66    1.76
  -2  11   6   61.17    1.83
   2  11  -6   59.49    1.78
  -2  11   6   55.43    1.74
  -2  11   6   61.59    1.66
  -2  11  -6   57.85    1.79
  -2 -11   6   60.14    1.72
  -2  11  -6   58.63    1.52
   2  11   6   57.70    1.80
   2  11   6   60.86    1.65
   2  11   6   60.72    1.78
   2  12  -6    2.89    0.42
   2 -12   6    3.58    0.51
  -2  12   6    3.40    0.43
  -2  12   6    2.77    0.40
  -2  12   6    3.86    0.46
   2  12   6    3.70    0.44
  -2  12  -6    2.32    0.35
   2  12   6    3.17    0.44
  -2  12  -6    2.90    0.43
  -2 -12   6    4.02    0.46
   2  12   6    2.64    0.42
  -2  13   6    3.33    0.46
  -2  13   6    3.70    0.48
   2  13  -6    4.41    0.51
   2 -13   6    3.53    0.54
  -2  13  -6    3.23    0.48
   2  13   6    3.18    0.46
   2  13   6    4.12    0.50
   2  13   6    4.07    0.48
  -2  13  -6    3.69    0.41
  -2 -13   6    3.49    0.49
  -2   0  -7  250.58    6.30
  -2   0   7  256.86    6.12
  -2   0   7  257.81    6.11
   2   0  -7  261.37    6.36
  -2   0   7  252.38    5.98
   2   0  -7  263.02    6.12
  -2  -1  -7   27.01    0.80
  -2   1   7   28.79    0.78
   2   1  -7   28.14    0.88
   2  -1   7   27.14    0.81
  -2   1   7   26.55    0.82
  -2   1   7   27.70    0.77
   2   1  -7   26.23    0.76
  -2  -1   7   26.10    0.76
  -2   1  -7   26.95    0.75
  -2   1  -7   27.56    0.83
   2  -1  -7   25.82    0.86
   2   1   7   27.79    0.70
  -2  -1   7   27.19    0.76
   2   1   7   27.37    0.70
  -2  -1   7   26.38    0.82
   2  -2   7   51.88    1.24
  -2   2   7   48.60    1.34
   2   2  -7   52.10    1.33
  -2  -2  -7   49.59    1.36
   2   2  -7   51.37    1.45
  -2   2   7   52.98    1.35
  -2   2   7   49.95    1.35
   2   2  -7   50.92    1.24
   2  -2   7   49.35    1.36
   2  -2   7   52.09    1.23
  -2  -2   7   52.51    1.24
   2  -2  -7   51.60    1.23
   2   2   7   51.73    1.29
  -2  -2   7   51.95    1.32
   2   2   7   51.41    1.29
  -2   2  -7   50.35    1.31
  -2   2  -7   49.90    1.42
  -2  -2   7   52.16    1.29
   2  -2  -7   51.04    1.43
  -2   2  -7   50.70    1.23
   2  -3   7   40.19    1.00
   2  -3   7   37.41    1.12
  -2   3   7   39.77    1.10
   2   3  -7   39.47    1.07
   2   3  -7   41.80    1.02
  -2   3   7   38.22    1.10
  -2   3   7   38.46    1.10
   2   3  -7   40.09    1.21
  -2  -3  -7   40.72    1.10
   2  -3  -7   40.69    1.18
  -2   3  -7   40.19    1.08
  -2  -3   7   40.00    1.13
  -2  -3   7   39.17    1.05
   2   3   7   38.13    1.05
   2  -3  -7   40.84    1.01
  -2  -3   7   38.74    1.07
  -2   3  -7   40.34    1.00
  -2  -3   7   38.82    1.02
   2   4  -7   34.78    0.94
   2   4  -7   32.79    1.09
  -2   4   7   33.26    0.88
  -2   4   7   32.53    0.99
  -2   4   7   32.84    0.98
   2  -4   7   34.33    0.91
  -2   4   7   34.22    1.00
   2   4  -7   33.89    0.97
  -2  -4  -7   34.35    0.98
  -2  -4   7   32.35    1.01
   2  -4  -7   35.12    1.07
  -2   4  -7   34.08    0.91
   2   4   7   33.41    0.95
  -2   4  -7   33.25    0.97
  -2  -4   7   35.06    0.95
   2   4   7   32.94    0.89
  -2  -4   7   35.31    0.97
   2  -4  -7   35.39    0.92
  -2   5   7   23.16    0.70
   2   5  -7   23.30    0.76
  -2   5   7   23.82    0.79
   2   5  -7   22.54    0.73
   2   5  -7   24.16    0.88
  -2  -5  -7   23.02    0.75
   2  -5   7   24.86    0.71
  -2  -5   7   23.95    0.75
  -2  -5   7   22.00    0.81
  -2   5  -7   22.48    0.76
   2   5   7   22.76    0.75
  -2   5  -7   22.88    0.70
  -2   5  -7   22.09    0.68
   2  -5  -7   24.85    0.85
   2   5   7   21.70    0.70
  -2  -5   7   24.54    0.73
   2   6  -7   59.31    1.54
  -2   6   7   57.84    1.43
   2  -6   7   58.47    1.51
   2   6  -7   57.34    1.56
  -2  -6  -7   55.55    1.56
  -2   6   7   54.31    1.59
   2  -6   7   56.48    1.59
  -2   6  -7   55.31    1.48
  -2   6  -7   54.77    1.51
  -2  -6   7   58.53    1.58
   2   6   7   56.94    1.57
   2   6   7   57.63    1.44
  -2   6  -7   57.70    1.57
  -2  -6   7   60.53    1.57
   2  -6  -7   55.20    1.65
   2   7  -7   14.22    0.61
   2   7  -7   13.62    0.58
  -2   7   7   12.09    0.58
   2  -7   7   12.07    0.64
  -2   7   7   13.03    0.57
   2   7   7   12.53    0.56
   2  -7  -7   13.65    0.66
  -2   7  -7   12.64    0.54
  -2   7  -7   12.97    0.53
  -2  -7   7   13.22    0.62
  -2   7  -7   12.15    0.60
   2   7   7   12.33    0.57
  -2   8   7   31.98    1.10
  -2   8   7   33.94    1.02
   2  -8   7   33.93    1.12
   2   8  -7   34.96    1.09
   2   8  -7   36.78    1.10
  -2   8  -7   32.76    1.09
   2  -8  -7   34.62    1.14
  -2  -8   7   32.50    1.09
   2   8   7   33.15    1.01
   2   8   7   33.35    1.09
   2  -9   7    7.15    0.59
  -2   9   7    6.04    0.46
   2   9  -7    6.43    0.47
  -2   9   7    7.47    0.50
   2   9   7    6.88    0.47
   2   9   7    6.33    0.49
  -2   9  -7    6.13    0.49
  -2  -9   7    7.69    0.55
   2  10  -7   11.05    0.61
  -2  10   7    9.65    0.58
  -2  10   7    8.93    0.56
   2 -10   7    9.46    0.64
  -2 -10   7    9.50    0.62
   2  10   7    9.92    0.58
  -2  10  -7    9.53    0.61
   2  10   7    9.42    0.56
   2 -11   7    7.45    0.61
   2  11  -7    6.32    0.52
  -2  11   7    6.88    0.54
  -2  11   7    6.73    0.51
   2  11   7    6.53    0.52
   2  11   7    5.41    0.49
  -2  11  -7    6.37    0.54
   2  11   7    6.25    0.50
  -2 -11   7    6.36    0.56
  -2  12   7    2.66    0.42
   2  12  -7    3.58    0.46
  -2  12   7    3.06    0.44
   2 -12   7    3.48    0.53
   2  12   7    3.26    0.44
   2  12   7    4.15    0.45
   2  12   7    2.99    0.43
  -2 -12   7    3.67    0.48
  -2  12  -7    3.85    0.48
  -2   0   8   59.13    1.59
  -2   0  -8   57.64    1.62
  -2   0   8   62.52    1.55
  -2   0   8   62.91    1.54
   2   0  -8   60.16    1.68
   2   0  -8   61.54    1.55
   2   0   8   59.91    1.57
  -2   0  -8   58.06    1.50
   2   1  -8   17.29    0.67
  -2  -1  -8   17.63    0.60
  -2   1   8   16.49    0.54
   2  -1   8   16.55    0.61
  -2   1   8   14.80    0.60
   2   1  -8   17.62    0.55
  -2   1   8   16.59    0.55
   2  -1  -8   17.49    0.66
  -2  -1   8   15.49    0.61
  -2   1  -8   17.02    0.53
  -2  -1   8   16.35    0.54
  -2   1  -8   17.28    0.61
   2   1   8   16.44    0.46
  -2  -1   8   16.29    0.53
   2   1   8   16.51    0.46
   2   1   8   15.96    0.59
   2   2  -8   13.03    0.38
   2   2  -8   13.23    0.57
  -2  -2  -8   12.62    0.50
  -2   2   8   13.26    0.48
   2   2  -8   13.44    0.47
  -2   2   8   13.17    0.53
   2  -2   8   12.55    0.55
  -2   2   8   12.93    0.48
  -2  -2   8   13.12    0.46
   2   2   8   12.49    0.50
  -2   2  -8   13.46    0.55
   2   2   8   12.66    0.41
  -2  -2   8   13.10    0.44
  -2   2  -8   13.53    0.47
   2   2   8   12.62    0.41
   2  -2  -8   13.25    0.58
  -2  -2   8   12.45    0.46
  -2   3   8   54.26    1.49
   2  -3   8   55.12    1.37
   2   3  -8   55.63    1.61
  -2   3   8   56.79    1.49
  -2   3   8   52.90    1.48
   2   3  -8   57.07    1.39
   2  -3   8   54.53    1.52
  -2  -3  -8   57.23    1.51
   2   3  -8   55.01    1.45
   2   3   8   55.28    1.33
  -2   3  -8   54.23    1.37
  -2  -3   8   56.36    1.42
   2  -3  -8   56.72    1.37
   2   3   8   57.20    1.44
  -2  -3   8   56.20    1.45
  -2   3  -8   57.71    1.59
   2  -3  -8   57.86    1.59
   2   3   8   53.16    1.43
   2   3   8   53.65    1.44
  -2  -3   8   55.59    1.38
  -2   3  -8   57.49    1.45
   2   4  -8    7.71    0.51
   2   4  -8    6.46    0.34
   2  -4   8    7.00    0.30
  -2   4   8    6.87    0.41
  -2   4   8    7.46    0.39
  -2   4   8    6.79    0.38
  -2  -4  -8    7.10    0.40
  -2   4   8    6.97    0.35
   2   4  -8    7.15    0.37
  -2   4  -8    6.68    0.30
   2  -4  -8    7.07    0.34
  -2  -4   8    7.43    0.36
   2   4   8    6.83    0.34
  -2   4  -8    6.53    0.37
  -2  -4   8    6.68    0.46
   2  -4  -8    7.10    0.48
  -2  -4   8    6.86    0.36
   2   4   8    6.37    0.36
   2   5  -8   70.52    1.87
   2  -5   8   72.98    1.81
   2   5  -8   72.45    1.82
  -2   5   8   74.02    1.86
  -2   5   8   69.43    1.90
   2   5  -8   69.80    2.03
  -2  -5  -8   71.85    1.91
  -2   5   8   69.79    1.70
  -2   5  -8   69.07    1.80
   2   5   8   68.91    1.70
   2  -5  -8   70.82    1.99
  -2   5  -8   74.52    1.88
   2   5   8   68.88    1.86
  -2  -5   8   71.39    1.92
  -2  -5   8   74.55    1.87
  -2  -6  -8   39.42    1.16
   2   6  -8   38.80    1.16
  -2   6   8   37.94    1.19
   2   6  -8   38.87    1.30
  -2   6   8   40.92    1.16
  -2   6   8   38.47    1.07
   2   6  -8   39.40    1.13
   2  -6   8   38.62    1.22
   2   6   8   37.87    1.16
  -2   6  -8   41.16    1.17
  -2  -6   8   39.05    1.22
   2  -6  -8   39.71    1.25
   2   6   8   40.09    1.07
   2   7  -8    1.54    0.25
  -2   7   8    1.11    0.25
  -2   7   8    1.23    0.26
  -2  -7  -8    1.74    0.28
   2  -7   8    1.05    0.34
   2   7  -8    1.22    0.27
   2   7   8    0.80    0.23
   2   7   8    1.23    0.27
   2  -7  -8    1.19    0.31
  -2   7  -8    0.99    0.27
  -2  -7   8    1.45    0.31
  -2   8   8    7.13    0.47
   2  -8   8    6.90    0.55
  -2   8   8    6.92    0.47
   2   8  -8    7.44    0.46
   2  -8  -8    8.10    0.54
  -2   8  -8    7.99    0.50
   2   8   8    7.51    0.45
  -2  -8   8    7.13    0.51
   2   8   8    8.01    0.47
   2   9  -8   41.51    1.28
  -2   9   8   39.82    1.32
  -2   9   8   41.21    1.20
   2  -9   8   40.33    1.35
  -2  -9   8   41.46    1.31
   2   9   8   39.30    1.30
  -2   9  -8   42.88    1.31
   2  -9  -8   41.51    1.35
   2   9   8   42.04    1.22
  -2  10   8    2.14    0.37
   2  10  -8    2.21    0.36
   2 -10   8    2.32    0.45
  -2  10   8    2.30    0.38
  -2 -10   8    2.08    0.40
   2  10   8    1.97    0.35
   2  10   8    2.27    0.36
  -2  10  -8    1.60    0.36
  -2  11   8   63.02    1.71
   2 -11   8   62.20    1.85
  -2  11   8   62.25    1.89
   2  11  -8   58.72    1.81
  -2  11  -8   59.25    1.83
  -2 -11   8   59.66    1.81
   2  11   8   63.40    1.84
   2  11   8   62.48    1.71
   2  11   8   59.25    1.85
  -2  12   8    3.97    0.48
   2 -12   8    3.90    0.55
   2  12  -8    4.07    0.48
  -2  12   8    4.96    0.52
   2  12   8    4.17    0.48
  -2  12  -8    3.92    0.49
   2  12   8    4.56    0.50
   2  12   8    3.67    0.47
  -2 -12   8    4.61    0.54
  -2   0   9  201.65    4.95
  -2   0  -9  205.45    4.91
  -2   0   9  219.60    5.01
   2   0   9  206.71    4.93
   2   0  -9  208.78    5.26
  -2   0   9  204.36    5.01
  -2   0  -9  210.64    5.20
   2   0  -9  210.19    5.01
   2  -1   9   78.13    1.99
  -2  -1  -9   76.94    2.04
  -2   1   9   75.11    1.98
   2   1  -9   74.37    1.93
  -2   1   9   80.33    1.95
  -2   1   9   77.33    1.95
   2   1  -9   75.62    2.10
  -2  -1   9   75.30    2.00
   2   1   9   75.33    1.95
   2   1   9   78.23    1.85
  -2   1  -9   75.41    1.89
  -2  -1   9   74.94    1.93
  -2  -1   9   79.34    1.93
  -2   1  -9   75.33    2.06
   2   1   9   77.16    1.85
   2  -1  -9   77.15    2.11
   2   2  -9   34.81    1.16
   2   2  -9   37.05    0.90
   2  -2   9   35.44    1.10
  -2  -2  -9   37.03    1.09
  -2   2   9   37.42    1.04
  -2   2   9   36.65    1.04
   2   2  -9   35.67    1.01
  -2   2   9   37.35    1.10
   2   2   9   35.91    1.06
  -2   2  -9   35.66    1.00
  -2   2  -9   37.02    1.13
  -2  -2   9   38.61    1.02
   2   2   9   37.51    0.96
   2   2   9   37.91    0.97
  -2  -2   9   37.31    0.98
  -2  -2   9   34.74    1.01
   2  -2  -9   37.03    1.16
   2   3  -9    4.26    0.40
   2   3  -9    3.98    0.30
   2  -3   9    4.57    0.20
   2   3  -9    4.80    0.26
  -2   3   9    4.07    0.37
  -2   3   9    4.14    0.33
  -2   3   9    3.98    0.32
  -2  -3  -9    4.78    0.40
   2  -3   9    3.89    0.39
   2  -3   9    4.46    0.20
  -2   3  -9    4.36    0.32
   2   3   9    3.86    0.33
  -2   3  -9    5.25    0.42
  -2   3  -9    4.33    0.21
  -2  -3   9    4.33    0.30
   2  -3  -9    4.73    0.23
   2   3   9    4.37    0.27
   2  -3  -9    4.97    0.44
   2   3   9    4.12    0.26
  -2  -3   9    3.97    0.31
  -2   4   9   13.91    0.59
  -2   4   9   13.61    0.56
   2  -4   9   14.15    0.44
   2   4  -9   13.39    0.52
  -2  -4  -9   13.11    0.57
   2  -4   9   13.87    0.65
   2   4  -9   14.12    0.49
   2   4  -9   13.05    0.65
  -2   4   9   13.85    0.50
   2   4   9   13.82    0.51
  -2   4  -9   14.11    0.66
  -2   4  -9   14.61    0.55
   2   4   9   13.78    0.54
   2   4   9   13.06    0.50
  -2  -4   9   12.84    0.63
   2  -4  -9   13.41    0.65
   2  -5   9   28.24    1.00
  -2   5   9   28.01    0.94
   2   5  -9   31.16    0.89
  -2   5   9   28.84    0.94
  -2   5   9   30.68    0.85
  -2  -5  -9   29.86    0.95
   2   5  -9   27.34    1.06
   2   5   9   30.57    0.87
   2  -5  -9   30.14    1.05
   2   5   9   29.76    0.91
  -2   5  -9   30.52    0.93
   2   5   9   30.83    0.89
  -2  -5   9   29.68    1.00
  -2   6   9   45.97    1.30
   2   6  -9   42.04    1.45
   2  -6   9   45.45    1.37
  -2  -6  -9   46.66    1.33
  -2   6   9   45.65    1.20
  -2   6   9   44.69    1.34
   2   6  -9   47.10    1.28
  -2  -6   9   43.98    1.36
  -2   6  -9   48.04    1.32
   2  -6  -9   44.39    1.40
   2   6   9   44.72    1.30
   2   6   9   46.08    1.21
   2   6   9   44.32    1.23
   2  -7   9    0.35    0.30
  -2   7   9    0.45    0.23
  -2   7   9    0.26    0.21
   2   7  -9    0.01    0.26
  -2   7   9   -0.28    0.23
   2   7  -9    0.42    0.23
  -2  -7  -9    0.55    0.25
  -2   7  -9    0.37    0.24
   2   7   9    0.13    0.23
  -2  -7   9   -0.13    0.27
   2  -7  -9    0.22    0.28
   2   7   9    0.37    0.21
  -2   8   9   35.61    1.12
  -2   8   9   37.12    1.09
   2   8  -9   40.07    1.16
  -2   8   9   34.77    1.18
   2   8  -9   36.87    1.31
   2  -8   9   36.09    1.23
  -2   8  -9   36.40    1.16
  -2  -8   9   35.26    1.19
   2   8   9   36.29    1.08
   2   8   9   34.91    1.15
   2  -8  -9   36.85    1.23
  -2   9   9   14.90    0.71
   2  -9   9   14.22    0.75
   2   9  -9   14.66    0.77
  -2   9   9   14.27    0.65
  -2   9   9   15.22    0.66
   2   9  -9   15.01    0.66
  -2  -9   9   14.17    0.74
   2   9   9   13.39    0.64
  -2   9  -9   14.58    0.69
   2   9   9   13.91    0.67
   2  -9  -9   14.14    0.71
  -2  10   9    6.93    0.53
   2 -10   9    7.38    0.65
   2  10  -9    6.99    0.51
  -2  10   9    7.73    0.55
   2  10   9    6.17    0.50
   2  10   9    6.71    0.51
  -2 -10   9    6.67    0.57
  -2  10  -9    5.88    0.52
  -2  11   9    1.88    0.37
   2 -11   9    1.94    0.49
   2  11  -9    2.46    0.39
  -2  11   9    1.94    0.37
  -2  11  -9    2.49    0.40
   2  11   9    1.91    0.35
  -2 -11   9    2.04    0.46
   2  11   9    2.03    0.36
   2  11   9    2.41    0.40
  -2   0  10   74.87    1.91
  -2   0 -10   76.44    2.04
   2   0  10   74.74    1.96
  -2   0 -10   72.33    1.85
  -2   0  10   74.10    1.99
   2   0 -10   75.02    2.09
  -2   0  10   76.51    1.90
  -2   1  10    9.02    0.40
   2   1 -10    9.20    0.56
   2  -1  10    7.64    0.52
  -2   1  10    7.64    0.53
   2   1 -10    8.08    0.39
  -2  -1 -10    8.44    0.49
  -2  -1 -10    7.71    0.37
  -2   1 -10    8.26    0.49
   2  -1 -10    8.29    0.54
   2   1  10    8.69    0.29
  -2  -1  10    9.12    0.40
   2   1  10    9.20    0.29
  -2   1 -10    8.25    0.38
  -2  -1  10    8.27    0.50
  -2  -1  10    8.31    0.39
   2   1  10    8.78    0.48
  -2  -2 -10   14.76    0.60
   2   2 -10   13.55    0.67
  -2   2  10   12.69    0.61
  -2   2  10   13.93    0.53
   2  -2  10   12.51    0.62
   2   2  10   13.45    0.44
   2   2  10   13.54    0.44
  -2   2 -10   13.93    0.62
  -2  -2  10   12.95    0.62
   2  -2 -10   14.14    0.66
   2   2  10   12.98    0.58
  -2  -2  10   13.36    0.49
  -2   2 -10   14.44    0.50
  -2   3  10   69.21    1.85
   2  -3  10   67.12    1.89
   2   3 -10   69.70    2.02
  -2   3  10   68.71    1.87
   2   3 -10   72.42    1.71
  -2  -3 -10   75.55    1.92
  -2   3  10   70.57    1.63
  -2   3 -10   72.48    1.80
   2   3  10   69.18    1.78
   2  -3 -10   72.33    1.99
  -2   3 -10   72.03    1.99
   2   3  10   68.68    1.82
  -2  -3  10   65.21    1.89
  -2  -3  10   68.81    1.80
  -2   4  10   13.03    0.49
  -2   4  10   12.27    0.58
  -2   4  10   12.06    0.53
  -2  -4 -10   13.94    0.58
   2  -4  10   12.91    0.66
   2   4 -10   13.02    0.46
   2   4 -10   12.82    0.67
  -2   4 -10   13.37    0.54
   2   4  10   13.60    0.49
   2   4  10   12.51    0.55
   2   4  10   12.60    0.50
  -2   4 -10   12.61    0.64
   2  -4 -10   13.16    0.66
  -2  -4  10   12.57    0.63
   2   5 -10   81.42    2.10
   2   5 -10   81.69    2.39
   2  -5  10   82.41    2.25
  -2  -5 -10   87.09    2.25
  -2   5  10   80.39    2.18
  -2   5  10   84.51    1.98
  -2   5  10   84.21    2.23
  -2  -5  10   81.04    2.24
   2   5  10   86.92    2.18
   2   5  10   86.61    2.00
   2   5  10   88.39    2.14
  -2   5 -10   84.37    2.16
   2  -5 -10   84.89    2.33
  -2   5 -10   82.66    2.36
   2   6 -10    8.08    0.59
  -2   6  10    7.50    0.43
  -2  -6 -10    8.31    0.48
  -2   6  10    7.91    0.46
   2   6 -10    8.69    0.44
  -2   6  10    7.85    0.49
   2  -6  10    8.35    0.55
   2   6  10    7.59    0.44
  -2  -6  10    8.34    0.58
   2   6  10    8.17    0.45
   2  -6 -10    7.48    0.54
  -2   6 -10    8.72    0.48
   2   6  10    8.42    0.44
  -2   7  10   11.17    0.52
   2   7 -10   10.61    0.51
   2  -7  10   10.25    0.63
   2   7 -10    9.81    0.65
  -2  -7 -10   10.56    0.55
  -2   7  10   10.67    0.55
  -2   7  10    9.86    0.54
   2   7  10   10.62    0.52
   2   7  10   10.02    0.52
   2  -7 -10   10.53    0.61
  -2  -7  10    9.98    0.61
  -2   7 -10   10.16    0.55
  -2   8  10   11.64    0.55
   2  -8  10   10.97    0.67
   2   8 -10    9.96    0.65
  -2   8  10   10.47    0.57
   2   8 -10   11.05    0.56
  -2   8  10   11.92    0.60
  -2   8 -10   12.12    0.59
  -2  -8  10   10.21    0.66
   2   8  10   11.61    0.56
   2   8  10   10.92    0.56
   2  -8 -10   12.10    0.66
   2   9 -10   17.77    0.73
  -2   9  10   17.04    0.72
  -2   9  10   18.33    0.74
   2  -9  10   18.07    0.86
  -2   9  10   18.40    0.80
   2   9 -10   15.88    0.84
   2   9  10   18.27    0.78
  -2  -9  10   17.73    0.83
   2  -9 -10   17.34    0.80
   2   9  10   19.19    0.74
  -2   9 -10   18.79    0.80
   2  10 -10    5.71    0.48
   2  10 -10    5.21    0.57
  -2  10  10    5.66    0.50
  -2  10  10    5.69    0.48
   2 -10  10    5.94    0.60
  -2  10 -10    6.45    0.55
   2  10  10    6.00    0.48
  -2 -10  10    5.31    0.55
   2  10  10    5.34    0.48
   2  10  10    5.79    0.49
  -2  11  10   34.33    1.14
   2  11 -10   32.05    1.32
  -2  11  10   33.16    1.24
   2 -11  10   33.28    1.28
   2  11  10   32.93    1.13
  -2 -11  10   33.13    1.27
  -2  11 -10   33.62    1.21
   2  11  10   33.87    1.22
   2  11  10   35.48    1.21
   2   0  11  116.07    2.94
  -2   0  11  114.75    2.96
  -2   0 -11  116.51    3.06
   2   0 -11  118.48    3.13
  -2   0  11  118.66    2.90
  -2   0 -11  116.76    2.81
   2   1 -11   20.21    0.81
  -2  -1 -11   21.20    0.75
  -2  -1 -11   20.14    0.61
  -2   1  11   20.35    0.66
   2  -1  11   20.50    0.77
  -2   1  11   19.08    0.76
  -2   1 -11   20.31    0.77
   2  -1 -11   20.35    0.79
  -2  -1  11   19.83    0.78
  -2   1 -11   19.61    0.62
  -2  -1  11   18.72    0.63
   2   1  11   20.58    0.76
  -2  -2 -11   57.44    1.57
   2   2 -11   53.61    1.64
  -2   2  11   51.68    1.53
   2  -2  11   53.38    1.56
  -2   2  11   56.56    1.48
   2  -2 -11   54.84    1.62
  -2   2 -11   52.80    1.40
   2   2  11   56.55    1.37
   2   2  11   53.43    1.51
  -2   2 -11   54.33    1.60
  -2  -2  11   53.57    1.57
  -2  -2  11   54.29    1.44
   2   3 -11   29.93    1.08
  -2   3  11   30.85    0.94
   2  -3  11   29.71    1.05
  -2  -3 -11   31.36    1.00
  -2   3  11   31.06    1.02
  -2  -3  11   28.98    1.04
  -2   3 -11   31.28    1.06
  -2  -3  11   31.99    0.90
   2   3  11   30.42    0.97
   2   3  11   32.35    0.87
  -2   3 -11   31.46    0.90
   2  -3 -11   31.87    1.08
  -2   4  11    9.41    0.42
   2  -4  11    9.19    0.60
   2   4 -11    8.62    0.59
  -2   4  11    9.43    0.53
  -2  -4 -11   10.50    0.52
  -2   4  11    9.97    0.49
  -2   4 -11   10.28    0.46
   2   4  11    9.81    0.49
   2  -4 -11    9.63    0.58
   2   4  11   10.17    0.42
  -2  -4  11    9.71    0.42
  -2  -4  11    9.56    0.57
  -2   4 -11   10.03    0.58
  -2   5  11   23.84    0.73
  -2   5  11   23.08    0.81
  -2  -5 -11   23.90    0.84
   2   5 -11   21.53    0.94
  -2   5  11   23.41    0.85
   2  -5  11   22.87    0.91
  -2   5 -11   23.83    0.79
  -2  -5  11   21.84    0.89
   2   5  11   22.97    0.75
   2   5  11   23.37    0.80
  -2   5 -11   22.62    0.93
   2  -5 -11   23.48    0.92
   2   5  11   22.33    0.75
  -2   6  11   28.13    0.99
  -2   6  11   30.83    0.90
  -2   6  11   29.02    0.99
   2   6 -11   29.15    1.12
   2  -6  11   27.27    1.05
  -2   6 -11   29.35    1.11
   2   6  11   31.18    0.96
   2   6  11   29.02    0.90
   2  -6 -11   30.27    1.07
  -2  -6  11   28.99    1.07
  -2   6 -11   30.31    0.96
   2   7 -11   10.22    0.67
  -2   7  11   12.75    0.62
   2  -7  11   11.28    0.67
  -2   7  11   11.05    0.54
  -2   7  11   11.77    0.60
  -2  -7  11   12.30    0.69
  -2   7 -11   10.44    0.68
  -2   7 -11   11.74    0.58
   2   7  11   11.85    0.56
   2  -7 -11   13.40    0.70
   2   7  11   12.44    0.56
  -2   8  11   23.40    0.88
  -2   8  11   24.31    0.92
   2  -8  11   23.60    1.01
  -2   8  11   23.20    0.83
   2   8 -11   23.62    1.04
  -2   8 -11   24.92    0.90
  -2   8 -11   24.25    1.02
   2   8  11   23.58    0.83
   2  -8 -11   25.05    0.99
   2   8  11   22.48    0.87
  -2  -8  11   24.21    0.98
  -2   9  11    1.83    0.33
   2  -9  11    2.15    0.47
  -2   9  11    1.26    0.32
   2   9 -11    2.42    0.44
   2  -9 -11    2.65    0.41
   2   9  11    1.84    0.33
  -2  -9  11    0.92    0.39
   2   9  11    1.81    0.34
  -2   9 -11    1.34    0.33
   2  10 -11    7.55    0.69
  -2  10  11    7.18    0.55
  -2  10  11    7.91    0.57
   2 -10  11    9.45    0.72
   2  10  11    6.45    0.54
  -2 -10  11    7.79    0.64
   2  10  11    6.90    0.51
   2  10  11    7.78    0.56
  -2   0 -12    9.32    0.53
  -2   0  12    9.10    0.54
   2   0  12    8.79    0.53
   2   0 -12    9.58    0.57
  -2   0  12    8.14    0.38
   2  -1  12    6.86    0.48
  -2  -1 -12    7.75    0.49
  -2   1  12    6.92    0.35
   2   1 -12    6.63    0.52
  -2   1  12    6.94    0.51
   2  -1 -12    6.78    0.51
  -2  -1  12    5.95    0.48
  -2   1 -12    7.54    0.48
   2   1  12    8.00    0.50
  -2  -1  12    7.14    0.34
   2  -2  12   14.87    0.70
  -2  -2 -12   15.30    0.65
  -2   2  12   13.56    0.64
   2   2 -12   14.44    0.69
  -2   2  12   13.69    0.54
  -2   2 -12   13.98    0.66
   2   2  12   14.02    0.43
  -2  -2  12   14.40    0.51
   2  -2 -12   15.33    0.71
   2   2  12   14.20    0.62
  -2  -2  12   14.24    0.68
   2   3 -12   35.73    1.24
  -2   3  12   35.35    1.05
   2  -3  12   33.79    1.18
  -2   3  12   35.03    1.15
  -2  -3 -12   36.39    1.13
  -2   3 -12   36.75    1.20
   2   3  12   35.02    1.10
  -2  -3  12   34.77    1.00
   2  -3 -12   36.40    1.20
   2   3  12   34.89    0.96
  -2  -3  12   34.34    1.17
  -2   4  12    0.23    0.21
   2   4 -12    0.19    0.31
  -2  -4 -12    0.50    0.27
  -2   4  12    0.87    0.28
   2  -4  12    0.44    0.31
  -2   4 -12    0.46    0.29
   2   4  12    0.66    0.17
  -2  -4  12    0.92    0.18
   2  -4 -12    0.87    0.32
  -2  -4  12    0.50    0.30
   2   4  12    0.45    0.27
   2  -5  12   41.28    1.36
   2   5 -12   41.35    1.42
  -2   5  12   41.36    1.25
  -2   5  12   41.63    1.29
  -2  -5  12   40.24    1.35
  -2  -5  12   41.02    1.18
   2  -5 -12   42.74    1.37
  -2   5 -12   41.07    1.39
   2   5  12   41.75    1.19
   2   5  12   42.59    1.24
  -2   6  12   15.44    0.69
  -2   6  12   16.09    0.60
   2   6 -12   13.90    0.76
   2  -6  12   13.64    0.74
  -2   6  12   14.38    0.63
   2  -6 -12   15.83    0.77
   2   6  12   15.78    0.61
  -2  -6  12   15.14    0.76
  -2   6 -12   14.46    0.77
   2   7 -12    2.98    0.45
  -2   7  12    2.95    0.34
   2  -7  12    2.10    0.42
  -2   7  12    3.07    0.38
  -2   7  12    2.67    0.33
   2  -7 -12    3.21    0.42
   2   7  12    2.91    0.35
  -2  -7  12    2.97    0.44
  -2   7 -12    2.49    0.40
   2   7  12    2.46    0.30
  -2   8  12   11.08    0.61
  -2   8  12   11.04    0.61
   2   8 -12   10.92    0.74
  -2   8  12    9.35    0.56
   2  -8  12   11.29    0.72
  -2  -8  12   11.44    0.70
   2   8  12   11.00    0.57
  -2   8 -12   11.88    0.74
   2   8  12   11.40    0.59
   2  -8 -12   11.27    0.70
   2  -9  12   26.01    1.08
  -2   9  12   23.38    0.88
  -2   9  12   23.82    0.97
   2   9 -12   23.89    1.11
   2   9  12   24.56    0.89
   2   9  12   24.24    0.92
  -2   9 -12   22.80    1.05
  -2  -9  12   24.08    1.05
   2   9  12   22.62    0.89
   2   0  13   41.36    1.30
  -2   0  13   42.57    1.34
  -2   0  13   41.00    1.14
   2   0 -13   41.00    1.37
  -2   0 -13   41.69    1.33
   2  -1  13    3.72    0.43
  -2   1  13    2.94    0.40
  -2  -1 -13    3.46    0.38
   2   1 -13    3.65    0.43
  -2   1  13    3.86    0.29
  -2   1 -13    3.24    0.39
   2   1  13    4.25    0.41
  -2  -1  13    3.26    0.27
  -2  -1  13    3.48    0.42
   2  -1 -13    3.78    0.43
  -2   2  13   13.68    0.52
  -2  -2 -13   13.67    0.66
   2   2 -13   12.94    0.71
  -2   2  13   13.30    0.66
   2  -2  13   12.51    0.67
   2  -2 -13   12.74    0.70
   2   2  13   13.79    0.66
  -2  -2  13   13.88    0.49
  -2  -2  13   14.25    0.70
  -2   2 -13   13.86    0.68
  -2   3  13    5.73    0.37
   2   3 -13    6.21    0.55
  -2   3  13    6.15    0.50
   2  -3  13    6.09    0.51
   2   3  13    5.85    0.46
  -2  -3  13    5.95    0.33
  -2  -3  13    5.36    0.50
  -2   3 -13    6.57    0.51
   2   3  13    5.94    0.28
   2  -3 -13    6.64    0.54
  -2   4  13    6.67    0.41
   2  -4  13    5.91    0.53
   2   4 -13    6.16    0.57
  -2   4  13    6.52    0.48
   2   4  13    6.61    0.33
  -2   4 -13    6.43    0.53
  -2  -4  13    5.71    0.51
   2   4  13    6.99    0.47
  -2  -4  13    6.56    0.35
   2  -4 -13    7.34    0.58
   2  -5  13   12.82    0.71
  -2   5  13   11.51    0.63
  -2   5  13   13.11    0.57
   2   5 -13   10.14    0.67
   2   5  13   11.46    0.49
  -2  -5  13   12.10    0.49
   2   5  13   11.91    0.60
   2  -5 -13   10.87    0.66
  -2   5 -13   12.30    0.67
  -2  -5  13   12.36    0.69
   2  -6  13   34.28    1.25
  -2   6  13   35.32    1.17
  -2   6  13   35.84    1.13
   2   6 -13   33.66    1.30
   2   6  13   34.20    1.05
  -2  -6  13   35.40    1.25
  -2  -6  13   32.95    1.03
  -2   6 -13   34.38    1.28
   2  -6 -13   34.79    1.25
  -2   7  13    4.56    0.42
  -2   7  13    4.24    0.46
   2   7 -13    4.29    0.53
   2  -7  13    4.49    0.53
  -2   7  13    4.85    0.40
   2   7  13    4.09    0.36
  -2   7 -13    4.49    0.53
  -2  -7  13    3.83    0.51
   2   7  13    4.18    0.35
  -2   8  13   16.44    0.76
  -2   8  13   16.87    0.77
   2  -8  13   16.41    0.91
   2   8 -13   15.64    0.88
  -2   8  13   17.21    0.70
  -2   8 -13   16.60    0.90
   2   8  13   16.17    0.69
  -2  -8  13   17.78    0.91
   2   8  13   16.62    0.71
   2   8  13   18.46    0.73
   2   0 -14    5.77    0.55
  -2   0  14    7.42    0.35
  -2   0 -14    6.40    0.51
  -2   0  14    8.20    0.56
   2   0  14    7.93    0.55
  -2  -1 -14    1.89    0.33
   2  -1  14    1.79    0.36
  -2   1  14    2.10    0.22
  -2   1  14    1.91    0.38
   2   1 -14    2.09    0.39
   2  -1 -14    2.06    0.38
  -2   1 -14    1.54    0.34
  -2  -1  14    1.84    0.21
   2   1  14    1.75    0.36
  -2  -1  14    1.42    0.36
  -2   2  14    1.46    0.22
   2  -2  14    1.25    0.37
   2   2 -14    1.86    0.39
  -2   2  14    1.17    0.35
   2   2  14    1.21    0.33
  -2  -2  14    1.36    0.18
   2  -2 -14    1.28    0.37
  -2   2 -14    1.07    0.33
  -2  -2  14    1.67    0.37
   2   3 -14   23.47    1.01
  -2   3  14   24.03    0.95
  -2   3  14   24.34    0.80
   2  -3  14   24.36    0.97
  -2  -3  14   24.04    0.72
   2  -3 -14   24.17    0.98
  -2  -3  14   21.78    0.95
  -2   3 -14   24.35    0.97
   2   3  14   22.99    0.90
  -2   4  14   11.42    0.54
   2  -4  14   10.89    0.71
   2   4 -14   11.64    0.74
  -2   4  14    9.94    0.63
  -2   4 -14   11.62    0.69
  -2  -4  14   10.74    0.71
   2   4  14   11.91    0.62
  -2  -4  14   11.53    0.46
   2  -4 -14   11.49    0.68
   2   5 -14   31.30    1.22
   2  -5  14   31.20    1.18
  -2   5  14   32.00    1.02
  -2   5  14   31.94    1.12
   2   5  14   31.90    0.91
  -2   5 -14   30.20    1.19
  -2  -5  14   29.34    1.16
   2   5  14   32.91    1.07
   2  -5 -14   28.81    1.14
   2   5  14   31.74    0.93
  -2  -5  14   30.86    0.92
  -2   6  14    7.01    0.48
   2   6 -14    5.83    0.60
  -2   6  14    5.70    0.52
   2  -6  14    6.18    0.61
  -2  -6  14    5.95    0.37
  -2   6 -14    6.53    0.62
   2   6  14    6.09    0.38
   2   6  14    6.63    0.39
  -2  -6  14    5.98    0.60
   2   0 -15   47.87    1.59
  -2   0  15   46.24    1.53
   2   0  15   47.83    1.52
   2   1 -15    5.15    0.53
   2  -1  15    5.61    0.54
  -2   1  15    7.03    0.58
   2  -1 -15    5.67    0.56
  -2   1 -15    5.07    0.49
   2   1  15    6.07    0.54
  -2  -1  15    5.75    0.55
   2   2 -15   19.70    0.95
  -2   2  15   21.38    0.91
   2  -2  15   19.96    0.91
  -2   2  15   20.95    0.71
   2   2  15   21.51    0.90
  -2  -2  15   21.51    0.97
   2  -2 -15   21.66    0.95
  -2   2 -15   22.82    0.95
   2  -3  15   14.33    0.76
   2   3 -15   13.20    0.79
  -2   3  15   13.04    0.55
  -2   3  15   12.60    0.72
  -2   3 -15   12.55    0.72
   2  -3 -15   11.97    0.73
  -2  -3  15   13.28    0.75
   2   3  15   13.29    0.69
  -2   4  15    1.05    0.24
   2   4 -15    0.56    0.38
   2  -4  15    0.62    0.39
  -2   4  15    0.96    0.37
   2   4  15    1.49    0.35
  -2   4 -15    0.48    0.35
  -2  -4  15    0.58    0.38
   2  -5  15   11.55    0.77
  -2   5  15   11.16    0.67
  -2  -5  15    9.93    0.72
   2   0  16   14.49    0.76
  -2   0  16   13.03    0.77
   3   0   0   -0.10    0.07
   3   0   0   -0.22    0.06
  -3   0   0   -0.11    0.07
   3  -1   0    7.47    0.30
  -3  -1   0    7.30    0.25
  -3   1   0    6.85    0.28
   3   1   0    7.39    0.25
  -3   1   0    7.05    0.26
   3  -1   0    7.95    0.27
   3  -1   0    7.00    0.26
   3  -2   0  119.63    2.94
  -3   2   0  122.69    2.91
   3   2   0  121.50    2.89
   3   2   0  122.08    2.95
   3  -2   0  127.08    2.91
  -3   2   0  123.82    3.04
  -3  -3   0  206.34    4.78
   3   3   0  197.76    4.78
   3  -3   0  195.09    4.77
   3   3   0  197.74    4.68
   3  -3   0  196.66    4.92
   3  -3   0  200.36    4.70
  -3  -3   0  207.27    4.68
  -3   3   0  199.92    4.71
  -3   3   0  197.36    4.77
  -3   4   0  666.00   15.78
   3   4   0  639.54   15.88
  -3   4   0  656.74   15.81
   3  -4   0  676.24   15.60
   3   4   0  646.37   15.56
  -3   5   0   38.30    1.05
  -3   5   0   37.57    1.05
   3   5   0   37.15    1.05
   3   5   0   36.89    1.04
  -3   6   0   35.47    1.06
  -3   6   0   36.85    0.96
   3   6   0   38.01    1.07
  -3   6   0   36.92    1.06
   3   6   0   37.49    1.06
   3   6   0   37.94    1.08
   3   6   0   34.78    0.93
   3   7   0    7.99    0.43
  -3   7   0    8.16    0.44
   3   7   0    7.46    0.44
  -3   7   0    7.82    0.40
   3   7   0    8.69    0.44
  -3   7   0    8.04    0.44
   3   7   0    7.59    0.39
  -3   8   0    1.55    0.27
  -3   8   0    1.56    0.30
   3   8   0    1.65    0.25
   3   8   0    1.32    0.25
   3   8   0    1.52    0.26
   3   8   0    1.80    0.28
  -3   8   0    1.72    0.28
   3   9   0    2.57    0.32
  -3   9   0    2.24    0.32
   3   9   0    2.36    0.34
  -3   9   0    2.11    0.33
  -3   9   0    2.84    0.34
   3   9   0    2.36    0.34
   3   9   0    3.13    0.32
  -3  10   0   49.37    1.51
   3  10   0   50.98    1.54
  -3  10   0   52.44    1.55
   3  10   0   50.82    1.54
  -3  10   0   48.64    1.36
   3  10   0   50.78    1.36
   3  10   0   50.12    1.50
   3  11   0    0.95    0.31
   3  11   0    1.12    0.32
  -3  11   0    0.87    0.30
  -3  11   0    1.19    0.31
  -3  11   0    1.31    0.32
   3  11   0    0.84    0.34
   3  11   0    1.51    0.30
  -3  12   0   21.75    0.94
  -3  12   0   21.33    0.93
   3  12   0   21.59    0.91
   3  12   0   23.83    0.85
   3  12   0   23.36    0.95
  -3  12   0   21.43    0.84
   3  13   0    2.55    0.41
   3  13   0    2.83    0.42
  -3  13   0    2.39    0.42
   3  13   0    2.64    0.39
  -3  13   0    2.77    0.40
  -3  13   0    2.69    0.39
  -3  14   0    0.12    0.34
  -3  14   0    0.80    0.33
  -3  14   0    0.49    0.34
  -3  14   0    0.66    0.32
   3  14   0    0.39    0.35
   3  14   0    0.01    0.32
   3  14   0    0.08    0.33
  -3   0   1   -0.05    0.08
  -3   0  -1   -0.12    0.06
   3   0  -1   -0.02    0.09
  -3   0  -1    0.04    0.07
  -3   0   1   -0.11    0.07
  -3   0   1   -0.06    0.09
   3   0  -1   -0.04    0.08
   3   0   1   -0.05    0.07
   3   0   1   -0.04    0.07
  -3  -1  -1  240.80    5.38
  -3   1   1  234.19    5.67
   3  -1   1  223.43    5.62
   3   1  -1  245.30    5.79
   3   1  -1  227.51    5.51
   3  -1   1  224.78    5.52
  -3  -1  -1  241.94    5.65
  -3  -1  -1  243.56    5.50
  -3   1   1  227.65    5.51
  -3   1   1  217.42    5.51
  -3   1   1  235.20    5.42
   3  -1  -1  231.83    5.51
   3  -1  -1  245.15    5.74
   3   1   1  222.25    5.61
  -3   1  -1  238.69    5.50
  -3  -1   1  224.78    5.65
  -3   1  -1  233.42    5.55
  -3   1  -1  239.75    5.65
  -3   1  -1  238.96    5.55
   3   1   1  223.80    5.65
   3  -2   1   20.24    0.56
  -3   2   1   19.49    0.58
  -3   2   1   20.66    0.59
  -3   2   1   20.98    0.58
   3   2  -1   20.43    0.60
  -3   2  -1   20.16    0.56
  -3   2  -1   20.22    0.60
   3  -2  -1   19.97    0.57
  -3   2  -1   23.40    0.62
  -3  -2   1   20.05    0.58
   3  -2  -1   19.88    0.59
   3   2   1   19.76    0.57
   3   2   1   20.43    0.56
   3  -2  -1   20.77    0.64
  -3  -2   1   20.81    0.57
  -3   3   1   68.06    1.67
   3   3  -1   67.42    1.67
   3  -3   1   67.56    1.68
  -3   3   1   66.73    1.70
   3   3   1   67.55    1.66
   3   3   1   68.54    1.70
  -3   3  -1   68.46    1.76
  -3  -3   1   70.57    1.67
  -3  -3   1   68.58    1.67
  -3   3  -1   65.43    1.68
   3  -3  -1   67.22    1.70
   3  -3  -1   68.36    1.67
  -3  -3   1   67.93    1.70
   3  -3  -1   67.64    1.77
  -3   3  -1   66.49    1.68
   3  -4   1   10.40    0.40
   3   4  -1   10.24    0.40
   3   4  -1   10.27    0.41
  -3   4   1   11.23    0.42
   3   4   1   10.71    0.40
   3  -4  -1    9.96    0.45
  -3   4  -1    9.74    0.39
   3   4   1   10.77    0.42
   3   5  -1  101.70    2.56
   3   5  -1  101.72    2.55
   3   5  -1  102.99    2.60
   3  -5   1  107.83    2.59
  -3   5   1  107.67    2.57
  -3   5   1  103.57    2.61
   3   5   1  103.76    2.60
  -3   5  -1  103.03    2.57
   3   5   1  103.26    2.55
  -3   5  -1  104.91    2.59
  -3   6   1   22.87    0.74
  -3   6   1   22.94    0.74
   3   6  -1   22.64    0.74
   3   6  -1   23.00    0.75
   3   6  -1   22.08    0.64
   3   6  -1   23.04    0.76
  -3   6   1   22.24    0.67
   3   6   1   23.10    0.66
  -3   6  -1   22.62    0.66
   3   6   1   22.58    0.74
  -3   6  -1   22.91    0.75
  -3   6  -1   23.11    0.74
  -3   7   1  170.25    4.11
   3   7  -1  170.33    3.69
   3   7  -1  165.76    4.10
  -3   7   1  169.97    4.16
  -3   7   1  162.42    3.71
   3   7  -1  167.56    4.07
   3   7  -1  171.39    4.16
   3   7   1  164.60    4.10
  -3   7  -1  168.80    4.11
   3   7   1  166.14    3.70
  -3   7  -1  162.36    4.14
   3   7   1  170.83    4.16
   3   7   1  169.06    4.08
  -3   7  -1  168.92    3.70
   3   8  -1   22.48    0.82
  -3   8   1   22.23    0.80
   3   8  -1   21.75    0.78
   3   8  -1   22.36    0.82
  -3   8   1   22.98    0.75
   3   8  -1   23.55    0.72
  -3   8   1   21.72    0.80
  -3   8  -1   22.90    0.81
  -3   8  -1   23.08    0.84
  -3   8  -1   22.93    0.73
   3   8   1   21.30    0.79
   3   8   1   22.19    0.72
   3   8   1   22.28    0.82
   3   9  -1   27.17    0.94
  -3   9   1   24.53    0.92
  -3   9   1   23.99    0.82
   3   9  -1   25.78    0.89
  -3   9   1   25.57    0.91
   3   9  -1   25.54    0.92
   3   9  -1   26.00    0.80
   3   9   1   24.11    0.89
  -3   9  -1   27.72    0.93
  -3  -9   1   24.05    0.82
  -3   9  -1   27.07    0.95
   3   9   1   24.05    0.91
   3   9   1   25.73    0.93
   3   9   1   24.75    0.82
  -3   9  -1   26.67    0.84
   3  10  -1   39.17    1.07
   3  10  -1   35.76    1.19
  -3  10   1   35.35    1.19
   3  10  -1   36.95    1.21
  -3  10   1   35.19    1.08
  -3  10   1   36.26    1.20
   3  10  -1   34.71    1.16
   3  10   1   35.77    1.07
   3  10   1   36.34    1.21
  -3  10  -1   38.42    1.22
   3  10   1   36.22    1.17
  -3  10  -1   37.85    1.08
  -3  10  -1   36.82    1.21
   3  11  -1   -0.46    0.26
   3  11  -1   -0.29    0.25
   3  11  -1    0.23    0.27
  -3  11   1    0.16    0.26
  -3  11   1    0.38    0.30
   3  11  -1   -0.09    0.27
  -3  11   1    0.27    0.29
  -3  11  -1   -0.21    0.27
   3  11   1    0.29    0.28
  -3  11  -1    0.66    0.31
  -3  11  -1   -0.06    0.26
   3  11   1    0.14    0.27
   3  11   1    0.44    0.28
  -3  12   1    1.13    0.31
   3  12  -1    1.55    0.34
   3  12  -1    1.00    0.31
   3  12  -1    0.55    0.29
   3  12  -1    0.99    0.34
  -3  12   1    0.80    0.32
  -3  12   1    1.14    0.31
   3  12   1    1.38    0.33
  -3  12  -1    1.05    0.33
  -3  12  -1    1.41    0.32
   3  12   1    0.82    0.28
  -3  12  -1    1.36    0.35
   3  12   1    0.96    0.31
  -3  13   1   12.58    0.69
   3  13  -1   13.72    0.66
  -3  13   1   13.09    0.73
  -3  13   1   12.70    0.74
   3  13  -1   12.45    0.70
   3  13  -1   11.76    0.68
  -3  13  -1   12.71    0.72
   3  13   1   13.34    0.70
  -3  13  -1   11.86    0.71
  -3  13  -1   11.08    0.64
   3  13   1   11.39    0.65
   3  13   1   12.69    0.71
  -3  13  -1   12.22    0.68
  -3  14   1    0.48    0.37
  -3  14   1   -0.18    0.32
   3  14  -1    0.88    0.37
   3  14  -1    0.49    0.32
  -3  14   1    0.13    0.31
   3  14  -1   -0.37    0.30
   3  14   1    0.37    0.35
  -3  14  -1   -0.01    0.32
   3  14   1   -0.01    0.33
  -3  14  -1   -0.10    0.32
  -3  14  -1   -0.23    0.31
   3  14   1   -0.29    0.31
  -3  14  -1    0.32    0.36
   3   0  -2    0.34    0.13
  -3   0   2   -0.07    0.10
  -3   0   2   -0.12    0.10
   3   0  -2   -0.15    0.10
   3   0   2   -0.05    0.07
  -3   0  -2   -0.04    0.06
  -3  -1  -2   19.14    0.50
  -3   1   2   19.19    0.56
   3  -1   2   18.68    0.50
  -3   1   2   18.47    0.55
   3   1  -2   19.57    0.59
  -3  -1  -2   18.90    0.51
  -3   1   2   19.29    0.51
   3   1  -2   19.00    0.55
   3  -1  -2   19.66    0.59
   3  -1  -2   18.42    0.56
  -3   1  -2   18.91    0.55
   3   1   2   19.31    0.51
  -3  -1   2   18.39    0.55
  -3   1  -2   19.23    0.50
  -3  -1   2   18.23    0.57
  -3   1  -2   19.75    0.50
   3   2  -2   66.94    1.63
  -3   2   2   63.29    1.53
   3  -2   2   63.20    1.56
   3  -2   2   61.22    1.54
  -3   2   2   61.77    1.58
  -3  -2  -2   65.59    1.56
  -3   2   2   63.06    1.58
   3   2  -2   63.57    1.58
   3   2   2   61.88    1.55
  -3   2  -2   62.68    1.54
   3   2   2   62.74    1.52
  -3  -2   2   61.38    1.53
   3   2   2   62.68    1.54
  -3  -2   2   60.52    1.57
   3  -2  -2   65.54    1.53
  -3   2  -2   65.38    1.56
   3  -2  -2   63.32    1.58
  -3  -2   2   60.80    1.54
   3  -3   2   19.41    0.57
   3   3  -2   20.78    0.61
  -3   3   2   20.31    0.58
  -3  -3   2   19.95    0.60
   3  -3  -2   20.87    0.58
   3   3   2   20.70    0.58
   3   3   2   19.48    0.55
  -3   3  -2   20.55    0.58
   3   3   2   19.96    0.59
  -3  -3   2   20.21    0.58
   3  -3  -2   19.38    0.65
  -3   4   2  187.42    4.73
   3   4  -2  197.68    4.66
   3   4  -2  201.73    4.74
   3   4  -2  201.97    4.64
   3  -4   2  195.24    4.70
  -3   4   2  195.74    4.65
   3  -4  -2  191.99    4.87
   3   4   2  194.58    4.72
  -3   4  -2  194.54    4.70
  -3  -4   2  204.13    4.73
  -3   4  -2  196.43    4.67
   3   4   2  193.23    4.62
   3   4   2  196.84    4.80
  -3   5   2   23.57    0.75
  -3   5   2   25.31    0.74
   3  -5   2   24.36    0.72
   3   5  -2   22.83    0.73
  -3   5   2   23.61    0.68
   3   5  -2   22.36    0.74
   3   5  -2   23.02    0.73
   3   5   2   24.82    0.74
   3  -5  -2   23.15    0.78
   3   5   2   24.86    0.75
   3   5   2   23.51    0.66
   3   5   2   25.59    0.73
  -3   5  -2   23.17    0.71
  -3   6   2   31.93    0.98
   3   6  -2   34.28    1.01
   3   6  -2   34.61    0.99
   3  -6   2   33.20    0.99
  -3   6   2   33.52    0.90
   3   6  -2   35.73    1.00
  -3   6   2   34.28    1.01
  -3   6  -2   35.70    1.02
   3   6   2   33.09    0.90
   3   6   2   33.35    0.98
   3   6   2   33.18    1.00
  -3   6  -2   33.41    0.99
  -3   6  -2   34.57    0.88
  -3   7   2   13.64    0.56
  -3   7   2   13.24    0.53
   3   7  -2   14.38    0.49
   3   7  -2   13.98    0.56
   3   7  -2   13.64    0.57
  -3   7   2   14.43    0.59
   3   7  -2   14.44    0.58
  -3   7  -2   13.06    0.55
  -3   7  -2   13.96    0.59
  -3   7  -2   14.11    0.51
   3   7   2   13.28    0.57
   3   7   2   13.63    0.52
   3   7   2   13.39    0.58
  -3   8   2   19.53    0.75
   3   8  -2   21.57    0.77
   3   8  -2   21.91    0.79
  -3   8   2   20.13    0.71
  -3   8   2   20.12    0.76
   3   8  -2   21.20    0.67
   3   8  -2   21.47    0.79
  -3   8  -2   21.79    0.69
   3   8   2   21.03    0.70
   3   8   2   21.17    0.77
  -3   8  -2   20.97    0.80
  -3  -8   2   20.16    0.71
   3   8   2   20.21    0.78
  -3   8  -2   21.35    0.77
  -3   9   2    5.29    0.48
   3   9  -2    6.53    0.49
   3   9  -2    6.32    0.47
  -3   9   2    5.70    0.46
   3   9  -2    6.41    0.47
   3   9  -2    5.81    0.39
  -3   9   2    7.03    0.47
  -3   9  -2    5.97    0.42
  -3   9  -2    6.54    0.52
  -3   9  -2    5.92    0.46
   3   9   2    5.81    0.43
   3   9   2    6.92    0.49
  -3  -9   2    7.27    0.48
   3   9   2    5.95    0.46
   3  10  -2   94.73    2.23
  -3  10   2   93.91    2.56
   3  10  -2   96.46    2.55
   3  10  -2   93.04    2.52
  -3  10   2   92.32    2.51
   3  10  -2   93.59    2.49
  -3  10   2   94.47    2.29
   3  10   2   92.00    2.54
  -3  10  -2   93.00    2.52
  -3  10  -2   93.92    2.25
   3  10   2   92.72    2.27
   3  10   2   91.11    2.49
  -3 -10   2   94.33    2.35
  -3  10  -2   93.21    2.53
  -3  11   2    0.73    0.30
   3  11  -2   -0.36    0.26
   3  11  -2    0.35    0.26
   3  11  -2    0.39    0.29
  -3  11   2    0.38    0.30
   3  11  -2   -0.20    0.29
  -3  11   2    0.66    0.29
  -3  11  -2    0.12    0.26
   3  11   2    0.26    0.27
  -3  11  -2   -0.04    0.28
   3  11   2   -0.19    0.27
   3  11   2   -0.25    0.27
  -3 -11   2   -0.19    0.29
  -3  11  -2    0.25    0.31
   3  12  -2   49.47    1.37
   3  12  -2   49.06    1.59
  -3  12   2   49.79    1.43
  -3  12   2   48.04    1.57
  -3  12   2   50.00    1.59
   3  12  -2   48.24    1.57
   3  12  -2   49.17    1.54
  -3  12  -2   48.81    1.55
   3  12   2   48.89    1.59
   3  12   2   49.71    1.43
  -3  12  -2   49.98    1.59
  -3  12  -2   48.87    1.39
  -3  12  -2   49.85    1.58
   3  12   2   48.07    1.55
  -3  13   2    7.20    0.61
  -3  13   2    7.03    0.59
   3  13  -2    7.34    0.55
  -3  13   2    6.75    0.54
   3  13  -2    7.43    0.56
   3  13  -2    6.38    0.52
   3  13   2    7.17    0.58
  -3  13  -2    7.74    0.59
  -3  13  -2    6.83    0.58
  -3  13  -2    6.61    0.56
   3  13   2    6.85    0.59
   3  13   2    8.13    0.59
  -3  13  -2    7.79    0.55
  -3  14   2    0.23    0.34
  -3  14   2    1.26    0.38
   3  14  -2    0.46    0.34
  -3  14   2    0.65    0.39
   3  14  -2    0.32    0.34
   3  14  -2    0.31    0.33
   3  14   2    0.52    0.37
  -3  14  -2   -0.20    0.30
  -3  14  -2    0.58    0.39
   3  14   2    0.28    0.33
   3  14   2    0.91    0.36
   3   0  -3   -0.06    0.10
  -3   0   3    0.01    0.10
   3   0  -3   -0.02    0.13
  -3   0  -3   -0.01    0.05
  -3   0  -3    0.00    0.05
  -3   0   3   -0.17    0.09
   3   0   3   -0.05    0.05
   3   1  -3  233.89    5.59
  -3   1   3  230.36    5.59
   3  -1   3  233.49    5.52
   3   1  -3  239.20    5.76
  -3  -1  -3  244.35    5.54
  -3   1   3  236.32    5.47
  -3   1   3  232.60    5.59
  -3  -1  -3  235.85    5.68
   3  -1  -3  236.53    5.59
  -3   1  -3  237.67    5.52
   3   1   3  232.40    5.43
  -3  -1   3  232.06    5.58
  -3   1  -3  234.75    5.52
  -3  -1   3  230.79    5.46
   3  -1  -3  238.74    5.77
   3   1   3  233.81    5.54
  -3   1  -3  239.43    5.51
  -3   2   3    0.85    0.13
  -3  -2  -3    1.04    0.11
  -3   2   3    0.95    0.14
  -3  -2  -3    0.92    0.08
   3   2  -3    1.09    0.16
   3  -2   3    0.82    0.12
   3   2  -3    0.99    0.14
  -3   2   3    0.87    0.11
   3  -2   3    1.08    0.10
   3  -2  -3    1.13    0.18
  -3  -2   3    0.66    0.10
   3  -2  -3    1.19    0.12
  -3   2  -3    1.31    0.15
  -3  -2   3    0.91    0.13
   3   2   3    0.83    0.11
   3   2   3    1.06    0.12
   3   2   3    0.85    0.07
  -3   2  -3    0.75    0.09
  -3   3   3    5.99    0.29
   3   3  -3    5.94    0.30
  -3   3   3    6.85    0.28
   3   3  -3    5.56    0.27
   3  -3   3    6.79    0.26
  -3   3   3    6.03    0.31
   3  -3  -3    6.15    0.34
  -3   3  -3    5.99    0.25
  -3   3  -3    5.79    0.31
   3   3   3    6.52    0.28
   3  -3  -3    5.99    0.27
  -3  -3   3    6.09    0.29
  -3  -3   3    6.72    0.28
   3   3   3    6.39    0.27
   3   3   3    6.50    0.24
  -3  -3   3    6.52    0.30
   3   4  -3   35.19    0.98
   3   4  -3   35.55    1.00
   3  -4   3   37.13    0.97
   3   4  -3   34.44    0.97
  -3   4   3   35.24    1.01
  -3   4   3   36.75    0.97
  -3   4  -3   34.12    0.96
  -3  -4   3   38.36    0.99
  -3  -4   3   37.98    1.01
   3   4   3   36.70    0.96
  -3   4  -3   33.91    0.99
   3   4   3   35.99    0.99
   3  -4  -3   34.64    1.05
   3   4   3   36.12    0.97
  -3   5   3  171.97    3.77
   3   5  -3  174.84    4.13
  -3   5   3  173.91    4.14
   3  -5   3  169.27    4.08
   3   5  -3  174.46    4.22
  -3   5   3  170.33    4.23
   3  -5   3  178.38    4.19
   3   5  -3  172.56    4.15
   3  -5  -3  172.26    4.35
   3   5   3  172.78    4.21
  -3   5  -3  176.96    4.18
   3   5   3  171.36    4.13
   3   5   3  179.67    4.27
   3   5   3  169.06    3.77
  -3   5  -3  167.97    4.18
   3  -6   3   28.18    0.89
  -3   6   3   28.04    0.81
   3   6  -3   29.37    0.88
  -3   6   3   28.11    0.91
   3   6  -3   29.96    0.90
  -3   6   3   29.84    0.88
   3   6  -3   29.72    0.88
   3  -6   3   29.79    0.87
  -3   6  -3   28.15    0.78
  -3   6  -3   27.86    0.87
   3   6   3   29.35    0.88
   3   6   3   27.99    0.81
   3   6   3   29.23    0.89
  -3   6  -3   29.30    0.90
   3  -6  -3   28.43    0.93
   3  -7   3  113.79    2.78
  -3   7   3  110.46    2.81
  -3   7   3  111.58    2.88
   3   7  -3  112.26    2.81
  -3   7   3  110.53    2.57
   3   7  -3  111.30    2.83
   3   7  -3  112.64    2.87
   3   7  -3  110.76    2.50
  -3  -7   3  115.89    2.72
  -3   7  -3  113.16    2.53
   3   7   3  113.25    2.81
  -3   7  -3  110.79    2.85
  -3   7  -3  109.72    2.84
   3   7   3  110.73    2.56
   3   7   3  112.70    2.87
  -3   8   3   24.25    0.87
   3   8  -3   24.50    0.87
   3  -8   3   24.48    0.90
   3   8  -3   24.47    0.85
   3   8  -3   24.88    0.72
   3   8  -3   24.80    0.87
  -3   8   3   23.42    0.85
  -3   8   3   23.18    0.78
  -3  -8   3   24.07    0.79
  -3   8  -3   23.61    0.83
   3   8   3   23.73    0.78
  -3   8  -3   24.24    0.86
   3   8   3   24.53    0.84
   3   8   3   23.15    0.82
  -3   8  -3   21.95    0.72
   3   9  -3   40.90    1.26
  -3   9   3   37.06    1.21
  -3   9   3   37.38    1.24
  -3   9   3   38.17    1.13
   3   9  -3   43.11    1.25
   3   9  -3   40.02    1.25
   3   9  -3   42.45    1.08
   3   9   3   39.13    1.14
   3   9   3   37.18    1.22
  -3   9  -3   40.12    1.27
   3   9   3   37.78    1.25
  -3   9  -3   40.92    1.10
  -3  -9   3   39.35    1.16
  -3   9  -3   41.89    1.24
  -3  10   3   12.71    0.64
  -3  10   3   12.04    0.65
   3  10  -3   13.64    0.66
  -3  10   3   13.36    0.63
   3  10  -3   12.18    0.54
   3  10  -3   13.65    0.65
   3  10  -3   13.84    0.68
   3  10   3   13.22    0.64
  -3  10  -3   12.63    0.64
  -3 -10   3   13.14    0.61
   3  10   3   14.23    0.64
   3  10   3   12.33    0.61
  -3  10  -3   13.22    0.65
  -3  10  -3   12.22    0.57
  -3  11   3    2.61    0.38
   3  11  -3    2.35    0.37
   3  11  -3    2.65    0.38
   3  11  -3    2.86    0.39
  -3  11   3    2.08    0.37
  -3  11   3    2.65    0.38
   3  11  -3    2.20    0.32
  -3 -11   3    2.15    0.36
  -3  11  -3    3.14    0.36
  -3  11  -3    2.94    0.38
   3  11   3    2.12    0.34
   3  11   3    2.01    0.36
  -3  11  -3    2.44    0.37
   3  11   3    2.51    0.35
  -3  11  -3    2.01    0.39
   3  12  -3    1.50    0.32
  -3  12   3    1.68    0.37
  -3  12   3    1.58    0.33
  -3  12   3    2.03    0.38
   3  12  -3    2.09    0.35
   3  12  -3    1.36    0.34
   3  12  -3    1.37    0.32
   3  12   3    1.30    0.35
  -3  12  -3    2.12    0.39
  -3 -12   3    1.21    0.35
  -3  12  -3    1.50    0.32
   3  12   3    1.65    0.33
   3  12   3    1.59    0.33
  -3  12  -3    1.68    0.33
  -3  12  -3    0.81    0.29
  -3  13   3   26.60    1.00
   3  13  -3   27.37    1.09
   3  13  -3   26.63    1.07
   3  13  -3   25.77    0.92
  -3  13   3   25.58    1.08
  -3  13   3   26.25    1.09
   3  13  -3   27.46    1.09
   3  13   3   26.17    1.00
  -3  13  -3   26.05    0.95
   3  13   3   27.85    1.09
  -3  13  -3   26.23    1.10
   3  13   3   28.72    1.12
  -3  14   3    0.21    0.31
   3  14  -3   -0.18    0.30
  -3  14   3   -0.30    0.29
  -3  14   3   -0.73    0.32
  -3  14  -3   -0.03    0.33
   3  14   3   -0.81    0.29
   3  14   3   -0.02    0.33
   3  14   3    0.08    0.33
  -3  14  -3   -0.16    0.31
   3   0  -4   -0.01    0.13
  -3   0   4    0.01    0.10
   3   0  -4   -0.02    0.10
  -3   0   4    0.02    0.10
  -3   1   4   78.44    1.98
  -3   1   4   78.71    1.87
  -3  -1  -4   79.86    1.91
   3   1  -4   78.26    1.97
  -3  -1  -4   79.96    1.97
   3   1  -4   80.28    2.06
  -3   1   4   79.98    1.98
  -3   1  -4   81.61    1.95
   3   1   4   81.31    1.91
   3  -1  -4   81.43    1.98
  -3  -1   4   79.39    1.97
   3  -1  -4   79.38    1.98
   3   1   4   80.28    1.87
  -3  -1   4   78.74    1.88
   3  -1  -4   80.45    2.06
  -3   2   4  103.57    2.59
  -3  -2  -4  107.73    2.58
   3  -2   4  105.24    2.51
  -3  -2  -4  107.94    2.54
  -3   2   4  106.48    2.49
   3   2  -4  101.93    2.58
  -3   2   4  104.44    2.59
   3   2   4  104.67    2.57
  -3   2  -4  105.24    2.55
  -3   2  -4  105.98    2.51
  -3  -2   4  105.34    2.58
   3   2   4  108.22    2.49
   3  -2  -4  102.88    2.67
   3  -2  -4  107.07    2.49
  -3  -2   4  103.73    2.49
   3   2   4  107.27    2.54
  -3   3   4   11.09    0.41
  -3   3   4   10.43    0.42
  -3  -3  -4   10.74    0.35
  -3   3   4   10.63    0.36
   3   3  -4   10.91    0.46
   3  -3   4   10.73    0.35
   3   3  -4   10.30    0.39
   3   3  -4   10.12    0.37
   3   3   4   10.72    0.37
   3   3   4   11.02    0.38
  -3  -3   4   10.50    0.39
  -3  -3   4   10.98    0.38
  -3   3  -4   10.09    0.35
   3  -3  -4   10.81    0.37
  -3  -3   4   10.95    0.37
   3  -3  -4   10.88    0.47
  -3   3  -4   10.46    0.42
   3   3   4   11.41    0.34
  -3   4   4  197.17    4.64
  -3   4   4  198.74    4.76
   3   4  -4  193.70    4.74
   3   4  -4  194.82    4.65
   3  -4   4  196.18    4.69
  -3  -4   4  198.01    4.74
   3  -4  -4  195.67    4.90
   3   4   4  196.72    4.79
  -3   4  -4  193.71    4.69
   3  -4  -4  200.55    4.64
  -3   4  -4  193.20    4.69
   3   4   4  197.55    4.73
  -3  -4   4  198.38    4.64
   3  -5   4   78.76    1.93
   3   5  -4   74.95    1.92
  -3   5   4   75.65    1.99
   3   5  -4   75.44    1.92
   3   5  -4   73.29    1.96
  -3   5   4   75.45    1.91
  -3   5   4   74.88    1.76
   3  -5   4   75.73    1.93
  -3   5  -4   77.13    1.96
   3   5   4   76.02    1.95
   3   5   4   77.94    1.94
   3   5   4   74.57    1.77
  -3   5  -4   76.03    1.92
   3  -5  -4   79.05    2.06
  -3   6   4   48.46    1.39
   3  -6   4   50.30    1.37
   3   6  -4   49.76    1.35
   3  -6   4   50.83    1.34
  -3   6   4   50.04    1.25
   3   6  -4   50.83    1.36
   3   6  -4   49.24    1.38
  -3   6   4   50.28    1.35
  -3   6  -4   50.49    1.39
   3   6   4   47.67    1.37
   3  -6  -4   49.53    1.44
   3   6   4   48.26    1.24
  -3  -6   4   49.62    1.32
  -3   6  -4   48.22    1.34
  -3   7   4    4.92    0.40
  -3   7   4    5.45    0.38
   3  -7   4    4.69    0.42
   3   7  -4    5.97    0.41
   3   7  -4    5.54    0.41
   3   7  -4    5.33    0.40
  -3   7   4    5.09    0.39
  -3  -7   4    5.16    0.40
  -3   7  -4    5.47    0.41
   3   7   4    4.56    0.36
  -3   7  -4    4.90    0.35
   3   7   4    4.98    0.36
   3   7   4    4.83    0.38
   3  -7  -4    5.47    0.46
  -3   7  -4    5.07    0.36
   3   8  -4    6.77    0.44
   3   8  -4    5.83    0.42
   3  -8   4    5.54    0.49
  -3   8   4    6.37    0.45
   3   8  -4    6.41    0.43
  -3   8   4    5.52    0.42
  -3   8   4    5.91    0.45
   3   8  -4    6.24    0.35
  -3  -8   4    5.98    0.45
  -3   8  -4    6.44    0.50
  -3   8  -4    6.39    0.40
   3   8   4    6.12    0.44
   3   8   4    5.97    0.42
  -3   8  -4    6.44    0.42
   3   8   4    5.57    0.42
   3   9  -4    0.23    0.24
   3   9  -4    0.20    0.25
   3  -9   4    0.29    0.31
   3   9  -4    0.00    0.24
  -3   9   4    0.04    0.22
   3   9  -4    0.15    0.20
  -3   9   4    0.44    0.26
  -3   9   4    0.07    0.24
  -3   9  -4    0.34    0.23
   3   9   4   -0.01    0.24
  -3   9  -4    0.26    0.22
  -3   9  -4   -0.26    0.24
  -3  -9   4    0.48    0.27
   3   9   4    0.15    0.22
   3   9   4   -0.01    0.21
  -3   9  -4   -0.07    0.22
  -3  10   4   71.37    2.06
   3  10  -4   76.06    2.10
  -3  10   4   73.61    1.90
  -3  10   4   70.62    2.11
   3  10  -4   77.04    2.07
   3  10  -4   77.20    1.82
   3  10  -4   77.69    2.11
   3 -10   4   76.42    2.07
  -3  10  -4   75.00    2.04
  -3 -10   4   72.52    1.97
   3  10   4   72.60    2.06
   3  10   4   75.58    1.91
  -3  10  -4   75.81    1.84
   3  10   4   69.83    2.09
  -3  10  -4   77.41    2.09
  -3  10  -4   74.82    2.10
   3  11  -4    1.99    0.36
  -3  11   4    1.71    0.35
  -3  11   4    1.43    0.33
   3 -11   4    1.91    0.40
   3  11  -4    1.55    0.35
   3  11  -4    1.96    0.30
  -3  11   4    1.65    0.34
   3  11  -4    1.69    0.34
  -3  11  -4    1.69    0.34
   3  11   4    1.99    0.36
   3  11   4    1.26    0.30
   3  11   4    1.55    0.32
  -3  11  -4    2.08    0.39
  -3  11  -4    1.59    0.33
  -3 -11   4    2.33    0.38
  -3  11  -4    1.60    0.31
  -3  12   4   43.19    1.46
   3  12  -4   44.05    1.23
   3  12  -4   42.55    1.41
   3  12  -4   42.86    1.43
  -3  12   4   40.68    1.29
   3  12  -4   42.84    1.41
  -3  12   4   41.13    1.40
   3  12   4   44.44    1.32
  -3  12  -4   44.19    1.45
  -3 -12   4   41.41    1.31
   3  12   4   41.17    1.39
   3  12   4   40.52    1.41
  -3  12  -4   43.35    1.24
   3  13  -4    4.87    0.50
  -3  13   4    4.62    0.51
  -3  13   4    4.48    0.49
   3  13  -4    4.10    0.41
  -3  13   4    4.69    0.49
   3  13   4    3.72    0.47
  -3  13  -4    4.84    0.45
   3  13   4    4.30    0.50
  -3  13  -4    3.96    0.50
   3  13   4    4.17    0.48
  -3   0   5   -0.12    0.10
  -3   0   5   -0.05    0.11
   3   0  -5   -0.08    0.11
   3   0  -5    0.13    0.16
  -3   0  -5    0.02    0.11
  -3  -1  -5  291.05    7.07
  -3  -1  -5  294.23    6.85
   3   1  -5  286.42    6.92
  -3   1   5  286.30    6.93
   3   1  -5  291.99    7.16
  -3   1   5  292.23    6.93
  -3  -1   5  290.46    6.92
  -3   1  -5  288.07    6.82
  -3  -1   5  295.31    6.74
   3  -1  -5  294.59    6.93
   3   1   5  301.66    6.72
   3   1   5  295.87    6.85
   3  -1  -5  286.45    7.16
  -3   2   5   34.72    0.94
  -3   2   5   33.06    0.94
   3   2  -5   32.58    0.92
  -3   2   5   33.35    0.84
   3   2  -5   34.38    1.01
  -3  -2  -5   32.93    0.88
   3  -2   5   34.08    0.83
  -3  -2  -5   33.61    0.87
   3  -2  -5   33.71    1.00
  -3  -2   5   33.99    0.92
  -3   2  -5   34.48    0.83
   3   2   5   34.10    0.85
   3  -2  -5   33.54    0.84
   3   2   5   34.72    0.88
   3   2   5   34.37    0.87
  -3   2  -5   34.05    0.81
  -3   2  -5   32.94    0.91
  -3  -2   5   32.83    0.84
   3  -3   5   39.22    0.99
   3   3  -5   39.55    1.15
  -3   3   5   37.39    1.08
  -3   3   5   39.69    0.99
   3   3  -5   37.06    1.06
  -3   3   5   39.53    1.07
   3   3  -5   39.33    1.01
  -3  -3  -5   39.37    1.03
   3   3   5   39.33    1.02
  -3  -3   5   39.23    1.00
  -3   3  -5   38.15    1.06
  -3  -3   5   39.05    1.06
   3   3   5   38.66    1.03
   3  -3  -5   39.08    1.14
  -3  -3   5   39.56    1.04
  -3   3  -5   39.53    0.97
  -3   3  -5   39.29    0.99
   3  -3  -5   38.97    1.00
  -3   4   5    0.13    0.15
   3   4  -5    0.48    0.19
  -3  -4  -5    0.32    0.13
   3   4  -5    0.31    0.15
   3  -4   5    0.49    0.12
   3   4  -5    0.41    0.16
  -3   4   5    0.55    0.14
   3   4   5    0.46    0.13
   3  -4  -5    0.35    0.14
  -3   4  -5    0.59    0.18
  -3  -4   5    0.53    0.20
  -3  -4   5    0.71    0.15
   3   4   5    0.39    0.15
  -3   4  -5    0.38    0.12
   3   4   5    0.68    0.17
  -3   4  -5    0.35    0.12
   3  -4  -5    0.28    0.19
  -3  -4   5    0.49    0.14
  -3   5   5   47.11    1.35
  -3   5   5   46.80    1.19
   3  -5   5   49.97    1.28
   3  -5   5   47.47    1.32
   3   5  -5   48.38    1.33
  -3   5   5   47.25    1.27
   3   5  -5   49.68    1.29
  -3   5  -5   50.65    1.33
   3  -5  -5   48.68    1.40
  -3   5  -5   47.90    1.27
  -3  -5   5   47.02    1.29
  -3   5  -5   48.22    1.25
   3   5   5   46.15    1.31
   3   5   5   50.74    1.29
   3   5   5   47.14    1.20
  -3   6   5    1.27    0.23
   3   6  -5    1.28    0.24
   3  -6   5    1.31    0.31
   3  -6   5    1.49    0.20
   3   6  -5    1.39    0.24
  -3   6   5    1.40    0.25
  -3   6   5    1.11    0.22
   3  -6  -5    1.29    0.30
  -3  -6   5    1.48    0.27
  -3   6  -5    1.22    0.20
  -3   6  -5    1.15    0.20
   3   6   5    0.96    0.22
   3   6   5    1.54    0.23
  -3   6  -5    1.26    0.26
   3   7  -5   84.78    2.23
   3   7  -5   81.83    2.18
   3  -7   5   87.18    2.18
  -3   7   5   83.22    2.17
  -3   7   5   84.63    2.25
   3  -7   5   83.83    2.19
   3   7  -5   85.68    2.19
  -3   7   5   87.19    2.02
  -3   7  -5   83.55    2.18
  -3   7  -5   80.36    2.20
  -3   7  -5   84.40    1.95
   3  -7  -5   83.52    2.31
  -3   7  -5   84.48    2.14
   3   7   5   80.16    2.21
   3   7   5   84.65    2.01
  -3  -7   5   86.36    2.15
  -3   8   5    1.32    0.28
  -3   8   5    1.32    0.29
   3  -8   5    0.29    0.33
   3   8  -5    0.98    0.26
   3   8  -5    1.10    0.23
  -3   8   5    0.73    0.29
   3   8  -5    1.19    0.26
   3   8  -5    0.95    0.28
  -3   8  -5    1.29    0.24
  -3   8  -5    0.80    0.31
   3   8   5    1.19    0.27
  -3   8  -5    0.84    0.23
   3   8   5    1.17    0.27
  -3  -8   5    1.41    0.31
   3   8   5    1.04    0.26
  -3   8  -5    1.28    0.25
   3  -8  -5    1.55    0.34
  -3   9   5   43.44    1.21
   3  -9   5   40.81    1.32
  -3   9   5   39.94    1.27
   3   9  -5   44.04    1.30
   3   9  -5   42.98    1.31
   3   9  -5   44.53    1.33
   3   9  -5   43.96    1.10
  -3   9   5   40.52    1.32
   3   9   5   41.69    1.29
  -3  -9   5   41.47    1.25
  -3   9  -5   42.71    1.13
   3   9   5   41.21    1.31
  -3   9  -5   42.92    1.26
  -3   9  -5   42.44    1.28
  -3   9  -5   40.99    1.31
   3   9   5   43.12    1.21
  -3  10   5   34.92    1.17
  -3  10   5   36.89    1.11
   3  10  -5   37.81    1.19
   3  10  -5   35.59    1.19
   3  10  -5   35.55    0.99
   3 -10   5   35.95    1.22
   3  10  -5   36.06    1.20
  -3  10   5   36.48    1.23
  -3  10  -5   35.60    1.02
  -3 -10   5   35.00    1.13
  -3  10  -5   34.84    1.19
   3  10   5   35.40    1.10
   3  10   5   35.31    1.20
   3  10   5   33.41    1.16
  -3  11   5    1.34    0.32
  -3  11   5    1.11    0.32
   3 -11   5    1.22    0.40
   3  11  -5    0.71    0.32
   3  11  -5    1.35    0.33
   3  11  -5    0.80    0.30
  -3  11   5    0.93    0.29
   3  11  -5    0.93    0.26
  -3 -11   5    1.49    0.34
  -3  11  -5    1.41    0.29
   3  11   5    1.42    0.33
   3  11   5    1.49    0.32
   3  11   5    0.81    0.31
  -3  11  -5    0.91    0.34
  -3  12   5    2.38    0.37
   3  12  -5    2.38    0.39
   3  12  -5    2.12    0.31
   3 -12   5    1.55    0.44
  -3  12   5    1.67    0.37
  -3  12   5    1.78    0.35
   3  12   5    1.74    0.36
   3  12   5    1.77    0.35
  -3  12  -5    2.15    0.32
  -3 -12   5    2.22    0.40
   3  12   5    2.37    0.38
  -3  12  -5    2.18    0.40
  -3  13   5   15.79    0.84
  -3  13   5   14.67    0.79
  -3  13   5   15.30    0.77
   3  13  -5   16.61    0.68
   3  13  -5   16.04    0.83
  -3  13  -5   15.81    0.70
   3  13   5   16.33    0.83
  -3 -13   5   15.12    0.75
   3  13   5   14.63    0.76
   3  13   5   16.28    0.81
  -3  13  -5   16.18    0.85
   3   0  -6    0.09    0.12
   3   0  -6    0.49    0.19
  -3   0   6   -0.06    0.11
  -3   0  -6   -0.13    0.12
  -3   0   6    0.20    0.13
  -3   1   6    5.43    0.31
  -3  -1  -6    6.09    0.21
  -3   1   6    6.42    0.30
  -3  -1  -6    6.09    0.29
   3   1  -6    6.37    0.29
   3   1  -6    5.92    0.36
  -3   1  -6    5.83    0.31
   3   1   6    6.16    0.20
   3  -1  -6    6.06    0.36
   3  -1  -6    6.41    0.32
  -3  -1   6    6.48    0.30
   3   1   6    6.40    0.21
  -3   1  -6    5.77    0.30
  -3  -1   6    6.40    0.30
   3   1   6    5.70    0.20
   3   2  -6  101.26    2.61
   3  -2   6   97.99    2.44
  -3  -2  -6   98.87    2.49
  -3   2   6   99.54    2.49
  -3   2   6   95.98    2.43
  -3   2   6   99.13    2.48
   3   2  -6   97.73    2.47
  -3  -2   6  100.97    2.47
   3   2   6  103.61    2.49
   3  -2  -6  101.21    2.35
  -3  -2   6   97.36    2.36
  -3   2  -6  101.01    2.44
   3  -2  -6  101.92    2.60
   3   2   6  101.89    2.41
  -3  -2   6  102.04    2.45
  -3   3   6    9.58    0.40
  -3   3   6    8.25    0.39
   3   3  -6    8.57    0.33
   3   3  -6    9.50    0.46
  -3   3   6    8.96    0.31
   3  -3   6    8.03    0.42
   3   3  -6    8.34    0.38
   3  -3   6    8.82    0.30
  -3  -3  -6    8.62    0.35
   3   3   6    9.01    0.34
  -3   3  -6    9.14    0.39
  -3  -3   6    9.33    0.38
  -3   3  -6    9.22    0.29
   3  -3  -6    8.88    0.32
   3  -3  -6    8.65    0.44
  -3  -3   6    8.70    0.42
  -3   3  -6    9.28    0.30
  -3  -3   6    8.85    0.34
  -3  -3   6    9.53    0.39
   3   3   6    8.96    0.34
  -3   4   6  156.47    3.45
  -3   4   6  149.23    3.88
   3   4  -6  158.63    3.77
   3   4  -6  158.86    3.86
  -3   4   6  156.75    3.75
   3   4  -6  157.69    4.04
   3  -4   6  158.41    3.79
  -3  -4  -6  161.18    3.90
  -3   4  -6  158.68    3.71
  -3   4  -6  158.88    3.79
   3  -4  -6  160.13    3.75
   3  -4  -6  156.81    4.01
  -3   4  -6  160.40    3.82
   3   4   6  164.27    3.90
  -3  -4   6  160.11    3.86
  -3  -4   6  159.79    3.78
  -3  -4   6  157.87    3.78
   3   4   6  155.46    3.47
   3   4   6  152.38    3.83
  -3   5   6   39.64    1.06
  -3   5   6   40.20    1.20
   3  -5   6   42.67    1.12
   3   5  -6   42.17    1.14
  -3  -5  -6   41.99    1.15
  -3   5   6   41.05    1.12
   3   5  -6   40.53    1.18
  -3   5  -6   41.68    1.10
  -3  -5   6   42.27    1.18
  -3  -5   6   42.94    1.18
  -3  -5   6   43.46    1.16
   3   5   6   40.88    1.17
   3   5   6   42.02    1.09
   3  -5  -6   42.34    1.26
  -3   5  -6   41.52    1.12
  -3   5  -6   42.56    1.19
   3   6  -6   85.02    2.10
  -3   6   6   79.54    1.92
  -3   6   6   80.61    2.16
   3  -6   6   84.80    2.08
   3  -6   6   80.72    2.12
  -3   6   6   81.46    2.07
   3   6  -6   81.30    2.14
  -3   6  -6   80.05    2.03
   3  -6  -6   83.07    2.24
   3   6   6   80.43    1.93
  -3   6  -6   79.56    2.08
  -3   6  -6   82.41    2.13
  -3  -6   6   80.39    2.09
   3   6   6   80.17    2.12
  -3   7   6    3.50    0.35
   3   7  -6    4.25    0.39
   3  -7   6    3.64    0.42
  -3   7   6    4.05    0.37
   3   7  -6    3.87    0.35
  -3   7   6    3.76    0.33
  -3  -7   6    3.67    0.38
   3   7   6    3.55    0.33
  -3   7  -6    4.05    0.35
   3   7   6    4.37    0.36
  -3   7  -6    4.71    0.34
  -3   7  -6    4.09    0.34
  -3   7  -6    4.48    0.40
   3  -7  -6    3.92    0.41
  -3   8   6    9.72    0.51
  -3   8   6   10.35    0.52
   3   8  -6   10.32    0.53
   3  -8   6   10.68    0.65
  -3   8   6   10.07    0.55
   3   8  -6   10.85    0.55
   3   8  -6   10.63    0.54
  -3   8  -6   10.90    0.49
  -3   8  -6   10.87    0.46
   3   8   6    9.60    0.51
  -3  -8   6   10.82    0.56
   3   8   6   10.65    0.51
  -3   8  -6   10.44    0.50
   3  -8  -6   10.42    0.60
  -3   8  -6   10.51    0.58
   3   8   6    9.12    0.51
   3   9  -6    0.92    0.27
  -3   9   6    1.11    0.27
   3   9  -6    0.87    0.27
   3   9  -6    1.18    0.29
  -3   9   6    0.80    0.29
  -3   9   6    0.81    0.27
   3  -9   6    1.01    0.37
  -3   9  -6    1.05    0.24
  -3   9  -6    0.87    0.28
   3   9   6    0.91    0.24
  -3  -9   6    0.98    0.31
   3   9   6    0.58    0.24
   3   9   6    1.16    0.28
  -3  10   6   46.73    1.41
  -3  10   6   47.13    1.34
   3  10  -6   46.80    1.43
  -3  10   6   46.34    1.48
   3 -10   6   45.55    1.45
   3  10  -6   43.66    1.41
   3  10  -6   45.77    1.44
   3  10   6   46.24    1.45
  -3  10  -6   45.57    1.44
  -3 -10   6   46.25    1.39
   3  10   6   46.51    1.43
   3  10   6   46.11    1.33
  -3  10  -6   45.73    1.23
  -3  11   6    1.59    0.33
  -3  11   6    0.69    0.29
   3  11  -6    1.29    0.35
  -3  11   6    1.91    0.35
   3 -11   6    1.44    0.42
   3  11   6    1.20    0.33
   3  11   6    1.65    0.35
   3  11   6    1.48    0.33
  -3  11  -6    1.39    0.36
  -3  11  -6    0.84    0.27
  -3 -11   6    1.42    0.36
  -3  12   6   27.91    1.10
  -3  12   6   30.01    1.18
   3  12  -6   31.02    1.15
   3 -12   6   31.39    1.20
  -3  12   6   32.18    1.09
  -3  12  -6   28.10    0.94
   3  12   6   32.03    1.10
  -3 -12   6   32.64    1.09
   3  12   6   31.67    1.14
   3  12   6   29.98    1.14
  -3  12  -6   29.93    1.16
  -3  13   6   11.54    0.69
   3  13  -6   10.42    0.70
   3 -13   6    8.84    0.78
  -3  13   6   11.18    0.72
  -3  13   6   10.92    0.67
  -3 -13   6   10.43    0.69
  -3  13  -6   10.68    0.73
   3  13   6   10.86    0.70
   3  13   6   11.36    0.69
   3  13   6    9.78    0.68
  -3  13  -6   10.42    0.58
  -3   0  -7    0.04    0.14
  -3   0   7    0.06    0.14
  -3   0   7   -0.04    0.18
  -3   0   7   -0.14    0.12
   3   0  -7    0.06    0.14
   3   0  -7   -0.10    0.18
  -3   1   7  138.74    3.29
  -3  -1  -7  135.57    3.40
   3   1  -7  134.58    3.33
  -3  -1  -7  133.58    3.23
  -3   1   7  136.08    3.35
   3   1  -7  135.12    3.50
  -3   1   7  138.64    3.34
   3  -1   7  136.18    3.28
  -3  -1   7  139.47    3.34
  -3  -1   7  141.85    3.33
   3   1   7  138.61    3.23
   3   1   7  138.93    3.23
   3  -1  -7  139.79    3.35
   3   1   7  139.47    3.17
   3  -1  -7  136.28    3.50
  -3   1  -7  132.46    3.43
  -3   1  -7  131.91    3.28
  -3   2   7    1.13    0.18
   3   2  -7    1.02    0.17
   3   2  -7    1.11    0.24
  -3   2   7    1.04    0.16
  -3   2   7    1.13    0.22
   3  -2   7    1.07    0.23
  -3  -2  -7    1.02    0.16
  -3  -2   7    1.56    0.24
  -3  -2   7    1.21    0.11
  -3   2  -7    1.37    0.18
  -3  -2   7    1.06    0.16
   3   2   7    1.13    0.13
   3  -2  -7    1.81    0.25
   3   3  -7   51.82    1.39
  -3   3   7   49.32    1.39
  -3   3   7   50.92    1.42
  -3   3   7   53.53    1.42
   3   3  -7   51.19    1.51
   3  -3   7   53.24    1.29
   3  -3   7   51.07    1.43
  -3  -3  -7   53.21    1.39
   3   3  -7   54.03    1.31
   3   3   7   52.59    1.26
  -3  -3   7   51.69    1.30
   3  -3  -7   55.31    1.51
  -3  -3   7   51.18    1.36
   3   3   7   54.80    1.38
  -3  -3   7   53.09    1.39
   3  -3  -7   53.46    1.29
  -3   3  -7   52.81    1.29
  -3  -3   7   52.36    1.42
  -3   3  -7   53.24    1.39
   3   3   7   51.78    1.35
  -3   4   7   25.25    0.70
   3   4  -7   23.45    0.72
  -3  -4  -7   23.72    0.74
   3   4  -7   24.40    0.76
  -3   4   7   24.40    0.79
   3  -4   7   25.20    0.69
  -3   4  -7   24.40    0.68
  -3   4  -7   24.01    0.67
   3  -4  -7   24.74    0.70
  -3  -4   7   25.87    0.82
  -3  -4   7   24.13    0.75
   3   4   7   25.12    0.71
   3  -4  -7   24.17    0.86
  -3   4  -7   24.70    0.78
   3   4   7   24.57    0.74
  -3  -4   7   25.30    0.77
  -3   5   7   46.96    1.24
  -3   5   7   46.21    1.19
   3  -5   7   49.28    1.24
  -3  -5  -7   45.69    1.28
  -3   5   7   46.01    1.34
   3   5  -7   47.43    1.26
   3   5  -7   47.18    1.31
  -3   5  -7   45.89    1.31
  -3  -5   7   48.34    1.33
   3   5   7   46.04    1.29
   3   5   7   45.08    1.19
  -3  -5   7   47.97    1.28
   3  -5  -7   45.46    1.40
  -3   5  -7   45.96    1.23
  -3  -5   7   48.79    1.31
  -3   5  -7   46.09    1.21
  -3   6   7    7.03    0.43
  -3   6   7    6.59    0.43
   3   6  -7    5.84    0.41
   3   6  -7    6.28    0.51
  -3   6   7    6.66    0.38
   3  -6   7    6.75    0.38
   3   6  -7    5.94    0.41
  -3   6  -7    6.35    0.45
   3   6   7    7.63    0.42
  -3   6  -7    6.55    0.36
   3  -6  -7    6.67    0.52
   3   6   7    7.21    0.43
  -3   6  -7    6.79    0.37
  -3  -6   7    6.69    0.47
  -3   7   7   93.07    2.19
   3   7  -7   93.63    2.37
   3   7  -7   93.65    2.43
  -3   7   7   87.55    2.44
  -3   7   7   93.80    2.35
   3  -7   7   91.42    2.41
  -3   7  -7   92.48    2.31
  -3   7  -7   89.95    2.41
   3   7   7   90.92    2.41
   3   7   7   92.35    2.19
  -3  -7   7   93.15    2.38
   3  -7  -7   92.13    2.52
  -3   7  -7   91.08    2.08
   3   8  -7   20.08    0.75
   3   8  -7   19.21    0.74
   3  -8   7   18.99    0.80
  -3   8   7   18.28    0.69
  -3   8   7   18.37    0.76
  -3   8   7   17.89    0.71
   3   8   7   18.71    0.70
   3  -8  -7   19.16    0.80
  -3  -8   7   18.04    0.75
  -3   8  -7   19.58    0.60
  -3   8  -7   18.18    0.75
   3   8   7   18.02    0.72
  -3   9   7   22.47    0.83
  -3   9   7   23.02    0.83
   3  -9   7   22.73    0.95
  -3   9   7   22.20    0.88
   3   9  -7   24.35    0.88
  -3   9  -7   23.20    0.71
   3   9   7   21.70    0.84
   3   9   7   22.09    0.86
  -3   9  -7   24.25    0.91
  -3  -9   7   22.47    0.86
   3  -9  -7   25.26    0.95
   3   9   7   22.72    0.83
  -3  10   7   15.04    0.67
  -3  10   7   12.93    0.64
  -3  10   7   13.90    0.69
   3 -10   7   13.83    0.75
   3  10  -7   15.27    0.70
   3  10   7   14.77    0.69
  -3 -10   7   13.30    0.70
   3  10   7   14.61    0.69
   3  10   7   13.30    0.66
  -3  10  -7   14.16    0.72
  -3  11   7    0.12    0.25
   3  11  -7    0.11    0.28
  -3  11   7    0.41    0.30
  -3  11   7    0.46    0.29
   3 -11   7   -0.12    0.37
   3  11   7    0.53    0.28
  -3  11  -7    0.25    0.30
   3  11   7    0.27    0.27
  -3 -11   7    0.11    0.33
   3  11   7    0.16    0.29
   3  12  -7    5.40    0.53
   3 -12   7    6.15    0.60
  -3  12   7    5.66    0.52
  -3  12   7    6.45    0.53
   3  12   7    5.90    0.54
  -3 -12   7    5.51    0.53
   3  12   7    5.55    0.54
  -3  12  -7    6.63    0.56
   3  12   7    6.48    0.55
   3   0  -8   -0.09    0.20
  -3   0  -8    0.22    0.14
   3   0   8    0.03    0.20
  -3   0   8   -0.14    0.20
  -3   0   8   -0.10    0.13
   3   0  -8    0.16    0.15
  -3   0  -8   -0.11    0.16
  -3   0   8    0.10    0.14
  -3   1   8   59.02    1.53
  -3  -1  -8   59.74    1.57
  -3   1   8   57.40    1.54
  -3   1   8   56.78    1.56
   3   1  -8   58.86    1.53
   3  -1   8   57.38    1.55
   3   1  -8   60.07    1.66
  -3  -1   8   57.54    1.53
  -3  -1   8   60.25    1.52
  -3   1  -8   57.20    1.59
   3   1   8   60.99    1.41
  -3   1  -8   57.16    1.49
   3   1   8   58.44    1.52
   3  -1  -8   59.63    1.66
   3  -2   8   60.03    1.59
  -3   2   8   60.75    1.57
   3   2  -8   57.57    1.55
   3   2  -8   58.27    1.69
  -3   2   8   58.06    1.57
  -3  -2  -8   58.34    1.57
  -3   2   8   59.29    1.58
  -3   2  -8   58.66    1.53
  -3   2  -8   60.06    1.64
  -3  -2   8   58.70    1.55
  -3  -2   8   63.15    1.56
   3   2   8   59.87    1.47
   3   2   8   58.42    1.52
   3  -2  -8   58.29    1.68
   3   2   8   60.91    1.47
   3   3  -8    2.66    0.24
   3  -3   8    2.98    0.33
  -3   3   8    2.08    0.25
  -3   3   8    2.39    0.24
  -3   3   8    2.41    0.29
   3   3  -8    2.04    0.30
  -3  -3  -8    2.19    0.24
   3  -3   8    2.77    0.15
   3  -3  -8    2.20    0.16
  -3  -3   8    2.74    0.21
  -3   3  -8    2.05    0.24
   3  -3  -8    1.92    0.31
  -3  -3   8    2.31    0.22
  -3  -3   8    2.40    0.22
   3   3   8    2.78    0.23
  -3  -4  -8   38.29    1.09
  -3   4   8   37.77    1.13
   3   4  -8   37.95    1.25
   3   4  -8   38.36    1.10
   3  -4   8   39.65    1.00
  -3   4   8   38.73    1.00
   3   4  -8   39.35    1.04
  -3   4   8   38.94    1.13
  -3  -4   8   39.02    1.17
  -3   4  -8   38.48    1.11
  -3  -4   8   39.48    1.08
   3  -4  -8   39.98    1.02
   3   4   8   39.26    1.02
   3  -4  -8   40.13    1.23
  -3  -4   8   39.42    1.10
   3   4   8   37.31    1.06
  -3   4  -8   37.95    1.00
  -3   5   8   11.86    0.54
   3  -5   8   11.10    0.41
  -3   5   8   10.52    0.51
   3   5  -8   10.81    0.46
   3   5  -8   11.23    0.51
  -3   5   8   10.80    0.47
   3   5  -8   10.66    0.61
  -3  -5  -8   10.09    0.49
  -3  -5   8    9.35    0.57
   3  -5  -8   10.57    0.60
   3   5   8   10.57    0.48
  -3   5  -8   11.26    0.52
   3   5   8   10.98    0.47
  -3   5  -8   11.09    0.42
  -3   6   8   22.66    0.71
   3  -6   8   21.38    0.84
   3   6  -8   22.02    0.90
  -3   6   8   22.75    0.81
   3   6  -8   22.85    0.75
  -3  -6  -8   21.62    0.74
   3   6  -8   22.34    0.78
  -3   6  -8   22.62    0.82
   3  -6  -8   21.90    0.87
   3   6   8   22.13    0.76
   3   6   8   22.94    0.74
  -3  -6   8   21.84    0.82
   3   7  -8    1.49    0.25
   3   7  -8    1.59    0.26
   3  -7   8    0.65    0.32
  -3   7   8    1.63    0.27
  -3   7   8    1.02    0.26
   3   7  -8    1.48    0.33
  -3  -7   8    1.67    0.31
   3   7   8    1.37    0.25
   3   7   8    1.23    0.23
  -3   7  -8    1.73    0.30
   3  -7  -8    1.31    0.32
   3   8  -8   14.50    0.73
   3   8  -8   14.48    0.63
  -3   8   8   14.85    0.68
  -3   8   8   15.59    0.64
   3  -8   8   15.50    0.74
  -3  -8   8   15.06    0.69
   3  -8  -8   16.32    0.74
  -3   8  -8   16.05    0.69
   3   8   8   15.45    0.63
   3   8   8   15.22    0.66
   3  -9   8    0.61    0.36
  -3   9   8    0.49    0.27
  -3   9   8    0.52    0.28
   3   9  -8    0.89    0.28
  -3  -9   8    0.66    0.34
  -3   9  -8    0.34    0.29
   3  -9  -8    0.50    0.31
   3   9   8    0.54    0.30
   3   9   8    0.24    0.24
   3   9   8    0.49    0.24
  -3  10   8   66.14    1.78
   3 -10   8   68.81    1.97
   3  10  -8   67.39    1.91
  -3  10   8   66.83    1.99
   3  10   8   67.44    1.96
  -3  10  -8   66.61    1.94
   3  10   8   66.16    1.90
   3  10   8   65.50    1.78
  -3 -10   8   65.55    1.90
  -3  11   8    3.41    0.42
   3 -11   8    3.30    0.51
   3  11  -8    3.42    0.43
  -3  11   8    2.74    0.42
   3  11   8    3.83    0.43
   3  11   8    3.45    0.45
  -3  11  -8    3.24    0.45
   3  11   8    4.03    0.45
  -3 -11   8    4.29    0.50
  -3  12   8   38.38    1.24
   3  12  -8   37.50    1.32
  -3  12   8   36.59    1.36
   3 -12   8   37.31    1.39
   3  12   8   38.10    1.35
  -3 -12   8   36.84    1.30
   3  12   8   36.46    1.25
  -3  12  -8   38.32    1.35
   3  12   8   34.93    1.29
  -3   0   9   -0.12    0.15
   3   0   9   -0.17    0.22
  -3   0   9   -0.23    0.24
  -3   0   9   -0.20    0.15
   3   0  -9   -0.09    0.16
   3   0  -9    0.07    0.26
  -3   0  -9    0.29    0.17
  -3   0  -9    0.09    0.20
  -3   1   9  125.29    3.00
   3   1  -9  120.58    3.19
   3  -1   9  124.03    2.99
  -3   1   9  118.22    3.00
  -3  -1  -9  122.44    3.08
   3   1  -9  114.95    2.98
  -3   1   9  120.97    2.99
   3  -1  -9  119.44    3.17
  -3  -1   9  124.12    2.98
   3   1   9  120.81    2.95
  -3  -1   9  121.19    2.99
  -3   1  -9  121.13    3.11
  -3   1  -9  118.30    2.93
  -3   2   9    8.29    0.41
  -3   2   9    7.85    0.40
   3   2  -9    8.04    0.50
   3   2  -9    7.86    0.39
   3  -2   9    7.59    0.49
  -3   2   9    7.81    0.47
  -3  -2  -9    8.98    0.42
  -3  -2   9    7.32    0.40
  -3   2  -9    8.16    0.40
   3  -2  -9    7.73    0.52
   3   2   9    7.96    0.29
   3   2   9    7.94    0.43
   3   2   9    8.90    0.30
  -3  -2   9    7.64    0.38
  -3   2  -9    8.47    0.47
   3   2   9    8.12    0.30
   3  -3   9    2.23    0.34
  -3   3   9    2.05    0.25
   3   3  -9    1.91    0.34
  -3  -3  -9    2.13    0.25
  -3   3   9    2.17    0.26
  -3   3   9    2.39    0.32
   3   3  -9    1.83    0.23
   3  -3  -9    1.89    0.33
   3  -3  -9    1.95    0.17
  -3   3  -9    1.56    0.29
  -3  -3   9    2.22    0.23
   3   3   9    2.11    0.26
   3   3   9    2.30    0.20
  -3   3  -9    2.09    0.25
  -3  -3   9    2.33    0.22
   3   3   9    2.38    0.19
  -3  -4  -9    5.75    0.39
   3   4  -9    5.54    0.31
   3   4  -9    5.47    0.50
  -3   4   9    5.07    0.41
  -3   4   9    4.63    0.36
  -3   4   9    4.81    0.32
   3   4  -9    5.24    0.35
   3  -4   9    5.45    0.24
   3  -4   9    4.24    0.42
  -3  -4   9    4.40    0.42
  -3   4  -9    5.00    0.39
   3   4   9    4.66    0.35
   3  -4  -9    5.30    0.49
   3   4   9    5.18    0.31
   3  -5   9   29.78    1.02
   3   5  -9   30.44    0.95
  -3   5   9   30.67    0.99
   3   5  -9   32.19    0.90
  -3   5   9   31.15    0.88
  -3  -5  -9   31.91    0.95
   3   5  -9   30.94    1.09
  -3   5   9   32.76    1.00
   3   5   9   29.38    0.92
   3   5   9   30.54    0.90
   3   5   9   30.64    0.89
   3  -5  -9   32.23    1.09
  -3  -5   9   30.74    1.03
  -3   5  -9   30.75    0.96
   3   6  -9    3.19    0.39
  -3   6   9    3.35    0.36
  -3   6   9    3.57    0.32
  -3   6   9    3.46    0.34
  -3  -6  -9    3.46    0.31
   3  -6   9    3.31    0.40
   3   6  -9    3.37    0.30
  -3   6  -9    3.44    0.33
   3   6   9    4.09    0.34
  -3  -6   9    3.27    0.39
   3  -6  -9    2.98    0.39
   3   6   9    3.24    0.30
  -3   7   9   50.42    1.33
   3  -7   9   49.47    1.51
  -3   7   9   47.29    1.42
   3   7  -9   49.75    1.40
  -3   7   9   50.14    1.49
   3  -7  -9   49.97    1.55
  -3   7  -9   48.88    1.44
  -3  -7   9   51.35    1.49
   3   7   9   50.84    1.34
   3   7   9   48.96    1.43
   3   8  -9    1.65    0.29
   3  -8   9    1.32    0.38
   3   8  -9    1.25    0.33
  -3   8   9    1.13    0.27
  -3   8   9    0.80    0.31
  -3   8   9    1.26    0.28
  -3   8  -9    1.15    0.31
   3  -8  -9    0.83    0.35
   3   8   9    1.04    0.26
   3   8   9    1.33    0.28
  -3  -8   9    1.63    0.37
   3   8   9    1.02    0.28
   3   9  -9   23.03    1.03
  -3   9   9   23.95    0.95
   3  -9   9   25.85    1.02
   3   9  -9   25.10    0.90
  -3   9   9   23.64    0.85
   3   9   9   24.28    0.88
   3   9   9   23.83    0.89
   3  -9  -9   26.20    1.00
   3   9   9   24.04    0.91
  -3  -9   9   26.56    0.98
  -3   9  -9   24.66    0.94
   3  10  -9   24.73    1.10
   3 -10   9   27.20    1.08
   3  10  -9   26.47    0.98
  -3  10   9   25.78    1.03
  -3  10   9   26.70    0.94
   3  10   9   26.95    0.98
  -3  10  -9   25.03    1.01
   3  10   9   25.67    0.93
  -3 -10   9   26.66    1.03
   3  10   9   25.55    0.98
   3  11  -9    0.35    0.35
   3 -11   9   -0.11    0.42
  -3  11   9    0.03    0.28
  -3  11   9    0.26    0.32
   3  11  -9    0.42    0.30
  -3  11  -9    0.13    0.31
   3  11   9    0.15    0.26
  -3 -11   9    0.25    0.38
   3  11   9    0.15    0.25
   3  11   9    0.07    0.32
   3   0 -10   -0.07    0.17
   3   0  10   -0.08    0.23
   3   0 -10    0.11    0.28
  -3   0  10    0.09    0.17
  -3   0 -10   -0.10    0.16
  -3   0  10   -0.22    0.26
  -3   0 -10   -0.14    0.22
   3  -1  10    1.45    0.32
  -3   1  10    1.65    0.23
  -3  -1 -10    1.51    0.26
   3   1 -10    1.76    0.34
   3   1 -10    1.51    0.22
  -3   1  10    1.67    0.31
   3  -1 -10    1.57    0.32
  -3   1 -10    1.43    0.28
   3   1  10    2.12    0.31
  -3  -1  10    1.77    0.32
  -3   1 -10    1.60    0.22
  -3  -1  10    1.48    0.21
   3   2 -10   78.26    2.25
  -3   2  10   80.51    2.09
   3  -2  10   79.29    2.13
  -3  -2 -10   79.66    2.13
  -3   2  10   78.03    2.12
   3  -2 -10   79.11    2.24
  -3   2 -10   79.96    2.03
  -3  -2  10   77.19    2.13
   3   2  10   82.74    1.92
  -3   2 -10   82.59    2.20
   3   2  10   84.20    1.96
   3   2  10   84.56    2.08
  -3  -2  10   79.64    2.06
   3   2  10   82.65    1.96
  -3   3  10    3.97    0.34
  -3   3  10    4.25    0.39
   3  -3  10    3.33    0.39
   3   3 -10    3.08    0.38
  -3  -3 -10    3.99    0.36
  -3   3  10    3.64    0.29
   3   3  10    4.16    0.25
  -3   3 -10    4.03    0.38
   3  -3 -10    4.00    0.42
   3   3  10    4.12    0.36
  -3  -3  10    3.54    0.38
  -3  -3  10    4.50    0.31
  -3   3 -10    4.13    0.34
  -3   4  10   69.38    1.60
  -3   4  10   64.50    1.82
  -3   4  10   66.15    1.82
  -3  -4 -10   67.51    1.82
   3   4 -10   68.11    1.99
   3  -4  10   66.37    1.86
  -3   4 -10   70.32    1.78
   3   4  10   70.37    1.75
  -3   4 -10   66.83    1.93
  -3  -4  10   64.17    1.85
   3   4  10   68.03    1.74
   3  -4 -10   66.42    1.94
   3   5 -10   15.98    0.56
  -3   5  10   15.83    0.65
   3   5 -10   15.29    0.74
  -3  -5 -10   16.94    0.63
  -3   5  10   17.14    0.59
  -3   5  10   17.36    0.70
   3  -5  10   16.19    0.73
   3   5  10   15.91    0.60
  -3   5 -10   17.66    0.65
   3   5  10   17.19    0.60
  -3   5 -10   15.49    0.74
   3  -5 -10   16.46    0.74
   3   5  10   17.33    0.61
  -3  -5  10   16.68    0.72
   3   6 -10   45.29    1.23
  -3   6  10   45.68    1.19
  -3   6  10   42.80    1.33
   3   6 -10   42.55    1.44
   3  -6  10   42.40    1.38
  -3   6  10   44.84    1.31
  -3  -6  10   43.59    1.36
   3   6  10   42.29    1.19
   3  -6 -10   43.52    1.40
  -3   6 -10   44.96    1.30
   3   6  10   44.16    1.27
   3   7 -10    4.73    0.48
   3   7 -10    5.22    0.40
   3  -7  10    3.94    0.46
  -3   7  10    4.54    0.43
  -3   7  10    3.82    0.36
  -3   7  10    4.50    0.42
   3   7  10    4.56    0.36
  -3  -7  10    3.90    0.45
  -3   7 -10    5.71    0.46
   3  -7 -10    4.75    0.47
   3   7  10    4.60    0.38
  -3   8  10    2.72    0.36
   3  -8  10    2.85    0.44
  -3   8  10    2.53    0.35
  -3   8  10    2.95    0.35
   3   8 -10    2.53    0.31
   3   8 -10    2.19    0.41
   3  -8 -10    1.95    0.40
   3   8  10    2.66    0.33
  -3  -8  10    3.20    0.44
   3   8  10    2.38    0.31
   3   8  10    2.68    0.31
  -3   8 -10    2.16    0.33
   3   9 -10    0.67    0.27
   3   9 -10    0.21    0.34
  -3   9  10    0.29    0.29
  -3   9  10    0.10    0.26
  -3   9  10    0.07    0.26
   3  -9  10    0.33    0.40
  -3   9 -10    0.23    0.27
   3   9  10    0.36    0.29
   3   9  10    0.48    0.24
  -3  -9  10    0.22    0.33
   3   9  10    0.33    0.24
   3  -9 -10    0.46    0.31
   3 -10  10   23.00    1.00
  -3  10  10   20.94    0.92
   3  10 -10   22.27    1.04
  -3  10  10   21.28    0.85
   3  10  10   22.08    0.89
  -3  10 -10   21.41    0.90
   3  10  10   22.56    0.88
   3  10  10   20.65    0.86
   3 -10 -10   21.61    0.96
  -3 -10  10   20.17    0.94
   3  11 -10    0.86    0.40
  -3  11  10    0.63    0.32
  -3  11  10    0.53    0.32
   3 -11  10    0.92    0.46
  -3 -11  10    0.52    0.40
  -3  11 -10    0.24    0.33
   3  11  10    0.46    0.34
   3  11  10    0.94    0.32
   3  11  10    0.30    0.29
   3   0  11    0.01    0.24
  -3   0  11   -0.24    0.24
   3   0 -11   -0.07    0.28
  -3   0  11   -0.23    0.16
  -3   0 -11   -0.13    0.16
  -3   0 -11   -0.04    0.23
   3   1 -11  106.05    2.88
  -3  -1 -11  109.18    2.77
  -3  -1 -11  104.20    2.58
   3  -1  11  104.14    2.69
  -3   1  11  105.03    2.71
  -3   1  11  105.70    2.66
  -3   1 -11  106.95    2.79
  -3  -1  11  105.71    2.65
   3   1  11  103.23    2.66
  -3   1 -11  105.47    2.59
  -3  -1  11  103.45    2.72
   3  -1 -11  106.13    2.87
  -3   2  11    4.18    0.40
  -3  -2 -11    4.26    0.37
   3   2 -11    3.95    0.42
   3  -2  11    4.27    0.41
  -3   2  11    3.99    0.32
   3  -2 -11    4.16    0.42
   3   2  11    4.35    0.19
  -3  -2  11    3.67    0.39
  -3   2 -11    4.02    0.37
  -3  -2  11    4.27    0.30
  -3   2 -11    3.73    0.31
   3   2  11    3.96    0.36
  -3  -3 -11   11.41    0.54
  -3   3  11   11.60    0.57
   3   3 -11   10.69    0.63
   3  -3  11   11.32    0.59
  -3   3  11   11.08    0.50
  -3   3 -11   11.41    0.49
  -3  -3  11   10.35    0.60
   3  -3 -11   11.08    0.62
   3   3  11   11.52    0.53
   3   3  11   11.58    0.40
  -3  -3  11   11.74    0.47
  -3   3 -11   10.98    0.58
   3   3  11   11.89    0.39
   3   4 -11    2.83    0.39
   3  -4  11    3.70    0.41
  -3   4  11    3.68    0.38
  -3  -4 -11    3.05    0.32
  -3   4  11    3.27    0.31
  -3   4 -11    3.30    0.38
   3  -4 -11    3.29    0.40
   3   4  11    3.57    0.25
  -3  -4  11    3.50    0.29
   3   4  11    3.84    0.26
  -3   4 -11    3.42    0.31
  -3  -4  11    3.56    0.41
   3   4  11    3.75    0.34
   3  -5  11    9.94    0.61
  -3   5  11   11.53    0.47
  -3   5  11   10.44    0.53
   3   5 -11    9.97    0.62
  -3   5  11   10.79    0.58
   3   5  11   10.05    0.50
  -3   5 -11   10.76    0.52
  -3  -5  11   10.32    0.60
  -3   5 -11    9.77    0.60
   3   5  11   11.09    0.44
   3  -5 -11   10.06    0.62
   3   5  11   10.42    0.45
  -3   6  11    0.49    0.24
  -3   6  11    0.87    0.30
  -3   6  11    0.77    0.23
   3   6 -11    0.36    0.29
   3  -6  11    0.18    0.34
   3  -6 -11    0.33    0.31
  -3  -6  11    0.61    0.33
   3   6  11    0.61    0.20
  -3   6 -11    0.50    0.25
  -3   6 -11    0.58    0.29
   3   6  11    0.28    0.18
  -3   7  11   41.10    1.25
  -3   7  11   38.83    1.26
  -3   7  11   38.29    1.12
   3   7 -11   37.52    1.39
   3  -7  11   38.54    1.32
   3   7  11   38.83    1.17
   3   7  11   39.67    1.20
  -3   7 -11   39.90    1.23
  -3  -7  11   39.23    1.31
   3   7  11   41.98    1.16
   3  -7 -11   39.34    1.34
  -3   8  11    4.86    0.42
  -3   8  11    5.38    0.47
   3  -8  11    6.25    0.57
   3   8 -11    5.33    0.56
  -3   8  11    5.30    0.46
  -3   8 -11    5.70    0.49
   3   8  11    5.44    0.41
   3   8  11    4.72    0.42
   3   8  11    4.90    0.41
  -3  -8  11    6.15    0.54
   3  -8 -11    5.82    0.54
   3  -9  11   17.33    0.89
   3   9 -11   18.25    0.94
  -3   9  11   18.10    0.77
  -3   9  11   18.85    0.84
  -3   9  11   19.40    0.77
   3  -9 -11   18.55    0.87
  -3   9 -11   18.34    0.81
   3   9  11   18.21    0.78
   3   9  11   19.34    0.78
   3   9  11   18.54    0.77
  -3  -9  11   17.78    0.86
   3 -10  11   14.21    0.85
   3  10 -11   14.36    0.87
  -3  10  11   13.87    0.70
  -3  10  11   14.25    0.75
   3  10  11   15.43    0.70
   3 -10 -11   12.58    0.76
   3  10  11   14.50    0.71
   3  10  11   14.40    0.72
  -3  10 -11   13.77    0.76
  -3 -10  11   14.90    0.83
   3   0  12   -0.28    0.25
   3   0 -12   -0.12    0.26
  -3   0  12   -0.09    0.16
  -3   0  12   -0.07    0.25
  -3   0 -12   -0.17    0.22
   3   1 -12    9.16    0.59
  -3   1  12    8.49    0.53
  -3  -1 -12    8.79    0.50
  -3   1  12    8.75    0.42
   3  -1  12    7.77    0.51
  -3  -1  12    9.39    0.41
   3   1  12    8.49    0.52
  -3   1 -12    9.21    0.51
   3  -1 -12    9.55    0.59
  -3  -1  12    9.59    0.56
   3   2 -12   30.08    1.13
  -3   2  12   28.97    1.04
  -3   2  12   31.43    0.95
  -3  -2 -12   30.60    1.00
   3  -2  12   30.54    1.06
   3  -2 -12   31.27    1.12
  -3   2 -12   32.76    1.07
  -3  -2  12   30.80    1.07
  -3  -2  12   30.95    0.92
   3   2  12   32.56    1.03
  -3   3  12   13.55    0.63
   3   3 -12   11.89    0.70
  -3  -3 -12   13.03    0.60
  -3   3  12   11.76    0.53
   3  -3  12   12.32    0.65
   3   3  12   12.68    0.41
   3   3  12   12.79    0.59
   3  -3 -12   12.42    0.67
  -3   3 -12   12.97    0.66
   3   3  12   13.05    0.41
  -3  -3  12   12.75    0.50
  -3  -3  12   11.46    0.66
  -3   4  12   56.16    1.63
  -3   4  12   55.57    1.58
   3   4 -12   58.87    1.79
   3  -4  12   53.51    1.66
  -3   4 -12   58.30    1.73
  -3  -4  12   52.92    1.66
   3   4  12   55.64    1.47
   3   4  12   56.18    1.56
  -3  -4  12   54.77    1.53
   3   4  12   56.92    1.44
   3  -4 -12   60.63    1.76
   3  -5  12    2.53    0.41
   3   5 -12    2.32    0.41
  -3   5  12    3.11    0.37
  -3   5  12    2.20    0.30
  -3  -5  12    2.73    0.27
   3   5  12    3.33    0.28
   3   5  12    2.73    0.25
  -3  -5  12    2.36    0.39
   3  -5 -12    2.41    0.40
  -3   5 -12    1.97    0.37
   3   6 -12   14.62    0.77
   3  -6  12   14.23    0.75
  -3   6  12   14.00    0.57
  -3   6  12   13.59    0.67
  -3   6  12   13.96    0.63
   3  -6 -12   15.98    0.76
   3   6  12   14.71    0.57
  -3   6 -12   14.00    0.75
  -3  -6  12   13.57    0.75
   3   6  12   14.21    0.56
   3  -7  12    3.61    0.48
  -3   7  12    3.78    0.39
   3   7 -12    3.82    0.50
  -3   7  12    4.20    0.43
  -3   7  12    4.14    0.37
   3   7  12    3.86    0.34
  -3   7 -12    4.09    0.48
   3   7  12    3.91    0.34
  -3  -7  12    3.93    0.48
   3  -7 -12    4.06    0.49
  -3   8  12    6.75    0.50
   3  -8  12    5.74    0.59
   3   8 -12    6.93    0.64
  -3   8  12    5.91    0.50
  -3   8  12    7.16    0.54
   3   8  12    5.81    0.43
   3   8  12    6.78    0.51
   3  -8 -12    6.68    0.57
  -3   8 -12    5.87    0.57
  -3  -8  12    5.59    0.57
   3   8  12    7.13    0.46
  -3   9  12    0.60    0.31
  -3   9  12    0.59    0.33
   3   9 -12    0.38    0.38
  -3   9  12    0.47    0.28
   3  -9  12    0.43    0.45
  -3  -9  12    0.60    0.39
   3   9  12   -0.05    0.24
  -3   9 -12    0.54    0.34
   3   9  12    0.15    0.24
   3   9  12   -0.15    0.29
   3   0 -13   -0.22    0.29
  -3   0  13    0.28    0.17
  -3   0 -13    0.01    0.25
   3   0  13    0.00    0.26
  -3   0  13    0.14    0.30
  -3   1  13   34.28    1.00
   3  -1  13   32.81    1.12
  -3   1  13   32.39    1.14
  -3  -1 -13   33.39    1.10
   3   1 -13   32.06    1.19
  -3  -1  13   32.71    0.97
  -3   1 -13   33.57    1.13
   3   1  13   33.61    1.10
   3  -1 -13   33.91    1.20
  -3  -1  13   32.61    1.15
  -3   2  13    5.64    0.47
   3   2 -13    4.68    0.49
   3  -2  13    3.75    0.45
  -3   2  13    5.16    0.35
  -3   2 -13    5.53    0.48
  -3  -2  13    4.55    0.47
  -3  -2  13    4.77    0.32
   3  -2 -13    5.35    0.50
   3   2  13    4.87    0.43
   3  -3  13    0.75    0.33
   3   3 -13    1.16    0.37
  -3   3  13    0.98    0.33
  -3   3  13    1.30    0.23
   3   3  13    1.07    0.29
  -3   3 -13    1.46    0.33
  -3  -3  13    1.12    0.20
   3  -3 -13    1.88    0.39
  -3  -3  13    1.59    0.37
   3  -4  13    7.07    0.58
   3   4 -13    6.47    0.55
  -3   4  13    6.47    0.43
  -3   4  13    6.85    0.52
  -3  -4  13    6.76    0.56
   3   4  13    6.29    0.48
   3  -4 -13    6.57    0.56
  -3   4 -13    6.60    0.53
   3   4  13    7.19    0.31
   3   4  13    6.88    0.32
  -3  -4  13    6.55    0.38
   3  -5  13   24.24    0.98
   3   5 -13   22.85    1.02
  -3   5  13   23.89    0.92
  -3   5  13   23.80    0.85
   3   5  13   23.82    0.73
   3  -5 -13   23.53    0.98
  -3  -5  13   23.63    0.78
  -3   5 -13   22.80    0.97
  -3  -5  13   22.15    0.95
   3   5  13   23.34    0.74
   3   6 -13    7.93    0.62
   3  -6  13    6.79    0.60
  -3   6  13    7.09    0.54
  -3   6  13    8.42    0.51
  -3  -6  13    7.21    0.60
   3   6  13    7.99    0.43
   3   6  13    7.83    0.41
   3  -6 -13    8.11    0.64
  -3  -6  13    7.71    0.43
  -3   6 -13    7.42    0.60
  -3   7  13   31.45    1.11
   3  -7  13   30.31    1.21
   3   7 -13   32.97    1.30
  -3   7  13   31.36    1.13
   3  -7 -13   33.31    1.22
  -3   7 -13   35.41    1.29
   3   7  13   32.08    1.01
   3   7  13   32.48    1.04
  -3  -7  13   32.58    1.24
   3  -8  13    0.37    0.42
  -3   8  13    0.81    0.33
   3   8 -13    0.42    0.39
  -3   8  13    0.92    0.30
  -3   8  13    0.96    0.31
   3   8  13    0.43    0.24
  -3   8 -13    0.86    0.36
   3   8  13    0.75    0.25
  -3  -8  13    0.37    0.40
   3   0 -14   -0.11    0.31
  -3   0  14   -0.18    0.29
   3   0  14    0.24    0.30
  -3   0  14    0.25    0.16
   3   1 -14    3.95    0.46
  -3   1  14    4.42    0.47
   3  -1  14    3.39    0.45
  -3   1  14    4.39    0.32
  -3  -1  14    3.60    0.44
  -3  -1  14    4.48    0.30
  -3   1 -14    4.03    0.42
   3  -1 -14    3.58    0.45
   3   1  14    3.66    0.42
  -3   2  14   19.13    0.84
   3  -2  14   17.11    0.80
  -3   2  14   18.68    0.67
   3   2 -14   17.31    0.84
  -3   2 -14   17.30    0.79
   3   2  14   18.08    0.78
  -3  -2  14   19.26    0.63
  -3  -2  14   18.34    0.86
   3  -2 -14   18.17    0.86
   3  -3  14    1.79    0.41
   3   3 -14    1.35    0.40
  -3   3  14    2.14    0.27
  -3   3  14    2.23    0.38
  -3   3 -14    2.46    0.38
  -3  -3  14    1.49    0.38
  -3  -3  14    1.68    0.22
   3  -3 -14    1.63    0.40
   3   3  14    2.27    0.36
   3   4 -14   39.06    1.41
  -3   4  14   37.25    1.28
  -3   4  14   38.51    1.18
   3  -4  14   37.87    1.34
   3  -4 -14   40.61    1.38
  -3  -4  14   34.81    1.30
   3   4  14   39.17    1.23
  -3   4 -14   39.35    1.36
  -3  -4  14   38.02    1.11
  -3   5  14    3.57    0.35
  -3   5  14    2.59    0.42
   3   5 -14    2.94    0.47
   3  -5  14    2.74    0.47
   3  -5 -14    2.43    0.44
  -3  -5  14    3.41    0.48
  -3   5 -14    3.21    0.44
  -3  -5  14    2.95    0.28
   3  -6  14    8.23    0.70
  -3   6  14    9.38    0.61
  -3   6  14    8.55    0.52
   3   6 -14    9.23    0.70
   3   6  14    7.91    0.42
   3   6  14    8.65    0.43
  -3  -6  14    8.08    0.44
  -3  -6  14    9.23    0.67
   3  -6 -14    8.71    0.66
  -3   6 -14    9.05    0.69
  -3   0  15    0.03    0.18
   3   0  15    0.07    0.33
   3   0 -15   -0.39    0.33
  -3   0  15    0.60    0.34
  -3   1  15   52.51    1.39
   3   1 -15   48.63    1.66
  -3   1  15   49.19    1.59
   3  -1  15   49.24    1.57
   3  -1 -15   50.30    1.66
  -3  -1  15   50.21    1.36
   3   1  15   49.87    1.55
  -3  -1  15   50.11    1.62
   3   2 -15    3.78    0.50
  -3   2  15    3.50    0.48
   3  -2  15    3.60    0.50
  -3   2  15    4.13    0.35
   3  -2 -15    3.69    0.50
   3   2  15    4.69    0.48
  -3  -2  15    4.25    0.52
   3  -3  15    5.29    0.55
   3   3 -15    5.63    0.56
  -3   3  15    6.11    0.55
  -3   3  15    5.48    0.39
   3   3  15    6.73    0.51
  -3   3 -15    5.32    0.51
  -3  -3  15    5.48    0.57
   3  -3 -15    5.43    0.55
  -3   4  15    0.85    0.36
   3  -4  15    0.78    0.38
  -3   4  15    0.75    0.24
   3   4 -15    1.09    0.40
  -3   4 -15    0.62    0.34
   3   4  15    1.06    0.35
   3  -4 -15    0.75    0.41
  -3  -4  15    0.39    0.36
   4   0   0   37.23    0.97
  -4   0   0   38.44    0.99
   4   0   0   38.26    0.99
   4  -1   0  215.45    5.14
   4  -1   0  209.80    5.00
  -4   1   0  206.83    5.13
   4   1   0  210.29    5.00
  -4   1   0  212.98    4.93
  -4   1   0  207.24    4.99
  -4  -1   0  211.28    5.11
   4  -1   0  211.49    5.00
   4   1   0  211.25    5.11
  -4   2   0  328.02    7.87
  -4   2   0  335.24    8.10
   4  -2   0  333.47    8.10
  -4   2   0  331.95    7.85
   4   2   0  334.86    7.95
   4   2   0  338.46    8.16
   4  -2   0  333.49    7.87
   4  -2   0  332.17    7.76
   4  -3   0  267.24    6.58
   4  -3   0  272.77    6.30
   4  -3   0  266.89    6.38
  -4   3   0  269.30    6.30
   4   3   0  268.63    6.39
  -4   3   0  264.13    6.38
  -4   3   0  274.21    6.58
   4   3   0  266.59    6.26
   4   4   0   96.77    2.33
  -4   4   0   91.69    2.36
   4  -4   0   97.15    2.36
  -4   4   0   94.11    2.34
   4   4   0   95.15    2.37
   4   5   0   65.91    1.67
  -4   5   0   62.42    1.69
   4   5   0   65.35    1.71
  -4   5   0   66.61    1.69
  -4   6   0   95.26    2.40
   4   6   0   91.93    2.12
   4   6   0   95.96    2.36
  -4   6   0   91.42    2.37
   4   6   0   96.15    2.41
  -4   6   0   89.72    2.13
  -4   7   0    8.05    0.42
   4   7   0    7.76    0.38
  -4   7   0    7.45    0.47
  -4   7   0    7.63    0.42
   4   7   0    7.21    0.42
   4   7   0    7.87    0.42
   4   8   0   39.51    1.24
  -4   8   0   40.63    1.24
   4   8   0   40.90    1.22
  -4   8   0   40.56    1.11
   4   8   0   40.33    1.09
  -4   9   0    0.54    0.28
   4   9   0    0.68    0.28
   4   9   0    0.67    0.27
  -4   9   0    0.81    0.28
   4   9   0    0.81    0.25
  -4   9   0    0.62    0.27
  -4  10   0    0.06    0.25
   4  10   0    0.46    0.26
  -4  10   0    0.00    0.25
  -4  10   0    0.29    0.26
   4  10   0    0.32    0.24
   4  10   0    0.65    0.28
  -4  11   0   13.44    0.69
   4  11   0   12.00    0.65
   4  11   0   13.62    0.61
   4  11   0   14.06    0.66
  -4  11   0   13.46    0.65
  -4  11   0   13.01    0.68
  -4  12   0   -0.07    0.26
   4  12   0    0.10    0.26
  -4  12   0   -0.06    0.27
   4  12   0    0.52    0.29
  -4  12   0    0.22    0.28
   4  12   0    0.06    0.27
  -4  13   0    7.74    0.60
   4  13   0    6.89    0.54
  -4  13   0    7.92    0.54
   4  13   0    7.09    0.51
   4  13   0    7.76    0.57
  -4  13   0    7.75    0.62
   4  14   0   12.06    0.70
  -4  14   0   12.56    0.80
   4  14   0   14.51    0.82
   4  14   0   13.12    0.78
  -4  14   0   13.27    0.75
  -4  14   0   13.53    0.80
   4   0   1   27.80    0.72
  -4   0  -1   25.64    0.71
  -4   0   1   28.05    0.75
  -4   0  -1   26.32    0.72
   4   0   1   27.92    0.72
   4   0  -1   26.92    0.76
  -4   0   1   27.81    0.73
  -4   1   1    4.52    0.24
  -4   1   1    5.03    0.24
   4  -1   1    4.47    0.22
  -4   1   1    4.45    0.23
   4   1  -1    4.35    0.25
   4   1  -1    4.60    0.23
  -4   1   1    4.90    0.26
  -4  -1  -1    4.13    0.18
   4  -1   1    4.60    0.21
   4  -1   1    4.62    0.25
  -4  -1  -1    3.97    0.22
  -4  -1   1    4.48    0.25
  -4   1  -1    4.22    0.21
  -4   1  -1    4.35    0.23
  -4  -1   1    4.48    0.25
  -4   1  -1    4.46    0.26
   4  -1  -1    4.19    0.24
   4   1   1    4.65    0.18
   4  -1  -1    4.80    0.27
   4  -1  -1    4.16    0.23
   4   1   1    4.51    0.22
  -4   2   1  170.92    4.01
   4   2  -1  176.18    4.18
  -4   2   1  165.58    4.08
  -4   2   1  170.71    4.20
   4  -2   1  167.09    4.06
   4   2  -1  172.08    4.08
  -4  -2   1  167.25    4.08
   4   2   1  167.78    4.07
  -4   2  -1  168.61    4.19
  -4  -2   1  166.88    3.99
  -4   2  -1  172.53    4.03
   4  -2  -1  174.87    4.01
  -4   2  -1  173.58    4.06
   4   2   1  172.12    4.13
  -4   2  -1  169.54    4.06
   4   3  -1  382.43    8.95
   4  -3   1  374.62    8.92
  -4   3   1  382.03    8.91
   4  -3  -1  382.59    8.81
   4   3   1  381.84    8.76
   4   3   1  380.10    8.94
   4  -3  -1  380.64    8.94
   4  -3  -1  372.97    9.21
  -4   3  -1  381.50    9.20
  -4   3  -1  364.46    8.92
  -4   3  -1  379.24    8.83
   4  -4   1   16.16    0.52
  -4   4   1   16.06    0.53
  -4   4   1   15.85    0.53
   4   4  -1   15.87    0.55
   4   4  -1   15.54    0.53
   4   4   1   15.75    0.52
  -4   4  -1   15.64    0.52
   4  -4  -1   16.23    0.59
   4   4   1   15.64    0.53
   4   5  -1   54.85    1.47
   4   5  -1   55.51    1.50
  -4   5   1   59.72    1.49
  -4   5   1   56.18    1.50
  -4   5   1   55.56    1.34
   4   5   1   57.89    1.50
  -4   5  -1   55.41    1.48
  -4   5  -1   54.07    1.47
   4   5   1   56.71    1.47
   4  -5  -1   54.98    1.55
  -4   6   1  152.82    3.41
  -4   6   1  154.59    3.82
   4   6  -1  154.37    3.82
  -4   6   1  155.07    3.77
   4   6  -1  157.09    3.75
   4   6  -1  156.60    3.39
  -4   6  -1  154.83    3.81
  -4   6  -1  154.52    3.40
   4   6   1  153.28    3.82
   4   6   1  152.98    3.40
  -4   6  -1  153.75    3.78
   4   6   1  154.45    3.74
   4   7  -1   60.03    1.43
  -4   7   1   58.46    1.60
  -4   7   1   58.38    1.62
  -4   7   1   58.28    1.46
   4   7  -1   59.19    1.63
   4   7  -1   58.97    1.59
  -4   7  -1   58.47    1.45
   4   7   1   59.49    1.45
   4   7   1   59.28    1.62
   4   7   1   57.27    1.58
  -4   7  -1   58.56    1.62
  -4   7  -1   57.53    1.61
   4   8  -1   60.63    1.70
   4   8  -1   60.70    1.51
  -4   8   1   63.92    1.75
   4   8  -1   61.11    1.73
  -4   8   1   62.55    1.73
  -4   8   1   60.97    1.56
  -4   8  -1   59.82    1.72
   4   8   1   63.34    1.70
   4   8   1   63.42    1.74
   4   8   1   63.63    1.55
  -4   8  -1   61.49    1.55
  -4   8  -1   60.78    1.72
  -4   9   1   31.24    1.08
   4   9  -1   33.11    0.95
   4   9  -1   32.21    1.07
   4   9  -1   32.46    1.09
  -4   9   1   31.75    0.97
  -4   9   1   32.01    1.07
  -4   9  -1   31.61    1.09
   4   9   1   33.89    0.98
   4   9   1   30.46    1.05
  -4   9  -1   32.50    1.06
  -4   9  -1   31.71    0.96
  -4  -9   1   30.34    0.94
   4   9   1   31.94    1.08
   4  10  -1    7.66    0.50
   4  10  -1    7.29    0.48
  -4  10   1    7.62    0.49
  -4  10   1    7.73    0.50
  -4  10   1    7.17    0.54
   4  10  -1    8.26    0.48
   4  10   1    7.01    0.52
  -4  10  -1    7.50    0.50
   4  10   1    6.93    0.50
  -4  10  -1    8.08    0.56
  -4  10  -1    7.85    0.48
   4  10   1    6.97    0.46
  -4  11   1   45.74    1.30
   4  11  -1   42.79    1.41
  -4  11   1   43.57    1.42
  -4  11   1   43.62    1.42
   4  11  -1   44.58    1.25
   4  11  -1   43.33    1.38
   4  11   1   43.52    1.26
   4  11   1   41.59    1.37
  -4  11  -1   45.65    1.42
  -4  11  -1   42.01    1.40
  -4  11  -1   42.80    1.25
   4  11   1   46.21    1.44
   4  12  -1    4.65    0.44
  -4  12   1    5.31    0.48
  -4  12   1    5.11    0.47
   4  12  -1    5.55    0.50
   4  12  -1    5.14    0.50
  -4  12   1    6.23    0.54
   4  12   1    5.92    0.52
  -4  12  -1    5.40    0.51
  -4  12  -1    5.68    0.52
  -4  12  -1    6.05    0.49
   4  12   1    4.61    0.47
   4  12   1    4.77    0.44
   4  13  -1    2.12    0.39
  -4  13   1    1.86    0.36
   4  13  -1    2.16    0.37
   4  13  -1    2.36    0.40
  -4  13   1    1.79    0.38
  -4  13   1    1.65    0.36
  -4  13  -1    2.09    0.38
  -4  13  -1    1.69    0.37
   4  13   1    1.44    0.34
   4  13   1    2.23    0.37
  -4  13  -1    1.98    0.36
   4  13   1    1.94    0.37
  -4  14   1   20.72    0.97
   4  14  -1   19.71    0.86
  -4  14   1   22.40    1.01
  -4  14   1   20.89    0.90
   4  14  -1   22.15    1.01
   4  14  -1   21.02    0.98
   4  14   1   20.58    0.90
  -4  14  -1   21.27    0.89
   4  14   1   22.00    1.02
  -4  14  -1   19.85    0.97
   4  14   1   21.30    0.98
   4   0   2  242.84    5.71
  -4   0  -2  239.93    5.76
  -4   0  -2  233.15    5.61
  -4   0   2  240.26    5.82
  -4   0   2  236.87    5.66
  -4  -1  -2   11.87    0.35
  -4   1   2   10.55    0.34
   4  -1   2   10.73    0.34
  -4   1   2   11.09    0.38
   4  -1   2   10.32    0.34
   4   1  -2   12.47    0.41
  -4  -1  -2   11.87    0.35
   4   1  -2   12.70    0.41
  -4  -1   2   10.03    0.39
   4   1   2   10.86    0.35
  -4  -1   2   10.16    0.37
  -4   1  -2   12.25    0.38
  -4   1  -2   11.97    0.34
   4  -1  -2   12.91    0.40
  -4   1  -2   11.57    0.34
   4   2  -2  333.98    8.06
  -4   2   2  321.31    7.84
  -4  -2  -2  332.68    7.81
  -4   2   2  330.22    7.70
   4  -2   2  331.62    7.80
  -4  -2  -2  336.27    7.66
  -4   2   2  331.20    7.84
   4   2   2  335.61    8.00
   4  -2  -2  332.07    7.70
  -4  -2   2  332.93    7.84
  -4   2  -2  340.93    8.05
  -4   2  -2  326.04    7.80
   4   2   2  324.94    7.83
  -4   2  -2  337.36    7.80
   4  -2  -2  331.20    8.07
  -4   2  -2  326.34    7.74
   4  -2  -2  331.19    7.84
  -4   3   2   99.70    2.58
   4   3  -2  103.39    2.59
   4   3  -2  106.93    2.65
  -4   3   2  105.44    2.53
   4  -3   2  105.52    2.55
  -4  -3   2  107.52    2.58
  -4   3  -2  103.41    2.55
   4  -3  -2  104.53    2.67
  -4  -3   2  107.99    2.53
   4  -3  -2  106.16    2.52
   4   3   2  104.26    2.51
   4   3   2  104.39    2.56
  -4   3  -2  103.46    2.55
   4   4  -2   99.39    2.44
  -4   4   2   99.51    2.50
   4  -4   2  101.50    2.45
  -4   4   2   99.54    2.44
   4   4  -2   99.13    2.49
  -4   4  -2   97.06    2.45
   4   4   2   98.82    2.48
   4  -4  -2  101.36    2.58
  -4   4  -2  100.64    2.46
   4   4   2   99.13    2.42
  -4   5   2   44.07    1.25
   4   5  -2   45.97    1.23
   4   5  -2   44.27    1.25
  -4   5   2   45.91    1.23
  -4   5   2   44.58    1.12
   4  -5   2   46.68    1.23
   4  -5   2   44.63    1.23
   4   5   2   46.90    1.22
  -4   5  -2   45.54    1.25
  -4   5  -2   43.52    1.22
   4  -5  -2   45.04    1.30
   4   5   2   47.10    1.25
   4   5   2   44.95    1.12
  -4   6   2   34.06    1.00
   4  -6   2   32.05    0.98
   4   6  -2   33.30    0.98
   4   6  -2   33.40    0.97
  -4   6   2   31.66    0.89
  -4   6   2   32.28    0.96
   4   6  -2   33.38    1.00
   4  -6  -2   30.60    1.02
  -4   6  -2   33.45    0.99
   4   6   2   33.65    0.97
  -4   6  -2   31.85    0.95
   4   6   2   30.72    0.87
   4   6   2   32.99    0.99
  -4   6  -2   32.66    0.88
   4   7  -2   14.84    0.59
  -4   7   2   14.81    0.62
  -4   7   2   13.62    0.55
   4   7  -2   14.79    0.61
   4   7  -2   15.00    0.51
  -4   7   2   14.94    0.60
   4   7  -2   15.49    0.60
   4   7   2   14.41    0.60
   4   7   2   13.49    0.53
  -4   7  -2   14.61    0.57
  -4   7  -2   14.85    0.54
  -4   7  -2   15.27    0.62
   4   7   2   13.83    0.59
   4   8  -2   33.09    1.05
  -4   8   2   33.01    0.97
  -4   8   2   31.18    1.03
   4   8  -2   31.84    1.04
   4   8  -2   32.09    1.06
   4   8  -2   32.72    0.91
  -4   8   2   33.51    1.07
  -4  -8   2   34.05    0.95
  -4   8  -2   33.35    0.96
   4   8   2   33.21    1.04
   4   8   2   33.48    0.95
  -4   8  -2   32.25    1.04
  -4   8  -2   32.72    1.07
   4   8   2   31.88    1.06
   4   9  -2   26.08    0.93
  -4   9   2   24.71    0.93
  -4   9   2   27.61    0.96
  -4   9   2   26.93    0.87
   4   9  -2   25.50    0.91
   4   9  -2   26.47    0.80
   4   9  -2   26.07    0.94
  -4  -9   2   25.78    0.83
  -4   9  -2   26.41    0.91
   4   9   2   25.15    0.93
   4   9   2   26.04    0.84
   4   9   2   23.94    0.91
  -4   9  -2   26.42    0.83
  -4   9  -2   25.39    0.94
  -4  10   2    3.35    0.38
  -4  10   2    3.41    0.38
   4  10  -2    3.88    0.39
   4  10  -2    3.81    0.36
  -4  10   2    3.17    0.39
   4  10  -2    3.42    0.39
   4  10  -2    4.05    0.39
  -4  10  -2    4.02    0.36
   4  10   2    3.30    0.37
  -4 -10   2    3.74    0.36
   4  10   2    2.83    0.35
  -4  10  -2    3.63    0.40
  -4  10  -2    3.82    0.39
   4  10   2    3.57    0.37
   4  11  -2   40.02    1.30
  -4  11   2   39.34    1.32
   4  11  -2   38.94    1.14
  -4  11   2   38.13    1.28
   4  11  -2   39.56    1.32
  -4  11   2   38.26    1.18
  -4  11  -2   38.30    1.30
  -4  11  -2   39.20    1.31
   4  11   2   38.12    1.27
   4  11   2   38.50    1.30
   4  11   2   40.59    1.19
  -4  11  -2   39.75    1.16
  -4  12   2    1.04    0.31
   4  12  -2    1.56    0.35
   4  12  -2    1.65    0.34
  -4  12   2    1.01    0.34
   4  12  -2    1.35    0.32
  -4  12   2    1.56    0.36
   4  12   2    1.75    0.35
   4  12   2    1.31    0.33
  -4  12  -2    1.50    0.32
  -4  12  -2    1.49    0.35
  -4  12  -2    0.80    0.33
   4  12   2    1.72    0.36
  -4  13   2    9.77    0.68
  -4  13   2   10.98    0.67
   4  13  -2   10.68    0.60
  -4  13   2   10.60    0.63
   4  13  -2   10.23    0.68
   4  13  -2    9.84    0.66
   4  13   2   11.27    0.66
  -4  13  -2   10.00    0.66
   4  13   2   11.09    0.66
  -4  13  -2   11.19    0.63
   4  13   2   10.15    0.66
  -4  14   2    8.12    0.68
   4  14  -2    9.52    0.68
   4  14  -2    8.42    0.59
  -4  14   2    7.55    0.63
  -4  14   2    8.97    0.65
   4  14  -2    8.83    0.68
  -4  14  -2    9.13    0.68
   4  14   2    7.92    0.63
  -4  14  -2    8.10    0.62
   4  14   2    8.22    0.60
   4  14   2    8.42    0.63
   4   0  -3  135.34    3.43
  -4   0   3  146.65    3.33
  -4   0   3  140.51    3.32
   4   0   3  144.67    3.25
  -4   0  -3  130.06    3.25
   4   0  -3  128.39    3.31
  -4   1   3   25.16    0.62
   4   1  -3   23.07    0.68
  -4  -1  -3   24.17    0.63
   4  -1   3   24.09    0.62
  -4   1   3   24.21    0.69
   4   1  -3   24.37    0.72
  -4  -1  -3   24.21    0.62
  -4   1  -3   23.23    0.61
   4  -1  -3   23.51    0.72
   4   1   3   24.60    0.63
  -4  -1   3   24.49    0.68
  -4   1  -3   23.64    0.61
  -4  -1   3   25.02    0.72
  -4   2   3    1.77    0.18
  -4  -2  -3    1.54    0.14
  -4   2   3    1.63    0.14
   4  -2   3    1.61    0.14
   4   2  -3    1.57    0.19
   4   2  -3    1.60    0.17
  -4   2   3    1.74    0.16
  -4   2  -3    1.31    0.16
  -4   2  -3    1.34    0.11
  -4   2  -3    1.86    0.15
   4  -2  -3    1.41    0.13
  -4  -2   3    1.82    0.17
   4  -2  -3    1.33    0.19
  -4  -2   3    1.99    0.17
   4  -2  -3    1.35    0.16
   4   2   3    1.66    0.15
   4   2   3    1.73    0.15
  -4   3   3  186.59    4.30
   4  -3   3  184.03    4.34
  -4   3   3  174.13    4.40
   4   3  -3  184.64    4.53
   4   3  -3  179.41    4.39
  -4  -3   3  181.73    4.30
   4   3   3  185.07    4.40
  -4  -3   3  187.96    4.30
  -4   3  -3  179.27    4.34
   4  -3  -3  184.04    4.29
  -4  -3   3  183.87    4.39
   4   3   3  181.46    4.27
  -4   3  -3  176.16    4.33
   4   3   3  182.29    4.36
  -4   4   3    0.19    0.14
   4   4  -3    0.21    0.15
   4  -4   3    0.04    0.11
  -4   4   3    0.31    0.16
  -4   4  -3    0.05    0.12
   4   4   3    0.29    0.11
  -4   4  -3    0.09    0.15
   4  -4  -3    0.01    0.20
   4   4   3    0.09    0.13
   4   4   3    0.04    0.13
   4   5  -3   51.17    1.40
   4   5  -3   53.88    1.38
  -4   5   3   49.86    1.40
   4  -5   3   52.54    1.36
   4  -5   3   50.64    1.38
  -4   5   3   51.64    1.25
  -4   5   3   52.27    1.36
  -4   5  -3   51.31    1.39
   4   5   3   50.13    1.37
   4   5   3   52.61    1.34
   4   5   3   50.62    1.35
   4  -5  -3   51.71    1.46
   4   5   3   50.31    1.25
  -4   5  -3   48.68    1.35
   4   6  -3  125.39    3.04
  -4   6   3  122.13    3.03
   4   6  -3  126.00    3.04
   4  -6   3  127.60    3.06
   4  -6   3  120.05    2.99
   4   6  -3  124.61    3.10
  -4   6   3  122.99    3.10
  -4   6   3  123.33    2.77
  -4   6  -3  120.59    3.06
   4  -6  -3  123.15    3.20
   4   6   3  120.36    3.08
  -4   6  -3  123.26    2.74
   4   6   3  119.40    2.76
   4   6   3  121.05    3.01
  -4   6  -3  121.16    3.05
   4  -7   3   93.76    2.39
   4   7  -3   95.56    2.41
  -4   7   3   94.26    2.20
  -4   7   3   96.68    2.47
  -4   7   3   94.43    2.41
   4   7  -3   93.31    2.41
   4   7  -3   95.67    2.45
   4   7  -3   93.53    2.13
   4   7   3   93.55    2.20
   4   7   3   93.50    2.45
   4  -7  -3   91.72    2.53
   4   7   3   93.40    2.39
  -4   7  -3   92.94    2.44
  -4   7  -3   90.12    2.41
  -4  -7   3   96.23    2.31
  -4   7  -3   92.92    2.17
   4   8  -3   81.55    2.17
  -4   8   3   83.58    2.19
   4   8  -3   83.74    1.93
  -4   8   3   81.95    1.99
   4   8  -3   80.91    2.18
   4   8  -3   83.30    2.22
   4  -8   3   86.07    2.18
  -4   8   3   80.65    2.23
  -4  -8   3   82.74    2.07
   4   8   3   82.92    2.17
   4   8   3   84.01    1.99
  -4   8  -3   79.91    2.21
  -4   8  -3   80.28    1.95
  -4   8  -3   79.16    2.18
   4   8   3   82.78    2.22
  -4   9   3   21.32    0.76
   4   9  -3   22.14    0.82
  -4   9   3   21.15    0.80
  -4   9   3   20.49    0.83
   4   9  -3   21.76    0.83
   4   9  -3   21.60    0.81
   4   9  -3   21.80    0.70
  -4  -9   3   22.76    0.76
   4   9   3   21.31    0.82
  -4   9  -3   20.41    0.83
  -4   9  -3   21.17    0.79
  -4   9  -3   21.61    0.72
   4   9   3   22.08    0.76
   4   9   3   20.70    0.80
   4  10  -3    0.17    0.27
  -4  10   3   -0.16    0.26
   4  10  -3   -0.16    0.22
  -4  10   3   -0.22    0.22
   4  10  -3    0.13    0.26
   4  10  -3    0.17    0.25
  -4  10   3    0.01    0.25
  -4 -10   3    0.44    0.27
   4  10   3    0.07    0.24
   4  10   3   -0.17    0.24
  -4  10  -3    0.13    0.25
  -4  10  -3    0.20    0.26
  -4  10  -3   -0.07    0.24
   4  10   3   -0.10    0.24
   4  11  -3   29.11    1.07
   4  11  -3   28.82    0.91
  -4  11   3   28.90    1.08
   4  11  -3   30.85    1.10
   4  11  -3   29.18    1.06
  -4  11   3   28.39    0.97
  -4  11   3   28.01    1.06
   4  11   3   29.30    1.06
  -4  11  -3   30.67    0.95
   4  11   3   28.68    0.97
  -4  11  -3   28.46    1.07
   4  11   3   28.57    1.07
  -4 -11   3   28.07    0.95
  -4  11  -3   27.61    1.03
   4  12  -3   10.48    0.66
  -4  12   3   10.54    0.61
   4  12  -3    9.45    0.55
  -4  12   3   11.46    0.67
   4  12  -3   10.33    0.64
  -4  12   3   10.16    0.64
  -4  12  -3   11.37    0.69
   4  12   3   10.46    0.63
   4  12   3   10.13    0.64
   4  12   3   11.59    0.65
  -4  12  -3   11.17    0.58
  -4  13   3    1.35    0.38
   4  13  -3    1.22    0.35
  -4  13   3    1.29    0.37
   4  13  -3    1.48    0.35
   4  13  -3    1.37    0.33
  -4  13   3    1.47    0.38
   4  13   3    1.31    0.38
  -4  13  -3    1.92    0.41
  -4  13  -3    1.90    0.37
   4  13   3    1.72    0.37
   4  13   3    1.38    0.34
  -4   0   4  136.68    3.39
  -4   0  -4  141.74    3.30
  -4   0  -4  140.82    3.24
   4   0  -4  137.02    3.40
  -4   0   4  140.58    3.41
   4   0   4  142.52    3.30
   4   0  -4  142.24    3.52
  -4   0  -4  142.06    3.30
  -4   1   4   49.85    1.25
  -4  -1  -4   47.47    1.18
  -4   1   4   47.98    1.24
  -4   1   4   48.17    1.15
   4   1  -4   46.26    1.24
  -4  -1  -4   47.30    1.17
   4  -1  -4   46.15    1.30
  -4   1  -4   47.22    1.14
  -4   1  -4   46.91    1.14
   4   1   4   48.21    1.17
  -4  -1   4   47.59    1.24
   4  -1  -4   47.51    1.24
  -4  -1   4   48.97    1.15
   4   2  -4  133.23    3.22
   4  -2   4  133.51    3.13
  -4   2   4  131.28    3.23
  -4   2   4  132.30    3.11
  -4   2   4  129.11    3.22
  -4  -2  -4  134.64    3.16
   4   2  -4  132.31    3.33
  -4   2  -4  136.36    3.13
   4   2   4  133.50    3.16
   4  -2  -4  133.57    3.23
  -4  -2   4  126.49    3.11
   4  -2  -4  134.35    3.11
  -4  -2   4  127.01    3.21
  -4   2  -4  132.23    3.17
  -4   2  -4  131.75    3.13
   4   2   4  132.77    3.10
   4  -2  -4  129.94    3.33
   4   3  -4  177.41    4.31
  -4   3   4  181.74    4.20
   4  -3   4  183.06    4.24
  -4   3   4  176.37    4.33
  -4  -3   4  179.77    4.31
   4   3   4  185.91    4.31
   4   3   4  182.18    4.28
   4   3   4  180.82    4.19
   4  -3  -4  175.89    4.20
  -4   3  -4  167.75    4.24
   4  -3  -4  170.73    4.45
  -4  -3   4  183.12    4.20
  -4  -3   4  179.09    4.22
  -4   3  -4  172.97    4.25
   4  -4   4   82.02    2.03
  -4   4   4   80.29    2.10
  -4   4   4   81.63    2.02
   4   4  -4   83.50    2.17
   4   4  -4   80.98    2.09
   4   4   4   82.32    2.03
  -4   4  -4   81.27    2.03
   4   4   4   80.90    2.06
  -4   4  -4   80.94    2.06
   4  -4  -4   82.86    2.18
   4   4   4   82.96    2.02
   4   4   4   82.03    1.87
   4  -5   4   92.68    2.25
   4  -5   4   91.16    2.25
  -4   5   4   88.93    2.06
  -4   5   4   87.21    2.31
   4   5  -4   89.15    2.31
  -4   5   4   89.39    2.24
   4   5  -4   91.82    2.25
   4   5   4   89.74    2.24
   4  -5  -4   92.17    2.40
   4   5   4   92.89    2.26
   4   5   4   88.12    2.06
  -4   5  -4   87.32    2.24
  -4   5  -4   91.28    2.29
   4   5   4   87.48    2.28
  -4   6   4    7.31    0.42
   4   6  -4    8.45    0.42
  -4   6   4    7.19    0.41
  -4   6   4    7.22    0.40
   4  -6   4    7.20    0.39
   4   6  -4    8.12    0.42
   4  -6   4    6.98    0.48
   4   6  -4    7.76    0.41
  -4   6  -4    7.71    0.46
   4   6   4    7.73    0.40
   4  -6  -4    7.80    0.48
   4   6   4    7.34    0.40
  -4  -6   4    8.27    0.42
  -4   6  -4    7.08    0.37
   4   6   4    8.06    0.40
  -4   6  -4    7.73    0.37
  -4   7   4   11.38    0.54
   4   7  -4   10.95    0.54
   4   7  -4   11.28    0.54
   4  -7   4   11.79    0.62
  -4   7   4   11.25    0.53
   4   7  -4   11.37    0.54
   4   7  -4   10.93    0.43
  -4   7   4   11.41    0.51
  -4   7  -4   10.84    0.48
   4   7   4   11.64    0.51
   4  -7  -4   11.09    0.61
   4   7   4   11.84    0.52
   4   7   4   11.37    0.53
  -4   7  -4   11.08    0.55
  -4   7  -4   10.82    0.49
  -4  -7   4   11.86    0.53
  -4   8   4   34.76    1.12
   4   8  -4   33.89    0.92
  -4   8   4   33.22    1.00
   4   8  -4   34.10    1.11
   4   8  -4   35.37    1.09
  -4   8   4   33.36    1.07
   4   8  -4   35.72    1.10
   4  -8   4   32.70    1.12
   4   8   4   33.42    1.07
  -4  -8   4   36.28    1.03
  -4   8  -4   32.73    0.96
  -4   8  -4   32.99    1.10
   4   8   4   33.61    1.00
   4   8   4   33.42    1.09
  -4   8  -4   33.48    1.06
   4  -9   4   21.25    0.88
  -4   9   4   21.43    0.86
   4   9  -4   23.44    0.86
  -4   9   4   20.82    0.83
   4   9  -4   23.43    0.86
   4   9  -4   23.92    0.72
  -4   9   4   22.10    0.79
   4   9  -4   23.13    0.87
   4   9   4   21.37    0.84
   4   9   4   21.52    0.83
  -4   9  -4   22.68    0.88
  -4  -9   4   22.70    0.78
   4   9   4   21.22    0.77
  -4   9  -4   23.71    0.75
  -4   9  -4   23.51    0.83
  -4  10   4    6.09    0.50
  -4  10   4    6.64    0.49
   4  10  -4    8.29    0.54
   4  10  -4    6.80    0.52
   4 -10   4    6.82    0.60
   4  10  -4    7.41    0.52
  -4  10   4    6.84    0.49
   4  10  -4    7.35    0.44
   4  10   4    6.53    0.48
  -4  10  -4    7.48    0.46
  -4 -10   4    7.02    0.49
   4  10   4    6.71    0.48
  -4  10  -4    6.92    0.49
  -4  10  -4    7.47    0.56
   4  10   4    6.58    0.49
  -4  11   4   13.73    0.66
   4  11  -4   13.03    0.69
  -4  11   4   13.68    0.67
   4  11  -4   14.52    0.73
  -4  11   4   14.13    0.71
   4  11  -4   13.42    0.57
   4  11  -4   13.05    0.69
   4  11   4   13.00    0.69
   4  11   4   13.08    0.65
  -4  11  -4   13.56    0.61
   4  11   4   13.71    0.68
  -4  11  -4   14.54    0.74
  -4 -11   4   14.09    0.65
   4  12  -4   -0.09    0.27
   4  12  -4   -0.41    0.26
  -4  12   4    0.37    0.28
   4  12  -4    0.01    0.24
  -4  12   4    0.02    0.27
  -4  12   4   -0.03    0.28
  -4 -12   4   -0.05    0.30
  -4  12  -4   -0.07    0.27
  -4  12  -4   -0.32    0.27
   4  12   4    0.10    0.27
   4  12   4    0.07    0.29
   4  12   4    0.32    0.28
  -4  13   4   10.29    0.67
   4  13  -4   10.12    0.55
  -4  13   4    9.71    0.63
   4  13  -4    9.19    0.66
  -4  13   4   10.20    0.68
   4  13  -4   10.12    0.64
   4  13   4   10.00    0.63
   4  13   4    9.85    0.67
   4  13   4   10.15    0.66
  -4  13  -4    9.55    0.58
  -4  13  -4   10.46    0.71
  -4   0   5  247.68    5.87
   4   0  -5  245.36    6.08
   4   0  -5  242.66    5.87
  -4   0   5  251.54    5.88
  -4   0  -5  243.41    5.98
  -4   1   5    4.43    0.27
  -4   1   5    4.24    0.16
   4   1  -5    4.18    0.26
  -4  -1  -5    4.27    0.20
  -4  -1  -5    4.65    0.18
  -4   1   5    4.30    0.27
   4   1  -5    4.35    0.34
  -4  -1   5    4.02    0.17
  -4  -1   5    4.22    0.27
   4  -1  -5    4.97    0.28
   4   1   5    4.41    0.18
   4  -1  -5    4.51    0.32
  -4   1  -5    4.58    0.27
  -4   2   5   42.28    1.07
   4   2  -5   44.87    1.18
  -4   2   5   43.45    1.18
  -4   2   5   42.11    1.19
   4   2  -5   44.06    1.25
   4  -2   5   43.97    1.07
  -4  -2  -5   44.22    1.11
   4   2   5   43.05    1.09
  -4  -2   5   41.92    1.08
   4  -2  -5   44.68    1.26
  -4  -2   5   44.23    1.17
  -4   2  -5   45.67    1.07
   4   2   5   43.41    1.11
  -4   2  -5   44.89    1.17
  -4   2  -5   44.78    1.07
   4  -2  -5   44.93    1.08
  -4   3   5   77.96    1.94
   4  -3   5   76.71    1.83
   4   3  -5   74.12    2.01
   4   3  -5   71.74    1.91
  -4   3   5   78.15    1.82
  -4  -3  -5   73.47    1.85
   4  -3   5   74.00    1.88
   4  -3  -5   72.18    2.00
  -4  -3   5   76.87    1.91
   4  -3  -5   73.24    1.82
  -4  -3   5   75.31    1.86
   4   3   5   76.32    1.87
  -4  -3   5   75.98    1.82
  -4   3  -5   71.98    1.89
   4   3   5   76.43    1.85
  -4   3  -5   73.79    1.82
   4   3   5   74.73    1.83
   4  -4   5   22.58    0.64
  -4   4   5   22.10    0.65
  -4   4   5   21.89    0.63
   4   4  -5   22.25    0.70
  -4   4   5   22.17    0.72
   4   4   5   22.22    0.62
  -4  -4   5   22.39    0.71
   4   4   5   22.31    0.67
  -4   4  -5   21.69    0.72
  -4   4  -5   21.87    0.64
   4   4   5   22.48    0.68
   4   4   5   22.38    0.64
   4  -4  -5   22.42    0.79
  -4  -4   5   22.76    0.70
   4  -4  -5   22.19    0.66
  -4  -4   5   21.88    0.70
   4   5  -5   17.00    0.62
   4   5  -5   16.95    0.58
  -4   5   5   17.16    0.57
  -4   5   5   17.11    0.64
   4  -5   5   16.96    0.56
  -4   5   5   17.77    0.58
  -4   5  -5   17.81    0.63
   4   5   5   15.55    0.56
   4   5   5   16.47    0.59
   4   5   5   17.25    0.58
  -4  -5   5   17.24    0.62
   4   5   5   17.29    0.54
  -4   5  -5   17.71    0.56
   4  -5  -5   17.71    0.68
   4   6  -5   27.78    0.87
   4  -6   5   29.21    0.85
   4   6  -5   27.34    0.89
   4  -6   5   29.85    0.94
  -4   6   5   28.73    0.86
  -4   6   5   28.68    0.92
  -4   6   5   28.24    0.82
  -4   6  -5   26.12    0.83
  -4   6  -5   27.28    0.90
   4   6   5   27.88    0.88
  -4  -6   5   28.87    0.88
  -4   6  -5   26.58    0.76
   4  -6  -5   28.04    0.97
   4   6   5   27.61    0.82
   4   6   5   27.65    0.86
  -4   7   5   21.33    0.72
   4   7  -5   19.86    0.74
  -4   7   5   20.70    0.72
   4  -7   5   20.78    0.71
   4  -7   5   18.66    0.80
   4   7  -5   19.78    0.73
  -4   7   5   19.19    0.75
   4   7   5   20.62    0.69
  -4   7  -5   19.57    0.64
   4  -7  -5   20.40    0.80
  -4   7  -5   19.60    0.69
   4   7   5   19.19    0.73
   4   7   5   19.43    0.72
  -4   7  -5   19.89    0.78
  -4  -7   5   20.21    0.71
   4   8  -5   89.03    2.26
   4   8  -5   86.31    2.28
   4  -8   5   82.85    2.24
   4   8  -5   88.15    2.24
  -4   8   5   84.65    2.07
  -4   8   5   83.36    2.22
  -4   8   5   83.77    2.30
   4   8  -5   85.93    1.95
   4  -8  -5   84.74    2.37
  -4   8  -5   83.11    2.27
   4   8   5   83.86    2.06
   4   8   5   84.66    2.23
  -4   8  -5   84.71    2.23
  -4   8  -5   83.23    1.99
  -4  -8   5   84.80    2.17
   4   8   5   81.28    2.27
   4   9  -5   37.02    1.19
   4  -9   5   36.59    1.23
   4   9  -5   37.89    1.21
  -4   9   5   37.20    1.22
  -4   9   5   38.76    1.11
   4   9  -5   37.20    0.99
   4   9  -5   37.35    1.19
  -4   9   5   37.36    1.17
   4   9   5   37.09    1.20
  -4   9  -5   36.89    1.03
  -4  -9   5   36.42    1.12
  -4   9  -5   37.44    1.22
   4   9   5   37.11    1.18
  -4   9  -5   36.86    1.13
  -4   9  -5   36.66    1.15
   4   9   5   36.55    1.10
  -4  10   5    4.57    0.46
   4  10  -5    4.18    0.41
   4  10  -5    4.52    0.42
   4  10  -5    4.21    0.35
   4 -10   5    5.09    0.51
  -4  10   5    4.54    0.43
   4  10  -5    4.27    0.44
  -4  10   5    4.28    0.40
   4  10   5    3.82    0.41
   4  10   5    3.74    0.40
  -4  10  -5    3.75    0.43
  -4  10  -5    4.15    0.37
  -4 -10   5    4.71    0.42
   4  10   5    3.70    0.40
  -4  11   5   29.62    1.01
   4  11  -5   29.20    0.89
  -4  11   5   27.25    1.08
   4  11  -5   28.73    1.08
   4 -11   5   28.22    1.09
  -4  11   5   28.54    1.04
   4  11  -5   30.10    1.07
   4  11  -5   26.95    1.06
  -4  11  -5   30.63    0.94
  -4 -11   5   29.27    1.01
   4  11   5   29.80    1.08
  -4  11  -5   27.58    1.07
   4  11   5   29.45    0.99
   4  11   5   28.95    1.05
  -4  12   5    6.29    0.53
  -4  12   5    6.70    0.55
   4  12  -5    6.26    0.44
  -4  12   5    6.87    0.54
   4  12   5    5.71    0.50
  -4  12  -5    5.70    0.55
  -4 -12   5    6.12    0.53
   4  12   5    6.85    0.52
   4  12   5    6.30    0.50
  -4  12  -5    6.03    0.46
  -4  13   5    4.64    0.51
  -4  13   5    5.93    0.57
  -4  13   5    4.78    0.52
   4  13  -5    4.89    0.43
  -4  13  -5    5.51    0.57
   4  13   5    4.33    0.48
   4  13   5    5.31    0.54
  -4  13  -5    4.98    0.45
   4  13   5    4.87    0.50
  -4   0   6   79.69    1.95
  -4   0  -6   76.21    1.96
  -4   0   6   79.30    1.96
   4   0  -6   75.75    2.06
   4   0  -6   75.46    1.95
  -4  -1  -6   50.59    1.24
   4   1  -6   50.18    1.35
  -4  -1  -6   50.39    1.32
  -4   1   6   50.61    1.35
   4   1  -6   52.49    1.46
  -4   1   6   51.78    1.36
  -4   1   6   52.58    1.37
   4  -1  -6   50.82    1.44
   4  -1  -6   51.36    1.36
   4   1   6   53.01    1.24
  -4   1  -6   50.46    1.33
  -4  -1   6   51.74    1.36
  -4  -1   6   52.04    1.36
  -4  -1   6   52.02    1.35
  -4   2   6   52.48    1.36
  -4   2   6   51.27    1.36
  -4   2   6   49.98    1.22
  -4  -2  -6   50.21    1.29
   4   2  -6   50.33    1.34
   4  -2   6   49.92    1.34
  -4   2   6   50.57    1.35
  -4  -2   6   50.56    1.23
   4   2   6   51.01    1.27
   4  -2  -6   50.66    1.44
   4   2   6   51.56    1.24
  -4  -2   6   50.51    1.34
  -4   2  -6   49.22    1.33
  -4  -2   6   51.73    1.35
   4   3  -6  155.85    3.78
   4  -3   6  158.21    3.67
   4   3  -6  159.02    3.95
   4  -3   6  148.57    3.69
  -4  -3  -6  154.55    3.78
  -4   3   6  154.46    3.64
  -4   3   6  148.12    3.79
   4  -3  -6  161.26    3.95
  -4  -3   6  157.50    3.65
   4  -3  -6  153.13    3.64
   4   3   6  150.42    3.72
  -4   3  -6  153.98    3.73
  -4  -3   6  151.99    3.69
  -4   3  -6  153.78    3.67
  -4   3  -6  154.54    3.60
  -4  -3   6  159.60    3.78
  -4  -3   6  155.12    3.69
   4   3   6  151.46    3.64
   4   3   6  157.41    3.78
   4   4  -6   37.22    1.08
  -4   4   6   38.27    0.97
  -4   4   6   37.77    1.00
   4  -4   6   38.10    0.99
   4  -4   6   38.13    1.10
  -4  -4  -6   37.47    1.00
  -4   4   6   35.90    1.10
  -4  -4   6   38.25    1.08
   4   4   6   37.07    1.04
  -4   4  -6   36.52    0.97
   4   4   6   37.45    1.02
  -4   4  -6   36.96    1.08
  -4   4  -6   36.98    0.99
  -4  -4   6   39.08    1.06
   4   4   6   39.09    1.00
   4  -4  -6   37.32    1.00
   4   4   6   37.86    0.98
   4  -4  -6   38.70    1.16
  -4  -4   6   39.60    1.08
   4   5  -6   47.17    1.42
   4   5  -6   48.22    1.28
  -4   5   6   46.77    1.35
  -4   5   6   44.73    1.19
   4  -5   6   48.37    1.25
   4   5  -6   47.45    1.33
  -4   5   6   45.74    1.25
  -4  -5   6   47.64    1.32
   4   5   6   45.77    1.19
  -4   5  -6   48.24    1.25
  -4   5  -6   49.02    1.33
   4   5   6   45.57    1.26
  -4   5  -6   48.05    1.23
   4  -5  -6   48.81    1.41
   4   5   6   48.47    1.25
   4   5   6   45.63    1.29
  -4   6   6   14.21    0.55
   4   6  -6   16.70    0.62
  -4   6   6   14.44    0.61
   4   6  -6   14.82    0.67
  -4   6   6   14.68    0.58
   4  -6   6   15.17    0.55
   4   6  -6   16.46    0.60
  -4   6  -6   15.09    0.61
  -4   6  -6   15.47    0.52
   4  -6  -6   15.25    0.70
  -4   6  -6   14.57    0.53
  -4  -6   6   14.69    0.63
  -4   6  -6   15.30    0.55
   4   6   6   14.19    0.56
   4   6   6   13.80    0.56
   4   6   6   14.39    0.58
   4   7  -6    5.78    0.44
  -4   7   6    5.75    0.42
  -4   7   6    6.04    0.43
  -4   7   6    5.10    0.41
   4   7  -6    5.79    0.43
   4  -7   6    5.22    0.49
  -4   7  -6    6.83    0.39
   4   7   6    6.28    0.41
   4   7   6    5.57    0.41
   4   7   6    5.80    0.41
  -4   7  -6    5.60    0.48
  -4   7  -6    5.78    0.39
   4  -7  -6    6.48    0.55
  -4  -7   6    5.64    0.47
  -4   7  -6    6.58    0.40
   4   8  -6   29.51    0.97
   4  -8   6   30.29    1.04
  -4   8   6   29.76    1.02
  -4   8   6   29.44    0.92
   4   8  -6   30.42    1.01
  -4   8   6   29.14    0.95
  -4   8  -6   29.22    0.85
   4   8   6   28.91    0.96
  -4   8  -6   29.09    0.94
   4   8   6   28.87    0.91
  -4   8  -6   29.97    1.02
   4   8   6   29.44    0.99
  -4  -8   6   29.09    0.96
   4  -8  -6   29.39    1.06
  -4   8  -6   29.79    0.92
   4   9  -6    7.78    0.49
  -4   9   6    7.31    0.50
  -4   9   6    7.54    0.49
   4   9  -6    7.73    0.50
   4  -9   6    7.74    0.64
  -4   9   6    7.98    0.53
  -4  -9   6    7.48    0.51
   4   9   6    8.22    0.50
   4   9   6    7.76    0.48
   4   9   6    7.38    0.48
  -4   9  -6    7.88    0.44
  -4   9  -6    6.81    0.53
  -4  10   6    0.88    0.29
   4 -10   6    0.26    0.38
   4  10  -6    0.52    0.29
  -4  10   6    0.82    0.30
   4  10  -6    0.33    0.26
  -4  10   6    0.57    0.29
  -4  10  -6    0.98    0.26
  -4 -10   6    0.65    0.31
   4  10   6    1.05    0.31
  -4  10  -6    0.26    0.29
   4  10   6    0.65    0.27
   4  10   6    0.37    0.25
  -4  11   6   16.79    0.76
  -4  11   6   17.67    0.83
  -4  11   6   16.88    0.77
   4 -11   6   18.12    0.87
   4  11  -6   17.91    0.80
   4  11   6   17.49    0.78
   4  11   6   17.86    0.80
  -4  11  -6   17.50    0.68
  -4  11  -6   17.01    0.82
   4  11   6   15.69    0.73
  -4 -11   6   17.31    0.75
  -4  12   6    1.14    0.36
   4 -12   6    1.57    0.48
  -4  12   6    1.74    0.37
  -4  12   6    1.96    0.36
   4  12   6    1.50    0.36
  -4  12  -6    1.83    0.41
   4  12   6    1.46    0.35
  -4  12  -6    1.23    0.30
  -4 -12   6    2.40    0.40
   4  12   6    1.77    0.38
  -4  13   6    6.16    0.56
  -4  13   6    5.66    0.56
  -4  13   6    6.64    0.57
  -4 -13   6    5.38    0.53
   4  13   6    6.32    0.56
  -4  13  -6    5.66    0.46
   4  13   6    5.88    0.57
   4  13   6    6.20    0.56
  -4  13  -6    5.11    0.57
   4   0  -7   96.03    2.35
  -4   0  -7   91.33    2.36
  -4   0   7   92.65    2.33
   4   0  -7   98.02    2.49
  -4   0   7   88.55    2.34
   4   1  -7    6.66    0.41
   4  -1   7    5.14    0.37
  -4   1   7    6.05    0.32
  -4   1   7    5.61    0.32
  -4  -1  -7    6.04    0.29
   4   1  -7    6.40    0.33
  -4   1   7    5.95    0.39
  -4   1  -7    6.09    0.33
  -4  -1   7    6.27    0.34
   4  -1  -7    6.92    0.35
  -4   1  -7    6.00    0.32
   4  -1  -7    6.36    0.43
  -4  -1   7    5.75    0.33
  -4   2   7   38.72    1.08
   4   2  -7   37.97    1.16
   4   2  -7   38.03    1.07
  -4  -2  -7   38.44    1.02
  -4   2   7   36.39    1.08
   4  -2   7   37.02    1.08
  -4   2   7   38.07    1.07
   4   2   7   39.48    0.97
  -4  -2   7   38.29    0.93
  -4  -2   7   37.35    1.09
  -4  -2   7   37.70    1.06
   4   2   7   38.10    0.95
   4  -2  -7   38.76    1.16
  -4   2  -7   38.18    1.05
   4  -3   7   55.77    1.29
   4  -3   7   51.81    1.44
   4   3  -7   51.69    1.42
   4   3  -7   51.86    1.53
  -4   3   7   52.38    1.43
  -4   3   7   55.74    1.45
  -4   3   7   51.21    1.44
  -4  -3  -7   52.70    1.38
   4  -3  -7   53.61    1.54
  -4   3  -7   52.45    1.41
   4   3   7   53.68    1.37
  -4  -3   7   53.99    1.42
  -4  -3   7   53.99    1.32
  -4  -3   7   53.08    1.44
   4   3   7   53.49    1.36
  -4   3  -7   52.32    1.29
  -4  -3   7   51.90    1.38
   4  -3  -7   52.98    1.30
   4   3   7   52.48    1.33
  -4  -4  -7    5.86    0.31
   4   4  -7    5.33    0.36
   4  -4   7    5.86    0.44
  -4   4   7    5.19    0.33
   4  -4   7    5.44    0.26
  -4   4   7    5.52    0.29
   4   4  -7    5.30    0.42
  -4   4   7    5.40    0.37
  -4   4  -7    5.33    0.26
  -4   4  -7    6.10    0.38
   4  -4  -7    5.96    0.44
   4   4   7    5.63    0.28
  -4  -4   7    5.77    0.41
   4   4   7    5.86    0.35
   4   4   7    5.46    0.30
  -4  -4   7    5.95    0.36
   4  -4  -7    5.32    0.30
  -4   4  -7    5.34    0.25
   4   4   7    5.21    0.31
  -4  -4   7    5.73    0.35
   4   5  -7   43.22    1.37
  -4   5   7   42.01    1.28
  -4  -5  -7   44.80    1.19
   4  -5   7   44.66    1.17
  -4   5   7   45.51    1.18
   4   5  -7   44.03    1.26
  -4   5   7   43.82    1.14
   4  -5  -7   42.89    1.36
  -4  -5   7   45.04    1.27
   4   5   7   43.05    1.20
   4   5   7   42.82    1.15
  -4   5  -7   44.19    1.26
   4   5   7   47.26    1.19
  -4   5  -7   43.93    1.14
  -4   5  -7   43.12    1.16
   4   5   7   43.92    1.23
  -4   6   7   46.89    1.22
   4   6  -7   47.47    1.36
  -4   6   7   48.83    1.29
   4   6  -7   44.70    1.45
   4   6  -7   47.37    1.30
  -4   6   7   48.90    1.40
  -4  -6   7   48.46    1.37
   4   6   7   47.95    1.24
  -4   6  -7   46.13    1.15
   4   6   7   46.01    1.33
  -4   6  -7   47.66    1.37
  -4   6  -7   45.45    1.24
  -4   6  -7   45.50    1.27
   4   6   7   46.93    1.31
   4  -6  -7   46.63    1.44
   4   7  -7   41.93    1.25
  -4   7   7   41.82    1.18
  -4   7   7   41.15    1.27
   4  -7   7   40.47    1.28
  -4   7   7   39.87    1.13
   4   7  -7   41.81    1.21
   4   7   7   38.90    1.19
   4   7   7   40.93    1.14
  -4  -7   7   40.17    1.22
  -4   7  -7   40.55    1.05
  -4   7  -7   41.37    1.26
   4  -7  -7   41.65    1.33
   4   7   7   40.34    1.22
   4   8  -7   41.63    1.40
   4  -8   7   42.14    1.33
   4   8  -7   44.51    1.31
  -4   8   7   40.11    1.17
  -4   8   7   42.12    1.24
  -4   8   7   40.70    1.31
   4   8  -7   43.55    1.26
   4  -8  -7   41.49    1.36
  -4   8  -7   42.71    1.09
   4   8   7   41.34    1.28
  -4  -8   7   42.00    1.27
   4   8   7   40.19    1.25
  -4   8  -7   41.98    1.30
   4   8   7   41.89    1.19
   4  -9   7   22.20    0.90
   4   9  -7   21.08    0.81
  -4   9   7   20.91    0.80
   4   9  -7   22.09    0.85
  -4   9   7   21.03    0.85
  -4   9   7   21.66    0.80
   4   9   7   21.01    0.81
   4  -9  -7   20.93    0.89
  -4   9  -7   19.98    0.68
  -4  -9   7   21.37    0.83
   4   9   7   19.72    0.77
  -4   9  -7   21.84    0.87
   4   9   7   20.30    0.82
  -4  10   7    6.83    0.53
  -4  10   7    6.48    0.51
   4 -10   7    6.60    0.59
  -4  10   7    6.90    0.48
   4  10  -7    6.34    0.51
   4  10   7    5.94    0.48
  -4 -10   7    7.24    0.54
  -4  10  -7    7.65    0.44
  -4  10  -7    6.90    0.56
   4  10   7    6.52    0.50
   4  10   7    6.67    0.51
  -4  11   7   19.32    0.82
   4 -11   7   20.23    0.93
  -4  11   7   19.89    0.89
   4  11  -7   20.74    0.87
  -4  11   7   20.10    0.82
   4  11   7   20.05    0.86
   4  11   7   20.44    0.82
  -4 -11   7   19.98    0.84
   4  11   7   19.06    0.83
  -4  11  -7   19.44    0.88
  -4  12   7   13.24    0.74
  -4  12   7   12.31    0.69
   4 -12   7   14.24    0.89
  -4  12   7   13.70    0.72
   4  12   7   14.38    0.72
   4  12   7   13.30    0.74
   4  12   7   13.15    0.71
  -4 -12   7   14.15    0.74
  -4  12  -7   14.82    0.80
   4   0  -8  115.53    2.89
  -4   0   8  115.03    2.87
  -4   0   8  117.55    2.88
  -4   0   8  114.38    2.89
   4   0  -8  116.97    3.05
  -4   0  -8  118.61    2.94
   4   0   8  114.80    2.82
   4   1  -8   51.36    1.41
   4  -1   8   51.94    1.41
  -4   1   8   52.16    1.43
  -4   1   8   52.43    1.41
  -4   1   8   50.92    1.41
  -4  -1  -8   53.47    1.40
   4   1  -8   52.95    1.53
  -4   1  -8   52.06    1.44
   4  -1  -8   54.69    1.43
  -4   1  -8   52.70    1.38
  -4  -1   8   52.93    1.40
   4  -1  -8   54.19    1.54
   4   1   8   50.67    1.37
  -4  -1   8   50.79    1.41
   4  -2   8  111.72    2.75
  -4   2   8  110.08    2.80
  -4  -2  -8  109.73    2.79
  -4   2   8  111.71    2.76
   4   2  -8  108.64    2.94
   4   2  -8  110.21    2.78
  -4   2   8  116.30    2.80
   4   2   8  111.23    2.61
  -4   2  -8  109.88    2.74
   4   2   8  111.65    2.67
  -4  -2   8  108.07    2.77
  -4  -2   8  115.01    2.78
  -4   2  -8  109.41    2.87
   4   2   8  112.71    2.67
   4  -2  -8  111.96    2.94
  -4   3   8   37.15    1.09
   4   3  -8   35.99    1.05
  -4   3   8   35.59    1.07
   4  -3   8   36.15    1.10
  -4   3   8   38.44    1.08
   4   3  -8   35.48    1.16
  -4  -3  -8   36.04    1.00
  -4  -3   8   37.80    1.05
   4   3   8   35.77    0.94
  -4  -3   8   35.17    1.09
  -4  -3   8   35.91    0.92
   4  -3  -8   34.75    0.90
   4  -3  -8   35.54    1.16
  -4   3  -8   36.64    1.04
   4   3   8   35.80    0.96
  -4  -3   8   36.41    1.02
   4   4  -8   15.84    0.74
   4  -4   8   17.08    0.71
  -4  -4  -8   17.68    0.57
   4  -4   8   17.57    0.50
  -4   4   8   17.11    0.56
  -4   4   8   16.19    0.64
   4   4  -8   16.52    0.62
  -4   4   8   17.35    0.67
  -4  -4   8   18.58    0.62
  -4   4  -8   16.70    0.63
  -4  -4   8   18.06    0.63
   4  -4  -8   17.36    0.75
   4  -4  -8   17.56    0.54
   4   4   8   16.55    0.57
  -4   4  -8   16.40    0.49
   4   4   8   17.68    0.56
  -4  -4   8   17.41    0.69
   4  -5   8    9.38    0.38
   4   5  -8    9.42    0.59
  -4   5   8    8.81    0.44
  -4  -5  -8    9.94    0.42
  -4   5   8    9.02    0.49
   4   5  -8    9.80    0.49
  -4  -5   8    8.80    0.52
   4   5   8    9.37    0.44
   4   5   8    8.52    0.41
   4  -5  -8    9.95    0.60
   4   5   8    8.98    0.43
  -4   5  -8   10.05    0.51
   4   6  -8   21.30    0.70
  -4   6   8   19.95    0.68
  -4   6   8   20.55    0.66
  -4   6   8   18.96    0.75
   4   6  -8   19.66    0.73
   4   6  -8   18.79    0.81
   4  -6   8   20.01    0.80
   4   6   8   19.15    0.69
   4  -6  -8   20.05    0.84
  -4   6  -8   20.16    0.75
  -4  -6   8   19.29    0.75
   4   6   8   19.46    0.68
   4   6   8   20.16    0.69
   4   7  -8    2.01    0.34
  -4   7   8    2.53    0.31
   4   7  -8    2.93    0.30
   4   7  -8    2.26    0.31
   4  -7   8    3.11    0.41
  -4   7   8    3.01    0.32
  -4   7   8    2.84    0.28
  -4   7  -8    3.03    0.34
   4   7   8    2.28    0.30
  -4  -7   8    2.52    0.35
   4  -7  -8    2.56    0.38
   4   7   8    2.47    0.29
   4   7   8    2.26    0.28
  -4   8   8   15.38    0.69
  -4   8   8   13.91    0.59
   4  -8   8   12.90    0.71
  -4   8   8   13.88    0.61
   4   8  -8   14.60    0.74
   4   8  -8   16.18    0.65
   4   8   8   14.13    0.63
  -4  -8   8   14.10    0.68
   4   8   8   13.42    0.62
  -4   8  -8   14.15    0.67
   4  -8  -8   15.07    0.74
   4   8   8   14.40    0.61
  -4   9   8   30.06    1.09
   4   9  -8   29.31    1.01
   4   9  -8   28.70    1.15
   4  -9   8   30.79    1.12
  -4   9   8   28.98    0.97
  -4   9   8   30.03    1.00
  -4  -9   8   30.48    1.06
   4   9   8   32.04    1.00
   4  -9  -8   32.06    1.14
   4   9   8   29.00    1.03
   4   9   8   28.33    1.00
  -4   9  -8   28.57    1.04
  -4  10   8    3.94    0.42
  -4  10   8    3.59    0.37
   4  10  -8    3.63    0.41
  -4  10   8    3.34    0.42
   4  10  -8    3.70    0.48
   4 -10   8    3.97    0.53
   4  10   8    3.38    0.41
  -4  10  -8    3.43    0.44
   4  10   8    3.61    0.40
   4  10   8    3.20    0.39
  -4 -10   8    3.49    0.44
   4 -11   8   27.33    1.13
   4  11  -8   29.50    1.19
  -4  11   8   28.41    1.02
  -4  11   8   27.65    1.10
   4  11   8   28.41    1.06
  -4  11  -8   28.35    1.09
  -4 -11   8   27.14    1.05
   4  11   8   28.13    1.02
   4  11   8   27.06    1.03
  -4  12   8    3.54    0.45
   4  12  -8    2.82    0.46
   4 -12   8    2.76    0.56
  -4  12   8    3.10    0.46
   4  12   8    2.34    0.40
   4  12   8    3.05    0.44
  -4 -12   8    2.93    0.46
   4  12   8    2.66    0.41
  -4  12  -8    2.32    0.44
  -4   0   9   40.04    1.14
  -4   0   9   39.68    1.19
  -4   0  -9   39.81    1.15
   4   0   9   42.48    1.17
  -4   0  -9   39.26    1.10
  -4   0   9   41.86    1.14
   4   0  -9   37.67    1.13
   4   0  -9   39.01    1.25
  -4  -1  -9   13.01    0.50
   4  -1   9   12.05    0.59
  -4   1   9   11.27    0.57
   4   1  -9   13.98    0.63
  -4   1   9   12.32    0.51
   4   1  -9   13.99    0.52
  -4   1   9   12.64    0.52
  -4  -1   9   12.37    0.51
  -4   1  -9   13.22    0.51
  -4   1  -9   13.09    0.53
  -4  -1   9   12.56    0.50
   4   1   9   11.35    0.52
   4  -1  -9   13.14    0.64
  -4   2   9   29.90    0.92
  -4   2   9   29.63    0.91
   4   2  -9   29.99    1.03
   4  -2   9   29.11    0.96
  -4   2   9   28.92    0.96
  -4  -2  -9   30.84    0.89
   4   2  -9   28.72    0.89
   4   2   9   29.63    0.77
   4   2   9   29.57    0.90
  -4  -2   9   28.63    0.89
  -4   2  -9   31.07    0.89
   4   2   9   30.38    0.77
   4  -2  -9   29.98    1.02
   4   2   9   28.56    0.75
  -4  -2   9   29.93    0.89
  -4   2  -9   30.83    0.96
   4   3  -9   37.87    1.24
  -4   3   9   37.04    1.14
  -4   3   9   37.20    1.12
   4  -3   9   36.82    1.15
  -4  -3  -9   37.27    1.06
   4   3  -9   36.84    1.09
   4   3   9   39.29    1.00
  -4   3  -9   38.42    1.17
   4   3   9   36.50    0.97
   4   3   9   36.74    1.06
  -4   3  -9   38.29    1.09
   4   3   9   37.70    1.00
  -4  -3   9   37.10    1.16
   4  -3  -9   38.18    1.21
   4   4  -9   10.44    0.50
   4  -4   9   11.22    0.33
   4   4  -9   11.09    0.60
   4  -4   9    9.85    0.60
  -4   4   9   10.29    0.50
  -4   4   9   10.17    0.54
  -4  -4  -9   11.65    0.48
  -4   4   9   10.54    0.45
  -4  -4   9   10.29    0.56
   4  -4  -9   11.22    0.60
  -4   4  -9   10.21    0.52
   4   4   9   10.64    0.42
   4   4   9   10.63    0.41
   4   4   9   10.26    0.46
  -4   5   9   32.61    1.08
  -4   5   9   35.00    0.95
   4   5  -9   33.92    1.18
  -4   5   9   34.36    1.09
   4   5  -9   34.56    1.06
  -4  -5  -9   35.06    1.00
   4  -5   9   33.96    1.12
  -4  -5   9   33.73    1.10
  -4   5  -9   36.58    1.07
   4   5   9   35.13    0.99
   4  -5  -9   35.35    1.18
   4   5   9   33.89    1.00
  -4   6   9   44.26    1.17
   4  -6   9   40.72    1.33
   4   6  -9   46.33    1.44
  -4   6   9   42.51    1.29
  -4   6   9   43.22    1.32
  -4  -6  -9   45.00    1.22
   4   6   9   43.60    1.19
   4  -6  -9   44.84    1.41
  -4   6  -9   46.04    1.31
   4   6   9   42.11    1.22
  -4  -6   9   42.97    1.33
   4   6   9   41.80    1.25
   4  -7   9    5.67    0.51
  -4   7   9    5.18    0.46
   4   7  -9    4.72    0.46
  -4   7   9    5.53    0.43
  -4   7   9    5.65    0.42
   4   7   9    5.59    0.42
  -4  -7   9    6.46    0.52
   4   7   9    6.12    0.41
  -4   7  -9    5.80    0.45
   4   7   9    6.21    0.40
   4  -7  -9    4.80    0.47
   4   8  -9   33.72    1.27
  -4   8   9   34.17    1.18
   4  -8   9   34.99    1.24
  -4   8   9   35.62    1.07
   4   8   9   35.12    1.13
  -4   8  -9   37.24    1.19
   4   8   9   35.32    1.11
  -4  -8   9   35.24    1.17
   4  -8  -9   36.47    1.26
   4   8   9   34.65    1.08
  -4   9   9   21.30    0.80
   4   9  -9   20.83    0.97
   4  -9   9   21.05    0.94
  -4   9   9   21.73    0.90
  -4  -9   9   20.48    0.89
  -4   9  -9   21.06    0.87
   4  -9  -9   22.85    0.94
   4   9   9   20.89    0.82
   4   9   9   21.27    0.84
   4   9   9   22.49    0.82
   4  10  -9    5.83    0.59
  -4  10   9    8.03    0.56
   4 -10   9    7.21    0.64
  -4  10   9    7.40    0.57
   4  10   9    6.24    0.51
   4  10   9    7.58    0.51
   4  10   9    7.10    0.51
   4 -10  -9    7.34    0.60
  -4  10  -9    7.31    0.56
  -4 -10   9    6.52    0.55
   4  11  -9   22.63    1.05
   4 -11   9   23.38    1.09
  -4  11   9   23.00    0.91
  -4  11   9   25.26    1.03
   4  11   9   22.61    0.91
   4  11   9   22.16    0.92
  -4 -11   9   23.17    0.97
   4  11   9   22.90    0.94
  -4  11  -9   24.12    1.00
   4   0 -10   54.35    1.45
  -4   0 -10   53.62    1.40
  -4   0  10   49.35    1.49
  -4   0  10   50.37    1.43
  -4   0 -10   54.07    1.48
   4   0 -10   54.53    1.61
   4   0  10   52.57    1.46
  -4   1  10   46.71    1.26
   4   1 -10   43.39    1.24
  -4   1  10   43.00    1.30
   4   1 -10   41.52    1.39
  -4  -1 -10   44.43    1.27
   4  -1  10   45.35    1.30
  -4   1 -10   44.67    1.21
   4  -1 -10   44.36    1.40
   4   1  10   44.09    1.26
  -4   1 -10   43.52    1.29
  -4  -1  10   45.44    1.25
  -4  -1  10   43.54    1.32
  -4  -2 -10   28.69    0.93
   4   2 -10   30.92    1.09
  -4   2  10   30.73    0.95
  -4   2  10   29.97    1.02
   4  -2  10   30.61    1.02
   4  -2 -10   31.31    1.09
  -4   2 -10   30.97    0.92
  -4   2 -10   30.57    1.00
  -4  -2  10   31.15    1.03
  -4  -2  10   31.01    0.93
   4   2  10   31.46    0.96
  -4   3  10   64.74    1.76
   4   3 -10   62.85    1.91
  -4   3  10   64.29    1.77
   4  -3  10   63.82    1.79
  -4  -3 -10   65.22    1.73
   4   3  10   64.88    1.59
  -4   3 -10   66.34    1.85
   4   3  10   65.88    1.70
  -4   3 -10   65.72    1.71
   4  -3 -10   65.46    1.90
  -4  -3  10   65.61    1.80
  -4  -3  10   62.17    1.72
   4   3  10   66.68    1.63
  -4   4  10   10.90    0.44
  -4  -4 -10   10.58    0.48
  -4   4  10   11.01    0.56
  -4   4  10   11.31    0.53
   4  -4  10   10.55    0.58
   4   4 -10   11.01    0.61
  -4  -4  10   10.62    0.58
   4   4  10   11.42    0.49
   4   4  10   11.54    0.43
   4   4  10   11.27    0.41
   4  -4 -10   11.05    0.63
  -4   4 -10   11.91    0.52
  -4   4 -10   10.99    0.58
  -4   5  10   35.60    0.97
  -4   5  10   35.60    1.12
   4  -5  10   34.90    1.16
   4   5 -10   34.51    1.22
  -4   5  10   33.55    1.10
  -4   5 -10   37.50    1.09
   4   5  10   34.24    0.99
   4   5  10   34.76    1.01
   4  -5 -10   36.37    1.21
  -4  -5  10   33.75    1.14
  -4   6  10   26.99    0.83
   4   6 -10   24.96    1.02
   4  -6  10   28.43    1.03
  -4   6  10   26.02    0.94
  -4   6  10   27.35    0.95
   4   6  10   27.68    0.85
  -4   6 -10   27.94    0.92
   4  -6 -10   26.12    1.03
   4   6  10   28.22    0.87
  -4  -6  10   26.85    0.98
  -4   7  10    3.75    0.38
  -4   7  10    4.17    0.42
  -4   7  10    4.41    0.37
   4   7 -10    3.23    0.43
   4  -7  10    4.17    0.47
  -4   7 -10    3.73    0.39
   4   7  10    4.03    0.37
  -4  -7  10    4.42    0.45
   4  -7 -10    4.66    0.48
   4   7  10    3.91    0.34
   4   7  10    4.37    0.36
   4  -8  10   11.34    0.70
  -4   8  10   11.60    0.61
   4   8 -10   11.91    0.70
  -4   8  10   12.28    0.63
  -4   8  10   11.17    0.57
  -4   8 -10   12.08    0.62
   4   8  10   11.83    0.59
   4   8  10   11.62    0.56
   4  -8 -10   11.95    0.69
   4   8  10   11.37    0.57
  -4  -8  10   12.29    0.69
  -4   9  10    5.57    0.49
  -4   9  10    5.46    0.49
  -4   9  10    5.42    0.46
   4   9 -10    6.44    0.57
   4  -9  10    5.32    0.56
  -4   9 -10    6.25    0.54
   4  -9 -10    5.85    0.55
   4   9  10    5.40    0.46
   4   9  10    4.98    0.45
   4   9  10    4.98    0.44
  -4  -9  10    5.20    0.53
  -4  10  10    3.39    0.42
   4  10 -10    3.80    0.49
  -4  10  10    3.95    0.44
   4 -10  10    2.93    0.55
  -4  10  10    3.08    0.42
  -4  10 -10    3.85    0.45
   4 -10 -10    3.70    0.47
   4  10  10    3.75    0.41
   4  10  10    3.01    0.42
  -4 -10  10    3.23    0.49
   4  10  10    3.37    0.39
  -4  11  10   12.00    0.66
   4 -11  10   12.59    0.84
  -4 -11  10   13.24    0.75
   4  11  10   12.75    0.68
   4   0 -11   76.02    2.20
  -4   0 -11   78.23    1.97
  -4   0  11   76.11    2.09
  -4   0 -11   82.50    2.11
   4   0  11   74.91    2.03
  -4   0  11   76.83    2.03
  -4   1  11    8.67    0.52
  -4  -1 -11   10.11    0.43
  -4   1  11    8.80    0.44
   4  -1  11    8.67    0.53
   4   1 -11    7.89    0.53
  -4  -1 -11    9.02    0.47
  -4   1 -11    9.45    0.50
   4  -1 -11    8.61    0.58
  -4   1 -11    8.84    0.43
  -4  -1  11    8.21    0.42
   4   1  11    9.16    0.49
  -4  -1  11    7.62    0.54
   4  -2  11   49.72    1.51
  -4   2  11   51.68    1.52
  -4   2  11   51.72    1.46
   4   2 -11   51.87    1.63
  -4  -2 -11   54.34    1.47
  -4  -2  11   50.97    1.54
   4  -2 -11   53.04    1.62
  -4  -2  11   51.53    1.44
   4   2  11   53.34    1.45
  -4   2 -11   54.44    1.42
  -4   2 -11   52.87    1.53
   4   3 -11   21.18    0.90
  -4   3  11   21.00    0.81
   4  -3  11   21.13    0.83
  -4   3  11   22.49    0.76
  -4  -3 -11   19.94    0.73
  -4   3 -11   21.52    0.82
  -4  -3  11   21.47    0.83
  -4   3 -11   21.24    0.73
   4   3  11   22.58    0.75
   4  -3 -11   21.01    0.87
  -4  -3  11   20.46    0.72
   4   3  11   20.93    0.59
   4   3  11   21.71    0.60
   4  -4  11    1.69    0.34
  -4   4  11    1.46    0.32
  -4   4  11    1.20    0.25
   4   4 -11    1.26    0.34
   4   4  11    0.91    0.26
  -4   4 -11    1.39    0.30
  -4  -4  11    1.05    0.32
   4   4  11    1.22    0.17
  -4   4 -11    1.27    0.25
  -4  -4  11    1.53    0.23
   4   4  11    1.27    0.18
   4  -4 -11    1.55    0.34
  -4   5  11   14.48    0.54
  -4   5  11   14.42    0.62
   4  -5  11   14.42    0.72
   4   5 -11   15.06    0.77
  -4   5  11   13.79    0.65
  -4  -5  11   13.85    0.71
  -4   5 -11   15.68    0.63
   4   5  11   14.33    0.51
  -4   5 -11   13.38    0.69
   4  -5 -11   13.99    0.73
   4   5  11   13.71    0.52
  -4   6  11   13.39    0.54
  -4   6  11   12.33    0.60
  -4   6  11   13.13    0.65
   4   6 -11   12.92    0.74
   4  -6  11   13.68    0.71
  -4   6 -11   12.96    0.70
   4   6  11   12.76    0.52
   4   6  11   12.96    0.54
   4  -6 -11   13.07    0.74
  -4  -6  11   12.51    0.67
  -4   6 -11   13.20    0.60
  -4   7  11    9.25    0.56
  -4   7  11    8.88    0.50
   4  -7  11    8.74    0.63
   4   7 -11    9.41    0.66
  -4   7  11    8.45    0.54
   4   7  11    8.39    0.45
  -4   7 -11    8.75    0.55
   4   7  11    8.67    0.47
  -4  -7  11    9.40    0.64
   4  -7 -11    8.09    0.61
   4   8 -11   24.11    1.04
  -4   8  11   23.58    0.93
   4  -8  11   24.26    1.02
  -4   8  11   23.40    0.84
  -4   8  11   23.75    0.92
   4   8  11   23.23    0.86
   4   8  11   25.28    0.87
   4  -8 -11   23.75    1.00
  -4   8 -11   23.88    0.92
   4   8  11   24.01    0.85
  -4  -8  11   24.02    0.98
  -4   9  11   24.08    0.96
   4   9 -11   22.52    1.06
  -4   9  11   24.96    0.89
  -4   9  11   23.55    0.93
   4  -9  11   23.51    1.04
  -4   9 -11   23.06    0.94
   4   9  11   23.56    0.89
   4   9  11   23.21    0.88
   4  -9 -11   23.18    1.01
   4   9  11   23.45    0.87
  -4  -9  11   23.57    1.01
  -4  10  11    6.43    0.53
  -4  10  11    7.15    0.55
   4 -10  11    5.85    0.66
   4  10 -11    6.46    0.65
  -4  10  11    6.47    0.57
   4  10  11    6.68    0.53
   4 -10 -11    7.85    0.63
   4  10  11    5.95    0.49
  -4 -10  11    7.04    0.61
   4  10  11    6.96    0.50
  -4  10 -11    6.75    0.59
  -4   0 -12   58.87    1.66
  -4   0  12   55.02    1.67
   4   0  12   59.74    1.65
  -4   0  12   56.63    1.57
   4   0 -12   58.67    1.78
  -4  -1 -12    8.60    0.50
   4  -1  12    8.94    0.56
  -4   1  12    9.13    0.55
  -4   1  12    9.24    0.46
   4   1 -12    8.81    0.61
   4  -1 -12    9.00    0.59
  -4  -1  12    8.70    0.55
   4   1  12    9.35    0.53
  -4  -1  12    9.03    0.43
  -4   1 -12    8.77    0.50
   4   2 -12   32.84    1.22
   4  -2  12   34.53    1.16
  -4  -2 -12   34.98    1.10
  -4   2  12   35.68    1.16
  -4   2  12   36.47    1.09
  -4  -2  12   35.44    1.05
   4  -2 -12   36.17    1.25
  -4  -2  12   36.00    1.20
   4   2  12   37.48    1.11
  -4   2 -12   33.93    1.15
  -4   3  12   29.40    0.95
  -4   3  12   29.13    1.03
   4   3 -12   28.01    1.09
   4  -3  12   28.93    1.04
   4  -3 -12   30.43    1.10
  -4  -3  12   27.72    0.89
  -4   3 -12   29.34    1.04
   4   3  12   28.28    0.73
   4   3  12   29.75    0.95
   4   3  12   30.00    0.76
  -4  -3  12   26.38    1.02
   4   4 -12    4.62    0.50
   4  -4  12    5.12    0.48
  -4   4  12    3.86    0.36
  -4   4  12    4.63    0.44
  -4  -4  12    3.98    0.45
  -4   4 -12    4.49    0.43
  -4  -4  12    4.69    0.35
   4   4  12    4.50    0.40
   4  -4 -12    3.87    0.47
   4   4  12    4.09    0.26
   4   4  12    4.51    0.26
  -4   5  12   19.42    0.77
   4   5 -12   20.27    0.93
   4  -5  12   19.44    0.89
  -4   5  12   20.24    0.83
   4   5  12   20.79    0.65
   4  -5 -12   21.69    0.91
   4   5  12   20.56    0.67
  -4  -5  12   20.33    0.88
  -4  -5  12   19.72    0.73
  -4   5 -12   20.65    0.87
  -4   6  12   13.74    0.56
   4   6 -12   14.72    0.78
   4  -6  12   14.60    0.76
  -4   6  12   14.23    0.66
  -4   6  12   13.93    0.69
   4  -6 -12   14.04    0.75
   4   6  12   14.04    0.54
   4   6  12   14.25    0.56
  -4  -6  12   13.83    0.75
  -4   6 -12   13.53    0.74
  -4   7  12    5.17    0.41
  -4   7  12    5.43    0.45
   4   7 -12    4.21    0.52
  -4   7  12    5.44    0.50
   4  -7  12    5.24    0.56
  -4  -7  12    5.35    0.54
   4   7  12    5.32    0.38
   4  -7 -12    5.35    0.52
   4   7  12    5.18    0.38
  -4   7 -12    5.16    0.52
  -4   8  12    9.86    0.61
   4   8 -12    9.47    0.72
   4  -8  12   10.52    0.72
  -4   8  12   10.00    0.60
  -4   8  12    9.47    0.55
  -4  -8  12   10.39    0.71
   4   8  12   10.78    0.56
   4  -8 -12   10.66    0.73
   4   8  12   10.56    0.54
  -4   8 -12    9.20    0.69
  -4   9  12    8.05    0.57
   4   9 -12    7.15    0.68
   4  -9  12    8.25    0.71
  -4   9  12    8.59    0.58
  -4   9  12    7.40    0.53
   4   9  12    7.46    0.50
   4  -9 -12    7.79    0.65
   4   9  12    7.13    0.50
  -4  -9  12    7.93    0.68
  -4   0  13   15.66    0.74
  -4   0 -13   15.64    0.69
  -4   0  13   14.44    0.58
   4   0 -13   16.03    0.79
   4   0  13   16.05    0.72
  -4   1  13    8.33    0.44
   4  -1  13    9.19    0.56
  -4   1  13    7.99    0.56
   4   1 -13    9.19    0.63
  -4  -1  13    8.71    0.60
   4  -1 -13    8.86    0.62
   4   1  13    8.92    0.54
  -4  -1  13    8.26    0.43
  -4   1 -13    8.66    0.53
   4   2 -13    1.41    0.37
   4  -2  13    1.27    0.34
  -4   2  13    1.57    0.35
  -4   2  13    1.18    0.23
  -4  -2  13    1.39    0.22
   4   2  13    1.72    0.31
  -4  -2  13    1.58    0.35
   4  -2 -13    1.89    0.40
  -4   2 -13    1.62    0.32
   4   3 -13   17.66    0.86
   4  -3  13   20.04    0.85
  -4   3  13   19.62    0.73
  -4   3  13   19.76    0.82
  -4   3 -13   19.20    0.81
   4  -3 -13   18.95    0.87
  -4  -3  13   19.78    0.69
   4   3  13   19.29    0.76
  -4  -3  13   18.98    0.84
   4   4 -13    1.98    0.41
  -4   4  13    1.72    0.28
   4  -4  13    1.97    0.39
  -4   4  13    1.99    0.37
   4   4  13    2.08    0.33
  -4   4 -13    2.15    0.36
  -4  -4  13    1.39    0.38
  -4  -4  13    1.94    0.25
   4  -4 -13    1.49    0.38
   4  -5  13   25.02    1.05
  -4   5  13   26.87    0.93
   4   5 -13   25.87    1.08
  -4   5  13   25.94    0.97
   4  -5 -13   27.28    1.07
  -4  -5  13   25.65    0.86
  -4   5 -13   26.56    1.04
  -4  -5  13   24.78    1.02
   4   5  13   25.51    0.76
   4   5  13   25.82    0.78
   4   6 -13   20.86    0.98
  -4   6  13   21.34    0.83
  -4   6  13   22.61    0.89
   4  -6  13   19.34    0.92
   4  -6 -13   19.73    0.95
   4   6  13   21.00    0.69
  -4  -6  13   20.23    0.91
  -4   6 -13   19.56    0.92
   4   6  13   19.36    0.69
  -4  -6  13   20.12    0.75
   4   7 -13    7.78    0.64
  -4   7  13    8.23    0.54
  -4   7  13    7.25    0.57
   4  -7  13    6.91    0.65
   4   7  13    8.39    0.44
  -4  -7  13    7.40    0.62
  -4   7 -13    7.52    0.63
   4   7  13    8.04    0.45
   4  -7 -13    7.21    0.63
   4   8 -13   22.41    1.06
  -4   8  13   20.96    0.92
  -4   8  13   21.89    0.91
   4  -8  13   22.04    1.06
  -4   8  13   22.68    0.82
   4   8  13   22.63    0.81
   4   8  13   24.20    0.84
  -4   8 -13   22.84    1.04
   4  -8 -13   21.53    1.00
  -4  -8  13   21.70    1.02
  -4   0  14   49.91    1.58
  -4   0  14   50.68    1.42
   4   0 -14   52.75    1.68
   4   0  14   48.99    1.53
   4   1 -14    7.57    0.61
  -4   1  14    9.08    0.45
   4  -1  14    8.52    0.60
  -4   1  14    9.13    0.62
   4  -1 -14    8.76    0.64
   4   1  14    8.98    0.58
  -4  -1  14    8.10    0.59
  -4  -1  14    8.19    0.44
   4   2 -14    9.00    0.67
  -4   2  14   11.05    0.67
   4  -2  14   11.06    0.67
  -4   2  14   11.01    0.51
  -4  -2  14   10.58    0.48
   4  -2 -14    9.57    0.67
  -4  -2  14   10.73    0.66
  -4   2 -14    9.13    0.59
   4   2  14   10.66    0.59
   4   3 -14   20.79    0.98
  -4   3  14   21.95    0.92
   4  -3  14   21.50    0.91
  -4   3  14   21.50    0.78
  -4   3 -14   20.50    0.87
  -4  -3  14   21.80    0.74
  -4  -3  14   20.29    0.92
   4  -3 -14   20.54    0.95
   4   3  14   22.77    0.84
  -4   4  14    6.93    0.57
  -4   4  14    8.26    0.49
   4   4 -14    7.39    0.64
   4  -4  14    6.86    0.59
  -4   4 -14    8.58    0.58
  -4  -4  14    7.44    0.41
  -4  -4  14    6.88    0.61
   4  -4 -14    7.52    0.66
  -4   5  14   10.76    0.56
   4   5 -14    9.97    0.73
  -4   5  14   10.40    0.65
   4  -5  14    9.43    0.68
   4  -5 -14    9.94    0.70
  -4  -5  14    9.40    0.47
  -4   5 -14    9.34    0.64
  -4  -5  14   10.17    0.67
   4  -6  14    7.41    0.67
  -4   6  14    7.21    0.50
  -4   6  14    7.43    0.58
   4   6 -14    7.88    0.65
  -4  -6  14    7.85    0.64
   4  -6 -14    7.63    0.64
  -4  -6  14    6.96    0.44
  -4   6 -14    7.72    0.62
   4   0 -15   29.08    1.17
   4   0  15   29.80    1.09
  -4   0  15   28.67    1.12
  -4   0  15   28.81    0.91
   4  -1  15    6.84    0.57
   4   1 -15    7.03    0.64
  -4   1  15    7.35    0.60
  -4   1  15    7.08    0.42
  -4  -1  15    6.34    0.60
   4   1  15    7.33    0.57
   4  -1 -15    6.67    0.63
  -4  -1  15    6.43    0.39
   4   2 -15   19.19    0.95
   4  -2  15   19.33    0.88
  -4   2  15   18.05    0.86
  -4   2  15   19.32    0.71
   4   2  15   19.16    0.84
   4  -2 -15   18.19    0.92
  -4  -2  15   18.80    0.91
  -4  -2  15   17.96    0.66
  -4   3  15    5.32    0.40
   4  -3  15    4.88    0.55
   4   3 -15    5.42    0.59
  -4   3  15    4.45    0.52
  -4  -3  15    5.35    0.36
   4  -3 -15    4.93    0.55
   4   3  15    5.76    0.51
  -4  -3  15    4.19    0.53
  -4   4  15    2.19    0.31
  -4   4  15    1.37    0.39
   4  -4  15    1.01    0.42
   4   4 -15    2.17    0.46
  -4  -4  15    1.35    0.23
  -4  -4  15    1.16    0.42
   4  -4 -15    0.82    0.41
  -4   4 -15    1.54    0.38
   5   0   0   -0.26    0.10
  -5   0   0   -0.02    0.11
  -5   0   0    0.02    0.11
   5   0   0   -0.07    0.11
  -5   1   0  104.64    2.54
  -5  -1   0  103.06    2.58
   5  -1   0  105.36    2.54
   5  -1   0  106.61    2.61
   5  -1   0  104.19    2.54
  -5   1   0  102.45    2.60
   5   1   0  105.36    2.58
  -5   2   0   67.43    1.73
   5  -2   0   68.90    1.73
   5   2   0   68.31    1.73
  -5   2   0   70.60    1.72
   5  -2   0   69.23    1.79
   5  -2   0   70.03    1.73
  -5   2   0   68.86    1.78
   5   2   0   70.00    1.74
   5  -3   0    7.35    0.39
  -5   3   0    7.99    0.35
   5   3   0    7.76    0.30
   5  -3   0    7.23    0.32
  -5   3   0    7.91    0.34
   5   4   0   56.46    1.48
  -5   4   0   53.53    1.47
  -5   4   0   57.74    1.48
   5   4   0   57.15    1.45
   5  -4   0   56.11    1.54
  -5   5   0   71.07    1.89
  -5   5   0   71.51    1.70
  -5   5   0   74.87    1.89
   5   5   0   73.84    1.87
   5   5   0   73.95    1.91
  -5   6   0   26.80    0.86
   5   6   0   26.62    0.75
   5   6   0   27.27    0.86
  -5   6   0   26.49    0.77
   5   6   0   27.06    0.84
  -5   6   0   27.03    0.85
  -5   7   0   66.93    1.83
   5   7   0   67.77    1.84
   5   7   0   66.00    1.62
   5   7   0   69.81    1.82
  -5   7   0   67.08    1.64
  -5   7   0   67.68    1.83
  -5   8   0   -0.14    0.25
  -5   8   0    0.80    0.27
   5   8   0    0.59    0.24
   5   8   0    0.58    0.25
  -5   8   0    1.16    0.27
   5   8   0    0.88    0.25
  -5   9   0   82.88    2.20
  -5   9   0   79.70    1.95
   5   9   0   76.70    2.13
   5   9   0   76.65    2.18
  -5   9   0   78.46    2.16
   5   9   0   80.99    1.94
   5  10   0    3.51    0.40
  -5  10   0    3.71    0.37
  -5  10   0    3.20    0.38
   5  10   0    4.35    0.37
  -5  10   0    3.62    0.39
   5  10   0    4.00    0.40
   5  11   0    5.76    0.49
   5  11   0    5.59    0.50
  -5  11   0    5.53    0.49
  -5  11   0    5.43    0.45
  -5  11   0    5.66    0.50
   5  11   0    6.19    0.45
  -5  12   0    0.93    0.32
   5  12   0    0.99    0.30
  -5  12   0    0.76    0.31
   5  12   0    0.73    0.28
  -5  12   0    0.78    0.33
   5  12   0    0.45    0.28
   5  13   0    4.08    0.48
  -5  13   0    3.43    0.43
  -5  13   0    3.55    0.45
  -5  13   0    3.34    0.45
   5  13   0    3.88    0.47
   5  13   0    3.50    0.41
  -5  14   0    1.41    0.40
  -5  14   0    1.67    0.41
   5  14   0    2.35    0.44
   5  14   0    1.82    0.43
  -5  14   0    1.49    0.42
   5  14   0    2.06    0.40
   5   0   1   -0.41    0.09
  -5   0  -1   -0.26    0.09
   5   0   1    0.02    0.11
  -5   0   1   -0.32    0.10
  -5   0   1   -0.14    0.12
   5   0  -1   -0.39    0.11
   5   0  -1   -0.10    0.13
  -5   0   1   -0.11    0.12
  -5   0  -1   -0.20    0.10
  -5  -1  -1   61.73    1.51
   5   1  -1   61.18    1.54
   5  -1   1   60.97    1.52
   5   1  -1   62.23    1.57
   5  -1   1   60.28    1.51
  -5  -1  -1   62.85    1.52
  -5   1   1   58.83    1.58
   5  -1   1   57.85    1.55
  -5   1   1   61.49    1.50
  -5   1   1   60.07    1.54
   5  -1  -1   63.51    1.59
  -5   1  -1   61.35    1.52
  -5   1  -1   62.82    1.56
  -5  -1   1   59.37    1.53
   5   1   1   59.28    1.52
   5  -1  -1   61.14    1.54
  -5  -1   1   60.56    1.56
  -5   1  -1   62.28    1.52
   5   1   1   59.95    1.51
   5   2  -1  157.06    3.88
  -5   2   1  162.50    3.74
  -5   2   1  158.06    3.91
   5  -2   1  155.97    3.90
   5  -2   1  160.65    3.78
   5   2  -1  152.33    3.80
  -5   2   1  159.32    3.81
   5   2   1  161.76    3.83
  -5   2  -1  160.61    3.76
   5   2   1  157.42    3.79
   5  -2  -1  157.97    3.92
  -5   2  -1  150.64    3.78
  -5  -2   1  161.31    3.88
  -5   2  -1  155.79    3.78
  -5   2  -1  160.54    3.90
   5  -2  -1  152.54    3.80
   5  -3   1   44.21    1.19
  -5   3   1   45.38    1.19
   5   3  -1   45.90    1.22
  -5   3   1   45.25    1.22
   5   3   1   47.91    1.17
   5  -3  -1   45.67    1.27
  -5   3  -1   43.88    1.19
   5   3   1   47.00    1.21
  -5   3  -1   45.02    1.21
   5   3   1   46.51    1.19
  -5   4   1  178.42    4.20
   5   4  -1  178.77    4.27
  -5   4   1  173.66    4.26
   5  -4   1  172.09    4.24
   5   4   1  173.26    4.17
  -5   4  -1  178.31    4.25
  -5   4  -1  178.37    4.21
   5  -4  -1  172.88    4.39
   5   4   1  173.26    4.25
   5   5  -1   10.46    0.45
  -5   5   1   11.14    0.45
   5   5  -1   10.76    0.44
  -5   5   1   10.95    0.42
  -5   5   1   10.55    0.46
  -5   5  -1   10.38    0.44
  -5   5  -1    9.65    0.47
  -5   5  -1   10.24    0.41
   5  -5  -1   10.64    0.49
   5   5   1   10.42    0.41
   5   5   1   10.84    0.44
   5   5   1   11.00    0.44
  -5   6   1   31.97    0.90
   5   6  -1   33.36    0.88
   5   6  -1   33.82    1.01
   5   6  -1   34.52    0.99
  -5   6   1   32.67    1.01
  -5   6   1   32.89    0.99
   5   6   1   33.46    1.00
   5   6   1   31.87    0.88
  -5   6  -1   32.89    0.99
   5   6   1   32.68    0.98
  -5   6  -1   32.63    1.00
  -5   6  -1   32.99    0.90
   5   7  -1   78.16    1.83
  -5   7   1   79.93    2.09
  -5   7   1   74.89    2.05
   5   7  -1   79.05    2.05
   5   7  -1   78.12    2.08
  -5   7   1   76.95    1.86
  -5   7  -1   77.54    2.07
  -5   7  -1   78.58    2.07
   5   7   1   80.11    1.86
  -5   7  -1   79.92    1.86
   5   7   1   75.63    2.03
   5   7   1   75.62    2.07
   5   8  -1   17.23    0.68
  -5   8   1   15.82    0.68
   5   8  -1   16.79    0.60
  -5   8   1   14.61    0.63
  -5   8   1   14.34    0.68
   5   8  -1   16.42    0.66
   5   8   1   16.36    0.68
   5   8   1   16.38    0.69
  -5   8  -1   16.68    0.63
  -5   8  -1   16.37    0.65
  -5   8  -1   14.75    0.67
   5   8   1   14.87    0.59
   5   9  -1    1.61    0.30
  -5   9   1    2.79    0.35
  -5   9   1    2.42    0.35
   5   9  -1    2.64    0.32
   5   9  -1    2.20    0.32
  -5   9   1    2.89    0.34
  -5   9  -1    2.61    0.35
  -5   9  -1    2.41    0.32
  -5   9  -1    2.34    0.36
   5   9   1    1.92    0.31
   5   9   1    2.59    0.31
   5   9   1    1.94    0.31
  -5  10   1   74.75    2.12
  -5  10   1   79.02    2.17
   5  10  -1   76.31    2.11
  -5  10   1   76.26    1.93
   5  10  -1   77.88    1.90
   5  10  -1   75.20    2.15
  -5  10  -1   77.04    1.92
   5  10   1   74.08    2.15
  -5  10  -1   75.19    2.14
   5  10   1   79.37    1.92
  -5  10  -1   78.17    2.16
   5  10   1   74.60    2.10
   5  11  -1    1.91    0.32
  -5  11   1    1.57    0.33
   5  11  -1    1.93    0.34
  -5  11   1    1.40    0.35
   5  11  -1    1.02    0.31
  -5  11   1    1.81    0.35
  -5  11  -1    1.92    0.34
   5  11   1    1.56    0.32
   5  11   1    1.61    0.31
  -5  11  -1    1.39    0.33
   5  11   1    1.43    0.31
  -5  11  -1    1.00    0.31
  -5  12   1   10.17    0.59
  -5  12   1   10.09    0.65
  -5  12   1   10.22    0.61
   5  12  -1    9.92    0.64
   5  12  -1   10.30    0.63
   5  12  -1    9.70    0.54
   5  12   1   10.13    0.62
  -5  12  -1    9.74    0.56
  -5  12  -1    9.52    0.59
   5  12   1    9.82    0.56
  -5  12  -1    9.97    0.66
   5  12   1    9.22    0.62
  -5  13   1    6.10    0.53
  -5  13   1    7.34    0.60
   5  13  -1    7.54    0.57
  -5  13   1    6.73    0.61
   5  13  -1    8.42    0.58
   5  13  -1    6.95    0.53
  -5  13  -1    6.43    0.59
  -5  13  -1    6.52    0.58
   5  13   1    7.08    0.55
   5  13   1    7.33    0.59
  -5  13  -1    7.81    0.57
   5  13   1    7.37    0.60
   5  14  -1    7.32    0.61
   5  14  -1    6.04    0.58
   5  14  -1    6.23    0.54
  -5  14   1    5.34    0.57
  -5  14   1    5.37    0.54
  -5  14   1    6.13    0.61
  -5  14  -1    6.39    0.56
   5  14   1    6.08    0.59
   5  14   1    6.06    0.56
  -5  14  -1    5.05    0.59
   5  14   1    6.30    0.59
   5   0  -2    0.04    0.14
   5   0  -2   -0.05    0.12
  -5   0   2   -0.04    0.12
  -5   0  -2   -0.09    0.08
  -5   0   2   -0.26    0.09
  -5   0  -2   -0.09    0.09
   5   0   2   -0.12    0.08
  -5   0   2   -0.06    0.11
  -5   1   2  297.02    6.66
  -5   1   2  284.67    6.78
   5   1  -2  281.58    6.79
   5  -1   2  291.08    6.74
  -5   1   2  285.67    6.79
   5   1  -2  292.63    6.97
   5  -1   2  296.10    6.74
  -5   1   2  287.14    6.97
  -5  -1  -2  275.31    6.74
  -5  -1  -2  284.98    6.89
   5   1   2  280.26    6.75
  -5   1  -2  288.72    6.74
   5   1   2  278.43    6.88
   5  -1  -2  288.86    6.79
   5  -1  -2  284.80    6.98
  -5  -1   2  285.29    6.96
   5  -1  -2  283.20    6.79
  -5   1  -2  286.27    6.93
  -5   1  -2  282.92    6.74
  -5  -1   2  282.88    6.78
  -5   2   2  161.85    3.80
   5   2  -2  166.63    3.98
   5  -2   2  163.26    3.84
  -5  -2  -2  158.98    3.85
   5   2  -2  160.95    3.88
  -5   2   2  155.44    3.88
  -5  -2  -2  161.71    3.77
  -5   2  -2  161.42    3.83
  -5  -2   2  160.74    3.88
   5   2   2  159.14    3.87
   5   2   2  157.95    3.85
  -5  -2   2  159.91    3.97
   5  -2  -2  165.26    3.80
  -5   2  -2  162.51    3.97
  -5   2  -2  157.61    3.83
  -5   2  -2  161.73    3.84
   5  -2  -2  156.29    3.88
  -5   3   2   51.10    1.29
   5  -3   2   49.97    1.29
   5   3  -2   51.75    1.34
   5   3  -2   52.04    1.36
  -5   3   2   47.97    1.33
  -5   3  -2   49.37    1.29
   5   3   2   49.32    1.28
   5  -3  -2   49.54    1.28
   5   3   2   50.97    1.26
   5  -3  -2   51.01    1.40
  -5   3  -2   49.23    1.32
   5   3   2   49.90    1.31
   5   4  -2    5.85    0.35
   5  -4   2    6.72    0.33
  -5   4   2    6.85    0.36
   5   4  -2    5.82    0.34
  -5   4   2    7.04    0.35
   5  -4  -2    5.83    0.38
  -5   4  -2    5.59    0.30
   5   4   2    6.86    0.31
  -5   4  -2    5.56    0.34
   5   4   2    6.48    0.31
   5  -5   2   94.96    2.34
   5   5  -2   93.37    2.33
  -5   5   2   93.16    2.32
   5  -5   2   93.83    2.31
  -5   5   2   91.65    2.12
  -5   5   2   92.98    2.38
   5   5  -2   91.13    2.37
   5   5   2   94.27    2.36
   5  -5  -2   91.38    2.45
   5   5   2   91.24    2.11
  -5   5  -2   96.86    2.36
  -5   5  -2   89.76    2.10
  -5   5  -2   89.71    2.33
   5   5   2   96.35    2.32
   5   6  -2   37.27    1.09
  -5   6   2   36.76    1.10
   5   6  -2   37.31    0.94
  -5   6   2   36.51    1.08
   5   6  -2   38.70    1.08
  -5   6   2   36.20    0.98
  -5   6  -2   36.89    0.98
   5   6   2   35.07    1.08
   5   6   2   36.56    0.97
   5  -6  -2   37.41    1.15
   5   6   2   35.79    1.06
  -5   6  -2   36.12    1.07
  -5   7   2   65.17    1.79
   5   7  -2   65.41    1.79
   5   7  -2   67.41    1.83
   5   7  -2   67.05    1.59
  -5   7   2   68.31    1.84
  -5   7   2   66.24    1.64
  -5   7  -2   65.87    1.62
  -5   7  -2   64.67    1.81
  -5   7  -2   67.35    1.80
   5   7   2   67.45    1.83
   5   7   2   67.44    1.63
   5   7   2   68.30    1.79
  -5   8   2   18.98    0.77
  -5   8   2   18.54    0.75
   5   8  -2   21.05    0.77
   5   8  -2   21.38    0.79
  -5   8   2   19.70    0.71
   5   8  -2   19.87    0.66
   5   8   2   18.08    0.74
   5   8   2   18.77    0.68
   5   8   2   19.49    0.77
  -5   8  -2   19.57    0.75
  -5   8  -2   19.01    0.77
  -5   8  -2   19.72    0.69
   5   9  -2   64.66    1.58
   5   9  -2   65.21    1.82
  -5   9   2   61.28    1.78
  -5   9   2   63.64    1.83
   5   9  -2   64.51    1.78
  -5   9   2   64.35    1.64
  -5   9  -2   64.48    1.61
   5   9   2   60.41    1.76
   5   9   2   62.39    1.62
  -5   9  -2   65.51    1.81
  -5   9  -2   64.73    1.83
  -5  -9   2   60.39    1.62
   5   9   2   60.88    1.80
  -5  10   2    0.27    0.27
   5  10  -2    0.36    0.27
   5  10  -2    0.04    0.23
  -5  10   2    0.08    0.25
   5  10  -2    0.24    0.25
  -5  10   2    0.04    0.26
  -5  10  -2    0.18    0.23
   5  10   2    0.32    0.26
   5  10   2    0.35    0.26
  -5  10  -2    0.33    0.27
   5  10   2   -0.20    0.25
  -5  10  -2    0.27    0.28
  -5  11   2    1.71    0.35
   5  11  -2    2.06    0.32
   5  11  -2    1.70    0.35
   5  11  -2    2.43    0.37
  -5  11   2    2.23    0.35
  -5  11   2    2.19    0.37
  -5  11  -2    2.28    0.39
  -5  11  -2    2.04    0.33
   5  11   2    1.62    0.33
   5  11   2    1.49    0.32
  -5  11  -2    2.17    0.34
   5  11   2    2.02    0.33
   5  12  -2    5.03    0.43
  -5  12   2    5.35    0.48
   5  12  -2    5.82    0.51
   5  12  -2    5.60    0.52
  -5  12   2    5.00    0.47
  -5  12   2    5.83    0.53
  -5  12  -2    5.15    0.50
  -5  12  -2    5.36    0.50
   5  12   2    5.78    0.49
   5  12   2    5.50    0.47
  -5  12  -2    5.17    0.45
   5  12   2    5.55    0.48
   5  13  -2    2.12    0.38
  -5  13   2    2.25    0.40
   5  13  -2    2.21    0.35
   5  13  -2    1.55    0.35
  -5  13   2    1.87    0.38
  -5  13   2    2.00    0.39
  -5  13  -2    1.90    0.36
  -5  13  -2    2.52    0.44
   5  13   2    1.60    0.36
   5  13   2    1.90    0.39
   5  13   2    2.15    0.38
   5   0  -3    0.08    0.12
  -5   0  -3   -0.03    0.07
   5   0  -3    0.02    0.13
   5   0   3    0.00    0.08
  -5   0   3   -0.01    0.12
  -5   0  -3    0.02    0.09
  -5   0   3    0.06    0.10
  -5   0  -3   -0.14    0.07
  -5   1   3   29.08    0.83
  -5  -1  -3   29.86    0.74
  -5  -1  -3   29.25    0.76
   5   1  -3   28.42    0.85
   5   1  -3   27.73    0.82
  -5   1   3   29.09    0.82
   5  -1   3   28.80    0.74
  -5   1   3   31.08    0.76
  -5   1  -3   28.40    0.80
  -5   1  -3   27.83    0.74
   5  -1  -3   29.35    0.86
   5   1   3   29.53    0.76
  -5  -1   3   29.63    0.81
  -5   1  -3   27.96    0.74
   5  -1  -3   28.62    0.82
   5   2  -3  101.38    2.56
   5  -2   3  104.01    2.43
  -5   2   3  105.76    2.41
  -5   2   3  101.75    2.50
   5   2  -3   97.37    2.49
  -5   2  -3   98.71    2.42
   5  -2  -3   97.92    2.49
  -5   2  -3   97.84    2.46
   5  -2  -3   97.41    2.57
  -5   2  -3   98.59    2.42
  -5  -2   3  102.31    2.49
   5   2   3  102.62    2.45
  -5   3   3    5.33    0.31
   5   3  -3    4.86    0.32
   5  -3   3    5.63    0.26
   5   3  -3    6.21    0.35
  -5   3   3    5.85    0.28
   5  -3  -3    5.66    0.36
   5  -3  -3    5.02    0.27
  -5   3  -3    5.16    0.25
   5   3   3    6.12    0.30
  -5   3  -3    5.10    0.31
   5   3   3    5.38    0.28
   5   4  -3  339.11    8.17
   5   4  -3  327.23    7.95
  -5   4   3  333.01    7.80
   5  -4   3  345.28    7.90
  -5   4   3  331.14    7.96
   5   4   3  328.39    7.10
   5   4   3  328.84    7.76
   5   4   3  338.59    8.04
   5   4   3  328.77    7.92
  -5   4  -3  324.01    7.89
   5  -4  -3  337.36    8.20
  -5   4  -3  335.43    7.85
   5  -5   3    5.27    0.42
  -5   5   3    5.87    0.35
   5   5  -3    6.21    0.37
  -5   5   3    5.20    0.34
  -5   5   3    5.55    0.34
   5  -5   3    5.65    0.31
   5   5   3    5.14    0.31
   5   5   3    5.78    0.33
  -5   5  -3    6.17    0.34
  -5   5  -3    6.39    0.37
   5  -5  -3    5.92    0.40
   5   5   3    5.47    0.29
   5   5   3    5.38    0.33
  -5   5  -3    5.65    0.31
   5   6  -3   55.22    1.49
   5   6  -3   54.45    1.46
   5  -6   3   54.91    1.44
  -5   6   3   52.74    1.45
  -5   6   3   52.85    1.49
   5  -6   3   53.21    1.47
  -5   6   3   51.76    1.33
  -5   6  -3   53.88    1.49
   5   6   3   51.88    1.44
   5  -6  -3   53.32    1.55
   5   6   3   51.94    1.32
   5   6   3   52.03    1.47
  -5   6  -3   54.02    1.31
  -5   6  -3   51.76    1.43
   5   7  -3   61.35    1.47
  -5   7   3   61.79    1.54
  -5   7   3   61.51    1.67
   5   7  -3   61.08    1.70
   5   7  -3   60.51    1.67
  -5   7   3   61.12    1.72
  -5  -7   3   62.22    1.57
   5  -7  -3   59.68    1.77
   5   7   3   62.03    1.66
   5   7   3   60.78    1.69
  -5   7  -3   61.51    1.71
   5   7   3   61.58    1.53
  -5   7  -3   60.90    1.67
  -5   7  -3   62.23    1.51
  -5   8   3   12.88    0.58
   5   8  -3   12.62    0.60
  -5   8   3   12.36    0.60
  -5   8   3   11.98    0.58
   5   8  -3   13.15    0.60
   5  -8   3   13.20    0.70
   5   8  -3   13.35    0.51
   5   8   3   13.02    0.57
  -5   8  -3   12.87    0.63
  -5   8  -3   13.24    0.56
   5   8   3   12.75    0.60
  -5  -8   3   12.72    0.55
   5   8   3   12.39    0.60
  -5   8  -3   13.44    0.59
  -5   9   3    5.44    0.43
   5   9  -3    5.24    0.38
  -5   9   3    5.12    0.44
   5   9  -3    5.58    0.43
   5   9  -3    5.50    0.43
  -5   9   3    5.20    0.42
   5   9   3    5.29    0.41
  -5   9  -3    5.27    0.46
   5   9   3    4.74    0.39
   5   9   3    5.17    0.41
  -5   9  -3    5.62    0.44
  -5   9  -3    5.83    0.44
  -5  -9   3    5.85    0.41
   5  10  -3   71.09    2.05
  -5  10   3   71.06    2.02
   5  10  -3   71.81    2.01
   5  10  -3   72.55    1.78
  -5  10   3   70.87    1.85
  -5  10   3   71.33    2.07
  -5  10  -3   70.48    2.05
   5  10   3   72.66    1.85
   5  10   3   71.13    2.01
   5  10   3   71.78    2.05
  -5  10  -3   73.49    2.03
  -5  10  -3   72.87    1.82
  -5 -10   3   74.08    1.87
  -5  11   3    2.39    0.37
   5  11  -3    2.86    0.39
   5  11  -3    1.95    0.35
  -5  11   3    2.21    0.36
  -5  11   3    2.42    0.37
   5  11  -3    2.10    0.31
   5  11   3    2.58    0.38
   5  11   3    2.20    0.36
   5  11   3    2.22    0.35
  -5  11  -3    2.29    0.36
  -5  11  -3    1.61    0.37
  -5  11  -3    2.37    0.35
   5  12  -3   11.62    0.65
  -5  12   3   11.55    0.68
  -5  12   3   10.55    0.64
   5  12  -3   11.15    0.57
   5  12  -3   11.41    0.65
  -5  12   3   11.78    0.63
   5  12   3   11.41    0.66
   5  12   3   11.39    0.62
  -5  12  -3   11.92    0.71
  -5  12  -3   11.11    0.58
   5  12   3   11.18    0.67
   5  13  -3   13.74    0.66
   5  13  -3   14.29    0.79
  -5  13   3   15.32    0.81
   5  13  -3   13.29    0.76
  -5  13   3   13.23    0.74
  -5  13   3   13.26    0.74
   5  13   3   12.96    0.75
  -5  13  -3   14.74    0.79
  -5  13  -3   14.90    0.69
   5  13   3   13.70    0.74
   5  13   3   14.06    0.72
   5   0   4   -0.05    0.07
  -5   0  -4   -0.11    0.07
  -5   0   4   -0.20    0.12
   5   0  -4   -0.01    0.13
  -5   0   4   -0.11    0.12
  -5   0  -4   -0.11    0.07
   5   0  -4   -0.20    0.14
  -5   0  -4    0.03    0.07
  -5   1   4  157.91    3.83
  -5  -1  -4  156.13    3.81
  -5  -1  -4  160.99    3.75
   5   1  -4  157.97    3.83
  -5  -1  -4  161.33    3.67
   5   1  -4  158.36    3.96
  -5   1   4  159.36    3.84
  -5   1   4  159.48    3.69
  -5   1  -4  156.11    3.73
   5   1   4  157.36    3.75
  -5   1  -4  158.36    3.73
   5  -1  -4  154.36    3.83
   5  -1  -4  157.33    3.95
  -5  -1   4  154.29    3.82
   5   2  -4   65.87    1.74
  -5   2   4   66.53    1.75
   5   2  -4   69.24    1.82
  -5   2   4   68.45    1.65
   5  -2   4   68.94    1.65
   5  -2  -4   68.58    1.82
  -5   2  -4   68.58    1.73
   5  -2  -4   67.83    1.75
  -5   2  -4   69.19    1.65
  -5  -2   4   67.42    1.74
   5   2   4   67.09    1.68
  -5  -2   4   67.02    1.65
  -5   2  -4   67.85    1.65
   5  -3   4   93.39    2.27
   5   3  -4   93.31    2.35
   5   3  -4   94.92    2.43
  -5   3   4   96.35    2.26
  -5   3   4   92.70    2.36
  -5   3  -4   90.61    2.26
   5   3   4   92.98    2.30
   5   3   4   91.48    2.25
   5  -3  -4   94.35    2.26
  -5   3  -4   93.83    2.32
   5  -3  -4   91.57    2.44
  -5   4   4   50.74    1.23
   5   4  -4   48.06    1.42
   5  -4   4   53.43    1.31
  -5   4   4   50.59    1.39
   5   4  -4   48.38    1.37
  -5   4   4   50.22    1.31
   5   4   4   51.27    1.34
  -5   4  -4   49.30    1.37
   5   4   4   52.35    1.27
   5   4   4   52.07    1.24
   5  -4  -4   50.14    1.45
  -5   4  -4   48.71    1.30
   5   4   4   51.37    1.32
  -5   5   4   81.61    1.90
   5  -5   4   85.31    2.06
  -5   5   4   79.23    2.13
   5   5  -4   80.81    2.12
  -5   5   4   83.56    2.05
   5   5  -4   81.36    2.19
   5   5   4   79.80    2.05
   5   5   4   81.32    2.09
  -5   5  -4   79.76    2.05
   5  -5  -4   80.32    2.20
   5   5   4   80.87    1.89
  -5   5  -4   80.69    1.86
   5   5   4   83.31    2.04
  -5   5  -4   80.76    2.11
  -5   6   4   10.65    0.48
  -5   6   4   11.71    0.53
   5   6  -4   10.50    0.50
   5  -6   4   11.38    0.46
  -5   6   4   10.39    0.47
   5  -6   4   11.02    0.57
   5   6   4   10.67    0.48
  -5   6  -4   10.69    0.45
  -5  -6   4   11.39    0.47
  -5   6  -4    9.84    0.44
   5   6   4   10.68    0.47
   5  -6  -4   10.23    0.55
  -5   6  -4    8.87    0.49
   5   6   4   10.67    0.46
   5   6   4   11.02    0.43
  -5   7   4   92.00    2.43
  -5   7   4   88.36    2.34
   5   7  -4   93.94    2.07
   5  -7   4   89.27    2.35
  -5   7   4   90.99    2.15
   5   7  -4   94.67    2.42
  -5   7  -4   93.43    2.36
   5   7   4   88.09    2.33
   5   7   4   89.48    2.38
  -5   7  -4   90.91    2.11
   5  -7  -4   90.69    2.49
  -5  -7   4   90.72    2.26
  -5   7  -4   90.22    2.38
   5   7   4   90.31    2.15
   5   8  -4    7.91    0.51
  -5   8   4    5.98    0.50
   5  -8   4    6.55    0.59
  -5   8   4    5.88    0.46
  -5   8   4    6.48    0.46
   5   8  -4    7.66    0.51
   5   8  -4    7.43    0.40
  -5   8  -4    6.63    0.45
  -5  -8   4    7.13    0.44
   5   8   4    6.94    0.45
  -5   8  -4    7.51    0.45
   5  -8  -4    6.42    0.52
   5   8   4    5.99    0.43
   5   8   4    6.32    0.42
  -5   8  -4    7.14    0.54
   5   9  -4   54.82    1.64
  -5   9   4   53.75    1.65
   5   9  -4   55.78    1.61
  -5   9   4   53.77    1.59
   5   9  -4   56.27    1.39
  -5   9   4   58.40    1.51
   5   9   4   56.07    1.60
   5   9   4   56.62    1.64
   5   9   4   55.98    1.49
  -5   9  -4   53.05    1.63
  -5  -9   4   58.21    1.52
  -5   9  -4   55.53    1.60
  -5   9  -4   56.00    1.44
   5  10  -4    7.15    0.42
  -5  10   4    6.47    0.49
   5  10  -4    7.84    0.54
   5  10  -4    6.34    0.51
  -5  10   4    6.53    0.52
  -5  10   4    7.11    0.51
  -5  10  -4    6.32    0.47
   5  10   4    6.52    0.46
   5  10   4    6.39    0.47
   5  10   4    6.48    0.47
  -5 -10   4    6.70    0.47
  -5  10  -4    7.19    0.52
  -5  10  -4    7.34    0.47
   5  11  -4    2.30    0.36
  -5  11   4    1.94    0.35
  -5  11   4    2.28    0.36
   5  11  -4    2.39    0.36
   5  11  -4    2.82    0.32
  -5  11   4    1.85    0.35
   5  11   4    2.99    0.38
   5  11   4    2.39    0.38
  -5  11  -4    2.47    0.40
  -5 -11   4    2.89    0.35
  -5  11  -4    3.06    0.36
   5  11   4    2.06    0.34
  -5  12   4    8.10    0.55
   5  12  -4    7.29    0.58
  -5  12   4    6.52    0.54
  -5  12   4    8.28    0.58
   5  12  -4    7.92    0.58
   5  12  -4    7.20    0.47
   5  12   4    8.16    0.56
   5  12   4    7.82    0.54
  -5  12  -4    7.29    0.51
  -5  12  -4    8.86    0.63
   5  12   4    7.34    0.57
  -5  13   4    4.59    0.52
   5  13  -4    4.18    0.48
  -5  13   4    3.42    0.45
  -5  13   4    4.34    0.49
   5  13  -4    3.60    0.46
   5  13  -4    4.08    0.41
   5  13   4    4.04    0.48
   5  13   4    3.83    0.46
  -5  13  -4    3.81    0.51
  -5  13  -4    3.86    0.43
   5  13   4    3.31    0.45
  -5   0  -5    0.01    0.06
  -5   0   5    0.00    0.07
  -5   0  -5    0.02    0.06
  -5   0   5    0.04    0.13
  -5   0   5   -0.05    0.11
   5   0   5   -0.02    0.06
   5   0  -5   -0.02    0.17
   5   0  -5   -0.18    0.13
   5   1  -5   19.90    0.69
  -5   1   5   18.94    0.61
  -5   1   5   19.23    0.51
   5   1  -5   21.02    0.63
  -5   1   5   18.26    0.62
  -5  -1  -5   20.46    0.52
  -5  -1  -5   20.02    0.53
  -5  -1   5   18.70    0.62
  -5  -1   5   18.68    0.51
   5  -1  -5   19.86    0.63
   5  -1  -5   18.85    0.67
  -5  -1   5   18.60    0.62
   5   1   5   19.83    0.52
   5  -2   5  109.02    2.52
  -5   2   5  107.64    2.51
   5   2  -5  102.65    2.64
  -5   2   5  111.96    2.66
   5   2  -5  103.04    2.74
   5  -2  -5  103.83    2.65
  -5   2  -5  106.36    2.52
   5  -2  -5  103.39    2.75
   5   2   5  109.65    2.56
  -5   2  -5  105.53    2.52
  -5   2  -5  102.18    2.60
   5   2   5  105.52    2.51
  -5  -2   5  107.72    2.63
  -5  -2   5  105.15    2.52
   5   3  -5   63.58    1.73
  -5   3   5   68.06    1.76
   5   3  -5   67.35    1.82
   5  -3   5   66.38    1.63
  -5   3   5   68.36    1.64
   5  -3   5   66.24    1.70
   5   3   5   67.53    1.68
  -5  -3   5   68.07    1.69
  -5   3  -5   64.93    1.63
   5  -3  -5   66.47    1.64
  -5  -3   5   66.18    1.64
   5   3   5   66.00    1.64
   5  -3  -5   66.86    1.82
  -5   3  -5   65.15    1.72
   5  -4   5  261.89    6.40
  -5   4   5  275.75    5.90
   5   4  -5  276.43    6.83
   5  -4   5  281.83    6.52
   5   4  -5  269.16    6.61
  -5   4   5  271.40    6.45
  -5   4   5  276.45    6.63
  -5   4  -5  282.74    6.53
  -5   4  -5  269.97    6.52
   5   4   5  286.86    6.63
   5   4   5  273.73    6.56
  -5  -4   5  277.57    6.39
   5   4   5  273.21    6.43
   5  -4  -5  271.27    6.83
   5  -5   5    5.33    0.30
   5   5  -5    5.30    0.35
  -5   5   5    4.64    0.37
  -5   5   5    4.91    0.33
   5   5  -5    5.05    0.39
  -5   5   5    5.44    0.36
   5   5   5    4.39    0.31
   5   5   5    4.59    0.31
  -5  -5   5    5.70    0.35
  -5   5  -5    4.86    0.32
   5   5   5    4.93    0.33
  -5   5  -5    5.11    0.29
   5   5   5    5.10    0.26
  -5   5  -5    5.22    0.37
   5  -5  -5    5.42    0.42
  -5   6   5   11.63    0.49
   5   6  -5   11.03    0.53
  -5   6   5   10.47    0.54
  -5   6   5   10.68    0.48
   5  -6   5   12.12    0.47
   5   6  -5   11.85    0.57
  -5  -6   5   11.68    0.50
  -5   6  -5   10.59    0.45
   5   6   5   11.15    0.43
   5   6   5   11.03    0.48
   5   6   5   10.88    0.48
   5  -6  -5   11.23    0.61
  -5   6  -5   12.07    0.57
  -5   6  -5   11.22    0.47
   5   6   5   11.00    0.49
  -5   7   5   23.80    0.84
   5  -7   5   22.34    0.88
   5   7  -5   24.38    0.83
  -5   7   5   23.72    0.81
  -5   7   5   22.75    0.76
   5  -7  -5   24.08    0.90
   5   7   5   22.14    0.79
  -5   7  -5   21.70    0.76
  -5   7  -5   22.80    0.72
   5   7   5   22.58    0.80
   5   7   5   23.56    0.77
  -5   7  -5   22.34    0.85
  -5  -7   5   23.97    0.78
  -5   8   5    8.24    0.50
   5   8  -5    9.82    0.42
   5   8  -5    9.88    0.55
  -5   8   5    8.69    0.50
   5  -8   5    9.09    0.62
  -5   8   5    8.57    0.50
  -5   8  -5    9.80    0.50
  -5   8  -5   10.05    0.48
   5   8   5    8.52    0.49
  -5   8  -5    9.29    0.54
   5  -8  -5   10.32    0.62
  -5  -8   5    9.78    0.51
   5   8   5    8.14    0.49
   5   8   5    8.02    0.48
  -5   9   5    6.26    0.46
  -5   9   5    6.05    0.48
   5  -9   5    6.04    0.54
  -5   9   5    6.33    0.46
   5   9  -5    6.70    0.49
   5   9  -5    6.98    0.38
  -5   9  -5    6.16    0.52
   5   9   5    5.91    0.44
  -5   9  -5    6.68    0.43
   5   9   5    6.22    0.42
  -5  -9   5    6.30    0.45
   5   9   5    5.61    0.42
   5  10  -5   73.84    2.12
   5  10  -5   75.13    1.80
  -5  10   5   74.25    1.92
   5 -10   5   75.75    2.10
   5  10  -5   75.07    2.08
  -5  10   5   73.16    2.06
  -5  10   5   72.04    2.14
  -5 -10   5   74.85    1.98
   5  10   5   73.70    1.91
  -5  10  -5   75.54    1.85
   5  10   5   72.65    2.11
   5  10   5   74.34    2.07
  -5  10  -5   74.97    2.13
   5  11  -5   -0.25    0.24
   5 -11   5   -0.23    0.37
  -5  11   5   -0.18    0.25
  -5  11   5   -0.16    0.27
   5  11  -5    0.06    0.23
   5  11  -5   -0.20    0.24
  -5  11   5   -0.27    0.25
   5  11   5   -0.10    0.25
  -5  11  -5   -0.24    0.25
   5  11   5    0.18    0.29
  -5 -11   5    0.16    0.27
  -5  11  -5   -0.53    0.27
   5  11   5    0.13    0.26
  -5  12   5   18.79    0.89
  -5  12   5   18.51    0.84
   5  12  -5   18.46    0.87
  -5  12   5   18.97    0.81
   5  12  -5   19.98    0.89
   5  12  -5   18.89    0.70
  -5 -12   5   18.87    0.78
  -5  12  -5   18.98    0.90
  -5  12  -5   19.87    0.76
   5  12   5   18.06    0.80
   5  12   5   19.74    0.88
   5  12   5   18.85    0.85
  -5  13   5    2.01    0.41
  -5  13   5    2.38    0.42
  -5  13   5    2.63    0.44
  -5  13  -5    2.63    0.46
  -5  13  -5    2.22    0.37
   5  13   5    2.76    0.42
   5  13   5    2.20    0.41
   5  13   5    2.09    0.42
   5   0  -6   -0.07    0.14
  -5   0  -6   -0.09    0.11
  -5   0   6   -0.14    0.13
  -5   0   6    0.05    0.13
   5   0  -6   -0.09    0.18
  -5  -1  -6  139.50    3.30
  -5   1   6  134.91    3.23
  -5   1   6  140.08    3.42
  -5  -1  -6  136.78    3.41
  -5   1   6  139.98    3.44
   5   1  -6  137.30    3.42
   5   1  -6  141.29    3.57
   5   1   6  141.88    3.30
  -5  -1   6  141.43    3.24
  -5  -1   6  138.32    3.43
   5  -1  -6  137.30    3.43
  -5  -1   6  142.03    3.42
  -5   1  -6  138.92    3.37
   5  -1  -6  136.90    3.56
  -5  -1   6  144.63    3.35
  -5   2   6   39.58    1.10
   5   2  -6   37.46    1.15
   5   2  -6   36.34    1.07
   5  -2   6   38.91    1.07
  -5  -2  -6   37.56    0.98
  -5   2   6   38.78    0.95
   5   2   6   40.24    0.99
  -5  -2   6   38.23    1.08
   5  -2  -6   37.08    1.09
  -5  -2   6   39.06    0.96
  -5  -2   6   40.29    1.08
  -5   2  -6   37.08    1.06
   5  -2  -6   37.80    1.15
   5   2   6   38.60    0.96
  -5   3   6   39.76    1.17
   5   3  -6   41.24    1.16
  -5  -3  -6   41.72    1.04
   5  -3   6   41.59    1.03
   5   3  -6   40.92    1.23
   5  -3   6   39.12    1.15
  -5   3   6   40.22    1.04
  -5  -3   6   41.70    1.15
   5   3   6   40.79    1.08
  -5   3  -6   41.12    1.15
   5   3   6   41.27    1.06
  -5   3  -6   41.49    1.03
   5  -3  -6   41.59    1.25
  -5  -3   6   41.75    1.15
   5  -3  -6   40.69    1.04
  -5  -3   6   41.24    1.06
  -5  -3   6   41.59    1.13
  -5   4   6   18.31    0.58
  -5   4   6   17.19    0.65
   5  -4   6   17.30    0.68
   5  -4   6   17.61    0.54
   5   4  -6   18.20    0.65
  -5   4   6   17.39    0.56
   5   4  -6   17.87    0.72
   5   4   6   17.88    0.50
  -5  -4   6   17.51    0.64
   5  -4  -6   18.78    0.57
   5   4   6   18.02    0.59
   5   4   6   17.71    0.58
  -5   4  -6   18.85    0.54
   5  -4  -6   19.68    0.75
  -5   4  -6   19.09    0.67
   5  -5   6   76.20    1.83
   5   5  -6   68.71    2.00
  -5   5   6   71.99    1.71
  -5   5   6   73.34    1.95
  -5   5   6   71.08    1.82
   5   5  -6   74.46    1.93
  -5   5  -6   71.81    1.91
   5  -5  -6   73.66    2.03
   5   5   6   67.96    1.86
  -5   5  -6   69.47    1.67
   5   5   6   71.30    1.72
   5   5   6   76.86    1.81
   5   5   6   68.96    1.82
  -5   5  -6   71.11    1.82
  -5  -5   6   72.11    1.86
   5  -6   6   25.11    0.77
   5   6  -6   25.47    0.92
  -5   6   6   25.07    0.79
  -5   6   6   24.69    0.79
  -5   6   6   25.20    0.88
   5   6  -6   26.38    0.87
   5   6   6   23.95    0.80
  -5   6  -6   25.33    0.73
  -5   6  -6   24.65    0.77
   5   6   6   24.40    0.78
   5   6   6   26.38    0.74
  -5  -6   6   25.97    0.85
  -5   6  -6   24.51    0.87
   5  -6  -6   27.17    0.97
   5   6   6   23.76    0.82
   5   7  -6   81.78    2.10
   5   7  -6   78.52    2.20
   5  -7   6   74.82    2.06
  -5   7   6   78.53    1.88
  -5   7   6   75.29    2.11
  -5   7   6   77.12    2.00
   5  -7  -6   76.94    2.17
  -5  -7   6   78.69    2.01
   5   7   6   76.28    1.88
   5   7   6   73.41    2.04
  -5   7  -6   76.79    2.08
  -5   7  -6   77.63    1.81
   5   7   6   73.83    2.00
  -5   7  -6   74.30    1.99
  -5   7  -6   74.24    1.95
   5   8  -6    0.64    0.29
  -5   8   6    0.54    0.24
  -5   8   6    0.40    0.23
   5   8  -6    0.55    0.26
   5  -8   6    0.73    0.36
  -5   8   6    0.22    0.26
   5   8   6    0.40    0.24
  -5   8  -6    0.34    0.27
   5   8   6    0.48    0.22
  -5  -8   6    0.67    0.27
  -5   8  -6    0.84    0.24
   5  -8  -6    0.64    0.32
   5   8   6    0.71    0.23
   5  -9   6   49.94    1.51
   5   9  -6   48.41    1.46
  -5   9   6   49.99    1.34
  -5   9   6   48.66    1.49
  -5   9   6   46.54    1.39
   5  -9  -6   46.18    1.52
  -5   9  -6   45.65    1.24
   5   9   6   46.92    1.32
  -5   9  -6   46.90    1.47
   5   9   6   44.08    1.42
   5   9   6   44.05    1.39
  -5  -9   6   48.73    1.38
  -5  10   6    3.19    0.40
   5 -10   6    2.98    0.47
   5  10  -6    3.74    0.43
  -5  10   6    4.03    0.40
  -5  10   6    3.56    0.40
   5  10   6    2.83    0.37
   5  10   6    3.80    0.41
  -5  10  -6    3.07    0.42
  -5 -10   6    3.79    0.40
   5  10   6    3.92    0.40
  -5  10  -6    3.43    0.36
  -5  11   6    1.52    0.33
  -5  11   6    1.95    0.37
  -5  11   6    1.71    0.34
   5 -11   6    1.67    0.45
  -5  11  -6    1.88    0.31
   5  11   6    2.08    0.35
  -5  11  -6    1.93    0.40
   5  11   6    1.56    0.33
   5  11   6    1.66    0.34
  -5 -11   6    2.42    0.37
  -5  12   6    2.62    0.40
  -5  12   6    2.50    0.39
  -5  12   6    2.45    0.41
   5 -12   6    2.27    0.50
   5  12   6    1.76    0.36
  -5 -12   6    3.41    0.43
  -5  12  -6    1.99    0.34
   5  12   6    2.21    0.37
   5  12   6    2.10    0.40
  -5  12  -6    2.38    0.42
  -5  13   6    5.38    0.54
   5  13   6    6.19    0.56
  -5  13  -6    6.35    0.49
  -5   0  -7   -0.08    0.13
   5   0  -7    0.09    0.16
   5   0  -7    0.02    0.22
  -5   0   7   -0.04    0.14
  -5   0   7   -0.11    0.14
   5   1  -7   23.13    0.82
   5   1  -7   22.90    0.72
  -5   1   7   22.00    0.73
  -5   1   7   21.09    0.74
   5  -1   7   21.40    0.71
  -5  -1  -7   23.45    0.65
  -5   1   7   21.89    0.71
   5  -1  -7   22.51    0.80
  -5  -1   7   21.97    0.72
  -5   1  -7   23.00    0.71
  -5  -1   7   21.82    0.71
  -5   1  -7   22.89    0.70
   5  -1  -7   22.99    0.73
  -5  -1   7   22.84    0.75
  -5   2   7   77.05    1.78
   5   2  -7   72.54    1.95
   5   2  -7   75.74    2.08
  -5   2   7   75.88    1.95
  -5  -2  -7   73.78    1.89
   5  -2   7   74.44    1.93
  -5   2   7   75.42    1.98
  -5  -2   7   77.84    1.96
  -5   2  -7   75.86    1.93
   5   2   7   78.03    1.84
   5  -2  -7   76.26    2.08
  -5  -2   7   75.47    1.94
  -5  -2   7   74.62    1.80
   5  -3   7   11.62    0.57
   5  -3   7   14.78    0.39
  -5   3   7   14.11    0.43
  -5  -3  -7   13.39    0.44
  -5   3   7   13.65    0.56
   5   3  -7   14.22    0.65
   5   3  -7   13.88    0.54
  -5   3  -7   13.83    0.38
   5  -3  -7   13.97    0.43
  -5  -3   7   15.33    0.53
  -5  -3   7   14.22    0.45
  -5   3  -7   13.47    0.38
  -5  -3   7   15.31    0.55
   5   3   7   14.33    0.47
  -5  -3   7   14.71    0.59
   5   3   7   13.29    0.45
   5  -3  -7   14.71    0.66
  -5   3  -7   14.09    0.56
   5   4  -7  155.01    4.09
  -5   4   7  161.13    3.76
   5  -4   7  161.42    3.85
  -5   4   7  152.51    3.94
   5  -4   7  164.38    3.79
   5   4  -7  154.45    3.92
  -5   4   7  155.10    3.48
  -5  -4  -7  157.23    3.87
  -5  -4   7  163.66    3.84
   5   4   7  164.64    3.87
   5  -4  -7  159.34    3.76
  -5   4  -7  157.99    3.71
  -5   4  -7  158.56    3.79
   5   4   7  157.76    3.77
  -5   4  -7  160.49    3.88
   5   4   7  157.54    3.85
   5  -4  -7  153.85    4.08
   5  -5   7    0.34    0.14
  -5   5   7    0.27    0.17
   5   5  -7    0.16    0.21
  -5   5   7    0.33    0.22
  -5   5   7    0.02    0.19
   5   5  -7    0.57    0.26
   5  -5  -7    0.43    0.31
  -5   5  -7    0.59    0.16
  -5  -5   7    0.04    0.25
   5   5   7    0.45    0.18
  -5   5  -7    0.41    0.24
   5   5   7    0.71    0.19
  -5   5  -7    0.42    0.15
   5   5   7    0.37    0.12
  -5   6   7   25.12    0.77
   5   6  -7   23.21    0.93
  -5   6   7   24.11    0.87
  -5   6   7   24.00    0.76
   5   6  -7   24.74    0.85
  -5   6  -7   22.91    0.85
   5   6   7   22.91    0.77
   5   6   7   25.10    0.80
  -5   6  -7   23.76    0.71
  -5  -6   7   24.68    0.84
   5   6   7   24.46    0.79
   5  -6  -7   23.37    0.94
   5   7  -7   23.27    0.82
  -5   7   7   22.51    0.74
  -5   7   7   21.83    0.74
   5   7  -7   21.19    0.86
   5  -7   7   22.91    0.88
  -5   7   7   21.36    0.81
   5   7   7   21.62    0.75
  -5  -7   7   20.05    0.77
  -5   7  -7   21.25    0.80
   5   7   7   20.38    0.74
   5  -7  -7   21.23    0.86
   5   7   7   21.11    0.76
  -5   7  -7   21.14    0.67
   5   8  -7    8.77    0.51
  -5   8   7    6.47    0.47
   5   8  -7    6.77    0.53
  -5   8   7    6.99    0.47
  -5   8   7    6.11    0.41
   5  -8   7    7.09    0.58
   5  -8  -7    7.44    0.57
  -5   8  -7    7.31    0.52
   5   8   7    6.18    0.42
  -5   8  -7    7.43    0.41
   5   8   7    6.83    0.44
  -5  -8   7    6.67    0.49
   5   8   7    6.49    0.45
   5  -9   7    5.16    0.53
  -5   9   7    5.80    0.49
  -5   9   7    5.51    0.45
   5   9  -7    5.25    0.46
   5   9  -7    5.03    0.50
  -5   9   7    6.03    0.44
   5  -9  -7    6.54    0.57
  -5   9  -7    4.81    0.46
  -5   9  -7    5.02    0.38
  -5  -9   7    6.36    0.50
   5   9   7    4.89    0.42
   5   9   7    5.17    0.44
   5   9   7    4.56    0.42
   5 -10   7   61.06    1.76
   5  10  -7   54.32    1.81
  -5  10   7   57.82    1.57
  -5  10   7   55.49    1.65
  -5  10   7   56.09    1.76
   5  10   7   56.21    1.58
   5  10   7   56.40    1.67
  -5  10  -7   57.04    1.47
   5  10   7   57.34    1.71
  -5  10  -7   54.85    1.72
  -5 -10   7   56.90    1.64
  -5  11   7    2.32    0.39
  -5  11   7    1.77    0.37
   5 -11   7    1.74    0.45
   5  11  -7    2.50    0.41
  -5  11   7    1.83    0.34
  -5  11  -7    1.55    0.35
   5  11   7    1.63    0.34
   5  11   7    2.05    0.39
  -5  11  -7    2.71    0.33
  -5 -11   7    2.10    0.38
   5  11   7    1.42    0.32
   5 -12   7   18.82    1.00
  -5  12   7   21.32    0.90
  -5  12   7   19.32    0.86
  -5  12   7   21.76    0.98
  -5 -12   7   21.78    0.88
  -5  12  -7   22.32    0.98
   5  12   7   19.60    0.87
   5  12   7   20.60    0.93
   5  12   7   22.31    0.93
   5   0  -8   -0.37    0.24
  -5   0   8   -0.08    0.17
   5   0  -8   -0.40    0.17
  -5   0   8   -0.10    0.15
   5   0   8   -0.09    0.21
  -5   0  -8    0.18    0.16
  -5   1   8  150.80    3.63
   5   1  -8  143.85    3.80
   5   1  -8  145.25    3.62
  -5  -1  -8  146.90    3.64
  -5   1   8  148.03    3.58
  -5   1   8  146.55    3.64
   5  -1   8  147.37    3.54
   5  -1  -8  144.40    3.79
  -5   1  -8  145.12    3.68
   5   1   8  146.31    3.50
   5  -1  -8  150.12    3.64
  -5  -1   8  154.01    3.62
  -5   1  -8  144.15    3.56
  -5  -1   8  142.17    3.62
   5  -2   8   38.80    1.13
  -5  -2  -8   36.54    1.02
   5   2  -8   36.83    1.21
   5   2  -8   37.40    1.10
  -5   2   8   37.77    1.13
  -5   2   8   38.30    1.11
  -5  -2   8   36.54    1.09
   5   2   8   39.16    0.96
  -5  -2   8   40.02    1.11
   5  -2  -8   36.31    1.20
  -5  -2   8   38.06    1.13
  -5   2  -8   36.78    1.08
   5   3  -8   33.25    1.09
   5  -3   8   30.39    1.00
  -5   3   8   30.71    0.99
  -5   3   8   30.65    0.82
  -5   3   8   30.40    0.97
  -5  -3  -8   30.25    0.86
   5   3  -8   30.97    0.95
  -5  -3   8   30.84    0.99
  -5  -3   8   31.91    0.95
   5   3   8   32.10    0.85
  -5   3  -8   32.49    0.96
   5  -3  -8   30.53    1.05
   5   3   8   31.33    0.83
  -5  -3   8   31.69    0.92
  -5  -3   8   30.88    0.81
   5  -4   8    0.27    0.11
  -5   4   8    0.74    0.22
  -5   4   8    0.80    0.20
   5   4  -8    0.25    0.20
  -5   4   8    0.33    0.28
   5   4  -8    0.47    0.27
  -5   4   8    0.39    0.14
  -5  -4  -8    0.57    0.16
   5  -4   8    0.46    0.30
   5   4   8    0.21    0.16
  -5  -4   8   -0.21    0.26
  -5   4  -8    0.36    0.24
   5   4   8    0.33    0.16
   5  -4  -8    0.29    0.14
  -5   4  -8    0.63    0.12
   5  -4  -8    0.87    0.32
  -5   5   8   31.48    0.90
   5   5  -8   32.20    1.13
  -5   5   8   31.65    0.89
  -5   5   8   31.02    1.03
   5  -5   8   31.81    1.06
   5  -5   8   32.67    0.88
   5   5  -8   31.91    1.01
   5   5   8   33.26    0.95
   5  -5  -8   32.54    1.13
  -5  -5   8   31.35    1.03
   5   5   8   33.38    0.93
  -5   5  -8   31.88    1.03
   5   6  -8   12.14    0.57
  -5   6   8   11.30    0.52
  -5   6   8   12.33    0.49
   5   6  -8   11.61    0.63
   5  -6   8   12.89    0.65
  -5   6   8   12.61    0.57
   5   6   8   11.86    0.54
   5   6   8   12.09    0.52
   5   6   8   12.60    0.51
  -5   6  -8   12.50    0.47
   5  -6  -8   13.02    0.68
  -5  -6   8   12.37    0.59
  -5   6  -8   12.15    0.59
  -5   7   8   49.41    1.51
   5   7  -8   52.09    1.50
  -5   7   8   50.96    1.38
   5  -7   8   50.06    1.51
  -5   7   8   51.06    1.35
  -5  -7   8   50.55    1.47
   5  -7  -8   50.65    1.58
  -5   7  -8   50.12    1.48
   5   7   8   49.54    1.44
   5   7   8   50.23    1.42
   5   7   8   48.60    1.35
  -5   8   8   12.05    0.63
   5  -8   8   12.74    0.71
   5   8  -8   12.23    0.68
  -5   8   8   12.34    0.56
  -5   8   8   12.05    0.59
   5   8   8   12.13    0.59
   5  -8  -8   13.25    0.72
  -5   8  -8   12.80    0.65
   5   8   8   12.16    0.59
  -5  -8   8   12.40    0.64
   5   8   8   12.05    0.58
  -5   9   8   42.68    1.24
   5  -9   8   43.07    1.39
  -5   9   8   41.37    1.37
  -5   9   8   41.22    1.26
   5   9   8   41.14    1.30
   5   9   8   43.25    1.26
   5  -9  -8   42.52    1.43
   5   9   8   40.80    1.32
  -5  -9   8   41.87    1.32
  -5   9  -8   39.89    1.33
  -5  10   8    2.85    0.40
   5 -10   8    2.66    0.49
  -5  10   8    3.13    0.39
  -5  10   8    2.88    0.34
   5  10  -8    2.87    0.44
   5 -10  -8    3.00    0.45
   5  10   8    3.13    0.38
  -5  10  -8    3.01    0.41
   5  10   8    2.93    0.40
   5  10   8    2.32    0.34
  -5 -10   8    2.81    0.41
  -5  11   8    1.38    0.33
  -5  11   8    1.41    0.30
   5 -11   8    1.80    0.48
  -5  11   8    1.49    0.37
   5  11  -8    1.32    0.40
  -5  11  -8    1.60    0.38
  -5 -11   8    0.60    0.37
   5  11   8    1.25    0.31
   5  11   8    0.89    0.35
   5  11   8    1.72    0.33
  -5  12   8    4.95    0.47
  -5  12   8    4.38    0.50
   5 -12   8    4.08    0.60
   5  12  -8    3.95    0.54
  -5  12   8    4.62    0.52
   5  12   8    4.09    0.48
  -5  12  -8    4.05    0.51
   5  12   8    4.08    0.48
  -5 -12   8    4.68    0.52
   5  12   8    3.88    0.45
   5   0  -9   -0.24    0.24
   5   0   9   -0.18    0.23
  -5   0  -9    0.05    0.18
  -5   0  -9   -0.09    0.18
  -5   0   9    0.11    0.16
  -5   0   9    0.26    0.19
   5   0  -9    0.00    0.19
  -5   1   9    3.75    0.38
   5   1  -9    4.26    0.35
   5  -1   9    3.93    0.37
  -5   1   9    4.61    0.35
   5   1  -9    3.55    0.41
  -5   1   9    4.08    0.34
  -5  -1  -9    3.93    0.32
  -5  -1   9    4.01    0.34
   5  -1  -9    3.53    0.40
  -5   1  -9    4.10    0.35
  -5   1  -9    3.64    0.34
   5  -1  -9    3.45    0.32
  -5  -1   9    3.93    0.33
   5   1   9    4.38    0.37
  -5  -2  -9   60.21    1.61
  -5   2   9   60.61    1.67
  -5   2   9   60.88    1.69
   5   2  -9   59.79    1.66
   5   2  -9   60.13    1.80
   5  -2   9   62.03    1.68
   5   2   9   65.87    1.50
  -5  -2   9   60.18    1.66
  -5   2  -9   62.46    1.71
   5   2   9   64.52    1.50
  -5   2  -9   60.65    1.63
   5  -2  -9   59.59    1.79
   5   2   9   62.10    1.61
   5   3  -9   16.80    0.75
  -5   3   9   16.98    0.70
   5   3  -9   16.97    0.64
  -5   3   9   17.95    0.67
  -5  -3  -9   17.44    0.58
  -5   3   9   17.95    0.56
   5  -3   9   16.88    0.72
   5  -3  -9   18.73    0.80
   5   3   9   17.33    0.62
  -5  -3   9   16.75    0.64
  -5   3  -9   18.06    0.66
   5   3   9   17.57    0.54
   5   3   9   17.48    0.52
  -5  -3   9   16.38    0.73
  -5   4   9   68.67    1.60
   5   4  -9   65.85    1.80
  -5   4   9   66.48    1.82
  -5  -4  -9   65.83    1.73
   5  -4   9   66.28    1.83
   5   4  -9   64.83    1.95
  -5   4   9   66.29    1.84
   5  -4  -9   68.05    1.96
  -5   4  -9   67.29    1.79
   5   4   9   67.14    1.68
   5   4   9   69.11    1.72
  -5  -4   9   67.39    1.83
  -5   5   9    3.08    0.29
   5   5  -9    2.95    0.39
   5  -5   9    3.18    0.39
  -5   5   9    3.19    0.33
   5   5  -9    3.78    0.35
  -5   5   9    3.26    0.37
  -5   5  -9    3.31    0.33
  -5  -5   9    3.13    0.38
   5   5   9    3.38    0.29
   5   5   9    3.48    0.28
   5  -5  -9    3.21    0.39
  -5   6   9   21.39    0.81
  -5   6   9   22.15    0.72
   5   6  -9   22.75    0.92
   5  -6   9   19.20    0.84
  -5   6   9   21.18    0.82
   5   6   9   21.56    0.71
   5  -6  -9   22.15    0.88
   5   6   9   21.30    0.74
  -5  -6   9   21.34    0.82
  -5   6  -9   22.22    0.80
   5  -7   9    5.45    0.51
   5   7  -9    5.42    0.52
  -5   7   9    6.28    0.43
  -5   7   9    5.63    0.44
   5   7   9    6.29    0.40
   5  -7  -9    4.79    0.49
  -5  -7   9    5.91    0.48
   5   7   9    6.14    0.44
  -5   7  -9    5.47    0.45
   5   7   9    5.64    0.38
  -5   8   9    2.95    0.36
   5  -8   9    3.23    0.47
   5   8  -9    3.67    0.46
  -5   8   9    3.75    0.38
   5  -8  -9    3.65    0.45
  -5   8  -9    3.44    0.40
  -5  -8   9    3.70    0.42
   5   8   9    3.38    0.35
   5   8   9    3.20    0.33
   5   8   9    2.49    0.36
   5   9  -9    9.44    0.68
  -5   9   9   10.84    0.59
  -5   9   9    9.62    0.58
   5  -9   9    9.94    0.74
  -5  -9   9    8.97    0.62
   5   9   9    8.76    0.55
   5   9   9   10.13    0.58
   5  -9  -9   10.03    0.67
  -5   9  -9    8.26    0.59
   5   9   9    9.53    0.55
  -5  10   9   39.82    1.37
   5 -10   9   39.21    1.40
  -5  10   9   40.58    1.23
   5  10  -9   37.45    1.41
   5  10   9   38.82    1.29
   5 -10  -9   37.44    1.38
   5  10   9   38.73    1.26
  -5  10  -9   37.86    1.32
   5  10   9   38.99    1.22
  -5 -10   9   40.90    1.33
  -5  11   9    1.80    0.36
  -5  11   9    1.00    0.35
   5  11  -9    0.58    0.39
   5 -11   9    1.58    0.52
  -5  11  -9    1.65    0.39
  -5 -11   9    1.60    0.40
   5  11   9    1.24    0.35
   5  11   9    0.92    0.32
   5  11   9    1.31    0.32
  -5   0 -10   -0.14    0.20
  -5   0 -10   -0.10    0.19
  -5   0  10    0.07    0.18
  -5   0  10   -0.06    0.25
   5   0  10   -0.16    0.24
   5   0 -10   -0.37    0.25
   5   0 -10    0.02    0.19
  -5  -1 -10   65.59    1.70
   5  -1  10   62.31    1.71
  -5   1  10   61.04    1.74
   5   1 -10   63.81    1.88
  -5   1  10   62.30    1.71
   5   1 -10   61.23    1.69
  -5  -1  10   61.75    1.75
   5   1  10   64.25    1.68
  -5   1 -10   64.48    1.67
   5  -1 -10   62.41    1.86
  -5   1 -10   64.09    1.74
  -5  -1  10   63.57    1.70
  -5   2  10   26.19    0.88
   5   2 -10   28.65    1.03
  -5  -2 -10   27.08    0.83
   5  -2  10   27.32    0.94
   5   2 -10   26.85    0.87
  -5   2  10   25.98    0.93
  -5  -2  10   26.25    0.86
  -5   2 -10   29.78    0.88
  -5  -2  10   26.61    0.94
   5  -2 -10   27.85    1.03
   5   2  10   27.29    0.87
  -5   2 -10   27.73    0.92
  -5   3  10   10.26    0.55
  -5  -3 -10    9.66    0.44
   5  -3  10   10.84    0.57
  -5   3  10   11.33    0.52
   5   3 -10    9.84    0.59
   5   3  10   10.89    0.37
  -5   3 -10    9.91    0.50
   5  -3 -10    9.73    0.62
   5   3  10   11.14    0.49
  -5  -3  10   10.21    0.48
  -5  -3  10   10.17    0.56
  -5   3 -10   11.44    0.57
   5   3  10   10.38    0.34
   5   4 -10   11.02    0.62
   5  -4  10   12.43    0.62
  -5   4  10   12.33    0.47
  -5   4  10   11.02    0.59
  -5   4  10   12.41    0.56
   5   4  10   12.23    0.44
   5  -4 -10   11.40    0.62
  -5  -4  10   11.59    0.60
   5   4  10   12.52    0.50
  -5   4 -10   11.96    0.53
   5   4  10   12.33    0.42
  -5   5  10   21.53    0.81
   5   5 -10   19.75    0.89
   5  -5  10   20.89    0.87
  -5   5  10   22.77    0.69
  -5   5  10   21.94    0.81
  -5   5 -10   21.79    0.78
   5  -5 -10   20.58    0.87
   5   5  10   21.85    0.68
  -5  -5  10   22.57    0.87
   5   5  10   21.50    0.69
   5   6 -10    2.21    0.38
  -5   6  10    2.33    0.32
   5  -6  10    2.10    0.39
  -5   6  10    2.05    0.28
  -5   6  10    2.41    0.36
  -5   6 -10    1.88    0.32
  -5  -6  10    2.17    0.36
   5   6  10    1.96    0.24
   5  -6 -10    2.18    0.40
   5   6  10    2.02    0.24
  -5   7  10   33.70    1.15
   5  -7  10   33.14    1.19
  -5   7  10   33.15    1.12
  -5   7  10   35.12    1.01
   5   7 -10   33.13    1.23
   5   7  10   34.25    1.06
   5  -7 -10   33.81    1.23
  -5   7 -10   35.22    1.13
   5   7  10   33.14    1.03
  -5  -7  10   32.87    1.14
   5   8 -10    0.11    0.30
  -5   8  10    0.10    0.26
   5  -8  10    0.63    0.38
  -5   8  10   -0.06    0.28
  -5   8  10    0.05    0.24
   5  -8 -10    0.14    0.34
   5   8  10    0.01    0.21
   5   8  10   -0.22    0.21
  -5   8 -10    0.06    0.28
  -5  -8  10   -0.31    0.31
   5  -9  10   27.19    1.10
  -5   9  10   27.28    0.94
  -5   9  10   27.21    1.05
  -5   9  10   26.50    0.99
   5   9 -10   25.72    1.13
   5   9  10   27.10    0.96
   5   9  10   28.10    0.98
  -5  -9  10   27.01    1.05
   5  -9 -10   27.07    1.10
   5   9  10   25.79    0.94
  -5   9 -10   26.25    1.03
   5  10 -10    1.79    0.44
  -5  10  10    1.84    0.37
  -5  10  10    1.29    0.34
   5 -10  10    1.18    0.46
   5  10  10    1.50    0.31
   5  10  10    1.81    0.36
  -5  10 -10    1.25    0.37
   5  10  10    1.95    0.34
   5 -10 -10    1.31    0.39
  -5 -10  10    1.73    0.40
   5   0  11   -0.04    0.23
   5   0 -11   -0.04    0.28
  -5   0  11    0.07    0.25
  -5   0  11   -0.21    0.16
  -5   0 -11    0.03    0.20
  -5   0 -11   -0.15    0.17
  -5   1  11   23.28    0.80
  -5   1  11   23.47    0.87
   5   1 -11   24.59    0.96
  -5  -1 -11   24.24    0.78
   5  -1  11   21.93    0.84
   5   1  11   23.43    0.82
  -5   1 -11   25.40    0.78
  -5  -1  11   21.90    0.77
  -5   1 -11   24.96    0.83
  -5  -1  11   22.97    0.87
   5  -1 -11   22.96    0.91
  -5   2  11   18.55    0.77
   5   2 -11   18.75    0.85
  -5  -2 -11   18.77    0.67
  -5   2  11   18.89    0.70
   5  -2  11   18.82    0.76
   5  -2 -11   19.27    0.82
   5   2  11   20.63    0.72
  -5   2 -11   20.49    0.69
  -5  -2  11   19.15    0.69
  -5   2 -11   19.67    0.75
  -5  -2  11   19.22    0.79
  -5   3  11   10.57    0.52
   5   3 -11    9.52    0.63
   5  -3  11   10.54    0.58
  -5   3  11   10.54    0.57
  -5  -3  11    9.66    0.57
  -5  -3  11   10.02    0.48
   5  -3 -11    9.97    0.64
  -5   3 -11   10.13    0.57
   5   3  11    9.85    0.34
  -5   3 -11   11.39    0.52
   5   3  11   10.52    0.51
   5   4 -11   40.45    1.41
  -5   4  11   42.05    1.27
  -5   4  11   40.44    1.29
   5  -4  11   43.33    1.34
   5   4  11   42.34    1.11
  -5   4 -11   42.35    1.23
   5  -4 -11   39.09    1.37
  -5   4 -11   42.61    1.33
  -5  -4  11   41.45    1.32
   5   4  11   41.67    1.08
  -5  -4  11   39.87    1.22
   5  -5  11    1.41    0.36
  -5   5  11    0.79    0.30
  -5   5  11    1.51    0.27
   5   5 -11    1.42    0.34
  -5   5  11    1.54    0.25
  -5   5 -11    1.45    0.33
  -5  -5  11    1.20    0.35
   5   5  11    0.82    0.18
   5  -5 -11    1.18    0.37
  -5   5 -11    1.19    0.28
   5   5  11    1.28    0.20
  -5   6  11   10.22    0.49
  -5   6  11    8.84    0.57
   5   6 -11    8.73    0.61
  -5   6  11    8.32    0.52
   5  -6  11    8.40    0.61
   5   6  11    9.16    0.44
  -5   6 -11    9.72    0.55
  -5  -6  11    9.73    0.60
   5   6  11    9.07    0.43
   5  -6 -11   10.51    0.66
  -5   7  11    8.05    0.55
  -5   7  11    7.97    0.46
   5  -7  11    8.45    0.66
  -5   7  11    7.95    0.54
   5   7 -11    7.34    0.59
  -5  -7  11    8.39    0.59
  -5   7 -11    8.10    0.54
   5   7  11    8.20    0.45
   5  -7 -11    8.62    0.63
   5   7  11    8.48    0.46
  -5   8  11    7.84    0.55
   5  -8  11    7.56    0.64
  -5   8  11    7.15    0.53
   5   8 -11    8.48    0.63
  -5   8  11    8.14    0.50
   5   8  11    7.92    0.46
  -5   8 -11    7.61    0.53
   5   8  11    7.20    0.47
   5  -8 -11    7.56    0.63
  -5  -8  11    7.47    0.61
  -5   9  11    3.38    0.42
   5   9 -11    2.87    0.47
  -5   9  11    3.57    0.41
  -5   9  11    3.23    0.43
   5  -9  11    3.81    0.55
  -5  -9  11    3.23    0.50
   5   9  11    3.49    0.38
   5   9  11    3.87    0.38
  -5   9 -11    2.85    0.42
   5  -9 -11    3.47    0.49
   5 -10  11   30.02    1.27
  -5  10  11   29.42    1.10
  -5  10  11   29.63    1.04
  -5 -10  11   30.70    1.16
  -5   0  12   -0.24    0.19
  -5   0 -12   -0.19    0.19
   5   0  12    0.40    0.28
   5   0 -12    0.03    0.28
  -5   0 -12   -0.02    0.23
  -5   0  12    0.15    0.28
   5  -1  12   56.92    1.61
  -5   1  12   54.73    1.56
   5   1 -12   53.31    1.74
  -5  -1 -12   56.52    1.51
  -5   1  12   54.93    1.64
  -5   1 -12   56.33    1.52
   5   1  12   58.91    1.60
   5  -1 -12   53.65    1.72
  -5   1 -12   57.49    1.62
  -5  -1  12   55.50    1.65
  -5  -1  12   56.61    1.55
  -5   2  12    9.44    0.49
   5  -2  12    9.72    0.57
  -5   2  12    9.23    0.57
   5   2 -12    8.67    0.63
  -5   2 -12    9.66    0.54
  -5  -2  12    9.28    0.57
  -5   2 -12    8.62    0.48
  -5  -2  12    9.34    0.47
   5  -2 -12    8.85    0.64
   5   2  12   11.08    0.55
   5  -3  12   10.27    0.61
   5   3 -12    9.80    0.63
  -5   3  12   10.03    0.52
  -5   3  12   11.33    0.61
   5   3  12   11.00    0.55
  -5  -3  12   11.10    0.62
  -5  -3  12   10.86    0.50
   5  -3 -12    9.92    0.66
  -5   3 -12   10.78    0.53
  -5   3 -12   11.02    0.58
   5  -4  12    7.94    0.57
   5   4 -12    8.65    0.63
  -5   4  12    8.13    0.49
  -5   4  12    8.59    0.55
  -5   4 -12    8.43    0.54
   5   4  12    8.02    0.31
  -5  -4  12    8.11    0.44
  -5   4 -12    8.46    0.49
   5  -4 -12    8.55    0.63
  -5  -4  12    7.83    0.56
   5   4  12    8.41    0.34
  -5   5  12   14.49    0.71
  -5   5  12   14.50    0.66
   5  -5  12   14.26    0.76
   5   5 -12   13.79    0.75
  -5  -5  12   13.98    0.60
   5   5  12   14.37    0.50
  -5   5 -12   13.52    0.62
  -5  -5  12   14.54    0.73
   5   5  12   13.79    0.51
  -5   5 -12   13.13    0.71
   5  -5 -12   14.51    0.78
   5  -6  12    9.24    0.65
  -5   6  12    8.47    0.58
   5   6 -12    8.89    0.64
  -5   6  12    9.59    0.56
  -5   6 -12    9.54    0.62
   5  -6 -12    9.63    0.66
   5   6  12    8.66    0.43
   5   6  12    7.86    0.41
  -5  -6  12    9.97    0.62
   5   7 -12   30.61    1.21
   5  -7  12   26.78    1.11
  -5   7  12   27.26    1.02
  -5   7  12   28.37    1.03
  -5   7  12   28.03    0.90
   5   7  12   26.58    0.91
  -5  -7  12   28.34    1.09
  -5   7 -12   26.07    1.10
   5  -7 -12   30.87    1.18
   5   7  12   28.87    0.90
   5   8 -12    4.75    0.57
  -5   8  12    5.62    0.46
  -5   8  12    6.08    0.54
  -5   8  12    5.11    0.49
   5  -8  12    5.40    0.60
  -5  -8  12    5.29    0.56
   5  -8 -12    5.11    0.55
   5   8  12    5.02    0.42
   5   8  12    6.15    0.43
   5   9 -12   16.13    0.94
   5  -9  12   17.37    0.98
  -5   9  12   17.58    0.83
  -5   9  12   17.04    0.74
  -5   9  12   15.81    0.78
  -5  -9  12   17.13    0.90
   5   9  12   17.13    0.72
   5   9  12   17.63    0.74
  -5   0  13   -0.29    0.17
   5   0 -13   -0.35    0.28
   5   0  13    0.00    0.28
  -5   0  13    0.53    0.30
  -5   1  13    1.30    0.35
  -5   1  13    1.87    0.27
   5  -1  13    2.12    0.36
   5   1 -13    1.82    0.39
   5  -1 -13    2.24    0.41
  -5   1 -13    1.74    0.32
  -5  -1  13    2.07    0.26
   5   1  13    1.64    0.33
  -5  -1  13    1.79    0.38
   5  -2  13   21.29    0.89
   5   2 -13   22.66    0.98
  -5   2  13   21.46    0.79
  -5   2  13   22.74    0.90
   5   2  13   22.20    0.84
   5  -2 -13   22.44    0.97
  -5   2 -13   23.15    0.87
  -5  -2  13   20.98    0.89
  -5  -2  13   21.79    0.77
  -5   3  13    0.16    0.21
   5  -3  13   -0.01    0.29
  -5   3  13    0.52    0.30
   5   3 -13    0.14    0.34
   5   3  13    0.13    0.27
  -5  -3  13    0.23    0.32
  -5   3 -13    0.22    0.28
   5  -3 -13    0.20    0.34
  -5  -3  13    0.15    0.18
  -5   4  13   46.38    1.46
   5   4 -13   43.72    1.55
  -5   4  13   46.88    1.40
   5  -4  13   44.74    1.47
  -5  -4  13   43.87    1.33
  -5  -4  13   44.02    1.47
   5  -4 -13   47.91    1.56
  -5   4 -13   48.99    1.50
  -5   5  13    2.98    0.41
   5  -5  13    2.76    0.45
  -5   5  13    2.94    0.35
   5   5 -13    3.68    0.47
   5   5  13    2.93    0.23
  -5  -5  13    3.24    0.45
  -5   5 -13    3.02    0.40
   5  -5 -13    2.23    0.45
   5   5  13    3.20    0.26
  -5  -5  13    3.20    0.32
  -5   6  13   10.33    0.60
   5   6 -13   11.25    0.75
   5  -6  13    9.90    0.72
  -5   6  13   10.60    0.65
  -5   6 -13   11.47    0.68
   5   6  13   11.18    0.46
   5  -6 -13   11.57    0.73
  -5  -6  13   10.93    0.54
  -5  -6  13    9.72    0.67
   5   6  13   11.03    0.47
  -5   7  13    3.73    0.42
   5  -7  13    4.36    0.57
   5   7 -13    4.23    0.54
  -5   7  13    4.00    0.47
  -5   7 -13    3.96    0.49
   5  -7 -13    4.29    0.53
  -5  -7  13    3.65    0.53
   5   7  13    4.39    0.36
   5   7  13    4.28    0.35
   5   0 -14   -0.27    0.33
  -5   0  14   -0.02    0.19
   5   0  14    0.05    0.31
  -5   0  14   -0.08    0.29
   5   1 -14   39.08    1.41
  -5   1  14   40.79    1.37
   5  -1  14   41.93    1.34
  -5   1  14   38.70    1.20
   5  -1 -14   40.43    1.43
  -5  -1  14   40.92    1.37
   5   1  14   41.66    1.30
  -5  -1  14   39.27    1.19
   5  -2  14   10.70    0.67
  -5   2  14   10.69    0.67
  -5   2  14   11.31    0.53
   5   2 -14   10.80    0.72
  -5  -2  14   10.43    0.68
  -5  -2  14   10.44    0.50
   5  -2 -14   11.43    0.73
   5   2  14   10.54    0.59
   5   3 -14    3.33    0.47
   5  -3  14    3.66    0.46
  -5   3  14    4.11    0.48
  -5   3  14    3.75    0.35
  -5  -3  14    3.50    0.32
   5   3  14    3.89    0.42
  -5  -3  14    3.87    0.48
  -5   3 -14    3.65    0.40
   5  -3 -14    3.03    0.46
   5   4 -14    1.19    0.38
   5  -4  14    1.65    0.43
  -5   4  14    1.32    0.37
  -5   4  14    1.21    0.27
  -5   4 -14    1.85    0.35
  -5  -4  14    1.60    0.26
   5  -4 -14    1.05    0.40
  -5  -4  14    2.16    0.42
  -5   5  14    9.45    0.55
  -5   5  14    8.41    0.62
   5  -5  14   10.28    0.72
   5   5 -14    8.21    0.66
  -5   5 -14    9.71    0.63
  -5  -5  14    9.28    0.66
   5  -5 -14    9.11    0.70
  -5  -5  14    9.98    0.50
   5  -6  14    1.04    0.46
   5   6 -14    1.26    0.44
  -5   6  14    1.03    0.38
  -5   6  14    1.07    0.29
   5  -6 -14    0.52    0.40
  -5   6 -14    0.85    0.36
  -5  -6  14    1.13    0.25
  -5  -6  14    0.83    0.39
  -5   0  15   -0.16    0.35
   5   0 -15   -0.27    0.35
   5   0  15   -0.17    0.32
  -5   0  15    0.01    0.20
  -5   1  15    7.06    0.58
   5   1 -15    4.96    0.55
   5  -1  15    5.44    0.55
  -5   1  15    5.79    0.42
  -5  -1  15    6.15    0.59
  -5  -1  15    6.14    0.40
   5   1  15    7.02    0.54
   5  -1 -15    5.71    0.59
  -5   2  15   18.88    0.91
   5  -2  15   17.75    0.87
  -5   2  15   18.37    0.74
   5   2 -15   20.25    0.97
  -5  -2  15   19.44    0.70
  -5  -2  15   20.20    0.92
   5   2  15   18.84    0.81
   5  -2 -15   18.99    0.96
  -5   3  15    7.30    0.47
   5   3 -15    6.92    0.66
   5  -3  15    7.83    0.66
  -5   3  15    7.05    0.59
  -5  -3  15    6.68    0.42
  -5  -3  15    7.71    0.63
   5  -3 -15    7.65    0.68
   5  -4  15   27.14    1.13
   6   0   0  187.73    4.54
  -6   0   0  190.70    4.64
  -6   0   0  188.47    4.54
   6   0   0  191.68    4.65
  -6   1   0   15.44    0.50
  -6   1   0   14.72    0.49
   6  -1   0   15.75    0.50
   6  -1   0   15.58    0.50
   6  -1   0   15.51    0.51
   6   1   0   15.50    0.49
  -6  -1   0   15.35    0.47
   6   1   0   15.89    0.48
  -6   2   0  200.35    5.00
   6   2   0  205.33    5.01
   6  -2   0  211.92    5.15
  -6   2   0  214.78    4.95
  -6   2   0  210.35    5.14
   6  -2   0  207.15    5.00
   6   2   0  214.25    5.10
  -6  -2   0  209.69    5.09
   6  -2   0  206.38    5.00
   6  -3   0    0.26    0.19
   6   3   0    0.47    0.12
   6   3   0    0.48    0.15
   6  -3   0    0.14    0.12
  -6   3   0    0.43    0.15
  -6   3   0    0.23    0.14
  -6   4   0    0.79    0.17
   6   4   0    1.39    0.20
  -6   4   0    1.29    0.19
   6   4   0    1.34    0.17
  -6   4   0    1.05    0.19
   6  -4   0    1.37    0.22
  -6   5   0    2.94    0.25
   6   5   0    2.99    0.27
  -6   5   0    3.28    0.27
   6   5   0    2.89    0.27
  -6   5   0    2.50    0.26
  -6   6   0   97.42    2.47
   6   6   0   97.49    2.45
   6   6   0   96.99    2.50
  -6   6   0   95.02    2.48
   6   6   0   98.52    2.22
  -6   6   0   95.38    2.23
   6   7   0    0.27    0.20
   6   7   0    0.46    0.22
  -6   7   0    0.40    0.25
   6   7   0    0.62    0.21
  -6   7   0    0.54    0.24
  -6   7   0    0.30    0.22
   6   8   0  194.70    4.31
  -6   8   0  195.05    4.84
   6   8   0  195.23    4.86
   6   8   0  191.65    4.75
  -6   8   0  196.61    4.80
  -6   8   0  195.97    4.34
  -6   9   0   55.18    1.45
  -6   9   0   53.93    1.60
   6   9   0   52.64    1.56
  -6   9   0   52.86    1.59
   6   9   0   52.35    1.59
   6   9   0   55.67    1.42
  -6  10   0    2.39    0.38
  -6  10   0    3.07    0.38
  -6  10   0    2.80    0.36
   6  10   0    2.88    0.37
   6  10   0    3.02    0.38
   6  10   0    3.21    0.36
  -6  11   0   15.84    0.76
   6  11   0   14.95    0.72
  -6  11   0   15.15    0.68
   6  11   0   14.79    0.71
  -6  11   0   15.12    0.76
   6  11   0   15.60    0.67
  -6  12   0   10.26    0.61
   6  12   0   10.23    0.58
   6  12   0    9.94    0.62
  -6  12   0    9.37    0.58
  -6  12   0   10.44    0.67
   6  12   0   10.09    0.61
  -6  13   0    0.81    0.35
   6  13   0    1.16    0.34
   6  13   0    1.44    0.35
  -6  13   0    1.04    0.36
   6  13   0    0.88    0.36
  -6  13   0    1.27    0.39
  -6   0   1   37.32    0.98
  -6   0  -1   33.10    0.93
  -6   0   1   38.39    0.98
   6   0  -1   33.79    0.97
   6   0   1   34.32    0.94
   6   0   1   37.70    0.95
  -6   0  -1   33.11    0.93
  -6   0  -1   34.56    0.94
   6   0  -1   33.80    0.96
   6  -1   1   64.10    1.64
   6   1  -1   65.61    1.65
  -6   1   1   61.58    1.65
   6  -1   1   62.48    1.60
  -6  -1  -1   62.96    1.60
  -6  -1  -1   63.28    1.60
   6  -1  -1   65.16    1.67
   6  -1  -1   65.30    1.63
   6   1   1   66.38    1.60
  -6   1  -1   64.51    1.64
  -6   1  -1   63.72    1.60
  -6  -1   1   62.32    1.64
   6   1   1   62.97    1.60
  -6   1  -1   62.73    1.60
  -6   2   1  139.31    3.32
   6  -2   1  139.05    3.36
  -6   2   1  138.93    3.38
   6  -2   1  137.90    3.35
   6  -2   1  139.50    3.46
   6   2  -1  141.15    3.44
   6   2  -1  134.84    3.38
   6  -2  -1  139.34    3.48
   6   2   1  137.25    3.36
  -6   2  -1  137.98    3.34
   6  -2  -1  135.81    3.38
  -6   2  -1  141.97    3.46
   6   2   1  142.80    3.39
  -6   2  -1  132.48    3.35
   6  -2  -1  140.19    3.38
  -6  -2   1  141.60    3.44
  -6   3   1  598.80   14.05
   6  -3   1  609.80   14.46
   6   3  -1  608.22   14.68
   6   3  -1  587.47   14.28
  -6   3   1  574.20   14.28
   6  -3   1  589.75   14.11
  -6   3  -1  596.06   14.04
   6   3   1  604.75   14.24
  -6   3  -1  585.25   14.09
   6   3   1  610.83   14.54
  -6   4   1   29.08    0.79
  -6   4   1   29.39    0.86
   6  -4   1   28.82    0.85
   6   4  -1   30.12    0.86
   6   4  -1   28.00    0.87
  -6   4   1   28.16    0.87
   6   4   1   30.23    0.87
   6   4   1   30.85    0.81
   6  -4  -1   27.66    0.91
  -6   4  -1   28.14    0.88
  -6   4  -1   29.19    0.85
   6   4   1   30.71    0.86
  -6   5   1   75.70    1.81
   6   5  -1   81.12    2.04
  -6   5   1   79.02    2.00
  -6   5   1   75.54    2.02
   6  -5  -1   77.65    2.11
  -6   5  -1   78.38    2.01
  -6   5  -1   76.11    1.80
  -6   5  -1   75.91    2.00
   6   5   1   78.46    1.98
   6   5   1   78.43    2.02
  -6   6   1   18.75    0.68
   6   6  -1   19.64    0.71
  -6   6   1   19.32    0.64
  -6   6   1   19.81    0.70
   6   6  -1   20.68    0.70
   6   6  -1   19.50    0.61
   6   6   1   18.00    0.67
  -6   6  -1   18.94    0.69
   6   6   1   19.20    0.61
  -6   6  -1   18.97    0.68
   6   6   1   17.74    0.66
  -6   6  -1   18.81    0.63
   6   7  -1   17.78    0.59
  -6   7   1   16.52    0.68
  -6   7   1   17.11    0.69
   6   7  -1   16.64    0.67
  -6   7   1   17.21    0.63
  -6   7  -1   18.01    0.63
  -6   7  -1   16.30    0.67
   6   7   1   17.14    0.66
   6   7   1   17.20    0.62
  -6   7  -1   16.85    0.65
   6   7   1   17.57    0.66
  -6   8   1    1.64    0.32
   6   8  -1    1.93    0.28
  -6   8   1    2.15    0.33
  -6   8   1    2.22    0.32
   6   8  -1    2.45    0.32
   6   8  -1    1.96    0.31
   6   8   1    1.57    0.29
   6   8   1    1.90    0.30
  -6   8  -1    1.92    0.32
   6   8   1    1.78    0.30
  -6   8  -1    1.73    0.32
  -6   8  -1    1.94    0.30
  -6   9   1   34.94    1.06
   6   9  -1   36.43    1.03
   6   9  -1   35.38    1.17
   6   9  -1   36.90    1.16
  -6   9   1   32.25    1.13
  -6   9   1   36.76    1.18
   6   9   1   34.82    1.03
   6   9   1   33.51    1.13
  -6   9  -1   36.68    1.06
  -6   9  -1   37.10    1.17
  -6   9  -1   35.37    1.18
   6   9   1   33.29    1.15
  -6  10   1    0.32    0.29
   6  10  -1    0.50    0.26
   6  10  -1    0.60    0.27
  -6  10   1    0.30    0.26
   6  10  -1    0.40    0.26
  -6  10   1    0.51    0.28
  -6  10  -1    0.30    0.25
  -6  10  -1    0.28    0.29
  -6  10  -1    0.30    0.26
   6  10   1    0.30    0.25
   6  10   1    0.24    0.25
   6  10   1    0.47    0.25
   6  11  -1   21.82    0.87
  -6  11   1   19.38    0.85
  -6  11   1   20.34    0.88
  -6  11   1   20.29    0.81
   6  11  -1   20.35    0.77
   6  11  -1   20.10    0.87
  -6  11  -1   21.16    0.87
  -6  11  -1   20.28    0.87
   6  11   1   20.80    0.86
   6  11   1   20.54    0.78
  -6  11  -1   20.62    0.81
   6  11   1   20.37    0.88
  -6  12   1   -0.04    0.26
   6  12  -1    0.58    0.29
  -6  12   1    0.04    0.30
   6  12  -1    0.48    0.28
  -6  12   1    0.43    0.30
   6  12  -1    0.94    0.29
   6  12   1    0.43    0.29
  -6  12  -1    0.42    0.29
   6  12   1    0.45    0.28
  -6  12  -1    0.00    0.27
   6  12   1    0.41    0.27
  -6  12  -1    0.42    0.31
  -6  13   1   14.48    0.80
  -6  13   1   14.76    0.76
   6  13  -1   15.96    0.81
   6  13  -1   15.40    0.71
  -6  13   1   15.07    0.80
   6  13  -1   15.12    0.81
   6  13   1   14.54    0.71
  -6  13  -1   15.58    0.83
   6  13   1   15.25    0.81
   6  13   1   14.62    0.81
  -6  13  -1   13.99    0.74
  -6   0   2   84.16    2.14
   6   0   2   86.22    2.09
  -6   0  -2   84.90    2.09
   6   0  -2   82.51    2.14
  -6   0  -2   87.39    2.10
   6   0  -2   85.94    2.19
   6   0   2   85.95    2.12
  -6   0  -2   86.82    2.13
   6  -1   2    3.51    0.21
  -6   1   2    3.35    0.23
  -6   1   2    2.94    0.23
   6   1  -2    3.51    0.26
   6   1  -2    3.15    0.27
  -6  -1  -2    3.34    0.16
  -6  -1  -2    3.04    0.22
  -6  -1   2    3.03    0.26
   6   1   2    3.32    0.22
   6  -1  -2    3.52    0.27
  -6   1  -2    3.71    0.20
  -6   1  -2    3.56    0.25
   6   1   2    2.91    0.17
   6  -1  -2    3.57    0.24
  -6   1  -2    3.38    0.21
  -6   2   2  193.35    4.77
   6  -2   2  197.52    4.72
   6   2  -2  198.14    4.88
   6   2  -2  199.09    4.77
  -6   2   2  199.10    4.67
  -6   2  -2  205.81    4.71
   6   2   2  192.48    4.73
  -6   2  -2  192.77    4.72
   6   2   2  198.87    4.78
   6  -2  -2  199.85    4.91
  -6   2  -2  201.25    4.87
   6  -2  -2  196.12    4.77
   6   3  -2    6.49    0.35
   6  -3   2    6.76    0.32
   6   3  -2    6.32    0.33
  -6   3   2    6.42    0.33
  -6   3   2    7.16    0.34
   6   3   2    6.61    0.24
   6   3   2    6.68    0.32
   6  -3  -2    6.57    0.39
  -6   3  -2    6.74    0.31
  -6   3  -2    6.29    0.35
  -6   4   2   -0.14    0.15
   6  -4   2    0.15    0.12
  -6   4   2    0.10    0.17
  -6   4   2   -0.05    0.14
   6   4  -2    0.33    0.17
   6   4  -2    0.00    0.15
   6   4   2    0.08    0.14
   6   4   2    0.04    0.14
   6  -4  -2    0.04    0.21
   6   4   2    0.19    0.10
  -6   4  -2    0.04    0.17
  -6   4  -2    0.02    0.13
  -6   5   2   55.45    1.45
   6   5  -2   54.16    1.48
  -6   5   2   53.42    1.48
   6   5  -2   53.29    1.49
  -6   5   2   52.23    1.31
   6  -5   2   54.20    1.43
   6  -5  -2   53.12    1.54
   6   5   2   54.82    1.46
  -6   5  -2   53.76    1.46
  -6   5  -2   51.23    1.43
   6   5   2   54.76    1.43
  -6   5  -2   53.22    1.31
[truncated: 480,185 more chars]
